# Supplementary material for: Genome-Wide Analysis Reveals Novel Regulators of Growth in Drosophila melanogaster
Source: PLoS Genet. 2016 Jan 11;12(1):e1005616. doi: 10.1371/journal.pgen.1005616 (PMC4709145; doi:10.1371/journal.pgen.1005616)
Supplement: S3 Table — Nominally significant SNPs (p<10−05) from GWAS for Centroid size (CS), inversion modeled centroid size (CSIC), interocular distance (IOD), inversion modeled interocular distance (IODIC) and relative centroid size (rCS) in both sexes. (XLS) [file pgen.1005616.s014.xls]

## Sheet: CS
														FEMALES										MALES
Phenotype	Chromosome	Position	Gene Symbol	FlyBase ID	SNP Location	Site Class	Alias	Lines with minor allele	MAF	Mean Coverage	Major Allele	Minor Allele	Reference SNP	Pvalue	Qvalue	N	Null Log Likelihood	Alternative Log Likelihood	SNP Fixed effect	SNP Fixed effect SE	Null Log (σ2E/σ2G)	Null Genetic Variance (σ2G)	Null Residual Variance (σ2E)	Pvalue	Qvalue	N	Null Log Likelihood	Alternative Log Likelihood	SNP Fixed effect	SNP Fixed effect SE	Null Log (σ2E/σ2G)	Null Genetic Variance (σ2G)	Null Residual Variance (σ2E)
CS	2L	4697386	CG34351	FBgn0085380	CG34351-in	intronic	CG15633,FBgn0031625,FBgn0031624,CG11928,CG11928,CG15633	23	0.142857	15	T	C	C	0.000273228	0.585664	143	174.475	176.931	0.0221158	0.00592362	-0.883599	0.00361542	0.00149423	6.10209e-07	0.166049	143	189.909	198.113	0.0265214	0.00507466	-3.98794	0.00419753	7.78132e-05
CS	2L	4697388	CG34351	FBgn0085380	CG34351-in	intronic	CG15633,FBgn0031625,FBgn0031624,CG11928,CG11928,CG15633	24	0.149068	16	A	C	C	0.000269704	0.585664	143	174.475	176.959	0.0224045	0.00599518	-0.883599	0.00361542	0.00149423	6.29002e-07	0.166049	143	189.909	198.096	0.0268047	0.00513545	-3.98794	0.00419753	7.78132e-05
CS	2L	8807137	CG42712	FBgn0261629	-2263	intergenic		18	0.111801	16	T	C	T	2.16298e-06	0.211669	143	174.475	181.41	-0.0279886	0.0056636	-0.883599	0.00361542	0.00149423	0.000163332	0.704922	143	189.909	192.616	-0.0203829	0.00526139	-3.98794	0.00419753	7.78132e-05
CS	2L	9426788	Fbp2	FBgn0000640	-72	intergenic	CG3763-RA,CG3763-PA,fat body protein P6,CG3763,T19,P6,Protein-6,Fbp-2	20	0.124224	23	C	T	C	9.85906e-06	0.30415	143	174.475	179.035	-0.0260236	0.00567398	-0.883599	0.00361542	0.00149423	4.60387e-05	0.596234	143	189.909	193.711	-0.0227402	0.00540703	-3.98794	0.00419753	7.78132e-05
CS	2L	9426788	Mco1	FBgn0032116	446	intergenic	laccase-like	20	0.124224	23	C	T	C	9.85906e-06	0.30415	143	174.475	179.035	-0.0260236	0.00567398	-0.883599	0.00361542	0.00149423	4.60387e-05	0.596234	143	189.909	193.711	-0.0227402	0.00540703	-3.98794	0.00419753	7.78132e-05
CS	2L	9443469	Gdi		-48449	intergenic	FBgn0010224,FBgn0014258,CG4422,GDI,Gdi-related,N7-3,rab GDP dissociation inhibitor,dGDI,rab GDI,l(2)N7-3,GdI,Rab GDP dissociation inhibitor	12	0.0740741	11	T	C	C	5.74556e-06	0.256872	143	174.475	179.961	-0.0272758	0.00578492	-0.883599	0.00361542	0.00149423	5.46899e-05	0.611756	143	189.909	193.885	-0.0241568	0.00580463	-3.98794	0.00419753	7.78132e-05
CS	2L	9443469	CG33723		2729	intergenic	FBgn0010532,FBgn0010684,Numb,dNumb,CG3779,nb,N7-1,d-Numb,d-numb,l(2)3235,l(2)03235,l(2)s2201,Nb,numbs	12	0.0740741	11	T	C	C	5.74556e-06	0.256872	143	174.475	179.961	-0.0272758	0.00578492	-0.883599	0.00361542	0.00149423	5.46899e-05	0.611756	143	189.909	193.885	-0.0241568	0.00580463	-3.98794	0.00419753	7.78132e-05
CS	2L	9443469	numb		numb-in	intronic	FBgn0010532,FBgn0010684,Numb,dNumb,CG3779,nb,N7-1,d-Numb,d-numb,l(2)3235,l(2)03235,l(2)s2201,Nb,numbs	12	0.0740741	11	T	C	C	5.74556e-06	0.256872	143	174.475	179.961	-0.0272758	0.00578492	-0.883599	0.00361542	0.00149423	5.46899e-05	0.611756	143	189.909	193.885	-0.0241568	0.00580463	-3.98794	0.00419753	7.78132e-05
CS	2L	9487588	Gdi		-4330	intergenic	FBgn0010224,FBgn0014258,CG4422,GDI,Gdi-related,N7-3,rab GDP dissociation inhibitor,dGDI,rab GDI,l(2)N7-3,GdI,Rab GDP dissociation inhibitor	11	0.068323	14	A	G	A	2.5658e-06	0.211669	143	174.475	181.276	-0.0283384	0.00578019	-0.883599	0.00361542	0.00149423	3.17757e-07	0.166049	143	189.909	198.591	-0.0278989	0.00519608	-3.98794	0.00419753	7.78132e-05
CS	2L	9487588	CG33723		46848	intergenic	FBgn0010532,FBgn0010684,Numb,dNumb,CG3779,nb,N7-1,d-Numb,d-numb,l(2)3235,l(2)03235,l(2)s2201,Nb,numbs	11	0.068323	14	A	G	A	2.5658e-06	0.211669	143	174.475	181.276	-0.0283384	0.00578019	-0.883599	0.00361542	0.00149423	3.17757e-07	0.166049	143	189.909	198.591	-0.0278989	0.00519608	-3.98794	0.00419753	7.78132e-05
CS	2L	10432968	TfIIB		TfIIB-u3	UTR	FBgn0023206,dmTFIIB,TFIIB,CG5193,dTFIIB,Tfiib,dTfIIB	12	0.0731707	10	T	A	T	9.85545e-06	0.30415	143	174.475	180.054	-0.0266174	0.00580333	-0.883599	0.00361542	0.00149423	5.34405e-05	0.611756	143	189.909	193.833	-0.0220954	0.00530174	-3.98794	0.00419753	7.78132e-05
CS	2L	10432968	CG5337		CG5337-u3	UTR	FBgn0023206,dmTFIIB,TFIIB,CG5193,dTFIIB,Tfiib,dTfIIB	12	0.0731707	10	T	A	T	9.85545e-06	0.30415	143	174.475	180.054	-0.0266174	0.00580333	-0.883599	0.00361542	0.00149423	5.34405e-05	0.611756	143	189.909	193.833	-0.0220954	0.00530174	-3.98794	0.00419753	7.78132e-05
CS	2L	18908808	ssp3		-7717	intergenic	FBgn0032722,CG10666,CG18397,Ssp3	16	0.0993789	19	G	T	G	1.33026e-05	0.30415	143	174.475	179.79	-0.0258804	0.00573316	-0.883599	0.00361542	0.00149423	3.88101e-06	0.320249	143	189.909	196.308	-0.0248489	0.0051694	-3.98794	0.00419753	7.78132e-05
CS	2L	18908808	tup		27552	intergenic	FBgn0002017,FBgn0015395,CG10619,islet,Islet 1,Islet,isl,Isl,lethal(2)37Aa,l(2)E41,l(2)37Aa,tailup/islet,Tup,dIslet	16	0.0993789	19	G	T	G	1.33026e-05	0.30415	143	174.475	179.79	-0.0258804	0.00573316	-0.883599	0.00361542	0.00149423	3.88101e-06	0.320249	143	189.909	196.308	-0.0248489	0.0051694	-3.98794	0.00419753	7.78132e-05
CS	2L	19598303	Lar	FBgn0000464	-8266	intergenic	FBgn0010057,bypass,Dlar,LAR,DLAR,dlar,DLar,CG10443,PTP38A,leukocyte-antigen-related-like,LAR receptor tyrosine phosphatase	13	0.0797546	9	T	C	T	6.26392e-06	0.258374	143	174.475	180.516	-0.0262943	0.00560099	-0.883599	0.00361542	0.00149423	0.000426932	0.782671	143	189.909	191.837	-0.0188709	0.00522966	-3.98794	0.00419753	7.78132e-05
CS	2L	19598303	CG10366	FBgn0032814	11863	intergenic		13	0.0797546	9	T	C	T	6.26392e-06	0.258374	143	174.475	180.516	-0.0262943	0.00560099	-0.883599	0.00361542	0.00149423	0.000426932	0.782671	143	189.909	191.837	-0.0188709	0.00522966	-3.98794	0.00419753	7.78132e-05
CS	2L	19598307	Lar	FBgn0000464	-8262	intergenic	FBgn0010057,bypass,Dlar,LAR,DLAR,dlar,DLar,CG10443,PTP38A,leukocyte-antigen-related-like,LAR receptor tyrosine phosphatase	14	0.0853659	10	T	A	T	8.42885e-06	0.30415	143	174.475	180.24	-0.0261239	0.0056496	-0.883599	0.00361542	0.00149423	0.000550865	0.802599	143	189.909	191.611	-0.018659	0.00527744	-3.98794	0.00419753	7.78132e-05
CS	2L	19598307	CG10366	FBgn0032814	11867	intergenic		14	0.0853659	10	T	A	T	8.42885e-06	0.30415	143	174.475	180.24	-0.0261239	0.0056496	-0.883599	0.00361542	0.00149423	0.000550865	0.802599	143	189.909	191.611	-0.018659	0.00527744	-3.98794	0.00419753	7.78132e-05
CS	2L	19715501	CG10462	FBgn0032815	-16579	intergenic	FBgn0062418,CG10462-RA,CG10462-PA,BcDNA:SD07008	22	0.134969	14	C	T	C	1.32798e-06	0.209331	143	174.475	181.928	-0.0280938	0.00556018	-0.883599	0.00361542	0.00149423	2.72817e-06	0.320249	143	189.909	196.494	-0.0244751	0.00500662	-3.98794	0.00419753	7.78132e-05
CS	2L	19715501	scw	FBgn0005590	14466	intergenic	FBgn0002053,FBgn0003343,FBgn0046219,FBgn0051695,Scw,l(2)37Ff,CG31695,l(2)IG76,BcDNA:LD30945,Screw,SCW	22	0.134969	14	C	T	C	1.32798e-06	0.209331	143	174.475	181.928	-0.0280938	0.00556018	-0.883599	0.00361542	0.00149423	2.72817e-06	0.320249	143	189.909	196.494	-0.0244751	0.00500662	-3.98794	0.00419753	7.78132e-05
CS	2L	19715501	Lar	FBgn0000464	Lar-in	intronic	FBgn0010057,bypass,Dlar,LAR,DLAR,dlar,DLar,CG10443,PTP38A,leukocyte-antigen-related-like,LAR receptor tyrosine phosphatase	22	0.134969	14	C	T	C	1.32798e-06	0.209331	143	174.475	181.928	-0.0280938	0.00556018	-0.883599	0.00361542	0.00149423	2.72817e-06	0.320249	143	189.909	196.494	-0.0244751	0.00500662	-3.98794	0.00419753	7.78132e-05
CS	2L	19715501	Lar	FBgn0000464	Lar-in	intronic	FBgn0010057,bypass,Dlar,LAR,DLAR,dlar,DLar,CG10443,PTP38A,leukocyte-antigen-related-like,LAR receptor tyrosine phosphatase	22	0.134969	14	C	T	C	1.32798e-06	0.209331	143	174.475	181.928	-0.0280938	0.00556018	-0.883599	0.00361542	0.00149423	2.72817e-06	0.320249	143	189.909	196.494	-0.0244751	0.00500662	-3.98794	0.00419753	7.78132e-05
CS	2L	19715538	CG10462	FBgn0032815	-16542	intergenic	FBgn0062418,CG10462-RA,CG10462-PA,BcDNA:SD07008	19	0.115854	10	T	A	T	5.20353e-06	0.252321	143	174.475	180.617	-0.0263603	0.00556323	-0.883599	0.00361542	0.00149423	2.71715e-05	0.560466	143	189.909	194.335	-0.0218079	0.00502658	-3.98794	0.00419753	7.78132e-05
CS	2L	19715538	scw	FBgn0005590	14503	intergenic	FBgn0002053,FBgn0003343,FBgn0046219,FBgn0051695,Scw,l(2)37Ff,CG31695,l(2)IG76,BcDNA:LD30945,Screw,SCW	19	0.115854	10	T	A	T	5.20353e-06	0.252321	143	174.475	180.617	-0.0263603	0.00556323	-0.883599	0.00361542	0.00149423	2.71715e-05	0.560466	143	189.909	194.335	-0.0218079	0.00502658	-3.98794	0.00419753	7.78132e-05
CS	2L	19715538	Lar	FBgn0000464	Lar-in	intronic	FBgn0010057,bypass,Dlar,LAR,DLAR,dlar,DLar,CG10443,PTP38A,leukocyte-antigen-related-like,LAR receptor tyrosine phosphatase	19	0.115854	10	T	A	T	5.20353e-06	0.252321	143	174.475	180.617	-0.0263603	0.00556323	-0.883599	0.00361542	0.00149423	2.71715e-05	0.560466	143	189.909	194.335	-0.0218079	0.00502658	-3.98794	0.00419753	7.78132e-05
CS	2R	3599792	CG1942		-336	intergenic		18	0.113208	8	G	A	A	0.000288219	0.588713	143	174.475	176.778	-0.0223887	0.00602062	-0.883599	0.00361542	0.00149423	3.74106e-06	0.320249	143	189.909	196.06	-0.0255324	0.00530216	-3.98794	0.00419753	7.78132e-05
CS	2R	3599792	CG1941		298	intergenic		18	0.113208	8	G	A	A	0.000288219	0.588713	143	174.475	176.778	-0.0223887	0.00602062	-0.883599	0.00361542	0.00149423	3.74106e-06	0.320249	143	189.909	196.06	-0.0255324	0.00530216	-3.98794	0.00419753	7.78132e-05
CS	2R	4956241	ana	FBgn0011746	-365	intergenic	med,medullaless,CG8084	20	0.121951	9	T	G	T	0.000269715	0.585664	143	174.475	176.862	0.0220866	0.00591015	-0.883599	0.00361542	0.00149423	4.9745e-06	0.386237	143	189.909	195.835	0.024824	0.00522733	-3.98794	0.00419753	7.78132e-05
CS	2R	4956241	CG8197	FBgn0033369	6812	intergenic		20	0.121951	9	T	G	T	0.000269715	0.585664	143	174.475	176.862	0.0220866	0.00591015	-0.883599	0.00361542	0.00149423	4.9745e-06	0.386237	143	189.909	195.835	0.024824	0.00522733	-3.98794	0.00419753	7.78132e-05
CS	2R	9134428	Mp20		Mp20:2	missense	FBgn0003740,FBgn0026854,DMMP20,Dmmp20,CG4696,mp20,myophilin,Tpn,Muscle protein 20 kd,muscle protein 20	46	0.282209	15	G	A	A	4.17212e-06	0.229456	143	174.475	180.873	-0.0269066	0.00561718	-0.883599	0.00361542	0.00149423	2.91625e-05	0.560466	143	189.909	194.375	-0.0220127	0.00509451	-3.98794	0.00419753	7.78132e-05
CS	2R	10837352	aPKC	FBgn0261854	aPKC-in	intronic	CG10261,FBgn0022131,FBgn0033986,CG30475,FBgn0260478,FBgn0050475,CG42783,aPKCzeta,DaPKC,aPKC-zeta,dapkc,pschur,psu,apkc,pkc-3,CG10261,l(2)k06403,PKCl%2Ci,Atypical PKC,atypical-Protein Kinase C,daPKC,a-PKC,atypical PKC,atypical protein kinase C zeta,atypical Protein kinase C,atypical Protein Kinase C,Atypical protein kinase C,PKCzeta,2R-69-30,2R-141-24,2R-265-2,2R-417-13,CG30475	56	0.347826	20	G	A	A	5.0885e-06	0.252321	143	174.475	180.671	-0.0267325	0.00563553	-0.883599	0.00361542	0.00149423	3.59275e-05	0.560466	143	189.909	193.983	-0.0219775	0.00514877	-3.98794	0.00419753	7.78132e-05
CS	2R	11177864	Trpm	FBgn0083959	Trpm-in	intronic	CG30078,FBan0030079,CG30079,FBgn0034006,FBgn0050078,FBgn0050079,FBgn0064975,CG30079,CG30078,TrpM,TRPM,CG16805,BcDNA:GH04950,CG34123,trpm,dTRPM	29	0.177914	17	A	G	A	7.9421e-07	0.209331	143	174.475	182.494	-0.0283034	0.00547685	-0.883599	0.00361542	0.00149423	1.81957e-05	0.520797	143	189.909	194.805	-0.0222504	0.00501393	-3.98794	0.00419753	7.78132e-05
CS	2R	11575928	Cep89	FBgn0034037	Cep89:2	missense		19	0.113095	15	T	C	T	6.16451e-06	0.258374	143	174.475	180.557	-0.0269761	0.00574161	-0.883599	0.00361542	0.00149423	4.74459e-07	0.166049	143	189.909	198.374	-0.027235	0.00515652	-3.98794	0.00419753	7.78132e-05
CS	2R	11724908	CG8249		-6687	intergenic		44	0.27673	8	T	C	C	5.83827e-06	0.256872	143	174.475	180.619	-0.0273249	0.0058	-0.883599	0.00361542	0.00149423	1.53249e-05	0.520797	143	189.909	194.994	-0.0235083	0.0052477	-3.98794	0.00419753	7.78132e-05
CS	2R	11724908	Poxn		2628	intergenic	poxn,pox-neuro,pox neuro,pox-neural,Pox-n,neuro,pox-n,P4,Pox-neuro,Paired box neural,CG8246,Paired box-neuro,PoxN	44	0.27673	8	T	C	C	5.83827e-06	0.256872	143	174.475	180.619	-0.0273249	0.0058	-0.883599	0.00361542	0.00149423	1.53249e-05	0.520797	143	189.909	194.994	-0.0235083	0.0052477	-3.98794	0.00419753	7.78132e-05
CS	2R	12116819	CG15706		CG15706-in	synonymous		27	0.164634	20	A	G	A	1.89038e-06	0.209331	143	174.475	181.374	-0.0273417	0.00549846	-0.883599	0.00361542	0.00149423	2.44638e-06	0.320249	143	189.909	196.257	-0.0242966	0.00494474	-3.98794	0.00419753	7.78132e-05
CS	2R	12116819	Tsf3		Tsf3-cds	synonymous	CG3666	27	0.164634	20	A	G	A	1.89038e-06	0.209331	143	174.475	181.374	-0.0273417	0.00549846	-0.883599	0.00361542	0.00149423	2.44638e-06	0.320249	143	189.909	196.257	-0.0242966	0.00494474	-3.98794	0.00419753	7.78132e-05
CS	2R	12696827	CG5550		-7269	intergenic	Fibrinogen-like,FBpp0086184,Fibrinogen-related protein	33	0.203704	12	C	A	C	2.94031e-06	0.215613	143	174.475	181.264	-0.0278393	0.00571498	-0.883599	0.00361542	0.00149423	0.000598731	0.804516	143	189.909	191.542	-0.0186817	0.00532002	-3.98794	0.00419753	7.78132e-05
CS	2R	12696827	CG15615	FBgn0034159	12915	intergenic		33	0.203704	12	C	A	C	2.94031e-06	0.215613	143	174.475	181.264	-0.0278393	0.00571498	-0.883599	0.00361542	0.00149423	0.000598731	0.804516	143	189.909	191.542	-0.0186817	0.00532002	-3.98794	0.00419753	7.78132e-05
CS	2R	12994951	CG30456	FBgn0050456	CG30456-u3	UTR	FBgn0034192,FBgn0034193,CG15612,CG15613	14	0.0843373	14	A	G	A	6.45587e-07	0.209331	143	174.475	182.298	-0.0276901	0.00531093	-0.883599	0.00361542	0.00149423	1.81266e-05	0.520797	143	189.909	194.784	-0.0215755	0.00486083	-3.98794	0.00419753	7.78132e-05
CS	2R	12995014	CG30456	FBgn0050456	CG30456-u3	UTR	FBgn0034192,FBgn0034193,CG15612,CG15613	10	0.0613497	10	T	C	T	8.65166e-06	0.30415	143	174.475	180.176	-0.0259691	0.00562372	-0.883599	0.00361542	0.00149423	1.4196e-05	0.520797	143	189.909	195.021	-0.0230385	0.00512153	-3.98794	0.00419753	7.78132e-05
CS	2R	12995036	CG30456	FBgn0050456	CG30456-u3	UTR	FBgn0034192,FBgn0034193,CG15612,CG15613	13	0.0822785	9	T	A	T	9.02563e-06	0.30415	143	174.475	180.169	-0.0259307	0.00562774	-0.883599	0.00361542	0.00149423	6.63149e-05	0.626435	143	189.909	193.542	-0.021107	0.00513302	-3.98794	0.00419753	7.78132e-05
CS	2R	17725920	CG4372		CG4372-PA	synonymous		13	0.0787879	19	C	T	C	6.56411e-06	0.262552	143	174.475	180.491	-0.0273896	0.0058481	-0.883599	0.00361542	0.00149423	0.000105301	0.647526	143	189.909	193.173	-0.0218491	0.00547435	-3.98794	0.00419753	7.78132e-05
CS	2R	17786779	CG13488	FBgn0034670	-52417	intergenic		11	0.0674847	11	T	C	T	1.74629e-06	0.209331	143	174.475	181.747	-0.0277828	0.00556697	-0.883599	0.00361542	0.00149423	0.00126557	0.823269	143	189.909	190.837	-0.0174448	0.00530237	-3.98794	0.00419753	7.78132e-05
CS	2R	17786779	PpN58A		16741	intergenic	PpN-58A,DmPpN-58A,PPN 58A,CG3245,PPN	11	0.0674847	11	T	C	T	1.74629e-06	0.209331	143	174.475	181.747	-0.0277828	0.00556697	-0.883599	0.00361542	0.00149423	0.00126557	0.823269	143	189.909	190.837	-0.0174448	0.00530237	-3.98794	0.00419753	7.78132e-05
CS	2R	17786779	Fili	FBgn0085397	Fili-in	intronic	CG4054,CG13487,CG4045,FBgn0034669,FBgn0034668,CG34368,CT32855,CG13487,Fish-lips,CT13464,CG4054	11	0.0674847	11	T	C	T	1.74629e-06	0.209331	143	174.475	181.747	-0.0277828	0.00556697	-0.883599	0.00361542	0.00149423	0.00126557	0.823269	143	189.909	190.837	-0.0174448	0.00530237	-3.98794	0.00419753	7.78132e-05
CS	2R	17894354	CG34370	FBgn0085399	CG34370-in	intronic	CG34004,FBgn0082869,FBgn0034680,FBgn0050405,FBgn0054004,FBgn0034678,FBgn0034679,FBgn0050408,FBgn0053227,CG33227,CG13499,CG13499,tld-like,CT32866,CG13498,CG13497,CG30408,CG30405,CG33227,unnamed,BP1037,CG34004	31	0.190184	16	A	G	A	1.53242e-05	0.317509	143	174.475	179.495	-0.0250057	0.00558196	-0.883599	0.00361542	0.00149423	1.40084e-07	0.166049	143	189.909	199.023	-0.0269854	0.00486618	-3.98794	0.00419753	7.78132e-05
CS	3L	794541	CG13898	FBgn0035161	-8886	intergenic		34	0.203593	11	C	G	C	6.89089e-05	0.457062	143	174.475	178.194	-0.022973	0.00560034	-0.883599	0.00361542	0.00149423	7.23969e-06	0.479916	143	189.909	195.674	-0.0228138	0.00489539	-3.98794	0.00419753	7.78132e-05
CS	3L	794541	tRNA:CR32481		24079	intergenic		34	0.203593	11	C	G	C	6.89089e-05	0.457062	143	174.475	178.194	-0.022973	0.00560034	-0.883599	0.00361542	0.00149423	7.23969e-06	0.479916	143	189.909	195.674	-0.0228138	0.00489539	-3.98794	0.00419753	7.78132e-05
CS	3L	3207062	CG32270	FBgn0052270	CG32270-u3	synonymous	CG33161,FBgn0035419,FBgn0053161,FBtr0073100,FBpp0072962,FBtr0073101,FBpp0072963,SP124,CG33161,CG11530	22	0.131737	10	C	A	C	3.21258e-06	0.217108	143	174.475	181.158	-0.0274114	0.0056509	-0.883599	0.00361542	0.00149423	8.73528e-05	0.641837	143	189.909	193.299	-0.0211627	0.00523789	-3.98794	0.00419753	7.78132e-05
CS	3L	3207062	gry		gry-in	synonymous	CG17569,Gryzun	22	0.131737	10	C	A	C	3.21258e-06	0.217108	143	174.475	181.158	-0.0274114	0.0056509	-0.883599	0.00361542	0.00149423	8.73528e-05	0.641837	143	189.909	193.299	-0.0211627	0.00523789	-3.98794	0.00419753	7.78132e-05
CS	3L	3207062	CG32269		CG32269-PA	synonymous	CG33161,FBgn0035419,FBgn0053161,FBtr0073100,FBpp0072962,FBtr0073101,FBpp0072963,SP124,CG33161,CG11530	22	0.131737	10	C	A	C	3.21258e-06	0.217108	143	174.475	181.158	-0.0274114	0.0056509	-0.883599	0.00361542	0.00149423	8.73528e-05	0.641837	143	189.909	193.299	-0.0211627	0.00523789	-3.98794	0.00419753	7.78132e-05
CS	3L	4817350	Dhc64C	FBgn0010349	Dhc64C:8	nonsense	FBgn0010349,FBgn0001059,FBgn0003565,Dhc,dynein heavy chain,dynein,Cytoplasmic dynein,cytoplasmic dynein,cytoplasmic dynenin,cytoplasmic dynein heavy chain,dhc,dhc64C,Dhc64,DHC,Dhc64c,cDhc,DHC64C,CG7507,Laborc,CD,cDhc64C,Cdhc,Fs(3)Lab,HMW MAP,Lab,Fs(3)Laborc,Female sterile(3)Laborc,Cytoplasmic dynein heavy chain,l(3)64Ca,Fs(3)Sz18,Dynein heavy chain,dynein heavy chain 64C,cytoplasmic Dynein heavy …	28	0.167665	18	G	A	G	4.20575e-07	0.209331	143	174.475	182.056	-0.0289373	0.00545157	-0.883599	0.00361542	0.00149423	1.69398e-06	0.279494	143	189.909	196.301	-0.025437	0.00508989	-3.98794	0.00419753	7.78132e-05
CS	3L	7611943	CG33275	FBgn0035802	CG33275-in	intronic	FBgn0035801,FBgn0035803,FBgn0035804,FBgn0053167,FBgn0053275,CG7515,CG33167,CG7520,CG7511,CG7513	14	0.0838323	15	G	A	G	1.09531e-06	0.209331	143	174.475	182.169	-0.0281901	0.0055318	-0.883599	0.00361542	0.00149423	4.83504e-05	0.596234	143	189.909	193.871	-0.021677	0.00516959	-3.98794	0.00419753	7.78132e-05
CS	3L	10756244	CG12523		-38048	intergenic	FBgn0062974,BcDNA:RE74758	35	0.214724	9	A	G	A	2.7779e-06	0.215613	143	174.475	181.27	-0.0278641	0.00570471	-0.883599	0.00361542	0.00149423	7.47294e-05	0.641837	143	189.909	193.498	-0.0213201	0.0052242	-3.98794	0.00419753	7.78132e-05
CS	3L	10756244	NijA	FBgn0036101	66270	intergenic	FBgn0062835,CG6449,ninA,ninjurin A,Ninjurin A,NijA	35	0.214724	9	A	G	A	2.7779e-06	0.215613	143	174.475	181.27	-0.0278641	0.00570471	-0.883599	0.00361542	0.00149423	7.47294e-05	0.641837	143	189.909	193.498	-0.0213201	0.0052242	-3.98794	0.00419753	7.78132e-05
CS	3L	11599845	CG6091	FBgn0036180	CG6091:5	synonymous	ped	25	0.153374	15	T	C	T	1.43097e-07	0.188879	143	174.475	183.781	-0.0298051	0.00537905	-0.883599	0.00361542	0.00149423	3.50388e-05	0.560466	143	189.909	194.178	-0.0213597	0.00499665	-3.98794	0.00419753	7.78132e-05
CS	3L	14057292	CG32138	FBgn0052138	CG32138-in	intronic	FBgn0036407,FBgn0036408,FBgn0046339,CG6807,anon-WO0172774.98,CG13485	15	0.0925926	15	C	T	C	9.31926e-06	0.30415	143	174.475	180.115	-0.0252599	0.00549129	-0.883599	0.00361542	0.00149423	0.0011427	0.823269	143	189.909	190.841	-0.0165841	0.0049939	-3.98794	0.00419753	7.78132e-05
CS	3L	14489486	bbg	FBgn0087007	bbg-in	intronic	FBgn0036425,CG9598,FBgn0036424,FBgn0024488,FBan0009598,CG9587,CG9587,CG9598,BBG,C96,CG42230	54	0.329268	12	C	A	A	0.000426322	0.621044	143	174.475	176.369	-0.0207681	0.00575478	-0.883599	0.00361542	0.00149423	3.88199e-06	0.320249	143	189.909	196.169	-0.0243515	0.005066	-3.98794	0.00419753	7.78132e-05
CS	3L	14489495	bbg	FBgn0087007	bbg-in	intronic	FBgn0036425,CG9598,FBgn0036424,FBgn0024488,FBan0009598,CG9587,CG9587,CG9598,BBG,C96,CG42230	54	0.331288	11	A	G	G	0.000426322	0.621044	143	174.475	176.369	-0.0207681	0.00575478	-0.883599	0.00361542	0.00149423	3.88199e-06	0.320249	143	189.909	196.169	-0.0243515	0.005066	-3.98794	0.00419753	7.78132e-05
CS	3L	14489497	bbg	FBgn0087007	bbg-in	intronic	FBgn0036425,CG9598,FBgn0036424,FBgn0024488,FBan0009598,CG9587,CG9587,CG9598,BBG,C96,CG42230	53	0.339744	10	A	T	T	0.000438864	0.623792	143	174.475	176.399	-0.0208189	0.00578205	-0.883599	0.00361542	0.00149423	3.73707e-06	0.320249	143	189.909	196.26	-0.0243769	0.00506195	-3.98794	0.00419753	7.78132e-05
CS	3L	14813948	CG17839	FBgn0036454	CG17839-in	intronic	CT39634	64	0.392638	16	A	G	G	1.75738e-06	0.209331	143	174.475	181.741	0.0277667	0.00556534	-0.883599	0.00361542	0.00149423	1.07131e-06	0.202009	143	189.909	197.553	0.0255637	0.00501153	-3.98794	0.00419753	7.78132e-05
CS	3L	15483312	CG12355	FBgn0040805	-2752	intergenic	unnamed	15	0.103448	7	A	G	A	0.0031203	0.798048	143	174.475	174.508	0.0177513	0.00590241	-0.883599	0.00361542	0.00149423	3.49404e-06	0.320249	143	189.909	195.255	0.024572	0.00508596	-3.98794	0.00419753	7.78132e-05
CS	3L	15483312	ran-like		4810	intergenic	FBgn0044729,FBgn0047302,CG7815,BcDNA:GH25818,anon-WO0140519.150,Ran-like	15	0.103448	7	A	G	A	0.0031203	0.798048	143	174.475	174.508	0.0177513	0.00590241	-0.883599	0.00361542	0.00149423	3.49404e-06	0.320249	143	189.909	195.255	0.024572	0.00508596	-3.98794	0.00419753	7.78132e-05
CS	3L	16202334	CG13073		-3817	intergenic		37	0.23125	11	T	A	A	0.000148574	0.527997	143	174.475	177.514	0.0228448	0.00585836	-0.883599	0.00361542	0.00149423	7.2718e-06	0.479916	143	189.909	195.738	0.0243595	0.00522825	-3.98794	0.00419753	7.78132e-05
CS	3L	16202334	CG33690		7202	intergenic		37	0.23125	11	T	A	A	0.000148574	0.527997	143	174.475	177.514	0.0228448	0.00585836	-0.883599	0.00361542	0.00149423	7.2718e-06	0.479916	143	189.909	195.738	0.0243595	0.00522825	-3.98794	0.00419753	7.78132e-05
CS	3L	16983394	Exn	FBgn0261547	Exn-in	intronic	CG3799,FBgn0027593,FBgn0036683,CG14060,CG42665,CG14060,CG3799,BcDNA:GH03693,exn,ephexin	56	0.35443	13	A	C	C	3.73296e-06	0.229456	143	174.475	180.307	-0.027042	0.00561507	-0.883599	0.00361542	0.00149423	0.000218286	0.731731	143	189.909	191.915	-0.0199397	0.00525382	-3.98794	0.00419753	7.78132e-05
CS	3L	18096649	CG13698		CG13698-in	intronic		9	0.0538922	17	A	T	A	9.81085e-06	0.30415	143	174.475	179.687	-0.025081	0.00546706	-0.883599	0.00361542	0.00149423	7.91271e-05	0.641837	143	189.909	193.391	-0.020171	0.00496073	-3.98794	0.00419753	7.78132e-05
CS	3R	4304547	Or85b		-31252	intergenic	85b,DOR115,85A.1,CG11735	29	0.18239	13	A	G	A	5.35252e-06	0.252321	143	174.475	180.54	-0.0273301	0.00577599	-0.883599	0.00361542	0.00149423	0.000353925	0.766658	143	189.909	191.677	-0.0197294	0.00538856	-3.98794	0.00419753	7.78132e-05
CS	3R	4304547	Obp85a		58228	intergenic	CG11732	29	0.18239	13	A	G	A	5.35252e-06	0.252321	143	174.475	180.54	-0.0273301	0.00577599	-0.883599	0.00361542	0.00149423	0.000353925	0.766658	143	189.909	191.677	-0.0197294	0.00538856	-3.98794	0.00419753	7.78132e-05
CS	3R	5145048	CG8861	FBgn0037676	CG8861-in	intronic		21	0.13125	13	G	A	G	3.89158e-06	0.229456	143	174.475	180.93	-0.0275568	0.00573349	-0.883599	0.00361542	0.00149423	0.000268314	0.731731	143	189.909	192.297	-0.01984	0.00530694	-3.98794	0.00419753	7.78132e-05
CS	3R	6253276	Cyp12e1	FBgn0037817	-7235	intergenic	12e1,CG14680	59	0.375796	14	A	G	G	2.54623e-06	0.211669	143	174.475	181.041	0.0281224	0.00573408	-0.883599	0.00361542	0.00149423	0.000139116	0.699126	143	189.909	192.914	0.0206473	0.005271	-3.98794	0.00419753	7.78132e-05
CS	3R	6253276	CG6345		11510	intergenic	149631_at	59	0.375796	14	A	G	G	2.54623e-06	0.211669	143	174.475	181.041	0.0281224	0.00573408	-0.883599	0.00361542	0.00149423	0.000139116	0.699126	143	189.909	192.914	0.0206473	0.005271	-3.98794	0.00419753	7.78132e-05
CS	3R	6253307	Cyp12e1	FBgn0037817	-7204	intergenic	12e1,CG14680	57	0.365385	15	T	G	G	7.0315e-06	0.272975	143	174.475	180.075	0.0272502	0.00583868	-0.883599	0.00361542	0.00149423	0.000193286	0.724334	143	189.909	192.614	0.020451	0.00534186	-3.98794	0.00419753	7.78132e-05
CS	3R	6253307	CG6345		11541	intergenic	149631_at	57	0.365385	15	T	G	G	7.0315e-06	0.272975	143	174.475	180.075	0.0272502	0.00583868	-0.883599	0.00361542	0.00149423	0.000193286	0.724334	143	189.909	192.614	0.020451	0.00534186	-3.98794	0.00419753	7.78132e-05
CS	3R	20396321	CG13624	FBgn0039209	CG13624-in	intronic	FBgn0045886,anon-WO0153538.65	21	0.127273	16	T	A	T	1.9031e-06	0.209331	143	174.475	181.635	-0.0282911	0.00569113	-0.883599	0.00361542	0.00149423	0.00178052	0.844617	143	189.909	190.531	-0.0171191	0.00537446	-3.98794	0.00419753	7.78132e-05
CS	X	2926031	kirre	FBgn0028369	kirre-in	intergenic	FBgn0028745,Duf,duf,dumbfounded,Dumbfounded,DUF,Duf/Kirre,DUF/KIRRE,kin-of-irreC,CT12279,EG:163A10.1,CG3653,Dumbfounded/Kirre,Kirre,Kin of IrreC,kirre,Kin-of-irre,duf/kirre,kin of irregular-chiasm-C,Kin of irre	14	0.0833333	9	C	A	C	2.29408e-06	0.211669	143	174.475	181.408	-0.0270846	0.00549564	-0.883599	0.00361542	0.00149423	4.75665e-05	0.596234	143	189.909	193.727	-0.0209621	0.00499413	-3.98794	0.00419753	7.78132e-05
CS	X	3154188	CG10793		-54589	intergenic	FBgn0024972,FBgn0029653,FBgn0029654,FBgn0029655,FBgn0052498,CG32498,PDE4,CG10797,CG10791,EG:140G11.4,EG:96G10.7,fs(1)M42,EG:BACN05I09.3,EG:BACN5I9.2,CG14267,CG14268,CG10792,Dunce,PDEII	78	0.46988	8	C	T	C	2.01723e-05	0.363366	143	174.475	179.372	0.0247955	0.00561959	-0.883599	0.00361542	0.00149423	1.07099e-06	0.202009	143	189.909	197.535	0.0250934	0.00491926	-3.98794	0.00419753	7.78132e-05
CS	X	3154188	Sgs4		9115	intergenic	Sgs-4,salivary gland secretion protein 4,sgs4,sgs-4,Sgs,CG12181,SGS-4,EG:96G10.6	78	0.46988	8	C	T	C	2.01723e-05	0.363366	143	174.475	179.372	0.0247955	0.00561959	-0.883599	0.00361542	0.00149423	1.07099e-06	0.202009	143	189.909	197.535	0.0250934	0.00491926	-3.98794	0.00419753	7.78132e-05
CS	X	3154188	dnc	FBgn0000479	dnc-in	intronic	FBgn0024972,FBgn0029653,FBgn0029654,FBgn0029655,FBgn0052498,CG32498,PDE4,CG10797,CG10791,EG:140G11.4,EG:96G10.7,fs(1)M42,EG:BACN05I09.3,EG:BACN5I9.2,CG14267,CG14268,CG10792,Dunce,PDEII	78	0.46988	8	C	T	C	2.01723e-05	0.363366	143	174.475	179.372	0.0247955	0.00561959	-0.883599	0.00361542	0.00149423	1.07099e-06	0.202009	143	189.909	197.535	0.0250934	0.00491926	-3.98794	0.00419753	7.78132e-05
CS	X	5810038	CG3011	FBgn0029823	CG3011-in	intronic	FBgn0066862,144561_at,anon-WO03040301.100	46	0.275449	16	T	C	T	1.36448e-06	0.209331	143	174.475	181.733	-0.0272173	0.00539324	-0.883599	0.00361542	0.00149423	1.71204e-05	0.520797	143	189.909	194.848	-0.0218257	0.00490175	-3.98794	0.00419753	7.78132e-05
CS	X	10868903	CG42339	FBgn0259241	CG42339-in	intronic	CG15204,CG12626,FBgn0040851,FBgn0030256,CG12626,CG15204	19	0.113772	15	A	G	A	3.28967e-06	0.217108	143	174.475	181.101	-0.0265037	0.00546996	-0.883599	0.00361542	0.00149423	0.000736869	0.80719	143	189.909	191.304	-0.0175935	0.00509787	-3.98794	0.00419753	7.78132e-05
CS	X	20868361	r-cup	FBgn0031142	-26056	intergenic	CG10998,ryder-cup	15	0.0909091	8	T	C	T	0.000135859	0.527997	143	174.475	177.532	-0.0220222	0.00561291	-0.883599	0.00361542	0.00149423	8.7787e-06	0.520797	143	189.909	195.334	-0.0229287	0.00496905	-3.98794	0.00419753	7.78132e-05
CS	X	20868361	CG11666	FBgn0040648	12085	intergenic		15	0.0909091	8	T	C	T	0.000135859	0.527997	143	174.475	177.532	-0.0220222	0.00561291	-0.883599	0.00361542	0.00149423	8.7787e-06	0.520797	143	189.909	195.334	-0.0229287	0.00496905	-3.98794	0.00419753	7.78132e-05
CS	X	20868531	r-cup	FBgn0031142	-25886	intergenic	CG10998,ryder-cup	15	0.0892857	9	G	T	G	0.000113872	0.498182	143	174.475	177.696	-0.0223463	0.00562813	-0.883599	0.00361542	0.00149423	7.2646e-06	0.479916	143	189.909	195.507	-0.0232248	0.00498445	-3.98794	0.00419753	7.78132e-05
CS	X	20868531	CG11666	FBgn0040648	12255	intergenic		15	0.0892857	9	G	T	G	0.000113872	0.498182	143	174.475	177.696	-0.0223463	0.00562813	-0.883599	0.00361542	0.00149423	7.2646e-06	0.479916	143	189.909	195.507	-0.0232248	0.00498445	-3.98794	0.00419753	7.78132e-05
CS	X	21171393	tRNA:CR32520		-4075	intergenic		16	0.0963855	12	G	C	G	5.27533e-06	0.252321	143	174.475	180.686	-0.0265955	0.0056167	-0.883599	0.00361542	0.00149423	5.34088e-05	0.611756	143	189.909	193.811	-0.0216762	0.00520097	-3.98794	0.00419753	7.78132e-05
CS	X	21171393	mir-1007		3917	intergenic	FBgn0250803,FBgn0262318,CR43025	16	0.0963855	12	G	C	G	5.27533e-06	0.252321	143	174.475	180.686	-0.0265955	0.0056167	-0.883599	0.00361542	0.00149423	5.34088e-05	0.611756	143	189.909	193.811	-0.0216762	0.00520097	-3.98794	0.00419753	7.78132e-05
CS	X	21171394	tRNA:CR32520		-4074	intergenic		15	0.0914634	13	C	A	C	9.51502e-06	0.30415	143	174.475	180.111	-0.0259499	0.0056474	-0.883599	0.00361542	0.00149423	5.45549e-05	0.611756	143	189.909	193.777	-0.0216979	0.00521297	-3.98794	0.00419753	7.78132e-05
CS	X	21171394	mir-1007		3918	intergenic	FBgn0250803,FBgn0262318,CR43025	15	0.0914634	13	C	A	C	9.51502e-06	0.30415	143	174.475	180.111	-0.0259499	0.0056474	-0.883599	0.00361542	0.00149423	5.45549e-05	0.611756	143	189.909	193.777	-0.0216979	0.00521297	-3.98794	0.00419753	7.78132e-05

## Sheet: CSIC
														FEMALES										MALES
Phenotype	Chromosome	Position	Gene Symbol	FlyBase ID	SNP Location	Site Class	Alias	Lines with minor allele	MAF	Mean Coverage	Major Allele	Minor Allele	Reference SNP	Pvalue	Qvalue	N	Null Log Likelihood	Alternative Log Likelihood	SNP Fixed effect	SNP Fixed effect SE	Null Log (σ2E/σ2G)	Null Genetic Variance (σ2G)	Null Residual Variance (σ2E)	Pvalue	Qvalue	N	Null Log Likelihood	Alternative Log Likelihood	SNP Fixed effect	SNP Fixed effect SE	Null Log (σ2E/σ2G)	Null Genetic Variance (σ2G)	Null Residual Variance (σ2E)
CSIC	2L	4697386	CG34351	FBgn0085380	CG34351-in	intronic	CG15633,FBgn0031625,FBgn0031624,CG11928,CG11928,CG15633	23	0.142857	15	T	C	C	0.000508212	0.660357	143	177.26	179.12	0.0207357	0.00582667	-0.168337	0.00261676	0.00221134	1.12561e-06	0.19938	143	193.548	201.021	0.0253022	0.00497108	-1.5383	0.0032628	0.00070067
CSIC	2L	8807137	CG42710		24643	intergenic	HDC01517	18	0.111801	16	T	C	T	3.13077e-07	0.162666	143	177.26	185.635	-0.0291843	0.00543223	-0.168337	0.00261676	0.00221134	3.38251e-05	0.425221	143	193.548	197.36	-0.021571	0.00503563	-1.5383	0.0032628	0.00070067
CSIC	2L	12923423	ACXA	FBgn0040510	ACXA-u3	synonymous	FBgn0004851,FBgn0032460,adenylyl cyclase,CG17176,AC,DACXA,AC62D,Ac62D,Adenylyl cyclase 62D	12	0.0736196	12	G	T	T	5.25074e-06	0.25863	143	177.26	183.462	-0.0263756	0.00556897	-0.168337	0.00261676	0.00221134	8.2433e-05	0.545834	143	193.548	197.001	-0.0207111	0.00510696	-1.5383	0.0032628	0.00070067
CSIC	2L	16239804	CG42817	FBgn0261999	CG42817-in	intronic	FBgn0028859,CG12455,FBan0012455,FBgn0032581,FBgn0044794,CG12455,DS07473.1A,BG:DS07473.1	36	0.229299	13	C	T	C	0.000186141	0.597296	143	177.26	180.051	-0.0221475	0.00576955	-0.168337	0.00261676	0.00221134	7.14502e-06	0.295571	143	193.548	199.326	-0.0235198	0.00504351	-1.5383	0.0032628	0.00070067
CSIC	2L	18908808	ssp3		-7717	intergenic	FBgn0032722,CG10666,CG18397,Ssp3	16	0.0993789	19	G	T	G	1.47132e-05	0.373722	143	177.26	182.463	-0.0251101	0.00559289	-0.168337	0.00261676	0.00221134	3.67445e-06	0.255265	143	193.548	199.97	-0.0240633	0.00499275	-1.5383	0.0032628	0.00070067
CSIC	2L	18908808	tup		27552	intergenic	FBgn0002017,FBgn0015395,CG10619,islet,Islet 1,Islet,isl,Isl,lethal(2)37Aa,l(2)E41,l(2)37Aa,tailup/islet,Tup,dIslet	16	0.0993789	19	G	T	G	1.47132e-05	0.373722	143	177.26	182.463	-0.0251101	0.00559289	-0.168337	0.00261676	0.00221134	3.67445e-06	0.255265	143	193.548	199.97	-0.0240633	0.00499275	-1.5383	0.0032628	0.00070067
CSIC	2L	19598303	Lar	FBgn0000464	-8266	intergenic	FBgn0010057,bypass,Dlar,LAR,DLAR,dlar,DLar,CG10443,PTP38A,leukocyte-antigen-related-like,LAR receptor tyrosine phosphatase	13	0.0797546	9	T	C	T	7.26368e-06	0.279091	143	177.26	183.137	-0.0255083	0.0054745	-0.168337	0.00261676	0.00221134	0.000465236	0.69199	143	193.548	195.366	-0.0181492	0.00506395	-1.5383	0.0032628	0.00070067
CSIC	2L	19598303	CG10366	FBgn0032814	11863	intergenic		13	0.0797546	9	T	C	T	7.26368e-06	0.279091	143	177.26	183.137	-0.0255083	0.0054745	-0.168337	0.00261676	0.00221134	0.000465236	0.69199	143	193.548	195.366	-0.0181492	0.00506395	-1.5383	0.0032628	0.00070067
CSIC	2L	19598307	Lar	FBgn0000464	-8262	intergenic	FBgn0010057,bypass,Dlar,LAR,DLAR,dlar,DLar,CG10443,PTP38A,leukocyte-antigen-related-like,LAR receptor tyrosine phosphatase	14	0.0853659	10	T	A	T	6.5185e-06	0.272661	143	177.26	183.246	-0.0257651	0.0054993	-0.168337	0.00261676	0.00221134	0.000444829	0.690885	143	193.548	195.416	-0.0183263	0.00509521	-1.5383	0.0032628	0.00070067
CSIC	2L	19598307	CG10366	FBgn0032814	11867	intergenic		14	0.0853659	10	T	A	T	6.5185e-06	0.272661	143	177.26	183.246	-0.0257651	0.0054993	-0.168337	0.00261676	0.00221134	0.000444829	0.690885	143	193.548	195.416	-0.0183263	0.00509521	-1.5383	0.0032628	0.00070067
CSIC	2L	19715501	CG10462	FBgn0032815	-16579	intergenic	FBgn0062418,CG10462-RA,CG10462-PA,BcDNA:SD07008	22	0.134969	14	C	T	C	4.63346e-07	0.162666	143	177.26	185.341	-0.0284907	0.00538896	-0.168337	0.00261676	0.00221134	1.20842e-06	0.19938	143	193.548	200.715	-0.0246659	0.00486131	-1.5383	0.0032628	0.00070067
CSIC	2L	19715501	scw	FBgn0005590	14466	intergenic	FBgn0002053,FBgn0003343,FBgn0046219,FBgn0051695,Scw,l(2)37Ff,CG31695,l(2)IG76,BcDNA:LD30945,Screw,SCW	22	0.134969	14	C	T	C	4.63346e-07	0.162666	143	177.26	185.341	-0.0284907	0.00538896	-0.168337	0.00261676	0.00221134	1.20842e-06	0.19938	143	193.548	200.715	-0.0246659	0.00486131	-1.5383	0.0032628	0.00070067
CSIC	2L	19715501	Lar	FBgn0000464	Lar-in	intronic	FBgn0010057,bypass,Dlar,LAR,DLAR,dlar,DLar,CG10443,PTP38A,leukocyte-antigen-related-like,LAR receptor tyrosine phosphatase	22	0.134969	14	C	T	C	4.63346e-07	0.162666	143	177.26	185.341	-0.0284907	0.00538896	-0.168337	0.00261676	0.00221134	1.20842e-06	0.19938	143	193.548	200.715	-0.0246659	0.00486131	-1.5383	0.0032628	0.00070067
CSIC	2L	19715538	CG10462	FBgn0032815	-16542	intergenic	FBgn0062418,CG10462-RA,CG10462-PA,BcDNA:SD07008	19	0.115854	10	T	A	T	2.02469e-06	0.203632	143	177.26	183.977	-0.0267926	0.00540506	-0.168337	0.00261676	0.00221134	1.51473e-05	0.337012	143	193.548	198.409	-0.0219803	0.00490351	-1.5383	0.0032628	0.00070067
CSIC	2L	19715538	scw	FBgn0005590	14503	intergenic	FBgn0002053,FBgn0003343,FBgn0046219,FBgn0051695,Scw,l(2)37Ff,CG31695,l(2)IG76,BcDNA:LD30945,Screw,SCW	19	0.115854	10	T	A	T	2.02469e-06	0.203632	143	177.26	183.977	-0.0267926	0.00540506	-0.168337	0.00261676	0.00221134	1.51473e-05	0.337012	143	193.548	198.409	-0.0219803	0.00490351	-1.5383	0.0032628	0.00070067
CSIC	2L	19715538	Lar	FBgn0000464	Lar-in	intronic	FBgn0010057,bypass,Dlar,LAR,DLAR,dlar,DLar,CG10443,PTP38A,leukocyte-antigen-related-like,LAR receptor tyrosine phosphatase	19	0.115854	10	T	A	T	2.02469e-06	0.203632	143	177.26	183.977	-0.0267926	0.00540506	-0.168337	0.00261676	0.00221134	1.51473e-05	0.337012	143	193.548	198.409	-0.0219803	0.00490351	-1.5383	0.0032628	0.00070067
CSIC	2R	2442463	jing	FBgn0086655	jing-in	intronic	FBgn0041145,FBan0009403,FBgn0010347,FBgn0010475,FBgn0026656,FBgn0033077,CG9403,1.28,CT9093,CG9397,deformed,CG9403,rhumba,l(2)01094,l(2)22F3	18	0.107143	12	C	A	C	1.55905e-05	0.37903	143	177.26	181.872	-0.0241677	0.00539997	-0.168337	0.00261676	0.00221134	9.60402e-06	0.295571	143	193.548	198.317	-0.0221313	0.00481872	-1.5383	0.0032628	0.00070067
CSIC	2R	4956241	ana	FBgn0011746	-365	intergenic	med,medullaless,CG8084	20	0.121951	9	T	G	T	0.000562944	0.673664	143	177.26	178.904	0.0203088	0.00575423	-0.168337	0.00261676	0.00221134	4.93275e-06	0.28241	143	193.548	198.887	0.0234512	0.0049362	-1.5383	0.0032628	0.00070067
CSIC	2R	4956241	CG8197	FBgn0033369	6812	intergenic		20	0.121951	9	T	G	T	0.000562944	0.673664	143	177.26	178.904	0.0203088	0.00575423	-0.168337	0.00261676	0.00221134	4.93275e-06	0.28241	143	193.548	198.887	0.0234512	0.0049362	-1.5383	0.0032628	0.00070067
CSIC	2R	5234075	Or45a		Or45a:2	synonymous	CG1978,45a,DOR58,45C.1	53	0.335443	15	G	T	T	6.26705e-06	0.272661	143	177.26	182.752	-0.0262302	0.00558747	-0.168337	0.00261676	0.00221134	1.53194e-05	0.337012	143	193.548	197.73	-0.022553	0.00503436	-1.5383	0.0032628	0.00070067
CSIC	2R	5234075	CG13739		CG13739-in	synonymous	FBgn0046789,BcDNA:GH21254	53	0.335443	15	G	T	T	6.26705e-06	0.272661	143	177.26	182.752	-0.0262302	0.00558747	-0.168337	0.00261676	0.00221134	1.53194e-05	0.337012	143	193.548	197.73	-0.022553	0.00503436	-1.5383	0.0032628	0.00070067
CSIC	2R	8137681	CG13168		-3816	intergenic		26	0.157576	14	A	C	A	4.64715e-05	0.440874	143	177.26	181.091	-0.0230187	0.00547637	-0.168337	0.00261676	0.00221134	8.48145e-06	0.295571	143	193.548	198.522	-0.0223842	0.00484242	-1.5383	0.0032628	0.00070067
CSIC	2R	8137681	CG13169		6903	intergenic		26	0.157576	14	A	C	A	4.64715e-05	0.440874	143	177.26	181.091	-0.0230187	0.00547637	-0.168337	0.00261676	0.00221134	8.48145e-06	0.295571	143	193.548	198.522	-0.0223842	0.00484242	-1.5383	0.0032628	0.00070067
CSIC	2R	10837352	aPKC	FBgn0261854	aPKC-in	intronic	CG10261,FBgn0022131,FBgn0033986,CG30475,FBgn0260478,FBgn0050475,CG42783,aPKCzeta,DaPKC,aPKC-zeta,dapkc,pschur,psu,apkc,pkc-3,CG10261,l(2)k06403,PKCl%2Ci,Atypical PKC,atypical-Protein Kinase C,daPKC,a-PKC,atypical PKC,atypical protein kinase C zeta,atypical Protein kinase C,atypical Protein Kinase C,Atypical protein kinase C,PKCzeta,2R-69-30,2R-141-24,2R-265-2,2R-417-13,CG30475	56	0.347826	20	G	A	A	4.94474e-06	0.25863	143	177.26	183.49	-0.0261653	0.00550816	-0.168337	0.00261676	0.00221134	2.57162e-05	0.410957	143	193.548	197.931	-0.0216811	0.00498163	-1.5383	0.0032628	0.00070067
CSIC	2R	11177864	Trpm	FBgn0083959	Trpm-in	intronic	CG30078,FBan0030079,CG30079,FBgn0034006,FBgn0050078,FBgn0050079,FBgn0064975,CG30079,CG30078,TrpM,TRPM,CG16805,BcDNA:GH04950,CG34123,trpm,dTRPM	29	0.177914	17	A	G	A	5.05086e-07	0.162666	143	177.26	185.69	-0.0281625	0.00534605	-0.168337	0.00261676	0.00221134	1.03647e-05	0.295571	143	193.548	198.876	-0.0223006	0.00487503	-1.5383	0.0032628	0.00070067
CSIC	2R	11575928	Cep89	FBgn0034037	Cep89:2	missense		19	0.113095	15	T	C	T	4.10308e-06	0.25863	143	177.26	183.702	-0.0266069	0.0055501	-0.168337	0.00261676	0.00221134	2.44737e-07	0.161519	143	193.548	202.613	-0.0267678	0.00493344	-1.5383	0.0032628	0.00070067
CSIC	2R	11576547	CG30090		-801	intergenic	FBgn0034038,FBgn0064961,SP41,CG8215,BcDNA:GH21666	26	0.161491	14	G	A	A	6.80609e-06	0.272661	143	177.26	183.179	-0.0259622	0.00555352	-0.168337	0.00261676	0.00221134	1.67142e-05	0.355835	143	193.548	198.45	-0.0223055	0.0050029	-1.5383	0.0032628	0.00070067
CSIC	2R	11576547	Cep89	FBgn0034037	57	intergenic	FBgn0034036,SP49,CG8212,CG33139,impbeta11,importin-beta11,ran-binding protein 11,imp-beta11	26	0.161491	14	G	A	A	6.80609e-06	0.272661	143	177.26	183.179	-0.0259622	0.00555352	-0.168337	0.00261676	0.00221134	1.67142e-05	0.355835	143	193.548	198.45	-0.0223055	0.0050029	-1.5383	0.0032628	0.00070067
CSIC	2R	11722955	CG8249		-8640	intergenic		29	0.180124	14	A	G	G	7.4005e-06	0.279091	143	177.26	182.701	-0.0256436	0.00550879	-0.168337	0.00261676	0.00221134	0.00145421	0.752088	143	193.548	194.128	-0.0165882	0.0051077	-1.5383	0.0032628	0.00070067
CSIC	2R	11722955	Poxn		675	intergenic	poxn,pox-neuro,pox neuro,pox-neural,Pox-n,neuro,pox-n,P4,Pox-neuro,Paired box neural,CG8246,Paired box-neuro,PoxN	29	0.180124	14	A	G	G	7.4005e-06	0.279091	143	177.26	182.701	-0.0256436	0.00550879	-0.168337	0.00261676	0.00221134	0.00145421	0.752088	143	193.548	194.128	-0.0165882	0.0051077	-1.5383	0.0032628	0.00070067
CSIC	2R	11724908	CG8249		-6687	intergenic		44	0.27673	8	T	C	C	5.68229e-06	0.25863	143	177.26	183.397	-0.0267912	0.005679	-0.168337	0.00261676	0.00221134	1.16443e-05	0.295571	143	193.548	198.899	-0.0232079	0.00510468	-1.5383	0.0032628	0.00070067
CSIC	2R	11724908	Poxn		2628	intergenic	poxn,pox-neuro,pox neuro,pox-neural,Pox-n,neuro,pox-n,P4,Pox-neuro,Paired box neural,CG8246,Paired box-neuro,PoxN	44	0.27673	8	T	C	C	5.68229e-06	0.25863	143	177.26	183.397	-0.0267912	0.005679	-0.168337	0.00261676	0.00221134	1.16443e-05	0.295571	143	193.548	198.899	-0.0232079	0.00510468	-1.5383	0.0032628	0.00070067
CSIC	2R	12116819	CG15706		CG15706-in	synonymous		27	0.164634	20	A	G	A	4.02126e-06	0.25863	143	177.26	183.643	-0.025966	0.00541111	-0.168337	0.00261676	0.00221134	3.38791e-06	0.255265	143	193.548	199.816	-0.0233468	0.00482523	-1.5383	0.0032628	0.00070067
CSIC	2R	12116819	Tsf3		Tsf3-cds	synonymous	CG3666	27	0.164634	20	A	G	A	4.02126e-06	0.25863	143	177.26	183.643	-0.025966	0.00541111	-0.168337	0.00261676	0.00221134	3.38791e-06	0.255265	143	193.548	199.816	-0.0233468	0.00482523	-1.5383	0.0032628	0.00070067
CSIC	2R	12994951	CG30456	FBgn0050456	CG30456-u3	UTR	FBgn0034192,FBgn0034193,CG15612,CG15613	14	0.0843373	14	A	G	A	1.24745e-06	0.164655	143	177.26	184.179	-0.0265934	0.00524858	-0.168337	0.00261676	0.00221134	3.01286e-05	0.419427	143	193.548	197.861	-0.0205625	0.0047679	-1.5383	0.0032628	0.00070067
CSIC	2R	17725920	CG4372		CG4372-PA	synonymous		13	0.0787879	19	C	T	C	2.46838e-06	0.203632	143	177.26	184.071	-0.0272655	0.00555127	-0.168337	0.00261676	0.00221134	4.68318e-05	0.459345	143	193.548	197.48	-0.0217818	0.00518452	-1.5383	0.0032628	0.00070067
CSIC	2R	17786779	CG13488	FBgn0034670	-52417	intergenic		11	0.0674847	11	T	C	T	9.85904e-07	0.162666	143	177.26	185.063	-0.0277154	0.0054136	-0.168337	0.00261676	0.00221134	0.000888492	0.724179	143	193.548	194.768	-0.0173774	0.00511698	-1.5383	0.0032628	0.00070067
CSIC	2R	17786779	PpN58A		16741	intergenic	PpN-58A,DmPpN-58A,PPN 58A,CG3245,PPN	11	0.0674847	11	T	C	T	9.85904e-07	0.162666	143	177.26	185.063	-0.0277154	0.0054136	-0.168337	0.00261676	0.00221134	0.000888492	0.724179	143	193.548	194.768	-0.0173774	0.00511698	-1.5383	0.0032628	0.00070067
CSIC	2R	17786779	Fili	FBgn0085397	Fili-in	intronic	CG4054,CG13487,CG4045,FBgn0034669,FBgn0034668,CG34368,CT32855,CG13487,Fish-lips,CT13464,CG4054	11	0.0674847	11	T	C	T	9.85904e-07	0.162666	143	177.26	185.063	-0.0277154	0.0054136	-0.168337	0.00261676	0.00221134	0.000888492	0.724179	143	193.548	194.768	-0.0173774	0.00511698	-1.5383	0.0032628	0.00070067
CSIC	2R	17894354	CG34370	FBgn0085399	CG34370-in	intronic	CG34004,FBgn0082869,FBgn0034680,FBgn0050405,FBgn0054004,FBgn0034678,FBgn0034679,FBgn0050408,FBgn0053227,CG33227,CG13499,CG13499,tld-like,CT32866,CG13498,CG13497,CG30408,CG30405,CG33227,unnamed,BP1037,CG34004	31	0.190184	16	A	G	A	2.49923e-05	0.400937	143	177.26	181.894	-0.0239016	0.00548287	-0.168337	0.00261676	0.00221134	1.71068e-07	0.161519	143	193.548	202.669	-0.0260602	0.0047358	-1.5383	0.0032628	0.00070067
CSIC	3L	712322	CG13897		-25355	intergenic	FBgn0061885,anon-WO0118547.557	67	0.41875	8	A	G	A	0.001012	0.712675	143	177.26	178.429	-0.018904	0.00563072	-0.168337	0.00261676	0.00221134	9.5875e-06	0.295571	143	193.548	198.977	-0.0224027	0.00487737	-1.5383	0.0032628	0.00070067
CSIC	3L	712322	CG13896	FBgn0035159	472	intergenic		67	0.41875	8	A	G	A	0.001012	0.712675	143	177.26	178.429	-0.018904	0.00563072	-0.168337	0.00261676	0.00221134	9.5875e-06	0.295571	143	193.548	198.977	-0.0224027	0.00487737	-1.5383	0.0032628	0.00070067
CSIC	3L	712337	CG13897		-25340	intergenic	FBgn0061885,anon-WO0118547.557	72	0.467532	9	G	T	G	0.0012083	0.723959	143	177.26	178.28	-0.018679	0.00565342	-0.168337	0.00261676	0.00221134	8.58772e-06	0.295571	143	193.548	199.113	-0.0225959	0.00489134	-1.5383	0.0032628	0.00070067
CSIC	3L	712337	CG13896	FBgn0035159	487	intergenic		72	0.467532	9	G	T	G	0.0012083	0.723959	143	177.26	178.28	-0.018679	0.00565342	-0.168337	0.00261676	0.00221134	8.58772e-06	0.295571	143	193.548	199.113	-0.0225959	0.00489134	-1.5383	0.0032628	0.00070067
CSIC	3L	712342	CG13897		-25335	intergenic	FBgn0061885,anon-WO0118547.557	69	0.45098	8	A	T	A	0.000751143	0.702596	143	177.26	178.696	-0.0191811	0.00556694	-0.168337	0.00261676	0.00221134	9.56692e-06	0.295571	143	193.548	198.964	-0.0222105	0.00483499	-1.5383	0.0032628	0.00070067
CSIC	3L	712342	CG13896	FBgn0035159	492	intergenic		69	0.45098	8	A	T	A	0.000751143	0.702596	143	177.26	178.696	-0.0191811	0.00556694	-0.168337	0.00261676	0.00221134	9.56692e-06	0.295571	143	193.548	198.964	-0.0222105	0.00483499	-1.5383	0.0032628	0.00070067
CSIC	3L	712399	CG13897		-25278	intergenic	FBgn0061885,anon-WO0118547.557	1	0.011236	2	A	T	A	0.000662361	0.68864	143	177.26	178.833	-0.0196076	0.00563068	-0.168337	0.00261676	0.00221134	6.41872e-06	0.28241	143	193.548	199.379	-0.0228973	0.0048834	-1.5383	0.0032628	0.00070067
CSIC	3L	712399	CG13896	FBgn0035159	549	intergenic		1	0.011236	2	A	T	A	0.000662361	0.68864	143	177.26	178.833	-0.0196076	0.00563068	-0.168337	0.00261676	0.00221134	6.41872e-06	0.28241	143	193.548	199.379	-0.0228973	0.0048834	-1.5383	0.0032628	0.00070067
CSIC	3L	712423	CG13897		-25254	intergenic	FBgn0061885,anon-WO0118547.557	70	0.440252	9	G	C	G	0.000557522	0.672663	143	177.26	179.012	-0.0202665	0.00573771	-0.168337	0.00261676	0.00221134	7.66962e-06	0.295571	143	193.548	199.164	-0.0231756	0.00498771	-1.5383	0.0032628	0.00070067
CSIC	3L	712423	CG13896	FBgn0035159	573	intergenic		70	0.440252	9	G	C	G	0.000557522	0.672663	143	177.26	179.012	-0.0202665	0.00573771	-0.168337	0.00261676	0.00221134	7.66962e-06	0.295571	143	193.548	199.164	-0.0231756	0.00498771	-1.5383	0.0032628	0.00070067
CSIC	3L	712455	CG13897		-25222	intergenic	FBgn0061885,anon-WO0118547.557	71	0.438272	11	C	T	C	0.000739015	0.702596	143	177.26	178.714	-0.0192786	0.0055875	-0.168337	0.00261676	0.00221134	8.03281e-06	0.295571	143	193.548	199.135	-0.0224726	0.00484792	-1.5383	0.0032628	0.00070067
CSIC	3L	712455	CG13896	FBgn0035159	605	intergenic		71	0.438272	11	C	T	C	0.000739015	0.702596	143	177.26	178.714	-0.0192786	0.0055875	-0.168337	0.00261676	0.00221134	8.03281e-06	0.295571	143	193.548	199.135	-0.0224726	0.00484792	-1.5383	0.0032628	0.00070067
CSIC	3L	794541	CG13898	FBgn0035161	-8886	intergenic		34	0.203593	11	C	G	C	4.30322e-05	0.437748	143	177.26	181.378	-0.0231846	0.00549029	-0.168337	0.00261676	0.00221134	3.63521e-06	0.255265	143	193.548	199.911	-0.0231313	0.00479689	-1.5383	0.0032628	0.00070067
CSIC	3L	794541	tRNA:CR32481		24079	intergenic		34	0.203593	11	C	G	C	4.30322e-05	0.437748	143	177.26	181.378	-0.0231846	0.00549029	-0.168337	0.00261676	0.00221134	3.63521e-06	0.255265	143	193.548	199.911	-0.0231313	0.00479689	-1.5383	0.0032628	0.00070067
CSIC	3L	4817350	Dhc64C	FBgn0010349	Dhc64C:8	nonsense	FBgn0010349,FBgn0001059,FBgn0003565,Dhc,dynein heavy chain,dynein,Cytoplasmic dynein,cytoplasmic dynein,cytoplasmic dynenin,cytoplasmic dynein heavy chain,dhc,dhc64C,Dhc64,DHC,Dhc64c,cDhc,DHC64C,CG7507,Laborc,CD,cDhc64C,Cdhc,Fs(3)Lab,HMW MAP,Lab,Fs(3)Laborc,Female sterile(3)Laborc,Cytoplasmic dynein heavy chain,l(3)64Ca,Fs(3)Sz18,Dynein heavy chain,dynein heavy chain 64C,cytoplasmic Dynein heavy …	28	0.167665	18	G	A	G	6.55371e-07	0.162666	143	177.26	184.898	-0.0278383	0.00534277	-0.168337	0.00261676	0.00221134	8.58138e-07	0.19938	143	193.548	200.52	-0.0247727	0.00480969	-1.5383	0.0032628	0.00070067
CSIC	3L	4843341	CG32237		-6094	intergenic	FBgn0035579,FBgn0035580,FBgn0063054,CG13706,CG13703,BcDNA:RE17910	16	0.0963855	10	C	A	A	7.58716e-05	0.494573	143	177.26	180.685	-0.0229319	0.00562457	-0.168337	0.00261676	0.00221134	4.18414e-06	0.25975	143	193.548	199.192	-0.0235895	0.00492538	-1.5383	0.0032628	0.00070067
CSIC	3L	4843341	CG13707		4599	intergenic		16	0.0963855	10	C	A	A	7.58716e-05	0.494573	143	177.26	180.685	-0.0229319	0.00562457	-0.168337	0.00261676	0.00221134	4.18414e-06	0.25975	143	193.548	199.192	-0.0235895	0.00492538	-1.5383	0.0032628	0.00070067
CSIC	3L	7611943	CG33275	FBgn0035802	CG33275-in	intronic	FBgn0035801,FBgn0035803,FBgn0035804,FBgn0053167,FBgn0053275,CG7515,CG33167,CG7520,CG7511,CG7513	14	0.0838323	15	G	A	G	3.78656e-06	0.25863	143	177.26	183.764	-0.0262484	0.00545404	-0.168337	0.00261676	0.00221134	0.000126008	0.611479	143	193.548	196.594	-0.0198493	0.00503334	-1.5383	0.0032628	0.00070067
CSIC	3L	10756244	CG12523		-38048	intergenic	FBgn0062974,BcDNA:RE74758	35	0.214724	9	A	G	A	2.10176e-06	0.203632	143	177.26	184.213	-0.0276268	0.00558296	-0.168337	0.00261676	0.00221134	4.77215e-05	0.459345	143	193.548	197.423	-0.0213215	0.00508076	-1.5383	0.0032628	0.00070067
CSIC	3L	10756244	NijA	FBgn0036101	66270	intergenic	FBgn0062835,CG6449,ninA,ninjurin A,Ninjurin A,NijA	35	0.214724	9	A	G	A	2.10176e-06	0.203632	143	177.26	184.213	-0.0276268	0.00558296	-0.168337	0.00261676	0.00221134	4.77215e-05	0.459345	143	193.548	197.423	-0.0213215	0.00508076	-1.5383	0.0032628	0.00070067
CSIC	3L	11599845	CG6091	FBgn0036180	CG6091:5	synonymous	ped	25	0.153374	15	T	C	T	1.28601e-07	0.162666	143	177.26	186.283	-0.029401	0.00528443	-0.168337	0.00261676	0.00221134	3.13778e-05	0.424597	143	193.548	197.783	-0.0209556	0.00487054	-1.5383	0.0032628	0.00070067
CSIC	3L	11613815	CG6084		CG6084-in	intronic	FBgn0036182,FBgn0017641,34F4T,ESTS:34F4T,Aldehyde reductase	41	0.25625	8	A	T	A	2.23869e-06	0.203632	143	177.26	183.734	-0.0271702	0.00550677	-0.168337	0.00261676	0.00221134	0.000244868	0.6563	143	193.548	195.524	-0.0193229	0.00513397	-1.5383	0.0032628	0.00070067
CSIC	3L	14489486	bbg	FBgn0087007	bbg-in	intronic	FBgn0036425,CG9598,FBgn0036424,FBgn0024488,FBan0009598,CG9587,CG9587,CG9598,BBG,C96,CG42230	54	0.329268	12	C	A	A	0.000397299	0.629522	143	177.26	179.258	-0.0203521	0.00560849	-0.168337	0.00261676	0.00221134	2.48131e-06	0.244448	143	193.548	200.27	-0.0240057	0.00488876	-1.5383	0.0032628	0.00070067
CSIC	3L	14489495	bbg	FBgn0087007	bbg-in	intronic	FBgn0036425,CG9598,FBgn0036424,FBgn0024488,FBan0009598,CG9587,CG9587,CG9598,BBG,C96,CG42230	54	0.331288	11	A	G	G	0.000397299	0.629522	143	177.26	179.258	-0.0203521	0.00560849	-0.168337	0.00261676	0.00221134	2.48131e-06	0.244448	143	193.548	200.27	-0.0240057	0.00488876	-1.5383	0.0032628	0.00070067
CSIC	3L	14489497	bbg	FBgn0087007	bbg-in	intronic	FBgn0036425,CG9598,FBgn0036424,FBgn0024488,FBan0009598,CG9587,CG9587,CG9598,BBG,C96,CG42230	53	0.339744	10	A	T	T	0.000274983	0.6149	143	177.26	179.604	-0.0209667	0.00561852	-0.168337	0.00261676	0.00221134	1.52245e-06	0.223282	143	193.548	200.754	-0.0245142	0.00488157	-1.5383	0.0032628	0.00070067
CSIC	3L	14813948	CG17839	FBgn0036454	CG17839-in	intronic	CT39634	64	0.392638	16	A	G	G	8.91988e-07	0.162666	143	177.26	185.16	0.0278771	0.00542149	-0.168337	0.00261676	0.00221134	3.96016e-07	0.174239	143	193.548	202.058	0.0258056	0.00484955	-1.5383	0.0032628	0.00070067
CSIC	3L	15483312	CG12355	FBgn0040805	-2752	intergenic	unnamed	15	0.103448	7	A	G	A	0.00357882	0.781537	143	177.26	177.16	0.0171176	0.00577742	-0.168337	0.00261676	0.00221134	1.98201e-06	0.244448	143	193.548	199.588	0.0243212	0.00490167	-1.5383	0.0032628	0.00070067
CSIC	3L	15483312	ran-like		4810	intergenic	FBgn0044729,FBgn0047302,CG7815,BcDNA:GH25818,anon-WO0140519.150,Ran-like	15	0.103448	7	A	G	A	0.00357882	0.781537	143	177.26	177.16	0.0171176	0.00577742	-0.168337	0.00261676	0.00221134	1.98201e-06	0.244448	143	193.548	199.588	0.0243212	0.00490167	-1.5383	0.0032628	0.00070067
CSIC	3L	16202321	CG13073		-3830	intergenic		37	0.226994	11	T	G	G	0.000190472	0.597296	143	177.26	180.043	0.0218965	0.00571346	-0.168337	0.00261676	0.00221134	9.10589e-06	0.295571	143	193.548	199.088	0.0235152	0.00510586	-1.5383	0.0032628	0.00070067
CSIC	3L	16202321	CG33690		7189	intergenic		37	0.226994	11	T	G	G	0.000190472	0.597296	143	177.26	180.043	0.0218965	0.00571346	-0.168337	0.00261676	0.00221134	9.10589e-06	0.295571	143	193.548	199.088	0.0235152	0.00510586	-1.5383	0.0032628	0.00070067
CSIC	3L	16202334	CG13073		-3817	intergenic		37	0.23125	11	T	A	A	0.000157461	0.582045	143	177.26	180.211	0.0221268	0.00569706	-0.168337	0.00261676	0.00221134	6.18084e-06	0.28241	143	193.548	199.422	0.0238917	0.00508579	-1.5383	0.0032628	0.00070067
CSIC	3L	16202334	CG33690		7202	intergenic		37	0.23125	11	T	A	A	0.000157461	0.582045	143	177.26	180.211	0.0221268	0.00569706	-0.168337	0.00261676	0.00221134	6.18084e-06	0.28241	143	193.548	199.422	0.0238917	0.00508579	-1.5383	0.0032628	0.00070067
CSIC	3L	16824644	TSG101	FBgn0036666	-10755	intergenic	FBgn0082594,erupted,ept,DmTSG101,Tsg101,CG9712,Erupted,dVps23,dTsg101,dTSg101,tsg101,CG9172,vps23,Tumor Susceptibility Gene-101	51	0.312883	13	G	A	A	9.71442e-05	0.502927	143	177.26	180.686	-0.0231521	0.00577009	-0.168337	0.00261676	0.00221134	4.08672e-06	0.25975	143	193.548	199.795	-0.0244522	0.00509964	-1.5383	0.0032628	0.00070067
CSIC	3L	16824644	CG13024	FBgn0036665	20677	intergenic	FBgn0062921,BcDNA:RH61817	51	0.312883	13	G	A	A	9.71442e-05	0.502927	143	177.26	180.686	-0.0231521	0.00577009	-0.168337	0.00261676	0.00221134	4.08672e-06	0.25975	143	193.548	199.795	-0.0244522	0.00509964	-1.5383	0.0032628	0.00070067
CSIC	3L	18096649	CG13698		CG13698-in	intronic		9	0.0538922	17	A	T	A	4.77937e-06	0.25863	143	177.26	182.777	-0.02545	0.00534859	-0.168337	0.00261676	0.00221134	3.613e-05	0.441104	143	193.548	197.636	-0.02054	0.00481361	-1.5383	0.0032628	0.00070067
CSIC	3L	18112916	CG7341		CG7341-u5	UTR		32	0.198758	18	C	A	A	5.24172e-06	0.25863	143	177.26	183.279	-0.0257467	0.0054357	-0.168337	0.00261676	0.00221134	9.40786e-05	0.569623	143	193.548	196.558	-0.019914	0.00495267	-1.5383	0.0032628	0.00070067
CSIC	3L	18113039	CG7341		CG7341-PB	synonymous		41	0.25625	18	A	C	C	5.4417e-06	0.25863	143	177.26	183.345	-0.0259486	0.00548854	-0.168337	0.00261676	0.00221134	4.32937e-06	0.25975	143	193.548	199.572	-0.0234179	0.00489769	-1.5383	0.0032628	0.00070067
CSIC	3R	5145048	CG8861	FBgn0037676	CG8861-in	intronic		21	0.13125	13	G	A	G	2.94382e-06	0.228568	143	177.26	184.025	-0.0270493	0.00555313	-0.168337	0.00261676	0.00221134	0.000206265	0.642841	143	193.548	196.118	-0.0196578	0.00515853	-1.5383	0.0032628	0.00070067
CSIC	3R	6253276	Cyp12e1	FBgn0037817	-7235	intergenic	12e1,CG14680	59	0.375796	14	A	G	G	4.8904e-06	0.25863	143	177.26	183.252	0.026866	0.00565258	-0.168337	0.00261676	0.00221134	0.000167921	0.637585	143	193.548	196.235	0.0199062	0.00514828	-1.5383	0.0032628	0.00070067
CSIC	3R	6253276	CG6345		11510	intergenic	149631_at	59	0.375796	14	A	G	G	4.8904e-06	0.25863	143	177.26	183.252	0.026866	0.00565258	-0.168337	0.00261676	0.00221134	0.000167921	0.637585	143	193.548	196.235	0.0199062	0.00514828	-1.5383	0.0032628	0.00070067
CSIC	3R	16709971	tRNA:CR31480		-6449	intergenic		65	0.401235	12	A	T	A	9.3341e-06	0.342234	143	177.26	182.957	-0.0268107	0.0058289	-0.168337	0.00261676	0.00221134	0.000200263	0.642841	143	193.548	196.208	-0.0205477	0.00538066	-1.5383	0.0032628	0.00070067
CSIC	3R	16709971	TotZ		5807	intergenic	FBgn0051507,tot,CG31507,Totz	65	0.401235	12	A	T	A	9.3341e-06	0.342234	143	177.26	182.957	-0.0268107	0.0058289	-0.168337	0.00261676	0.00221134	0.000200263	0.642841	143	193.548	196.208	-0.0205477	0.00538066	-1.5383	0.0032628	0.00070067
CSIC	3R	20396321	CG13624	FBgn0039209	CG13624-in	intronic	FBgn0045886,anon-WO0153538.65	21	0.127273	16	T	A	T	8.29903e-07	0.162666	143	177.26	185.241	-0.0283151	0.0054895	-0.168337	0.00261676	0.00221134	0.000900424	0.724179	143	193.548	194.732	-0.0174958	0.00515785	-1.5383	0.0032628	0.00070067
CSIC	3R	22416034	TwdlM		-28811	intergenic	CG5468	53	0.344156	21	A	G	G	0.000198609	0.597296	143	177.26	179.645	-0.0220903	0.00578121	-0.168337	0.00261676	0.00221134	7.51822e-06	0.295571	143	193.548	198.322	-0.0233693	0.00502426	-1.5383	0.0032628	0.00070067
CSIC	3R	22416034	CG31082		3511	intergenic	CG5462,FBgn0026178,FBgn0011401,FBgn0016016,FBgn0016937,FBgn0026234,FBgn0028155,FBgn0028975,FBgn0039432,FBgn0069188,CG5467,FBgn0039433,Scribble,Scrib,CG42614,scribble,smi97B,CG5462,ird15,SCR,gp150-like,CT17324,ird,vart,vartul,l(3)673,l(3)j7B3,l(3)S042405,immune response deficient 15,0424/05,smell impaired 97B,unnamed,lethal (3) c00119,l(3)c00119,Scrb,Scribbled,Scb,Scribbles,MENE (3R)-F,CG5467	53	0.344156	21	A	G	G	0.000198609	0.597296	143	177.26	179.645	-0.0220903	0.00578121	-0.168337	0.00261676	0.00221134	7.51822e-06	0.295571	143	193.548	198.322	-0.0233693	0.00502426	-1.5383	0.0032628	0.00070067
CSIC	3R	22416034	scrib	FBgn0261263	scrib-in	intronic	CG5462,FBgn0026178,FBgn0011401,FBgn0016016,FBgn0016937,FBgn0026234,FBgn0028155,FBgn0028975,FBgn0039432,FBgn0069188,CG5467,FBgn0039433,Scribble,Scrib,CG42614,scribble,smi97B,CG5462,ird15,SCR,gp150-like,CT17324,ird,vart,vartul,l(3)673,l(3)j7B3,l(3)S042405,immune response deficient 15,0424/05,smell impaired 97B,unnamed,lethal (3) c00119,l(3)c00119,Scrb,Scribbled,Scb,Scribbles,MENE (3R)-F,CG5467	53	0.344156	21	A	G	G	0.000198609	0.597296	143	177.26	179.645	-0.0220903	0.00578121	-0.168337	0.00261676	0.00221134	7.51822e-06	0.295571	143	193.548	198.322	-0.0233693	0.00502426	-1.5383	0.0032628	0.00070067
CSIC	X	2926031	kirre	FBgn0028369	kirre-in	intergenic	FBgn0028745,Duf,duf,dumbfounded,Dumbfounded,DUF,Duf/Kirre,DUF/KIRRE,kin-of-irreC,CT12279,EG:163A10.1,CG3653,Dumbfounded/Kirre,Kirre,Kin of IrreC,kirre,Kin-of-irre,duf/kirre,kin of irregular-chiasm-C,Kin of irre	14	0.0833333	9	C	A	C	5.52616e-06	0.25863	143	177.26	183.392	-0.0256039	0.00541979	-0.168337	0.00261676	0.00221134	8.58288e-05	0.550607	143	193.548	196.912	-0.0198263	0.00490154	-1.5383	0.0032628	0.00070067
CSIC	X	3154188	CG10793		-54589	intergenic	FBgn0024972,FBgn0029653,FBgn0029654,FBgn0029655,FBgn0052498,CG32498,PDE4,CG10797,CG10791,EG:140G11.4,EG:96G10.7,fs(1)M42,EG:BACN05I09.3,EG:BACN5I9.2,CG14267,CG14268,CG10792,Dunce,PDEII	78	0.46988	8	C	T	C	1.48678e-05	0.373722	143	177.26	182.451	0.0246918	0.00550284	-0.168337	0.00261676	0.00221134	6.65074e-07	0.19938	143	193.548	201.495	0.0249062	0.00478303	-1.5383	0.0032628	0.00070067
CSIC	X	3154188	Sgs4		9115	intergenic	Sgs-4,salivary gland secretion protein 4,sgs4,sgs-4,Sgs,CG12181,SGS-4,EG:96G10.6	78	0.46988	8	C	T	C	1.48678e-05	0.373722	143	177.26	182.451	0.0246918	0.00550284	-0.168337	0.00261676	0.00221134	6.65074e-07	0.19938	143	193.548	201.495	0.0249062	0.00478303	-1.5383	0.0032628	0.00070067
CSIC	X	3154188	dnc	FBgn0000479	dnc-in	intronic	FBgn0024972,FBgn0029653,FBgn0029654,FBgn0029655,FBgn0052498,CG32498,PDE4,CG10797,CG10791,EG:140G11.4,EG:96G10.7,fs(1)M42,EG:BACN05I09.3,EG:BACN5I9.2,CG14267,CG14268,CG10792,Dunce,PDEII	78	0.46988	8	C	T	C	1.48678e-05	0.373722	143	177.26	182.451	0.0246918	0.00550284	-0.168337	0.00261676	0.00221134	6.65074e-07	0.19938	143	193.548	201.495	0.0249062	0.00478303	-1.5383	0.0032628	0.00070067
CSIC	X	5810038	CG3011	FBgn0029823	CG3011-in	intronic	FBgn0066862,144561_at,anon-WO03040301.100	46	0.275449	16	T	C	T	1.23009e-06	0.164655	143	177.26	184.672	-0.0269083	0.00530743	-0.168337	0.00261676	0.00221134	1.11114e-05	0.295571	143	193.548	198.761	-0.0217292	0.00476758	-1.5383	0.0032628	0.00070067
CSIC	X	7067433	CG9650	FBgn0029939	-19676	intergenic		19	0.113095	14	A	C	A	0.000438801	0.649235	143	177.26	179.014	-0.020001	0.00555484	-0.168337	0.00261676	0.00221134	6.19769e-06	0.28241	143	193.548	199.365	-0.0229485	0.00488569	-1.5383	0.0032628	0.00070067
CSIC	X	7067433	CR32730		23550	intergenic	FBgn0052730,BcDNA:RE54930,MRE32,mRNA-like ncRNA in embryogenesis 3e	19	0.113095	14	A	C	A	0.000438801	0.649235	143	177.26	179.014	-0.020001	0.00555484	-0.168337	0.00261676	0.00221134	6.19769e-06	0.28241	143	193.548	199.365	-0.0229485	0.00488569	-1.5383	0.0032628	0.00070067
CSIC	X	10868903	CG42339	FBgn0259241	CG42339-in	intronic	CG15204,CG12626,FBgn0040851,FBgn0030256,CG12626,CG15204	19	0.113772	15	A	G	A	2.33551e-06	0.203632	143	177.26	184.19	-0.0263344	0.00534787	-0.168337	0.00261676	0.00221134	0.000548421	0.698834	143	193.548	195.191	-0.01751	0.00495068	-1.5383	0.0032628	0.00070067
CSIC	X	11320993	Gs2		Gs2-in	intronic	Glutamate-ammonia ligase,gs2,CG1743,GS2,cytoplasmic glutamine synthetase,gs-c,GsII	54	0.339623	5	G	A	G	2.29468e-05	0.400937	143	177.26	182.033	0.0245527	0.005605	-0.168337	0.00261676	0.00221134	5.23926e-06	0.28241	143	193.548	199.533	0.0235509	0.004972	-1.5383	0.0032628	0.00070067
CSIC	X	11321086	Gs2		Gs2-in	intronic	Glutamate-ammonia ligase,gs2,CG1743,GS2,cytoplasmic glutamine synthetase,gs-c,GsII	57	0.345455	7	T	C	T	2.47957e-05	0.400937	143	177.26	181.964	0.0241114	0.00552852	-0.168337	0.00261676	0.00221134	6.29008e-06	0.28241	143	193.548	199.446	0.0230292	0.00490653	-1.5383	0.0032628	0.00070067
CSIC	X	11321111	Gs2		Gs2-in	intronic	Glutamate-ammonia ligase,gs2,CG1743,GS2,cytoplasmic glutamine synthetase,gs-c,GsII	59	0.35119	9	C	G	C	2.83999e-05	0.409204	143	177.26	181.825	0.0237693	0.00549265	-0.168337	0.00261676	0.00221134	8.83973e-06	0.295571	143	193.548	199.106	0.0225293	0.00488425	-1.5383	0.0032628	0.00070067
CSIC	X	20868361	r-cup	FBgn0031142	-26056	intergenic	CG10998,ryder-cup	15	0.0909091	8	T	C	T	0.000140154	0.565366	143	177.26	180.27	-0.0214839	0.00548736	-0.168337	0.00261676	0.00221134	5.94307e-06	0.28241	143	193.548	199.269	-0.0225971	0.00480073	-1.5383	0.0032628	0.00070067
CSIC	X	20868361	CG11666	FBgn0040648	12085	intergenic		15	0.0909091	8	T	C	T	0.000140154	0.565366	143	177.26	180.27	-0.0214839	0.00548736	-0.168337	0.00261676	0.00221134	5.94307e-06	0.28241	143	193.548	199.269	-0.0225971	0.00480073	-1.5383	0.0032628	0.00070067
CSIC	X	21171393	tRNA:CR32520		-4075	intergenic		16	0.0963855	12	G	C	G	6.81684e-06	0.272661	143	177.26	183.193	-0.0256992	0.00549768	-0.168337	0.00261676	0.00221134	5.95105e-05	0.476101	143	193.548	197.317	-0.0208574	0.00503808	-1.5383	0.0032628	0.00070067
CSIC	X	21171393	mir-1007		3917	intergenic	FBgn0250803,FBgn0262318,CR43025	16	0.0963855	12	G	C	G	6.81684e-06	0.272661	143	177.26	183.193	-0.0256992	0.00549768	-0.168337	0.00261676	0.00221134	5.95105e-05	0.476101	143	193.548	197.317	-0.0208574	0.00503808	-1.5383	0.0032628	0.00070067

## Sheet: IOD
														FEMALES										MALES
Phenotype	Chromosome	Position	Gene Symbol	FlyBase ID	SNP Location	Site Class	Alias	Lines with minor allele	MAF	Mean Coverage	Major Allele	Minor Allele	Reference SNP	Pvalue	Qvalue	N	Null Log Likelihood	Alternative Log Likelihood	SNP Fixed effect	SNP Fixed effect SE	Null Log (σ2E/σ2G)	Null Genetic Variance (σ2G)	Null Residual Variance (σ2E)	Pvalue	Qvalue	N	Null Log Likelihood	Alternative Log Likelihood	SNP Fixed effect	SNP Fixed effect SE	Null Log (σ2E/σ2G)	Null Genetic Variance (σ2G)	Null Residual Variance (σ2E)
IOD	2L	3796517	CG3921		CG3921:3	synonymous		25	0.158228	18	T	C	T	0.000757375	0.830766	143	352.48	352.7	-0.00600511	0.00174409	-0.464606	0.000253127	0.00015906	8.86998e-06	0.709694	143	372.266	376.492	-0.00678862	0.001472	-0.619871	0.000203596	0.000109538
IOD	2L	10318211	CG5381		CG5381-PA	missense		19	0.119497	20	C	T	C	1.88976e-05	0.523815	143	352.48	354.851	0.00729841	0.00164809	-0.464606	0.000253127	0.00015906	7.00801e-06	0.709694	143	372.266	375.342	0.00660141	0.00141419	-0.619871	0.000203596	0.000109538
IOD	2L	10318628	CG5381		CG5381-PA	missense		18	0.111111	23	C	T	C	2.52569e-05	0.525558	143	352.48	355.276	0.00676929	0.00155377	-0.464606	0.000253127	0.00015906	7.7938e-06	0.709694	143	372.266	376.101	0.00617093	0.00132916	-0.619871	0.000203596	0.000109538
IOD	2L	12548349	nub	FBgn0085424	-39522	intergenic	CG15489,FBgn0032438,FBan0015488,FBgn0002970,CG6246,FBan0006246,FBgn0032440,CG15488,FBgn0004393,Pdm,pdm1,CG34395,CG15489,CG15488,CG6246,dOct1,dPOU-19,dPOU19,pdm-1,twn,POU domain protein 1,twain,POU33F1,dPOU-19/pdm-1,Oct-1,pdm,Pdm-1,Pdm1,nb,PDM1,Nubbin,nubbin,Nub,Oct1,Nb	17	0.10303	13	G	A	G	2.10891e-06	0.139181	143	352.48	358.097	0.00765447	0.0015471	-0.464606	0.000253127	0.00015906	0.000394753	0.829504	143	372.266	372.956	0.00507966	0.00139912	-0.619871	0.000203596	0.000109538
IOD	2L	12548349	CR42746	FBgn0261709	4006	intergenic	CG5461,FBgn0010460,FBgn0010670,FBgn0011724,FBgn0014385,FBgn0051857,CG31857,CG42281,short-sighted,CG5461,EP(2)0488,l(2)k02903,l(2)06475,l(2)05479,l(2)02687,shortsighted,shs,1550,l(2)00255,unnamed,TSC-22,short sighted,l(2)rI043,Tsc22,CG31857,Bun,Bunched,bnc,BunA	17	0.10303	13	G	A	G	2.10891e-06	0.139181	143	352.48	358.097	0.00765447	0.0015471	-0.464606	0.000253127	0.00015906	0.000394753	0.829504	143	372.266	372.956	0.00507966	0.00139912	-0.619871	0.000203596	0.000109538
IOD	2L	12800465	kek1		-18465	intergenic	FBgn0005766,FBgn0028957,kek-1,Kekkon,Kekkon-1,kekkon,kekkonI,Dmkek1,Kekon-1,SD01674,kekon,Kek,Kek-1,KEK1,kek,Kek1,CT18186,kekkon1,NB1,unstrung,uns,l(2)01433,GM02380,n(2)k07332,BEST:GM02380,CG12283,Kekkon 1,Kekkon1	9	0.0592105	18	C	T	C	1.9057e-06	0.13239	143	352.48	358.422	0.00796816	0.001603	-0.464606	0.000253127	0.00015906	6.73287e-06	0.709694	143	372.266	376.857	0.0065801	0.00140676	-0.619871	0.000203596	0.000109538
IOD	2L	12800465	CG15483	FBgn0032457	38625	intergenic		9	0.0592105	18	C	T	C	1.9057e-06	0.13239	143	352.48	358.422	0.00796816	0.001603	-0.464606	0.000253127	0.00015906	6.73287e-06	0.709694	143	372.266	376.857	0.0065801	0.00140676	-0.619871	0.000203596	0.000109538
IOD	2L	12805398	kek1		-13532	intergenic	FBgn0005766,FBgn0028957,kek-1,Kekkon,Kekkon-1,kekkon,kekkonI,Dmkek1,Kekon-1,SD01674,kekon,Kek,Kek-1,KEK1,kek,Kek1,CT18186,kekkon1,NB1,unstrung,uns,l(2)01433,GM02380,n(2)k07332,BEST:GM02380,CG12283,Kekkon 1,Kekkon1	7	0.0469799	8	G	C	G	6.89814e-09	0.00190454	143	352.48	363.855	0.00931685	0.00151054	-0.464606	0.000253127	0.00015906	7.70216e-07	0.190617	143	372.266	378.909	0.00701183	0.00135503	-0.619871	0.000203596	0.000109538
IOD	2L	12805398	CG15483	FBgn0032457	43558	intergenic		7	0.0469799	8	G	C	G	6.89814e-09	0.00190454	143	352.48	363.855	0.00931685	0.00151054	-0.464606	0.000253127	0.00015906	7.70216e-07	0.190617	143	372.266	378.909	0.00701183	0.00135503	-0.619871	0.000203596	0.000109538
IOD	2L	12805608	kek1		-13322	intergenic	FBgn0005766,FBgn0028957,kek-1,Kekkon,Kekkon-1,kekkon,kekkonI,Dmkek1,Kekon-1,SD01674,kekon,Kek,Kek-1,KEK1,kek,Kek1,CT18186,kekkon1,NB1,unstrung,uns,l(2)01433,GM02380,n(2)k07332,BEST:GM02380,CG12283,Kekkon 1,Kekkon1	10	0.0617284	11	G	T	G	7.69721e-09	0.00190454	143	352.48	363.743	0.00923646	0.00150287	-0.464606	0.000253127	0.00015906	1.0109e-06	0.190617	143	372.266	378.64	0.00690272	0.00134977	-0.619871	0.000203596	0.000109538
IOD	2L	12805608	CG15483	FBgn0032457	43768	intergenic		10	0.0617284	11	G	T	G	7.69721e-09	0.00190454	143	352.48	363.743	0.00923646	0.00150287	-0.464606	0.000253127	0.00015906	1.0109e-06	0.190617	143	372.266	378.64	0.00690272	0.00134977	-0.619871	0.000203596	0.000109538
IOD	2L	12805618	kek1		-13312	intergenic	FBgn0005766,FBgn0028957,kek-1,Kekkon,Kekkon-1,kekkon,kekkonI,Dmkek1,Kekon-1,SD01674,kekon,Kek,Kek-1,KEK1,kek,Kek1,CT18186,kekkon1,NB1,unstrung,uns,l(2)01433,GM02380,n(2)k07332,BEST:GM02380,CG12283,Kekkon 1,Kekkon1	10	0.0613497	11	C	T	C	7.69721e-09	0.00190454	143	352.48	363.743	0.00923646	0.00150287	-0.464606	0.000253127	0.00015906	1.0109e-06	0.190617	143	372.266	378.64	0.00690272	0.00134977	-0.619871	0.000203596	0.000109538
IOD	2L	12805618	CG15483	FBgn0032457	43778	intergenic		10	0.0613497	11	C	T	C	7.69721e-09	0.00190454	143	352.48	363.743	0.00923646	0.00150287	-0.464606	0.000253127	0.00015906	1.0109e-06	0.190617	143	372.266	378.64	0.00690272	0.00134977	-0.619871	0.000203596	0.000109538
IOD	2L	12805619	kek1		-13311	intergenic	FBgn0005766,FBgn0028957,kek-1,Kekkon,Kekkon-1,kekkon,kekkonI,Dmkek1,Kekon-1,SD01674,kekon,Kek,Kek-1,KEK1,kek,Kek1,CT18186,kekkon1,NB1,unstrung,uns,l(2)01433,GM02380,n(2)k07332,BEST:GM02380,CG12283,Kekkon 1,Kekkon1	8	0.0490798	11	G	A	G	7.69721e-09	0.00190454	143	352.48	363.743	0.00923646	0.00150287	-0.464606	0.000253127	0.00015906	1.0109e-06	0.190617	143	372.266	378.64	0.00690272	0.00134977	-0.619871	0.000203596	0.000109538
IOD	2L	12805619	CG15483	FBgn0032457	43779	intergenic		8	0.0490798	11	G	A	G	7.69721e-09	0.00190454	143	352.48	363.743	0.00923646	0.00150287	-0.464606	0.000253127	0.00015906	1.0109e-06	0.190617	143	372.266	378.64	0.00690272	0.00134977	-0.619871	0.000203596	0.000109538
IOD	2L	12805656	kek1		-13274	intergenic	FBgn0005766,FBgn0028957,kek-1,Kekkon,Kekkon-1,kekkon,kekkonI,Dmkek1,Kekon-1,SD01674,kekon,Kek,Kek-1,KEK1,kek,Kek1,CT18186,kekkon1,NB1,unstrung,uns,l(2)01433,GM02380,n(2)k07332,BEST:GM02380,CG12283,Kekkon 1,Kekkon1	8	0.0490798	10	T	C	T	7.89913e-09	0.00190454	143	352.48	363.719	0.00925113	0.00150654	-0.464606	0.000253127	0.00015906	8.05513e-07	0.190617	143	372.266	378.862	0.00697545	0.00135061	-0.619871	0.000203596	0.000109538
IOD	2L	12805656	CG15483	FBgn0032457	43816	intergenic		8	0.0490798	10	T	C	T	7.89913e-09	0.00190454	143	352.48	363.719	0.00925113	0.00150654	-0.464606	0.000253127	0.00015906	8.05513e-07	0.190617	143	372.266	378.862	0.00697545	0.00135061	-0.619871	0.000203596	0.000109538
IOD	2L	12805776	kek1		-13154	intergenic	FBgn0005766,FBgn0028957,kek-1,Kekkon,Kekkon-1,kekkon,kekkonI,Dmkek1,Kekon-1,SD01674,kekon,Kek,Kek-1,KEK1,kek,Kek1,CT18186,kekkon1,NB1,unstrung,uns,l(2)01433,GM02380,n(2)k07332,BEST:GM02380,CG12283,Kekkon 1,Kekkon1	9	0.0552147	12	T	G	T	2.73506e-07	0.0451263	143	352.48	360.255	0.00832832	0.00154178	-0.464606	0.000253127	0.00015906	3.51614e-05	0.770271	143	372.266	375.234	0.00591921	0.00138496	-0.619871	0.000203596	0.000109538
IOD	2L	12805776	CG15483	FBgn0032457	43936	intergenic		9	0.0552147	12	T	G	T	2.73506e-07	0.0451263	143	352.48	360.255	0.00832832	0.00154178	-0.464606	0.000253127	0.00015906	3.51614e-05	0.770271	143	372.266	375.234	0.00591921	0.00138496	-0.619871	0.000203596	0.000109538
IOD	2L	12806812	kek1		-12118	intergenic	FBgn0005766,FBgn0028957,kek-1,Kekkon,Kekkon-1,kekkon,kekkonI,Dmkek1,Kekon-1,SD01674,kekon,Kek,Kek-1,KEK1,kek,Kek1,CT18186,kekkon1,NB1,unstrung,uns,l(2)01433,GM02380,n(2)k07332,BEST:GM02380,CG12283,Kekkon 1,Kekkon1	8	0.0487805	17	A	G	A	8.65741e-09	0.00190454	143	352.48	363.626	0.00919623	0.00150212	-0.464606	0.000253127	0.00015906	9.57003e-07	0.190617	143	372.266	378.693	0.00690714	0.00134741	-0.619871	0.000203596	0.000109538
IOD	2L	12806812	CG15483	FBgn0032457	44972	intergenic		8	0.0487805	17	A	G	A	8.65741e-09	0.00190454	143	352.48	363.626	0.00919623	0.00150212	-0.464606	0.000253127	0.00015906	9.57003e-07	0.190617	143	372.266	378.693	0.00690714	0.00134741	-0.619871	0.000203596	0.000109538
IOD	2L	12807890	kek1		-11040	intergenic	FBgn0005766,FBgn0028957,kek-1,Kekkon,Kekkon-1,kekkon,kekkonI,Dmkek1,Kekon-1,SD01674,kekon,Kek,Kek-1,KEK1,kek,Kek1,CT18186,kekkon1,NB1,unstrung,uns,l(2)01433,GM02380,n(2)k07332,BEST:GM02380,CG12283,Kekkon 1,Kekkon1	8	0.0493827	10	T	A	T	3.11207e-07	0.0456415	143	352.48	360.131	0.00829073	0.00154282	-0.464606	0.000253127	0.00015906	1.63702e-05	0.770271	143	372.266	375.953	0.00614327	0.0013763	-0.619871	0.000203596	0.000109538
IOD	2L	12807890	CG15483	FBgn0032457	46050	intergenic		8	0.0493827	10	T	A	T	3.11207e-07	0.0456415	143	352.48	360.131	0.00829073	0.00154282	-0.464606	0.000253127	0.00015906	1.63702e-05	0.770271	143	372.266	375.953	0.00614327	0.0013763	-0.619871	0.000203596	0.000109538
IOD	2L	13257856	CG31851		CG31851-PA	synonymous	FBgn0032496,CG16821	48	0.307692	18	G	A	G	4.70454e-06	0.248388	143	352.48	357.364	0.00807763	0.00169628	-0.464606	0.000253127	0.00015906	6.62736e-05	0.829504	143	372.266	374.6	0.00619581	0.0015067	-0.619871	0.000203596	0.000109538
IOD	2L	13901183	Smg5		Smg5:4	synonymous	FBgn0027901,CG8954,SMG5,anon-34Ea,unnamed,BG:DS08220.2,dSMG5	20	0.124224	14	T	A	T	1.65483e-06	0.121348	143	352.48	358.516	0.00813882	0.00162683	-0.464606	0.000253127	0.00015906	0.000175023	0.829504	143	372.266	373.756	0.00562933	0.00146013	-0.619871	0.000203596	0.000109538
IOD	2L	19212243	CG31797		-47284	intergenic	FBgn0032766,FBgn0032767,CT35089,CG15176,CG15175	19	0.115152	17	C	T	C	7.51783e-06	0.354395	143	352.48	357.07	0.00752813	0.0016185	-0.464606	0.000253127	0.00015906	0.000382923	0.829504	143	372.266	373.016	0.00526001	0.00144538	-0.619871	0.000203596	0.000109538
IOD	2L	19212243	drl		3628	intergenic	FBgn0032764,FBgn0032765,derailed,linotte,lionette,lio,DRL,lin,lio/drl,CG17348,CG10758,unnamed,Drl,Derailed	19	0.115152	17	C	T	C	7.51783e-06	0.354395	143	352.48	357.07	0.00752813	0.0016185	-0.464606	0.000253127	0.00015906	0.000382923	0.829504	143	372.266	373.016	0.00526001	0.00144538	-0.619871	0.000203596	0.000109538
IOD	2L	19228357	CG31797		-31170	intergenic	FBgn0032766,FBgn0032767,CT35089,CG15176,CG15175	13	0.0866667	11	G	A	G	6.8784e-08	0.0129701	143	352.48	361.622	0.00893458	0.00156858	-0.464606	0.000253127	0.00015906	3.95174e-05	0.770271	143	372.266	375.166	0.00604997	0.00142539	-0.619871	0.000203596	0.000109538
IOD	2L	19228357	drl		19742	intergenic	FBgn0032764,FBgn0032765,derailed,linotte,lionette,lio,DRL,lin,lio/drl,CG17348,CG10758,unnamed,Drl,Derailed	13	0.0866667	11	G	A	G	6.8784e-08	0.0129701	143	352.48	361.622	0.00893458	0.00156858	-0.464606	0.000253127	0.00015906	3.95174e-05	0.770271	143	372.266	375.166	0.00604997	0.00142539	-0.619871	0.000203596	0.000109538
IOD	2L	19228455	CG31797		-31072	intergenic	FBgn0032766,FBgn0032767,CT35089,CG15176,CG15175	14	0.0909091	16	T	G	T	1.44875e-06	0.119086	143	352.48	358.669	0.00813154	0.00161564	-0.464606	0.000253127	0.00015906	0.000318389	0.829504	143	372.266	373.196	0.00537349	0.00145585	-0.619871	0.000203596	0.000109538
IOD	2L	19228455	drl		19840	intergenic	FBgn0032764,FBgn0032765,derailed,linotte,lionette,lio,DRL,lin,lio/drl,CG17348,CG10758,unnamed,Drl,Derailed	14	0.0909091	16	T	G	T	1.44875e-06	0.119086	143	352.48	358.669	0.00813154	0.00161564	-0.464606	0.000253127	0.00015906	0.000318389	0.829504	143	372.266	373.196	0.00537349	0.00145585	-0.619871	0.000203596	0.000109538
IOD	2L	19228456	CG31797		-31071	intergenic	FBgn0032766,FBgn0032767,CT35089,CG15176,CG15175	14	0.0915033	16	G	C	G	1.44875e-06	0.119086	143	352.48	358.669	0.00813154	0.00161564	-0.464606	0.000253127	0.00015906	0.000318389	0.829504	143	372.266	373.196	0.00537349	0.00145585	-0.619871	0.000203596	0.000109538
IOD	2L	19228456	drl		19841	intergenic	FBgn0032764,FBgn0032765,derailed,linotte,lionette,lio,DRL,lin,lio/drl,CG17348,CG10758,unnamed,Drl,Derailed	14	0.0915033	16	G	C	G	1.44875e-06	0.119086	143	352.48	358.669	0.00813154	0.00161564	-0.464606	0.000253127	0.00015906	0.000318389	0.829504	143	372.266	373.196	0.00537349	0.00145585	-0.619871	0.000203596	0.000109538
IOD	2R	8440789	CG30056	FBgn0050056	-8801	intergenic	FBgn0045109,FBgn0045372,FBgn0045381,NEST:bs33g02,NEST:bs07h07,NEST:bs07b11	19	0.114458	15	G	A	G	0.00074253	0.830766	143	352.48	352.56	0.00547069	0.00158621	-0.464606	0.000253127	0.00015906	1.49077e-06	0.245965	143	372.266	377.981	0.00662834	0.00131867	-0.619871	0.000203596	0.000109538
IOD	2R	8440789	CG33752		6983	intergenic	CT24981,CG8581,Fra,Frazzled,DCC/Frazzled,frazzled,DCC,Netrin-receptor,deleted in colorectal cancer	19	0.114458	15	G	A	G	0.00074253	0.830766	143	352.48	352.56	0.00547069	0.00158621	-0.464606	0.000253127	0.00015906	1.49077e-06	0.245965	143	372.266	377.981	0.00662834	0.00131867	-0.619871	0.000203596	0.000109538
IOD	2R	8440789	fra		fra-in	intronic	CT24981,CG8581,Fra,Frazzled,DCC/Frazzled,frazzled,DCC,Netrin-receptor,deleted in colorectal cancer	19	0.114458	15	G	A	G	0.00074253	0.830766	143	352.48	352.56	0.00547069	0.00158621	-0.464606	0.000253127	0.00015906	1.49077e-06	0.245965	143	372.266	377.981	0.00662834	0.00131867	-0.619871	0.000203596	0.000109538
IOD	2R	9220916	CG17048	FBgn0033828	-20315	intergenic		12	0.0727273	19	T	C	T	6.16939e-07	0.081432	143	352.48	358.821	0.00801056	0.00153347	-0.464606	0.000253127	0.00015906	0.000195452	0.829504	143	372.266	373.4	0.00530096	0.00138572	-0.619871	0.000203596	0.000109538
IOD	2R	9220916	mir-184		3910	intergenic	FBgn0067726,CR33576,FBgn0067725,CR33577,FBgn0262218,CR42925,miR-184,CR33576,dme-mir-184,mir-184,dme-miR-184,CR33577,mir-184*,miR-184S,mir-184S	12	0.0727273	19	T	C	T	6.16939e-07	0.081432	143	352.48	358.821	0.00801056	0.00153347	-0.464606	0.000253127	0.00015906	0.000195452	0.829504	143	372.266	373.4	0.00530096	0.00138572	-0.619871	0.000203596	0.000109538
IOD	2R	14567246	CG15086		CG15086-PF	synonymous		31	0.190184	23	C	G	C	1.26946e-06	0.119086	143	352.48	358.587	0.0080993	0.00159976	-0.464606	0.000253127	0.00015906	4.52175e-05	0.786662	143	372.266	374.851	0.00600631	0.0014266	-0.619871	0.000203596	0.000109538
IOD	2R	17676052	lox2		-1069	intergenic	Dmloxl-2,dmlox-2,CG4402	11	0.0670732	16	A	C	A	1.53375e-06	0.119086	143	352.48	357.951	0.00803898	0.00160136	-0.464606	0.000253127	0.00015906	8.68871e-06	0.709694	143	372.266	376.007	0.0065094	0.00140995	-0.619871	0.000203596	0.000109538
IOD	2R	17676052	CG4021	FBgn0034659	13671	intergenic	cg4021	11	0.0670732	16	A	C	A	1.53375e-06	0.119086	143	352.48	357.951	0.00803898	0.00160136	-0.464606	0.000253127	0.00015906	8.68871e-06	0.709694	143	372.266	376.007	0.0065094	0.00140995	-0.619871	0.000203596	0.000109538
IOD	3L	8915106	Tsp66E		Tsp66E-in	intronic	CG4999,Dm.Tsp66E	14	0.0886076	6	A	G	A	1.0467e-06	0.119086	143	352.48	358.952	0.00825503	0.00161667	-0.464606	0.000253127	0.00015906	9.14044e-06	0.709694	143	372.266	376.545	0.00658603	0.0014303	-0.619871	0.000203596	0.000109538
IOD	3L	8915111	Tsp66E		Tsp66E-in	intronic	CG4999,Dm.Tsp66E	19	0.116564	7	T	A	T	1.17063e-06	0.119086	143	352.48	358.802	0.0082478	0.00162324	-0.464606	0.000253127	0.00015906	1.15827e-05	0.732597	143	372.266	376.27	0.00653446	0.00143688	-0.619871	0.000203596	0.000109538
IOD	3L	8915122	Tsp66E		Tsp66E-in	intronic	CG4999,Dm.Tsp66E	16	0.104575	7	T	A	T	3.43542e-06	0.21593	143	352.48	357.831	0.00795991	0.00164622	-0.464606	0.000253127	0.00015906	2.2824e-05	0.770271	143	372.266	375.689	0.0063683	0.00145334	-0.619871	0.000203596	0.000109538
IOD	3L	8915127	Tsp66E		Tsp66E-in	intronic	CG4999,Dm.Tsp66E	17	0.108974	7	G	A	G	9.91839e-06	0.401629	143	352.48	356.737	0.00758027	0.00165326	-0.464606	0.000253127	0.00015906	0.000502421	0.829504	143	372.266	372.706	0.00526962	0.00147938	-0.619871	0.000203596	0.000109538
IOD	3L	8915134	Tsp66E		Tsp66E-in	intronic	CG4999,Dm.Tsp66E	17	0.111111	7	G	T	G	4.46033e-06	0.245307	143	352.48	357.525	0.00782418	0.00163876	-0.464606	0.000253127	0.00015906	3.70575e-05	0.770271	143	372.266	375.176	0.00617227	0.00144866	-0.619871	0.000203596	0.000109538
IOD	3L	8915136	Tsp66E		Tsp66E-in	intronic	CG4999,Dm.Tsp66E	15	0.0986842	7	T	G	T	4.99159e-06	0.253407	143	352.48	357.446	0.00772624	0.00162724	-0.464606	0.000253127	0.00015906	4.09975e-05	0.770271	143	372.266	375.11	0.00609173	0.00143838	-0.619871	0.000203596	0.000109538
IOD	3L	8915142	Tsp66E		Tsp66E-in	intronic	CG4999,Dm.Tsp66E	16	0.10596	7	A	G	A	3.84403e-06	0.230631	143	352.48	357.717	0.00796035	0.00165525	-0.464606	0.000253127	0.00015906	3.38054e-05	0.770271	143	372.266	375.315	0.00627057	0.00146378	-0.619871	0.000203596	0.000109538
IOD	3L	8915198	Tsp66E		Tsp66E-in	intronic	CG4999,Dm.Tsp66E	16	0.108844	7	T	A	T	9.52468e-06	0.401629	143	352.48	356.86	0.00772565	0.0016814	-0.464606	0.000253127	0.00015906	8.94981e-05	0.829504	143	372.266	374.411	0.00600157	0.00148776	-0.619871	0.000203596	0.000109538
IOD	3L	17114489	Rbp6	FBgn0052169	Rbp6-in	intronic	FBgn0010260,FBgn0052169,FBgn0036699,FBgn0036700,FBgn0036701,FBgn0063045,RRM6,rrm6,BcDNA:RE25373,CG6573,CG14056,CG14055,CG32169	12	0.0727273	11	A	T	A	2.08857e-05	0.525558	143	352.48	355.958	0.00734943	0.0016689	-0.464606	0.000253127	0.00015906	3.16803e-06	0.464622	143	372.266	377.285	0.00694839	0.00143147	-0.619871	0.000203596	0.000109538
IOD	3L	20850935	CG32432		CG32432-in	intronic	FBgn0037032,FBgn0037033,FBgn0037034,CG13257,CG13256,FBgn0037032,CG3116	78	0.493671	14	A	T	T	7.97622e-06	0.363038	143	352.48	357.026	-0.00770105	0.00166071	-0.464606	0.000253127	0.00015906	1.96273e-05	0.770271	143	372.266	375.645	-0.00643914	0.00145712	-0.619871	0.000203596	0.000109538
IOD	3R	3271914	tRNA:V3b:84Db		-5105	intergenic	FBgn0003853,FBgn0011997,FBgn0051512,FBgn0060024,valine tRNA,tRNA[Val][[3b]],Val-3b,AE002699.trna12-ValCAC,tRNA:V3b,tRNA:V:CAC:AE002699-c,CR31512,tRNA:val3b:84Db	34	0.209877	13	G	T	G	7.0554e-06	0.344914	143	352.48	357.01	0.00757682	0.0016237	-0.464606	0.000253127	0.00015906	6.53251e-06	0.709694	143	372.266	376.702	0.00661569	0.00141221	-0.619871	0.000203596	0.000109538
IOD	3R	3271914	CG14598		4200	intergenic		34	0.209877	13	G	T	G	7.0554e-06	0.344914	143	352.48	357.01	0.00757682	0.0016237	-0.464606	0.000253127	0.00015906	6.53251e-06	0.709694	143	372.266	376.702	0.00661569	0.00141221	-0.619871	0.000203596	0.000109538
IOD	3R	15544913	GluClalpha	FBgn0024963	-11768	intergenic	FBgn0063176,CG7535-RA,CG7535-PA,CG7535-RB,CG7535-PB,CG7535-RC,DrosGluCl-alpha1,dGluCl-alpha,CG7535,GluCla,DmGlu,DrosGlu-Cl-alpha,DmGluClalpha,GluCl,glc,DrosGluCl-alpha,indefinite,DrosGluCl,GLUCL,GluClalpha,BcDNA:HL07853,Dm-GluCl	28	0.175	7	G	T	G	4.13153e-06	0.237103	143	352.48	357.642	0.00796138	0.00166127	-0.464606	0.000253127	0.00015906	3.7819e-05	0.770271	143	372.266	375.189	0.00625296	0.00146937	-0.619871	0.000203596	0.000109538
IOD	3R	15544913	CG34286	FBgn0085315	3264	intergenic		28	0.175	7	G	T	G	4.13153e-06	0.237103	143	352.48	357.642	0.00796138	0.00166127	-0.464606	0.000253127	0.00015906	3.7819e-05	0.770271	143	372.266	375.189	0.00625296	0.00146937	-0.619871	0.000203596	0.000109538
IOD	3R	26936150	Prosalpha3T		-11705	intergenic	FBgn0039819,FBgn0041192,CG1736,Prosalpha3T,prosalpha3T,20s proteasome,20S proteasome,Proteasome 20S alpha3t subunit,Pros20S-alpha3t	34	0.209877	17	T	C	T	1.44465e-06	0.119086	143	352.48	358.406	-0.00906878	0.00180163	-0.464606	0.000253127	0.00015906	5.84712e-07	0.190617	143	372.266	378.818	-0.0081816	0.00156266	-0.619871	0.000203596	0.000109538
IOD	3R	26936150	CG11318		1240	intergenic	FBgn0046607,FBgn0046608,anon-WO0170980.122,anon-WO0170980.121	34	0.209877	17	T	C	T	1.44465e-06	0.119086	143	352.48	358.406	-0.00906878	0.00180163	-0.464606	0.000253127	0.00015906	5.84712e-07	0.190617	143	372.266	378.818	-0.0081816	0.00156266	-0.619871	0.000203596	0.000109538
IOD	3R	26963968	Gycbeta100B	FBgn0013973	Gycbeta100B-in	intronic	CG1470,Gycbeta-100B,Dgc beta 1,dgcb1,dgcbeta1,Gycbeta100B,gycbeta100B	27	0.160714	16	A	C	A	1.03455e-05	0.401629	143	352.48	356.441	0.00733167	0.00160258	-0.464606	0.000253127	0.00015906	4.35818e-06	0.575253	143	372.266	376.777	0.00662476	0.00138597	-0.619871	0.000203596	0.000109538

## Sheet: IODIC
														FEMALES										MALES
Phenotype	Chromosome	Position	Gene Symbol	FlyBase ID	SNP Location	Site Class	Alias	Lines with minor allele	MAF	Mean Coverage	Major Allele	Minor Allele	Reference SNP	Pvalue	Qvalue	N	Null Log Likelihood	Alternative Log Likelihood	SNP Fixed effect	SNP Fixed effect SE	Null Log (σ2E/σ2G)	Null Genetic Variance (σ2G)	Null Residual Variance (σ2E)	Pvalue	Qvalue	N	Null Log Likelihood	Alternative Log Likelihood	SNP Fixed effect	SNP Fixed effect SE	Null Log (σ2E/σ2G)	Null Genetic Variance (σ2G)	Null Residual Variance (σ2E)
IODIC	2L	6380554	CG42368	FBgn0259714	CG42368-in	intronic	CG9508,FBgn0031810,FBgn0031809,CG9511,FBan0009511,FBgn0031807,FBgn0053295,CG9511,CG9508,CG33295,CG13981	14	0.0843373	13	G	A	G	7.33765e-05	0.463983	143	358.926	361.284	0.00642568	0.00157269	0.379912	0.000150005	0.00021933	4.56784e-06	0.301463	143	377.045	381.972	0.00646626	0.00135593	0.309517	0.000121273	0.000165267
IODIC	2L	8006802	Spn28D	FBgn0031973	Spn28D-cds	missense	Dm-Spn28D,Dm-serpin-28D,CG7219,spn28D,Serpin-28D,Spn28Dc	58	0.369427	15	T	C	T	2.76477e-06	0.173856	143	358.926	364.41	-0.00757283	0.00155007	0.379912	0.000150005	0.00021933	5.51895e-05	0.591709	143	377.045	379.585	-0.00579471	0.00139319	0.309517	0.000121273	0.000165267
IODIC	2L	8436244	D12		D12-in	intronic	CG13400	18	0.111111	24	G	T	G	9.99402e-06	0.25609	143	358.926	362.503	0.00705485	0.00153928	0.379912	0.000150005	0.00021933	0.00063945	0.71661	143	377.045	377.051	0.00488909	0.00139988	0.309517	0.000121273	0.000165267
IODIC	2L	10318211	CG5381		CG5381-PA	missense		19	0.119497	20	C	T	C	6.50861e-06	0.212644	143	358.926	362.673	0.00735968	0.00157073	0.379912	0.000150005	0.00021933	2.66485e-06	0.270572	143	377.045	381.663	0.00670833	0.00137074	0.309517	0.000121273	0.000165267
IODIC	2L	10318628	CG5381		CG5381-PA	missense		18	0.111111	23	C	T	C	1.52538e-05	0.324742	143	358.926	362.321	0.00673321	0.00150266	0.379912	0.000150005	0.00021933	4.54623e-06	0.301463	143	377.045	381.564	0.0062375	0.00130766	0.309517	0.000121273	0.000165267
IODIC	2L	12548349	nub	FBgn0085424	-39522	intergenic	CG15489,FBgn0032438,FBan0015488,FBgn0002970,CG6246,FBan0006246,FBgn0032440,CG15488,FBgn0004393,Pdm,pdm1,CG34395,CG15489,CG15488,CG6246,dOct1,dPOU-19,dPOU19,pdm-1,twn,POU domain protein 1,twain,POU33F1,dPOU-19/pdm-1,Oct-1,pdm,Pdm-1,Pdm1,nb,PDM1,Nubbin,nubbin,Nub,Oct1,Nb	17	0.10303	13	G	A	G	6.00798e-06	0.212644	143	358.926	363.53	0.00706679	0.00150215	0.379912	0.000150005	0.00021933	0.00102206	0.720241	143	377.045	376.817	0.00459912	0.00137109	0.309517	0.000121273	0.000165267
IODIC	2L	12548349	CR42746	FBgn0261709	4006	intergenic	CG5461,FBgn0010460,FBgn0010670,FBgn0011724,FBgn0014385,FBgn0051857,CG31857,CG42281,short-sighted,CG5461,EP(2)0488,l(2)k02903,l(2)06475,l(2)05479,l(2)02687,shortsighted,shs,1550,l(2)00255,unnamed,TSC-22,short sighted,l(2)rI043,Tsc22,CG31857,Bun,Bunched,bnc,BunA	17	0.10303	13	G	A	G	6.00798e-06	0.212644	143	358.926	363.53	0.00706679	0.00150215	0.379912	0.000150005	0.00021933	0.00102206	0.720241	143	377.045	376.817	0.00459912	0.00137109	0.309517	0.000121273	0.000165267
IODIC	2L	12800465	kek1		-18465	intergenic	FBgn0005766,FBgn0028957,kek-1,Kekkon,Kekkon-1,kekkon,kekkonI,Dmkek1,Kekon-1,SD01674,kekon,Kek,Kek-1,KEK1,kek,Kek1,CT18186,kekkon1,NB1,unstrung,uns,l(2)01433,GM02380,n(2)k07332,BEST:GM02380,CG12283,Kekkon 1,Kekkon1	9	0.0592105	18	C	T	C	2.78035e-06	0.173856	143	358.926	364.457	0.00746668	0.00152874	0.379912	0.000150005	0.00021933	1.56816e-05	0.517469	143	377.045	380.786	0.00610159	0.00136376	0.309517	0.000121273	0.000165267
IODIC	2L	12800465	CG15483	FBgn0032457	38625	intergenic		9	0.0592105	18	C	T	C	2.78035e-06	0.173856	143	358.926	364.457	0.00746668	0.00152874	0.379912	0.000150005	0.00021933	1.56816e-05	0.517469	143	377.045	380.786	0.00610159	0.00136376	0.309517	0.000121273	0.000165267
IODIC	2L	12805398	kek1		-13532	intergenic	FBgn0005766,FBgn0028957,kek-1,Kekkon,Kekkon-1,kekkon,kekkonI,Dmkek1,Kekon-1,SD01674,kekon,Kek,Kek-1,KEK1,kek,Kek1,CT18186,kekkon1,NB1,unstrung,uns,l(2)01433,GM02380,n(2)k07332,BEST:GM02380,CG12283,Kekkon 1,Kekkon1	7	0.0469799	8	G	C	G	5.99448e-09	0.0015854	143	358.926	370.402	0.00897263	0.00144811	0.379912	0.000150005	0.00021933	1.43742e-06	0.260314	143	377.045	383.048	0.00665879	0.00132256	0.309517	0.000121273	0.000165267
IODIC	2L	12805398	CG15483	FBgn0032457	43558	intergenic		7	0.0469799	8	G	C	G	5.99448e-09	0.0015854	143	358.926	370.402	0.00897263	0.00144811	0.379912	0.000150005	0.00021933	1.43742e-06	0.260314	143	377.045	383.048	0.00665879	0.00132256	0.309517	0.000121273	0.000165267
IODIC	2L	12805608	kek1		-13322	intergenic	FBgn0005766,FBgn0028957,kek-1,Kekkon,Kekkon-1,kekkon,kekkonI,Dmkek1,Kekon-1,SD01674,kekon,Kek,Kek-1,KEK1,kek,Kek1,CT18186,kekkon1,NB1,unstrung,uns,l(2)01433,GM02380,n(2)k07332,BEST:GM02380,CG12283,Kekkon 1,Kekkon1	10	0.0617284	11	G	T	G	6.50196e-09	0.0015854	143	358.926	370.316	0.00889535	0.00143943	0.379912	0.000150005	0.00021933	1.77495e-06	0.260314	143	377.045	382.817	0.00656274	0.00131598	0.309517	0.000121273	0.000165267
IODIC	2L	12805608	CG15483	FBgn0032457	43768	intergenic		10	0.0617284	11	G	T	G	6.50196e-09	0.0015854	143	358.926	370.316	0.00889535	0.00143943	0.379912	0.000150005	0.00021933	1.77495e-06	0.260314	143	377.045	382.817	0.00656274	0.00131598	0.309517	0.000121273	0.000165267
IODIC	2L	12805618	kek1		-13312	intergenic	FBgn0005766,FBgn0028957,kek-1,Kekkon,Kekkon-1,kekkon,kekkonI,Dmkek1,Kekon-1,SD01674,kekon,Kek,Kek-1,KEK1,kek,Kek1,CT18186,kekkon1,NB1,unstrung,uns,l(2)01433,GM02380,n(2)k07332,BEST:GM02380,CG12283,Kekkon 1,Kekkon1	10	0.0613497	11	C	T	C	6.50196e-09	0.0015854	143	358.926	370.316	0.00889535	0.00143943	0.379912	0.000150005	0.00021933	1.77495e-06	0.260314	143	377.045	382.817	0.00656274	0.00131598	0.309517	0.000121273	0.000165267
IODIC	2L	12805618	CG15483	FBgn0032457	43778	intergenic		10	0.0613497	11	C	T	C	6.50196e-09	0.0015854	143	358.926	370.316	0.00889535	0.00143943	0.379912	0.000150005	0.00021933	1.77495e-06	0.260314	143	377.045	382.817	0.00656274	0.00131598	0.309517	0.000121273	0.000165267
IODIC	2L	12805619	kek1		-13311	intergenic	FBgn0005766,FBgn0028957,kek-1,Kekkon,Kekkon-1,kekkon,kekkonI,Dmkek1,Kekon-1,SD01674,kekon,Kek,Kek-1,KEK1,kek,Kek1,CT18186,kekkon1,NB1,unstrung,uns,l(2)01433,GM02380,n(2)k07332,BEST:GM02380,CG12283,Kekkon 1,Kekkon1	8	0.0490798	11	G	A	G	6.50196e-09	0.0015854	143	358.926	370.316	0.00889535	0.00143943	0.379912	0.000150005	0.00021933	1.77495e-06	0.260314	143	377.045	382.817	0.00656274	0.00131598	0.309517	0.000121273	0.000165267
IODIC	2L	12805619	CG15483	FBgn0032457	43779	intergenic		8	0.0490798	11	G	A	G	6.50196e-09	0.0015854	143	358.926	370.316	0.00889535	0.00143943	0.379912	0.000150005	0.00021933	1.77495e-06	0.260314	143	377.045	382.817	0.00656274	0.00131598	0.309517	0.000121273	0.000165267
IODIC	2L	12805656	kek1		-13274	intergenic	FBgn0005766,FBgn0028957,kek-1,Kekkon,Kekkon-1,kekkon,kekkonI,Dmkek1,Kekon-1,SD01674,kekon,Kek,Kek-1,KEK1,kek,Kek1,CT18186,kekkon1,NB1,unstrung,uns,l(2)01433,GM02380,n(2)k07332,BEST:GM02380,CG12283,Kekkon 1,Kekkon1	8	0.0490798	10	T	C	T	6.6667e-09	0.0015854	143	358.926	370.294	0.00891612	0.00144396	0.379912	0.000150005	0.00021933	1.44989e-06	0.260314	143	377.045	383.035	0.00663265	0.00131788	0.309517	0.000121273	0.000165267
IODIC	2L	12805656	CG15483	FBgn0032457	43816	intergenic		8	0.0490798	10	T	C	T	6.6667e-09	0.0015854	143	358.926	370.294	0.00891612	0.00144396	0.379912	0.000150005	0.00021933	1.44989e-06	0.260314	143	377.045	383.035	0.00663265	0.00131788	0.309517	0.000121273	0.000165267
IODIC	2L	12805776	kek1		-13154	intergenic	FBgn0005766,FBgn0028957,kek-1,Kekkon,Kekkon-1,kekkon,kekkonI,Dmkek1,Kekon-1,SD01674,kekon,Kek,Kek-1,KEK1,kek,Kek1,CT18186,kekkon1,NB1,unstrung,uns,l(2)01433,GM02380,n(2)k07332,BEST:GM02380,CG12283,Kekkon 1,Kekkon1	9	0.0552147	12	T	G	T	1.92064e-07	0.0281681	143	358.926	366.894	0.00809099	0.001477	0.379912	0.000150005	0.00021933	5.38892e-05	0.591709	143	377.045	379.564	0.00562168	0.0013496	0.309517	0.000121273	0.000165267
IODIC	2L	12805776	CG15483	FBgn0032457	43936	intergenic		9	0.0552147	12	T	G	T	1.92064e-07	0.0281681	143	358.926	366.894	0.00809099	0.001477	0.379912	0.000150005	0.00021933	5.38892e-05	0.591709	143	377.045	379.564	0.00562168	0.0013496	0.309517	0.000121273	0.000165267
IODIC	2L	12806812	kek1		-12118	intergenic	FBgn0005766,FBgn0028957,kek-1,Kekkon,Kekkon-1,kekkon,kekkonI,Dmkek1,Kekon-1,SD01674,kekon,Kek,Kek-1,KEK1,kek,Kek1,CT18186,kekkon1,NB1,unstrung,uns,l(2)01433,GM02380,n(2)k07332,BEST:GM02380,CG12283,Kekkon 1,Kekkon1	8	0.0487805	17	A	G	A	7.20671e-09	0.0015854	143	358.926	370.215	0.00886653	0.00143958	0.379912	0.000150005	0.00021933	1.69491e-06	0.260314	143	377.045	382.882	0.0065696	0.00131459	0.309517	0.000121273	0.000165267
IODIC	2L	12806812	CG15483	FBgn0032457	44972	intergenic		8	0.0487805	17	A	G	A	7.20671e-09	0.0015854	143	358.926	370.215	0.00886653	0.00143958	0.379912	0.000150005	0.00021933	1.69491e-06	0.260314	143	377.045	382.882	0.0065696	0.00131459	0.309517	0.000121273	0.000165267
IODIC	2L	12807890	kek1		-11040	intergenic	FBgn0005766,FBgn0028957,kek-1,Kekkon,Kekkon-1,kekkon,kekkonI,Dmkek1,Kekon-1,SD01674,kekon,Kek,Kek-1,KEK1,kek,Kek1,CT18186,kekkon1,NB1,unstrung,uns,l(2)01433,GM02380,n(2)k07332,BEST:GM02380,CG12283,Kekkon 1,Kekkon1	8	0.0493827	10	T	A	T	3.17991e-07	0.0419728	143	358.926	366.533	0.0079572	0.00148205	0.379912	0.000150005	0.00021933	2.881e-05	0.591709	143	377.045	380.157	0.00581147	0.00134404	0.309517	0.000121273	0.000165267
IODIC	2L	12807890	CG15483	FBgn0032457	46050	intergenic		8	0.0493827	10	T	A	T	3.17991e-07	0.0419728	143	358.926	366.533	0.0079572	0.00148205	0.379912	0.000150005	0.00021933	2.881e-05	0.591709	143	377.045	380.157	0.00581147	0.00134404	0.309517	0.000121273	0.000165267
IODIC	2L	13901183	Smg5		Smg5:4	synonymous	FBgn0027901,CG8954,SMG5,anon-34Ea,unnamed,BG:DS08220.2,dSMG5	20	0.124224	14	T	A	T	3.18595e-06	0.175219	143	358.926	364.32	0.00754595	0.00155499	0.379912	0.000150005	0.00021933	0.000421815	0.713356	143	377.045	377.657	0.00510944	0.00141463	0.309517	0.000121273	0.000165267
IODIC	2L	14795303	CG18420		-65	intergenic	FBgn0032552,SPH111,DS06874.6,BG:DS06874.6	36	0.220859	14	T	A	T	0.0012493	0.731887	143	358.926	358.627	0.00530813	0.00161149	0.379912	0.000150005	0.00021933	3.7889e-06	0.294183	143	377.045	382.09	0.00656668	0.0013645	0.309517	0.000121273	0.000165267
IODIC	2L	14795303	CG18636		10717	intergenic	CG18636-RA,CG18636-PA,FBtr0080688,FBpp0080250,unnamed,SPH130	36	0.220859	14	T	A	T	0.0012493	0.731887	143	358.926	358.627	0.00530813	0.00161149	0.379912	0.000150005	0.00021933	3.7889e-06	0.294183	143	377.045	382.09	0.00656668	0.0013645	0.309517	0.000121273	0.000165267
IODIC	2L	14795346	CG18420		-22	intergenic	FBgn0032552,SPH111,DS06874.6,BG:DS06874.6	35	0.217391	13	G	A	G	0.00149248	0.74409	143	358.926	358.449	0.00525403	0.00162175	0.379912	0.000150005	0.00021933	5.83491e-06	0.310792	143	377.045	381.631	0.00648119	0.00137566	0.309517	0.000121273	0.000165267
IODIC	2L	14795346	CG18636		10760	intergenic	CG18636-RA,CG18636-PA,FBtr0080688,FBpp0080250,unnamed,SPH130	35	0.217391	13	G	A	G	0.00149248	0.74409	143	358.926	358.449	0.00525403	0.00162175	0.379912	0.000150005	0.00021933	5.83491e-06	0.310792	143	377.045	381.631	0.00648119	0.00137566	0.309517	0.000121273	0.000165267
IODIC	2L	19228357	CG31797		-31170	intergenic	FBgn0032766,FBgn0032767,CT35089,CG15176,CG15175	13	0.0866667	11	G	A	G	1.05419e-07	0.0173933	143	358.926	367.625	0.00843632	0.0015049	0.379912	0.000150005	0.00021933	8.1457e-05	0.649375	143	377.045	379.186	0.00562327	0.00138553	0.309517	0.000121273	0.000165267
IODIC	2L	19228357	drl		19742	intergenic	FBgn0032764,FBgn0032765,derailed,linotte,lionette,lio,DRL,lin,lio/drl,CG17348,CG10758,unnamed,Drl,Derailed	13	0.0866667	11	G	A	G	1.05419e-07	0.0173933	143	358.926	367.625	0.00843632	0.0015049	0.379912	0.000150005	0.00021933	8.1457e-05	0.649375	143	377.045	379.186	0.00562327	0.00138553	0.309517	0.000121273	0.000165267
IODIC	2L	19228455	CG31797		-31072	intergenic	FBgn0032766,FBgn0032767,CT35089,CG15176,CG15175	14	0.0909091	16	T	G	T	2.14106e-06	0.14874	143	358.926	364.702	0.00758669	0.00153447	0.379912	0.000150005	0.00021933	0.000570142	0.713356	143	377.045	377.386	0.00493286	0.00139911	0.309517	0.000121273	0.000165267
IODIC	2L	19228455	drl		19840	intergenic	FBgn0032764,FBgn0032765,derailed,linotte,lionette,lio,DRL,lin,lio/drl,CG17348,CG10758,unnamed,Drl,Derailed	14	0.0909091	16	T	G	T	2.14106e-06	0.14874	143	358.926	364.702	0.00758669	0.00153447	0.379912	0.000150005	0.00021933	0.000570142	0.713356	143	377.045	377.386	0.00493286	0.00139911	0.309517	0.000121273	0.000165267
IODIC	2L	19228456	CG31797		-31071	intergenic	FBgn0032766,FBgn0032767,CT35089,CG15176,CG15175	14	0.0915033	16	G	C	G	2.14106e-06	0.14874	143	358.926	364.702	0.00758669	0.00153447	0.379912	0.000150005	0.00021933	0.000570142	0.713356	143	377.045	377.386	0.00493286	0.00139911	0.309517	0.000121273	0.000165267
IODIC	2L	19228456	drl		19841	intergenic	FBgn0032764,FBgn0032765,derailed,linotte,lionette,lio,DRL,lin,lio/drl,CG17348,CG10758,unnamed,Drl,Derailed	14	0.0915033	16	G	C	G	2.14106e-06	0.14874	143	358.926	364.702	0.00758669	0.00153447	0.379912	0.000150005	0.00021933	0.000570142	0.713356	143	377.045	377.386	0.00493286	0.00139911	0.309517	0.000121273	0.000165267
IODIC	2R	8440789	CG30056	FBgn0050056	-8801	intergenic	FBgn0045109,FBgn0045372,FBgn0045381,NEST:bs33g02,NEST:bs07h07,NEST:bs07b11	19	0.114458	15	G	A	G	0.000937046	0.696812	143	358.926	358.806	0.00516379	0.00152764	0.379912	0.000150005	0.00021933	2.07227e-06	0.262645	143	377.045	382.543	0.00637864	0.00128819	0.309517	0.000121273	0.000165267
IODIC	2R	8440789	CG33752		6983	intergenic	CT24981,CG8581,Fra,Frazzled,DCC/Frazzled,frazzled,DCC,Netrin-receptor,deleted in colorectal cancer	19	0.114458	15	G	A	G	0.000937046	0.696812	143	358.926	358.806	0.00516379	0.00152764	0.379912	0.000150005	0.00021933	2.07227e-06	0.262645	143	377.045	382.543	0.00637864	0.00128819	0.309517	0.000121273	0.000165267
IODIC	2R	8440789	fra		fra-in	intronic	CT24981,CG8581,Fra,Frazzled,DCC/Frazzled,frazzled,DCC,Netrin-receptor,deleted in colorectal cancer	19	0.114458	15	G	A	G	0.000937046	0.696812	143	358.926	358.806	0.00516379	0.00152764	0.379912	0.000150005	0.00021933	2.07227e-06	0.262645	143	377.045	382.543	0.00637864	0.00128819	0.309517	0.000121273	0.000165267
IODIC	2R	9220916	CG17048	FBgn0033828	-20315	intergenic		12	0.0727273	19	T	C	T	4.11018e-06	0.199374	143	358.926	363.614	0.00718155	0.00149817	0.379912	0.000150005	0.00021933	0.00105029	0.720241	143	377.045	376.657	0.00457977	0.00136865	0.309517	0.000121273	0.000165267
IODIC	2R	9220916	mir-184		3910	intergenic	FBgn0067726,CR33576,FBgn0067725,CR33577,FBgn0262218,CR42925,miR-184,CR33576,dme-mir-184,mir-184,dme-miR-184,CR33577,mir-184*,miR-184S,mir-184S	12	0.0727273	19	T	C	T	4.11018e-06	0.199374	143	358.926	363.614	0.00718155	0.00149817	0.379912	0.000150005	0.00021933	0.00105029	0.720241	143	377.045	376.657	0.00457977	0.00136865	0.309517	0.000121273	0.000165267
IODIC	2R	13846590	dpr13	FBgn0034286	-16032	intergenic	CG14493-RA,CG12557-RA,CG12557-PA,CG14493-PA,CG14493,CG12557,FBgn0034287,FBgn0053996,FBtr0086815,FBpp0085994,FBtr0086816,FBpp0085995,CG33996,CG12557,Dpr-13,CT34204,CG14493	12	0.0718563	11	T	C	T	9.75234e-06	0.25609	143	358.926	362.994	0.00698803	0.00152274	0.379912	0.000150005	0.00021933	0.000224329	0.692586	143	377.045	378.109	0.00519414	0.00137128	0.309517	0.000121273	0.000165267
IODIC	2R	13846590	PpY-55A		2515	intergenic	FBgn0005781,FBgn0034285,DmPpY-55A,protein phosphatase from PCR fragment D19,PPY 55A,CG10930,PPY,D19,protein phosphatase-Y,Protein phosphatase D19,PpD19	12	0.0718563	11	T	C	T	9.75234e-06	0.25609	143	358.926	362.994	0.00698803	0.00152274	0.379912	0.000150005	0.00021933	0.000224329	0.692586	143	377.045	378.109	0.00519414	0.00137128	0.309517	0.000121273	0.000165267
IODIC	2R	14567246	CG15086		CG15086-PF	synonymous		31	0.190184	23	C	G	C	6.21057e-07	0.0745233	143	358.926	365.541	0.00786732	0.00150647	0.379912	0.000150005	0.00021933	5.76586e-05	0.591709	143	377.045	379.422	0.00568424	0.00137033	0.309517	0.000121273	0.000165267
IODIC	2R	14695123	CG15096		-718	intergenic	CT42567	13	0.0807453	17	G	A	G	4.61075e-06	0.205367	143	358.926	362.953	0.00733979	0.00153981	0.379912	0.000150005	0.00021933	0.000138505	0.651409	143	377.045	378.04	0.00544547	0.00138974	0.309517	0.000121273	0.000165267
IODIC	2R	14695123	l(2)08717		3891	intergenic	FBgn0034393,CG15095,8717,lethal (2) 08717,lethal(2)08717	13	0.0807453	17	G	A	G	4.61075e-06	0.205367	143	358.926	362.953	0.00733979	0.00153981	0.379912	0.000150005	0.00021933	0.000138505	0.651409	143	377.045	378.04	0.00544547	0.00138974	0.309517	0.000121273	0.000165267
IODIC	2R	15208003	Rgk1	FBgn0034434	Rgk1-in	intronic	CT27512,CG9811	24	0.152866	7	G	A	G	3.01857e-06	0.173856	143	358.926	363.557	0.00739217	0.00151939	0.379912	0.000150005	0.00021933	1.19264e-05	0.501887	143	377.045	380.529	0.00613094	0.00135024	0.309517	0.000121273	0.000165267
IODIC	2R	17021003	Magi		Magi-in	intronic	FBgn0034591,FBgn0050388,ima,Ima,D-MAGI,CG4117,CG15656,CG30388	18	0.111111	18	C	T	C	7.44754e-06	0.213702	143	358.926	362.709	0.00721412	0.00155025	0.379912	0.000150005	0.00021933	0.000536676	0.713356	143	377.045	377.208	0.00502815	0.00141913	0.309517	0.000121273	0.000165267
IODIC	2R	17496873	CG15673	FBgn0034639	CG15673-in	intronic		27	0.166667	16	T	C	T	3.81365e-06	0.199374	143	358.926	363.493	0.00738312	0.00153464	0.379912	0.000150005	0.00021933	1.26398e-05	0.501887	143	377.045	380.652	0.00617354	0.00136385	0.309517	0.000121273	0.000165267
IODIC	2R	17497333	CG15673	FBgn0034639	CG15673:2	missense		10	0.0609756	15	C	T	C	6.92738e-06	0.212644	143	358.926	362.536	0.00703056	0.00150524	0.379912	0.000150005	0.00021933	4.74967e-05	0.591709	143	377.045	378.895	0.00562642	0.00134035	0.309517	0.000121273	0.000165267
IODIC	2R	17676052	lox2		-1069	intergenic	Dmloxl-2,dmlox-2,CG4402	11	0.0670732	16	A	C	A	7.78091e-08	0.0146719	143	358.926	366.871	0.0082459	0.00145429	0.379912	0.000150005	0.00021933	1.45584e-06	0.260314	143	377.045	382.233	0.00656249	0.00130418	0.309517	0.000121273	0.000165267
IODIC	2R	17676052	CG4021	FBgn0034659	13671	intergenic	cg4021	11	0.0670732	16	A	C	A	7.78091e-08	0.0146719	143	358.926	366.871	0.0082459	0.00145429	0.379912	0.000150005	0.00021933	1.45584e-06	0.260314	143	377.045	382.233	0.00656249	0.00130418	0.309517	0.000121273	0.000165267
IODIC	2R	18493463	RpS16		-163	intergenic	CG4046,bs32d05.y1,S16,M(2)58F	38	0.228916	11	T	C	C	0.00054224	0.641328	143	358.926	359.406	0.00562355	0.0015885	0.379912	0.000150005	0.00021933	3.76484e-06	0.294183	143	377.045	382.097	0.00650875	0.00135205	0.309517	0.000121273	0.000165267
IODIC	2R	18493463	CG4294	FBgn0034742	323	intergenic	FBgn0034742	38	0.228916	11	T	C	C	0.00054224	0.641328	143	358.926	359.406	0.00562355	0.0015885	0.379912	0.000150005	0.00021933	3.76484e-06	0.294183	143	377.045	382.097	0.00650875	0.00135205	0.309517	0.000121273	0.000165267
IODIC	2R	19087664	CG3162		-9984	intergenic	cg3162	40	0.254777	12	T	A	T	2.27166e-05	0.361258	143	358.926	362.214	0.00691378	0.00157741	0.379912	0.000150005	0.00021933	2.3878e-06	0.262645	143	377.045	382.212	0.00671285	0.00136462	0.309517	0.000121273	0.000165267
IODIC	2R	19087664	CG13539	FBgn0034833	14853	intergenic	FBgn0034831,FBgn0034830,CG30188,FBgn0034832,FBgn0050188,CG13548,CG13548,CT32921,CT32922,CG13547,CG13546,CG30188	40	0.254777	12	T	A	T	2.27166e-05	0.361258	143	358.926	362.214	0.00691378	0.00157741	0.379912	0.000150005	0.00021933	2.3878e-06	0.262645	143	377.045	382.212	0.00671285	0.00136462	0.309517	0.000121273	0.000165267
IODIC	2R	19087664	CG34371	FBgn0085400	CG34371-in	intronic	FBgn0034831,FBgn0034830,CG30188,FBgn0034832,FBgn0050188,CG13548,CG13548,CT32921,CT32922,CG13547,CG13546,CG30188	40	0.254777	12	T	A	T	2.27166e-05	0.361258	143	358.926	362.214	0.00691378	0.00157741	0.379912	0.000150005	0.00021933	2.3878e-06	0.262645	143	377.045	382.212	0.00671285	0.00136462	0.309517	0.000121273	0.000165267
IODIC	3L	4812885	Dhc64C	FBgn0010349	Dhc64C-in	intronic	FBgn0010349,FBgn0001059,FBgn0003565,Dhc,dynein heavy chain,dynein,Cytoplasmic dynein,cytoplasmic dynein,cytoplasmic dynenin,cytoplasmic dynein heavy chain,dhc,dhc64C,Dhc64,DHC,Dhc64c,cDhc,DHC64C,CG7507,Laborc,CD,cDhc64C,Cdhc,Fs(3)Lab,HMW MAP,Lab,Fs(3)Laborc,Female sterile(3)Laborc,Cytoplasmic dynein heavy chain,l(3)64Ca,Fs(3)Sz18,Dynein heavy chain,dynein heavy chain 64C,cytoplasmic Dynein heavy …	22	0.13253	22	G	A	A	2.08574e-06	0.14874	143	358.926	364.258	0.00741195	0.00149731	0.379912	0.000150005	0.00021933	0.000467264	0.713356	143	377.045	377.432	0.00491681	0.00137235	0.309517	0.000121273	0.000165267
IODIC	3L	8857647	Mcm7		-27063	intergenic	FBgn0025980,MCM7,mcm7,CG4978,DmMCM7,PCR1,clone 1.66,Minichromosome maintenance-PCR1,anon-EST:Liang-1.66,Mcp-PCR1,McM7,DmeMCM7	27	0.162651	16	G	A	A	9.35169e-06	0.251911	143	358.926	363.277	-0.00698336	0.0015184	0.379912	0.000150005	0.00021933	5.83835e-05	0.592789	143	377.045	379.519	-0.00560922	0.00135329	0.309517	0.000121273	0.000165267
IODIC	3L	8857647	CG32026		25704	intergenic	FBgn0044671,FBgn0047312,BcDNA:GH12815,anon-WO0140519.202	27	0.162651	16	G	A	A	9.35169e-06	0.251911	143	358.926	363.277	-0.00698336	0.0015184	0.379912	0.000150005	0.00021933	5.83835e-05	0.592789	143	377.045	379.519	-0.00560922	0.00135329	0.309517	0.000121273	0.000165267
IODIC	3L	8857647	dally		dally-in	intronic	FBgn0010889,FBgn0014962,CG4974,CT15952,gem,Dally,clone 1.63,genitalia missing,l(3)06464,anon-EST:Liang-1.63,Division abnormally delayed,dally	27	0.162651	16	G	A	A	9.35169e-06	0.251911	143	358.926	363.277	-0.00698336	0.0015184	0.379912	0.000150005	0.00021933	5.83835e-05	0.592789	143	377.045	379.519	-0.00560922	0.00135329	0.309517	0.000121273	0.000165267
IODIC	3L	8915106	Tsp66E		Tsp66E-in	intronic	CG4999,Dm.Tsp66E	14	0.0886076	6	A	G	A	1.14998e-06	0.116762	143	358.926	365.212	0.00775071	0.00152421	0.379912	0.000150005	0.00021933	1.79623e-05	0.542466	143	377.045	380.575	0.00607156	0.0013672	0.309517	0.000121273	0.000165267
IODIC	3L	8915111	Tsp66E		Tsp66E-in	intronic	CG4999,Dm.Tsp66E	19	0.116564	7	T	A	T	9.01266e-07	0.0991345	143	358.926	365.364	0.00782592	0.00152266	0.379912	0.000150005	0.00021933	1.69118e-05	0.53149	143	377.045	380.583	0.00609557	0.00136806	0.309517	0.000121273	0.000165267
IODIC	3L	8915122	Tsp66E		Tsp66E-in	intronic	CG4999,Dm.Tsp66E	16	0.104575	7	T	A	T	6.47213e-06	0.212644	143	358.926	363.538	0.00730795	0.00155925	0.379912	0.000150005	0.00021933	7.20221e-05	0.635154	143	377.045	379.228	0.00570411	0.00139444	0.309517	0.000121273	0.000165267
IODIC	3L	8915134	Tsp66E		Tsp66E-in	intronic	CG4999,Dm.Tsp66E	17	0.111111	7	G	T	G	6.21568e-06	0.212644	143	358.926	363.467	0.00726636	0.00154722	0.379912	0.000150005	0.00021933	9.40892e-05	0.651409	143	377.045	378.925	0.00557956	0.00138766	0.309517	0.000121273	0.000165267
IODIC	3L	8915136	Tsp66E		Tsp66E-in	intronic	CG4999,Dm.Tsp66E	15	0.0986842	7	T	G	T	9.21794e-06	0.251911	143	358.926	363.165	0.00710083	0.00154278	0.379912	0.000150005	0.00021933	0.00012756	0.651409	143	377.045	378.671	0.00544641	0.00138223	0.309517	0.000121273	0.000165267
IODIC	3L	8915142	Tsp66E		Tsp66E-in	intronic	CG4999,Dm.Tsp66E	16	0.10596	7	A	G	A	6.66052e-06	0.212644	143	358.926	363.477	0.0073396	0.00156828	0.379912	0.000150005	0.00021933	9.86159e-05	0.651409	143	377.045	378.905	0.00563279	0.00140522	0.309517	0.000121273	0.000165267
IODIC	3L	10734158	CG12523		-60134	intergenic	FBgn0062974,BcDNA:RE74758	13	0.0778443	13	T	C	T	6.67709e-06	0.212644	143	358.926	363.576	0.00697026	0.00148955	0.379912	0.000150005	0.00021933	4.68187e-05	0.591709	143	377.045	379.712	0.00558289	0.00132882	0.309517	0.000121273	0.000165267
IODIC	3L	10734158	NijA	FBgn0036101	44184	intergenic	FBgn0062835,CG6449,ninA,ninjurin A,Ninjurin A,NijA	13	0.0778443	13	T	C	T	6.67709e-06	0.212644	143	358.926	363.576	0.00697026	0.00148955	0.379912	0.000150005	0.00021933	4.68187e-05	0.591709	143	377.045	379.712	0.00558289	0.00132882	0.309517	0.000121273	0.000165267
IODIC	3L	12175730	CAH2		CAH2-cds	synonymous	FBgn0036261,CG6906,CT21171	15	0.0892857	16	T	A	T	1.65722e-06	0.136714	143	358.926	363.912	0.00745502	0.00149025	0.379912	0.000150005	0.00021933	0.000107862	0.651409	143	377.045	378.445	0.00539932	0.00135497	0.309517	0.000121273	0.000165267
IODIC	3L	13069155	CG17300	FBgn0036345	-10332	intergenic		13	0.0802469	12	C	T	C	5.051e-06	0.20989	143	358.926	363.594	0.00726645	0.00153129	0.379912	0.000150005	0.00021933	4.32596e-05	0.591709	143	377.045	379.602	0.00577409	0.00136778	0.309517	0.000121273	0.000165267
IODIC	3L	13069155	CG34429	FBgn0085458	12126	intergenic	FBan0014116,CG14116,FBgn0036344,CG14116	13	0.0802469	12	C	T	C	5.051e-06	0.20989	143	358.926	363.594	0.00726645	0.00153129	0.379912	0.000150005	0.00021933	4.32596e-05	0.591709	143	377.045	379.602	0.00577409	0.00136778	0.309517	0.000121273	0.000165267
IODIC	3L	15200832	CG6888		-112	intergenic	FBgn0065007,BcDNA:AT16346,6888	16	0.097561	13	G	C	G	4.63404e-05	0.429537	143	358.926	361.418	0.00649989	0.00154612	0.379912	0.000150005	0.00021933	3.09881e-06	0.29216	143	377.045	381.519	0.00645965	0.00132938	0.309517	0.000121273	0.000165267
IODIC	3L	15200832	CG6878		45261	intergenic		16	0.097561	13	G	C	G	4.63404e-05	0.429537	143	358.926	361.418	0.00649989	0.00154612	0.379912	0.000150005	0.00021933	3.09881e-06	0.29216	143	377.045	381.519	0.00645965	0.00132938	0.309517	0.000121273	0.000165267
IODIC	3L	15307036	Toll-6		-22764	intergenic	dToll6,toll,dTLR6,Tl-6,CT22359,18w-like,CG7250,toll receptor,TOLL 6,toll-6	24	0.155844	7	C	G	C	0.000356841	0.617201	143	358.926	359.701	0.00571825	0.00156277	0.379912	0.000150005	0.00021933	6.13349e-06	0.311378	143	377.045	381.519	0.00628559	0.00133749	0.309517	0.000121273	0.000165267
IODIC	3L	15307036	CG7255	FBgn0036493	2741	intergenic	CG7255-RC,CG7255-PC,CG7255-RA,CG7255-PA,CG7255-RB,CG7255-PB,CG7255-RD,CG7255-PD,CG7255-RE,CG7255-PE,FBtr0075609,FBpp0075362,FBtr0075610,FBpp0075363,FBtr0075611,FBpp0075364,FBtr0075612,FBpp0075365,FBtr0075613,FBpp0075366	24	0.155844	7	C	G	C	0.000356841	0.617201	143	358.926	359.701	0.00571825	0.00156277	0.379912	0.000150005	0.00021933	6.13349e-06	0.311378	143	377.045	381.519	0.00628559	0.00133749	0.309517	0.000121273	0.000165267
IODIC	3L	15307297	Toll-6		-22503	intergenic	dToll6,toll,dTLR6,Tl-6,CT22359,18w-like,CG7250,toll receptor,TOLL 6,toll-6	48	0.292683	13	T	C	T	0.0015325	0.746817	143	358.926	358.352	0.00513729	0.00158971	0.379912	0.000150005	0.00021933	9.76992e-06	0.46056	143	377.045	380.971	0.00620211	0.00135162	0.309517	0.000121273	0.000165267
IODIC	3L	15307297	CG7255	FBgn0036493	3002	intergenic	CG7255-RC,CG7255-PC,CG7255-RA,CG7255-PA,CG7255-RB,CG7255-PB,CG7255-RD,CG7255-PD,CG7255-RE,CG7255-PE,FBtr0075609,FBpp0075362,FBtr0075610,FBpp0075363,FBtr0075611,FBpp0075364,FBtr0075612,FBpp0075365,FBtr0075613,FBpp0075366	48	0.292683	13	T	C	T	0.0015325	0.746817	143	358.926	358.352	0.00513729	0.00158971	0.379912	0.000150005	0.00021933	9.76992e-06	0.46056	143	377.045	380.971	0.00620211	0.00135162	0.309517	0.000121273	0.000165267
IODIC	3L	17114489	Rbp6	FBgn0052169	Rbp6-in	intronic	FBgn0010260,FBgn0052169,FBgn0036699,FBgn0036700,FBgn0036701,FBgn0063045,RRM6,rrm6,BcDNA:RE25373,CG6573,CG14056,CG14055,CG32169	12	0.0727273	11	A	T	A	4.22934e-06	0.199374	143	358.926	363.525	0.00736437	0.00153845	0.379912	0.000150005	0.00021933	5.94718e-07	0.260314	143	377.045	383.119	0.00692943	0.00132445	0.309517	0.000121273	0.000165267
IODIC	3L	17114740	Rbp6	FBgn0052169	Rbp6-in	intronic	FBgn0010260,FBgn0052169,FBgn0036699,FBgn0036700,FBgn0036701,FBgn0063045,RRM6,rrm6,BcDNA:RE25373,CG6573,CG14056,CG14055,CG32169	12	0.0727273	11	C	T	C	6.42125e-05	0.453967	143	358.926	361.351	0.00657978	0.0015969	0.379912	0.000150005	0.00021933	5.27653e-06	0.310792	143	377.045	381.429	0.00644033	0.00136015	0.309517	0.000121273	0.000165267
IODIC	3L	17115580	Rbp6	FBgn0052169	Rbp6-in	intronic	FBgn0010260,FBgn0052169,FBgn0036699,FBgn0036700,FBgn0036701,FBgn0063045,RRM6,rrm6,BcDNA:RE25373,CG6573,CG14056,CG14055,CG32169	13	0.0787879	19	C	A	C	7.08498e-05	0.453967	143	358.926	361.255	0.00653798	0.00159662	0.379912	0.000150005	0.00021933	5.73364e-06	0.310792	143	377.045	381.35	0.00641542	0.0013605	0.309517	0.000121273	0.000165267
IODIC	3L	19097593	CG14082		-2782	intergenic		18	0.111111	13	A	G	A	7.1088e-06	0.213254	143	358.926	363.29	0.00721505	0.00154677	0.379912	0.000150005	0.00021933	0.000103455	0.651409	143	377.045	378.862	0.00554838	0.00138854	0.309517	0.000121273	0.000165267
IODIC	3L	19097593	Gem2	FBgn0036850	4159	intergenic	CG10419,dGemin2	18	0.111111	13	A	G	A	7.1088e-06	0.213254	143	358.926	363.29	0.00721505	0.00154677	0.379912	0.000150005	0.00021933	0.000103455	0.651409	143	377.045	378.862	0.00554838	0.00138854	0.309517	0.000121273	0.000165267
IODIC	3R	467488	CG18271	FBgn0037263	-208	intergenic	SLX1	21	0.128049	7	G	A	A	1.53789e-06	0.135328	143	358.926	364.337	0.00756784	0.00150769	0.379912	0.000150005	0.00021933	5.88648e-06	0.310792	143	377.045	381.221	0.00630418	0.00133868	0.309517	0.000121273	0.000165267
IODIC	3R	467488	CG9775	FBgn0037261	171	intergenic		21	0.128049	7	G	A	A	1.53789e-06	0.135328	143	358.926	364.337	0.00756784	0.00150769	0.379912	0.000150005	0.00021933	5.88648e-06	0.310792	143	377.045	381.221	0.00630418	0.00133868	0.309517	0.000121273	0.000165267
IODIC	3R	3271090	tRNA:V3b:84Db		-5929	intergenic	FBgn0003853,FBgn0011997,FBgn0051512,FBgn0060024,valine tRNA,tRNA[Val][[3b]],Val-3b,AE002699.trna12-ValCAC,tRNA:V3b,tRNA:V:CAC:AE002699-c,CR31512,tRNA:val3b:84Db	44	0.271605	12	G	A	G	5.93813e-06	0.212644	143	358.926	363.41	0.007264	0.00154317	0.379912	0.000150005	0.00021933	2.03826e-05	0.55945	143	377.045	380.211	0.00603269	0.00136803	0.309517	0.000121273	0.000165267
IODIC	3R	3271090	CG14598		3376	intergenic		44	0.271605	12	G	A	G	5.93813e-06	0.212644	143	358.926	363.41	0.007264	0.00154317	0.379912	0.000150005	0.00021933	2.03826e-05	0.55945	143	377.045	380.211	0.00603269	0.00136803	0.309517	0.000121273	0.000165267
IODIC	3R	3271111	tRNA:V3b:84Db		-5908	intergenic	FBgn0003853,FBgn0011997,FBgn0051512,FBgn0060024,valine tRNA,tRNA[Val][[3b]],Val-3b,AE002699.trna12-ValCAC,tRNA:V3b,tRNA:V:CAC:AE002699-c,CR31512,tRNA:val3b:84Db	43	0.265432	14	C	T	C	6.66212e-06	0.212644	143	358.926	363.204	0.00734548	0.00156955	0.379912	0.000150005	0.00021933	1.12896e-05	0.49672	143	377.045	380.653	0.00630479	0.00138449	0.309517	0.000121273	0.000165267
IODIC	3R	3271111	CG14598		3397	intergenic		43	0.265432	14	C	T	C	6.66212e-06	0.212644	143	358.926	363.204	0.00734548	0.00156955	0.379912	0.000150005	0.00021933	1.12896e-05	0.49672	143	377.045	380.653	0.00630479	0.00138449	0.309517	0.000121273	0.000165267
IODIC	3R	3271914	tRNA:V3b:84Db		-5105	intergenic	FBgn0003853,FBgn0011997,FBgn0051512,FBgn0060024,valine tRNA,tRNA[Val][[3b]],Val-3b,AE002699.trna12-ValCAC,tRNA:V3b,tRNA:V:CAC:AE002699-c,CR31512,tRNA:val3b:84Db	34	0.209877	13	G	T	G	1.39642e-06	0.131656	143	358.926	364.513	0.00762471	0.00151244	0.379912	0.000150005	0.00021933	2.21851e-06	0.262645	143	377.045	382.116	0.00658335	0.00133373	0.309517	0.000121273	0.000165267
IODIC	3R	3271914	CG14598		4200	intergenic		34	0.209877	13	G	T	G	1.39642e-06	0.131656	143	358.926	364.513	0.00762471	0.00151244	0.379912	0.000150005	0.00021933	2.21851e-06	0.262645	143	377.045	382.116	0.00658335	0.00133373	0.309517	0.000121273	0.000165267
IODIC	3R	3441313	CG34127	FBgn0083963	CG34127-in	intronic	CG14597,FBan0032465,CG32465,FBgn0037507,FBgn0037508,FBgn0037509,FBgn0052465,CG32465,CG18291,CG14597,CG1062,Drosokinin receptor	12	0.0727273	9	C	T	C	4.03443e-06	0.199374	143	358.926	363.274	0.0072937	0.00152019	0.379912	0.000150005	0.00021933	5.77325e-05	0.591709	143	377.045	379.289	0.00570043	0.00137434	0.309517	0.000121273	0.000165267
IODIC	3R	15544913	GluClalpha	FBgn0024963	-11768	intergenic	FBgn0063176,CG7535-RA,CG7535-PA,CG7535-RB,CG7535-PB,CG7535-RC,DrosGluCl-alpha1,dGluCl-alpha,CG7535,GluCla,DmGlu,DrosGlu-Cl-alpha,DmGluClalpha,GluCl,glc,DrosGluCl-alpha,indefinite,DrosGluCl,GLUCL,GluClalpha,BcDNA:HL07853,Dm-GluCl	28	0.175	7	G	T	G	7.29022e-06	0.213702	143	358.926	363.55	0.00736556	0.00158107	0.379912	0.000150005	0.00021933	0.000110003	0.651409	143	377.045	378.964	0.00565494	0.00142097	0.309517	0.000121273	0.000165267
IODIC	3R	15544913	CG34286	FBgn0085315	3264	intergenic		28	0.175	7	G	T	G	7.29022e-06	0.213702	143	358.926	363.55	0.00736556	0.00158107	0.379912	0.000150005	0.00021933	0.000110003	0.651409	143	377.045	378.964	0.00565494	0.00142097	0.309517	0.000121273	0.000165267
IODIC	3R	16306114	CG4323		-19650	intergenic		14	0.0869565	9	C	T	C	3.02946e-06	0.173856	143	358.926	363.737	0.00739692	0.00152063	0.379912	0.000150005	0.00021933	1.34068e-05	0.501887	143	377.045	380.113	0.0060601	0.00134303	0.309517	0.000121273	0.000165267
IODIC	3R	16306114	CG10881	FBgn0038796	71155	intergenic	eIF3-S4,cg10881	14	0.0869565	9	C	T	C	3.02946e-06	0.173856	143	358.926	363.737	0.00739692	0.00152063	0.379912	0.000150005	0.00021933	1.34068e-05	0.501887	143	377.045	380.113	0.0060601	0.00134303	0.309517	0.000121273	0.000165267
IODIC	3R	16306114	CG42801	FBgn0261970	CG42801-in	intronic	CG17208,CG34118,CG17205,FBgn0083954,FBan0017205,FBgn0038794,FBgn0064953,FBgn0040573,CG17205,BcDNA:GH26447,CG34118,CG17208	14	0.0869565	9	C	T	C	3.02946e-06	0.173856	143	358.926	363.737	0.00739692	0.00152063	0.379912	0.000150005	0.00021933	1.34068e-05	0.501887	143	377.045	380.113	0.0060601	0.00134303	0.309517	0.000121273	0.000165267
IODIC	3R	16306196	CG4323		-19568	intergenic		15	0.0914634	13	A	G	A	6.01573e-06	0.212644	143	358.926	363.221	0.00712782	0.00151523	0.379912	0.000150005	0.00021933	2.67646e-05	0.591709	143	377.045	379.588	0.00581169	0.0013384	0.309517	0.000121273	0.000165267
IODIC	3R	16306196	CG10881	FBgn0038796	71237	intergenic	eIF3-S4,cg10881	15	0.0914634	13	A	G	A	6.01573e-06	0.212644	143	358.926	363.221	0.00712782	0.00151523	0.379912	0.000150005	0.00021933	2.67646e-05	0.591709	143	377.045	379.588	0.00581169	0.0013384	0.309517	0.000121273	0.000165267
IODIC	3R	16306196	CG42801	FBgn0261970	CG42801-in	intronic	CG17208,CG34118,CG17205,FBgn0083954,FBan0017205,FBgn0038794,FBgn0064953,FBgn0040573,CG17205,BcDNA:GH26447,CG34118,CG17208	15	0.0914634	13	A	G	A	6.01573e-06	0.212644	143	358.926	363.221	0.00712782	0.00151523	0.379912	0.000150005	0.00021933	2.67646e-05	0.591709	143	377.045	379.588	0.00581169	0.0013384	0.309517	0.000121273	0.000165267
IODIC	3R	16989113	CG5810		-399	intergenic	CT18214	62	0.394904	15	G	A	A	0.000148867	0.532038	143	358.926	360.655	-0.00623599	0.00159939	0.379912	0.000150005	0.00021933	4.45273e-06	0.301463	143	377.045	381.813	-0.00651197	0.00136381	0.309517	0.000121273	0.000165267
IODIC	3R	16989113	CG10824	FBgn0038865	2298	intergenic	CT11359	62	0.394904	15	G	A	A	0.000148867	0.532038	143	358.926	360.655	-0.00623599	0.00159939	0.379912	0.000150005	0.00021933	4.45273e-06	0.301463	143	377.045	381.813	-0.00651197	0.00136381	0.309517	0.000121273	0.000165267
IODIC	3R	16989113	SNF4Agamma	FBgn0025803	SNF4Agamma-in	intronic	FBgn0038864,FBgn0043354,FBgn0061867,FBgn0062083,FBgn0063797,Snfgamma,loe,Snfg,Lochrig,loechrig,SNF4Ag,SNF4A,lochrig,FBgn0025803,SNF4a,CG17299,EP3015b,SNF4,SNF4/AMP-activated protein kinase gamma,CG5806,anon-WO0257455.21,anon-WO0118547.575,anon-WO0118547.338,SNF4Agamma,AMP-activated protein kinase gamma subunit,AMPgamma	62	0.394904	15	G	A	A	0.000148867	0.532038	143	358.926	360.655	-0.00623599	0.00159939	0.379912	0.000150005	0.00021933	4.45273e-06	0.301463	143	377.045	381.813	-0.00651197	0.00136381	0.309517	0.000121273	0.000165267
IODIC	3R	16989117	CG5810		-395	intergenic	CT18214	62	0.394904	15	T	A	A	0.000132794	0.517123	143	358.926	360.75	-0.00628517	0.00159945	0.379912	0.000150005	0.00021933	5.07505e-06	0.310792	143	377.045	381.71	-0.00648832	0.00136764	0.309517	0.000121273	0.000165267
IODIC	3R	16989117	CG10824	FBgn0038865	2302	intergenic	CT11359	62	0.394904	15	T	A	A	0.000132794	0.517123	143	358.926	360.75	-0.00628517	0.00159945	0.379912	0.000150005	0.00021933	5.07505e-06	0.310792	143	377.045	381.71	-0.00648832	0.00136764	0.309517	0.000121273	0.000165267
IODIC	3R	16989117	SNF4Agamma	FBgn0025803	SNF4Agamma-in	intronic	FBgn0038864,FBgn0043354,FBgn0061867,FBgn0062083,FBgn0063797,Snfgamma,loe,Snfg,Lochrig,loechrig,SNF4Ag,SNF4A,lochrig,FBgn0025803,SNF4a,CG17299,EP3015b,SNF4,SNF4/AMP-activated protein kinase gamma,CG5806,anon-WO0257455.21,anon-WO0118547.575,anon-WO0118547.338,SNF4Agamma,AMP-activated protein kinase gamma subunit,AMPgamma	62	0.394904	15	T	A	A	0.000132794	0.517123	143	358.926	360.75	-0.00628517	0.00159945	0.379912	0.000150005	0.00021933	5.07505e-06	0.310792	143	377.045	381.71	-0.00648832	0.00136764	0.309517	0.000121273	0.000165267
IODIC	3R	19570657	Hmgcr	FBgn0001205	Hmgcr-in	intronic	FBgn0010738,FBgn0024247,FBgn0061415,columbus,HMG-CoA reductase,3-hydroxy-3-methylglutaryl coenzyme A reductase,HMGCoAr,hmgcr,HMGCoARr,l(3)01152,clb,HMGCR_Dm,CG10367,DmHMG-CoAr,HMGCoAR,bs32f05.y1,HmG-CoAR,unnamed,HMGCo-A reductase,Clb,Hmg,BcDNA:LD15354,HMGCR,bro1,HMGCoA reductase,3-Hydroxy-3-Methylglutaryl CoA Reductase,hmgc,Hmg-CoA-reductase,hmgrc	13	0.0792683	16	A	G	A	5.08848e-06	0.20989	143	358.926	363.794	-0.00716636	0.00151076	0.379912	0.000150005	0.00021933	1.42982e-05	0.501887	143	377.045	380.712	-0.00600692	0.00133587	0.309517	0.000121273	0.000165267
IODIC	3R	26963968	Gycbeta100B	FBgn0013973	Gycbeta100B-in	intronic	CG1470,Gycbeta-100B,Dgc beta 1,dgcb1,dgcbeta1,Gycbeta100B,gycbeta100B	27	0.160714	16	A	C	A	6.90584e-06	0.212644	143	358.926	363.21	0.00707315	0.00151412	0.379912	0.000150005	0.00021933	6.76898e-06	0.330912	143	377.045	381.335	0.00623199	0.0013327	0.309517	0.000121273	0.000165267
IODIC	X	5066914	rg	FBgn0086911	rg-in	intronic	FBgn0003244,FBgn0021748,FBgn0040912,CG15466,Akap550,DAKAP550,Drosophila A kinase anchor protein,A kinase anchor protein 550,facetious,fas,CG15466,pebbled,CG6775,AKAP	32	0.193939	7	T	C	T	8.4418e-06	0.237078	143	358.926	363.027	0.00706185	0.00152733	0.379912	0.000150005	0.00021933	1.21635e-06	0.260314	143	377.045	382.945	0.00672678	0.00132614	0.309517	0.000121273	0.000165267
IODIC	X	5066914	CG15465	FBgn0029746	CG15465-in	intronic	FBgn0003244,FBgn0021748,FBgn0040912,CG15466,Akap550,DAKAP550,Drosophila A kinase anchor protein,A kinase anchor protein 550,facetious,fas,CG15466,pebbled,CG6775,AKAP	32	0.193939	7	T	C	T	8.4418e-06	0.237078	143	358.926	363.027	0.00706185	0.00152733	0.379912	0.000150005	0.00021933	1.21635e-06	0.260314	143	377.045	382.945	0.00672678	0.00132614	0.309517	0.000121273	0.000165267
IODIC	X	5066914	rg	FBgn0086911	rg-in	intronic	FBgn0003244,FBgn0021748,FBgn0040912,CG15466,Akap550,DAKAP550,Drosophila A kinase anchor protein,A kinase anchor protein 550,facetious,fas,CG15466,pebbled,CG6775,AKAP	32	0.193939	7	T	C	T	8.4418e-06	0.237078	143	358.926	363.027	0.00706185	0.00152733	0.379912	0.000150005	0.00021933	1.21635e-06	0.260314	143	377.045	382.945	0.00672678	0.00132614	0.309517	0.000121273	0.000165267
IODIC	X	5066914	CG15465	FBgn0029746	CG15465-in	intronic	FBgn0003244,FBgn0021748,FBgn0040912,CG15466,Akap550,DAKAP550,Drosophila A kinase anchor protein,A kinase anchor protein 550,facetious,fas,CG15466,pebbled,CG6775,AKAP	32	0.193939	7	T	C	T	8.4418e-06	0.237078	143	358.926	363.027	0.00706185	0.00152733	0.379912	0.000150005	0.00021933	1.21635e-06	0.260314	143	377.045	382.945	0.00672678	0.00132614	0.309517	0.000121273	0.000165267
IODIC	X	7318074	CG15036	FBgn0040922	-486	intergenic		31	0.186747	9	C	A	C	4.66767e-06	0.205367	143	358.926	363.654	0.00718215	0.00150765	0.379912	0.000150005	0.00021933	3.22115e-05	0.591709	143	377.045	379.912	0.00577436	0.00134414	0.309517	0.000121273	0.000165267
IODIC	X	7318074	CG9657	FBgn0029950	2402	intergenic		31	0.186747	9	C	A	C	4.66767e-06	0.205367	143	358.926	363.654	0.00718215	0.00150765	0.379912	0.000150005	0.00021933	3.22115e-05	0.591709	143	377.045	379.912	0.00577436	0.00134414	0.309517	0.000121273	0.000165267
IODIC	X	15281434	cngl		-2205	intergenic	FBgn0030635,CG9176,cng-like	74	0.45122	10	G	A	A	2.20069e-05	0.361258	143	358.926	362.282	-0.00674047	0.00153512	0.379912	0.000150005	0.00021933	3.38276e-06	0.294183	143	377.045	382.002	-0.00645582	0.00133416	0.309517	0.000121273	0.000165267
IODIC	X	15281434	CG9164		1995	intergenic		74	0.45122	10	G	A	A	2.20069e-05	0.361258	143	358.926	362.282	-0.00674047	0.00153512	0.379912	0.000150005	0.00021933	3.38276e-06	0.294183	143	377.045	382.002	-0.00645582	0.00133416	0.309517	0.000121273	0.000165267

## Sheet: rCS
														FEMALES										MALES
Phenotype	Chromosome	Position	Gene Symbol	FlyBase ID	SNP Location	Site Class	Alias	Lines with minor allele	MAF	Mean Coverage	Major Allele	Minor Allele	Reference SNP	Pvalue	Qvalue	N	Null Log Likelihood	Alternative Log Likelihood	SNP Fixed effect	SNP Fixed effect SE	Null Log (σ2E/σ2G)	Null Genetic Variance (σ2G)	Null Residual Variance (σ2E)	Pvalue	Qvalue	N	Null Log Likelihood	Alternative Log Likelihood	SNP Fixed effect	SNP Fixed effect SE	Null Log (σ2E/σ2G)	Null Genetic Variance (σ2G)	Null Residual Variance (σ2E)
rCS	2L	1676975	chinmo	FBgn0086758	chinmo-in	intronic	FBgn0082597,FBgn0010566,FBgn0051666,FBgn0031353,FBgn0031354,FBgn0031355,Chinmo,chronologically inappropriate morphogenesis,F,unnamed,lethal (2) 04111,l(2)04111,CG10871,CG17156,CG17649,CG31666	22	0.134146	10	G	A	G	6.7635e-06	0.323784	143	189.868	195.407	-0.0240659	0.00514623	-1.07005	0.00307674	0.0010553	1.84966e-05	0.544673	143	207.792	212.576	-0.0208761	0.00470853	-5	0.00330788	2.22883e-05
rCS	2L	1676992	chinmo	FBgn0086758	chinmo-in	intronic	FBgn0082597,FBgn0010566,FBgn0051666,FBgn0031353,FBgn0031354,FBgn0031355,Chinmo,chronologically inappropriate morphogenesis,F,unnamed,lethal (2) 04111,l(2)04111,CG10871,CG17156,CG17649,CG31666	22	0.134146	13	A	T	A	4.13133e-06	0.32077	143	189.868	195.816	-0.0246389	0.0051413	-1.07005	0.00307674	0.0010553	1.02977e-05	0.537992	143	207.792	213.129	-0.0215328	0.00470556	-5	0.00330788	2.22883e-05
rCS	2L	4697386	CG34351	FBgn0085380	CG34351-in	intronic	CG15633,FBgn0031625,FBgn0031624,CG11928,CG11928,CG15633	23	0.142857	15	T	C	C	0.000588571	0.68645	143	189.868	191.46	0.0187821	0.00534111	-1.07005	0.00307674	0.0010553	4.86356e-06	0.515091	143	207.792	213.87	0.0215749	0.0045381	-5	0.00330788	2.22883e-05
rCS	2L	8790517	CG42712	FBgn0261629	-18883	intergenic		15	0.0931677	13	C	T	C	1.12625e-06	0.195728	143	189.868	196.075	-0.0258833	0.00508538	-1.07005	0.00307674	0.0010553	1.00473e-06	0.515091	143	207.792	213.28	-0.0229785	0.00449206	-5	0.00330788	2.22883e-05
rCS	2L	8790517	CG42710		8023	intergenic	HDC01517	15	0.0931677	13	C	T	C	1.12625e-06	0.195728	143	189.868	196.075	-0.0258833	0.00508538	-1.07005	0.00307674	0.0010553	1.00473e-06	0.515091	143	207.792	213.28	-0.0229785	0.00449206	-5	0.00330788	2.22883e-05
rCS	2L	9011992	CG13102	FBgn0032088	-201	intergenic	FBgn0062998,BcDNA:RE57454	11	0.0743243	8	A	G	A	7.27983e-06	0.323784	143	189.868	194.935	-0.0244212	0.00524178	-1.07005	0.00307674	0.0010553	6.9402e-06	0.537992	143	207.792	212.528	-0.0217427	0.00465554	-5	0.00330788	2.22883e-05
rCS	2L	9011992	CG9568	FBgn0032087	650	intergenic	FBgn0044693,anon-WO0140519.183,FBgn 32087	11	0.0743243	8	A	G	A	7.27983e-06	0.323784	143	189.868	194.935	-0.0244212	0.00524178	-1.07005	0.00307674	0.0010553	6.9402e-06	0.537992	143	207.792	212.528	-0.0217427	0.00465554	-5	0.00330788	2.22883e-05
rCS	2L	9011993	CG13102	FBgn0032088	-200	intergenic	FBgn0062998,BcDNA:RE57454	12	0.0805369	8	A	T	A	7.27983e-06	0.323784	143	189.868	194.935	-0.0244212	0.00524178	-1.07005	0.00307674	0.0010553	6.9402e-06	0.537992	143	207.792	212.528	-0.0217427	0.00465554	-5	0.00330788	2.22883e-05
rCS	2L	9011993	CG9568	FBgn0032087	651	intergenic	FBgn0044693,anon-WO0140519.183,FBgn 32087	12	0.0805369	8	A	T	A	7.27983e-06	0.323784	143	189.868	194.935	-0.0244212	0.00524178	-1.07005	0.00307674	0.0010553	6.9402e-06	0.537992	143	207.792	212.528	-0.0217427	0.00465554	-5	0.00330788	2.22883e-05
rCS	2L	9443434	Gdi		-48484	intergenic	FBgn0010224,FBgn0014258,CG4422,GDI,Gdi-related,N7-3,rab GDP dissociation inhibitor,dGDI,rab GDI,l(2)N7-3,GdI,Rab GDP dissociation inhibitor	11	0.0674847	15	T	C	C	0.000149182	0.516032	143	189.868	192.315	-0.0208434	0.00534663	-1.07005	0.00307674	0.0010553	9.14624e-06	0.537992	143	207.792	212.98	-0.0221213	0.00480429	-5	0.00330788	2.22883e-05
rCS	2L	9443434	CG33723		2694	intergenic	FBgn0010532,FBgn0010684,Numb,dNumb,CG3779,nb,N7-1,d-Numb,d-numb,l(2)3235,l(2)03235,l(2)s2201,Nb,numbs	11	0.0674847	15	T	C	C	0.000149182	0.516032	143	189.868	192.315	-0.0208434	0.00534663	-1.07005	0.00307674	0.0010553	9.14624e-06	0.537992	143	207.792	212.98	-0.0221213	0.00480429	-5	0.00330788	2.22883e-05
rCS	2L	9443434	numb		numb-in	intronic	FBgn0010532,FBgn0010684,Numb,dNumb,CG3779,nb,N7-1,d-Numb,d-numb,l(2)3235,l(2)03235,l(2)s2201,Nb,numbs	11	0.0674847	15	T	C	C	0.000149182	0.516032	143	189.868	192.315	-0.0208434	0.00534663	-1.07005	0.00307674	0.0010553	9.14624e-06	0.537992	143	207.792	212.98	-0.0221213	0.00480429	-5	0.00330788	2.22883e-05
rCS	2L	13872975	Smg5		-26378	intergenic	FBgn0027901,CG8954,SMG5,anon-34Ea,unnamed,BG:DS08220.2,dSMG5	28	0.215385	6	T	A	T	9.91123e-06	0.323784	143	189.868	194.929	-0.022806	0.0049738	-1.07005	0.00307674	0.0010553	0.000953343	0.851646	143	207.792	208.823	-0.0152118	0.00450704	-5	0.00330788	2.22883e-05
rCS	2L	13872975	CG7968		22648	intergenic	FBgn0027848,DS00941.15,BG:DS00941.15	28	0.215385	6	T	A	T	9.91123e-06	0.323784	143	189.868	194.929	-0.022806	0.0049738	-1.07005	0.00307674	0.0010553	0.000953343	0.851646	143	207.792	208.823	-0.0152118	0.00450704	-5	0.00330788	2.22883e-05
rCS	2L	13872975	cenG1A		cenG1A-in	intronic	FBgn0027879,FBgn0032534,FBgn0040976,FBgn0051811,ceng1A,unnamed,BG:DS08220.1,CG7982,CG16867,CG16866,CG31811,CenG1A,cenG1a	28	0.215385	6	T	A	T	9.91123e-06	0.323784	143	189.868	194.929	-0.022806	0.0049738	-1.07005	0.00307674	0.0010553	0.000953343	0.851646	143	207.792	208.823	-0.0152118	0.00450704	-5	0.00330788	2.22883e-05
rCS	2L	13946966	Ance-3		Ance-3-in	intronic	CG31766-RB,CG31766-RA,CG31766-PA,CG31766-PB,CG31766,CG17988-RA,CG17988-PA,FBgn0028937,FBgn0051766,FBgn0051843,CG17988,CT40163,BG:DS00180.5,DS00180.5,CG31766,CG31843	27	0.170886	14	G	A	G	3.36348e-07	0.1799	143	189.868	198.508	-0.0265117	0.00494913	-1.07005	0.00307674	0.0010553	2.0155e-06	0.515091	143	207.792	214.691	-0.0217737	0.00439164	-5	0.00330788	2.22883e-05
rCS	2L	13946966	CG16884	FBgn0028544	CG16884-in	intronic	FBgn0027907,BG:DS00180.3	27	0.170886	14	G	A	G	3.36348e-07	0.1799	143	189.868	198.508	-0.0265117	0.00494913	-1.07005	0.00307674	0.0010553	2.0155e-06	0.515091	143	207.792	214.691	-0.0217737	0.00439164	-5	0.00330788	2.22883e-05
rCS	2L	18908808	ssp3		-7717	intergenic	FBgn0032722,CG10666,CG18397,Ssp3	16	0.0993789	19	G	T	G	3.19325e-05	0.372999	143	189.868	194.23	-0.0222819	0.00518409	-1.07005	0.00307674	0.0010553	9.37536e-06	0.537992	143	207.792	213.186	-0.0210879	0.00458576	-5	0.00330788	2.22883e-05
rCS	2L	18908808	tup		27552	intergenic	FBgn0002017,FBgn0015395,CG10619,islet,Islet 1,Islet,isl,Isl,lethal(2)37Aa,l(2)E41,l(2)37Aa,tailup/islet,Tup,dIslet	16	0.0993789	19	G	T	G	3.19325e-05	0.372999	143	189.868	194.23	-0.0222819	0.00518409	-1.07005	0.00307674	0.0010553	9.37536e-06	0.537992	143	207.792	213.186	-0.0210879	0.00458576	-5	0.00330788	2.22883e-05
rCS	2L	19715501	CG10462	FBgn0032815	-16579	intergenic	FBgn0062418,CG10462-RA,CG10462-PA,BcDNA:SD07008	22	0.134969	14	C	T	C	6.11468e-06	0.323784	143	189.868	195.104	-0.0237442	0.00505166	-1.07005	0.00307674	0.0010553	1.10049e-05	0.537992	143	207.792	212.344	-0.0204358	0.00448151	-5	0.00330788	2.22883e-05
rCS	2L	19715501	scw	FBgn0005590	14466	intergenic	FBgn0002053,FBgn0003343,FBgn0046219,FBgn0051695,Scw,l(2)37Ff,CG31695,l(2)IG76,BcDNA:LD30945,Screw,SCW	22	0.134969	14	C	T	C	6.11468e-06	0.323784	143	189.868	195.104	-0.0237442	0.00505166	-1.07005	0.00307674	0.0010553	1.10049e-05	0.537992	143	207.792	212.344	-0.0204358	0.00448151	-5	0.00330788	2.22883e-05
rCS	2L	19715501	Lar	FBgn0000464	Lar-in	intronic	FBgn0010057,bypass,Dlar,LAR,DLAR,dlar,DLar,CG10443,PTP38A,leukocyte-antigen-related-like,LAR receptor tyrosine phosphatase	22	0.134969	14	C	T	C	6.11468e-06	0.323784	143	189.868	195.104	-0.0237442	0.00505166	-1.07005	0.00307674	0.0010553	1.10049e-05	0.537992	143	207.792	212.344	-0.0204358	0.00448151	-5	0.00330788	2.22883e-05
rCS	2R	5234075	Or45a		Or45a:2	synonymous	CG1978,45a,DOR58,45C.1	53	0.335443	15	G	T	T	4.48342e-06	0.323784	143	189.868	195.531	-0.0246817	0.00517086	-1.07005	0.00307674	0.0010553	7.07564e-05	0.607995	143	207.792	210.39	-0.0191422	0.00467429	-5	0.00330788	2.22883e-05
rCS	2R	5234075	CG13739		CG13739-in	synonymous	FBgn0046789,BcDNA:GH21254	53	0.335443	15	G	T	T	4.48342e-06	0.323784	143	189.868	195.531	-0.0246817	0.00517086	-1.07005	0.00307674	0.0010553	7.07564e-05	0.607995	143	207.792	210.39	-0.0191422	0.00467429	-5	0.00330788	2.22883e-05
rCS	2R	8452798	Cyp301a1		-894	intergenic	301a1,CG8587,cytochrome P450	22	0.151724	6	C	A	C	3.71237e-06	0.319021	143	189.868	196.312	-0.0244139	0.00506801	-1.07005	0.00307674	0.0010553	0.000551738	0.814608	143	207.792	209.356	-0.0162465	0.0045957	-5	0.00330788	2.22883e-05
rCS	2R	8452798	CG33775		392	intergenic	FBgn0082872,unnamed,BP1034	22	0.151724	6	C	A	C	3.71237e-06	0.319021	143	189.868	196.312	-0.0244139	0.00506801	-1.07005	0.00307674	0.0010553	0.000551738	0.814608	143	207.792	209.356	-0.0162465	0.0045957	-5	0.00330788	2.22883e-05
rCS	2R	11409464	Khc-73		Khc-73-in	intronic	FBgn0025191,kinesin-73,CG8183,DmKlp73,DmKIN73,unnamed,anon-fast-evolving-3C9,anon-EST:fe3C9,Kinesin-73,Kinesin-3	78	0.478528	14	G	C	G	8.1879e-06	0.323784	143	189.868	195.552	0.0234927	0.00507298	-1.07005	0.00307674	0.0010553	0.000220599	0.747981	143	207.792	210.069	0.0173603	0.00457767	-5	0.00330788	2.22883e-05
rCS	2R	11409467	Khc-73		Khc-73-in	intronic	FBgn0025191,kinesin-73,CG8183,DmKlp73,DmKIN73,unnamed,anon-fast-evolving-3C9,anon-EST:fe3C9,Kinesin-73,Kinesin-3	77	0.472393	15	A	C	A	5.3136e-06	0.323784	143	189.868	195.96	0.0237496	0.00501747	-1.07005	0.00307674	0.0010553	0.000278349	0.770495	143	207.792	209.805	0.0169635	0.00454987	-5	0.00330788	2.22883e-05
rCS	2R	11409484	Khc-73		Khc-73-in	intronic	FBgn0025191,kinesin-73,CG8183,DmKlp73,DmKIN73,unnamed,anon-fast-evolving-3C9,anon-EST:fe3C9,Kinesin-73,Kinesin-3	77	0.475309	17	T	C	T	3.86711e-06	0.319021	143	189.868	196.266	0.0240728	0.00500708	-1.07005	0.00307674	0.0010553	0.000181634	0.734379	143	207.792	210.193	0.0174494	0.00453781	-5	0.00330788	2.22883e-05
rCS	2R	11409504	Khc-73		Khc-73-in	intronic	FBgn0025191,kinesin-73,CG8183,DmKlp73,DmKIN73,unnamed,anon-fast-evolving-3C9,anon-EST:fe3C9,Kinesin-73,Kinesin-3	79	0.481707	16	T	C	T	8.49916e-06	0.323784	143	189.868	195.506	0.0231952	0.00501838	-1.07005	0.00307674	0.0010553	0.000372078	0.780922	143	207.792	209.538	0.0165772	0.00454507	-5	0.00330788	2.22883e-05
rCS	2R	11575928	Cep89	FBgn0034037	Cep89:2	missense		19	0.113095	15	T	C	T	5.53159e-05	0.442919	143	189.868	193.742	-0.0218354	0.00525051	-1.07005	0.00307674	0.0010553	4.78198e-06	0.515091	143	207.792	213.907	-0.0220334	0.00463067	-5	0.00330788	2.22883e-05
rCS	2R	12994951	CG30456	FBgn0050456	CG30456-u3	UTR	FBgn0034192,FBgn0034193,CG15612,CG15613	14	0.0843373	14	A	G	A	3.11734e-06	0.30677	143	189.868	196.316	-0.0234739	0.00483224	-1.07005	0.00307674	0.0010553	4.50305e-05	0.604567	143	207.792	211.675	-0.0181594	0.00431208	-5	0.00330788	2.22883e-05
rCS	2R	13556739	eIF3-S8		eIF3-S8-u3	UTR	CG4954	17	0.10303	11	T	C	T	2.90693e-06	0.30677	143	189.868	195.575	-0.0242287	0.00497108	-1.07005	0.00307674	0.0010553	0.000663561	0.824269	143	207.792	208.935	-0.0163101	0.00468447	-5	0.00330788	2.22883e-05
rCS	2R	17894354	CG34370	FBgn0085399	CG34370-in	intronic	CG34004,FBgn0082869,FBgn0034680,FBgn0050405,FBgn0054004,FBgn0034678,FBgn0034679,FBgn0050408,FBgn0053227,CG33227,CG13499,CG13499,tld-like,CT32866,CG13498,CG13497,CG30408,CG30405,CG33227,unnamed,BP1037,CG34004	31	0.190184	16	A	G	A	0.000126682	0.497726	143	189.868	192.849	-0.0200432	0.00508433	-1.07005	0.00307674	0.0010553	7.4837e-07	0.515091	143	207.792	215.3	-0.0224738	0.0043377	-5	0.00330788	2.22883e-05
rCS	2R	20605740	Mid1		Mid1-in	intronic	CG13595,CG13596,CG13596-PA,CG18510-PA,CG13595-PA,CG13595-RA,CG18510,CG13596-RA,CG18510-RA,FBgn0035051,FBgn0035052,FBgn0035053,FBtr0072438,FBpp0072343,FBtr0072439,FBpp0072344,FBtr0072440,FBpp0072345,CG18510,CG13596,CG13595,cg13596	34	0.208589	11	G	C	G	1.38099e-05	0.323784	143	189.868	195.055	-0.0234987	0.00521605	-1.07005	0.00307674	0.0010553	7.46651e-06	0.537992	143	207.792	213.421	-0.0214921	0.00461906	-5	0.00330788	2.22883e-05
rCS	3L	536533	CG17180	FBgn0035140	-4318	intergenic		25	0.149701	13	G	A	A	0.000263954	0.625499	143	189.868	191.991	-0.0192437	0.00514121	-1.07005	0.00307674	0.0010553	8.47977e-06	0.537992	143	207.792	213.201	-0.0207973	0.00449907	-5	0.00330788	2.22883e-05
rCS	3L	536533	CG34269	FBgn0085298	7537	intergenic	FBgn0002650,marbles,kls,Klar,CG17046,marb,Klarsicht	25	0.149701	13	G	A	A	0.000263954	0.625499	143	189.868	191.991	-0.0192437	0.00514121	-1.07005	0.00307674	0.0010553	8.47977e-06	0.537992	143	207.792	213.201	-0.0207973	0.00449907	-5	0.00330788	2.22883e-05
rCS	3L	536533	klar	FBgn0001316	klar-in	intronic	FBgn0002650,marbles,kls,Klar,CG17046,marb,Klarsicht	25	0.149701	13	G	A	A	0.000263954	0.625499	143	189.868	191.991	-0.0192437	0.00514121	-1.07005	0.00307674	0.0010553	8.47977e-06	0.537992	143	207.792	213.201	-0.0207973	0.00449907	-5	0.00330788	2.22883e-05
rCS	3L	1587762	CG13917	FBgn0035237	CG13917-in	intergenic		13	0.077381	20	C	T	C	8.44573e-06	0.323784	143	189.868	195.044	-0.0232727	0.00503352	-1.07005	0.00307674	0.0010553	8.40128e-05	0.646924	143	207.792	210.713	-0.0184297	0.00454997	-5	0.00330788	2.22883e-05
rCS	3L	4817350	Dhc64C	FBgn0010349	Dhc64C:8	nonsense	FBgn0010349,FBgn0001059,FBgn0003565,Dhc,dynein heavy chain,dynein,Cytoplasmic dynein,cytoplasmic dynein,cytoplasmic dynenin,cytoplasmic dynein heavy chain,dhc,dhc64C,Dhc64,DHC,Dhc64c,cDhc,DHC64C,CG7507,Laborc,CD,cDhc64C,Cdhc,Fs(3)Lab,HMW MAP,Lab,Fs(3)Laborc,Female sterile(3)Laborc,Cytoplasmic dynein heavy chain,l(3)64Ca,Fs(3)Sz18,Dynein heavy chain,dynein heavy chain 64C,cytoplasmic Dynein heavy …	28	0.167665	18	G	A	G	5.44631e-06	0.323784	143	189.868	194.68	-0.0238201	0.00503853	-1.07005	0.00307674	0.0010553	1.34671e-05	0.544673	143	207.792	212.149	-0.0206133	0.00456939	-5	0.00330788	2.22883e-05
rCS	3L	9843520	Gap1		Gap1-in	intronic	FBgn0005621,gap,CG6721,gap1,GAP1,Gap,Ras-GAP,sextra,mip,GAP,rI533,sxt,rasGAP,seven extra,more inner photoreceptors,GTPase activating protein1,GTPase activating protein 1,Gap 1	36	0.218182	11	C	A	C	8.25221e-06	0.323784	143	189.868	195.488	-0.0239206	0.00516747	-1.07005	0.00307674	0.0010553	3.0757e-05	0.583083	143	207.792	212.116	-0.0201629	0.00468085	-5	0.00330788	2.22883e-05
rCS	3L	11599330	CG6091	FBgn0036180	CG6091-in	intronic	ped	32	0.192771	23	G	C	G	6.668e-06	0.323784	143	189.868	195.476	-0.0234522	0.00501139	-1.07005	0.00307674	0.0010553	0.000466615	0.801956	143	207.792	209.45	-0.0164317	0.00458582	-5	0.00330788	2.22883e-05
rCS	3L	11599333	CG6091	FBgn0036180	CG6091-in	intronic	ped	32	0.192771	23	G	A	G	2.34658e-06	0.281576	143	189.868	196.363	-0.0246105	0.00499889	-1.07005	0.00307674	0.0010553	0.000333333	0.780922	143	207.792	209.701	-0.0169147	0.0045987	-5	0.00330788	2.22883e-05
rCS	3L	11599845	CG6091	FBgn0036180	CG6091:5	synonymous	ped	25	0.153374	15	T	C	T	1.55714e-06	0.207246	143	189.868	196.801	-0.0246107	0.00490578	-1.07005	0.00307674	0.0010553	4.80581e-05	0.604567	143	207.792	211.636	-0.0185187	0.00441477	-5	0.00330788	2.22883e-05
rCS	3L	11613815	CG6084		CG6084-in	intronic	FBgn0036182,FBgn0017641,34F4T,ESTS:34F4T,Aldehyde reductase	41	0.25625	8	A	T	A	4.90851e-06	0.323784	143	189.868	195.677	-0.0244954	0.00515475	-1.07005	0.00307674	0.0010553	0.000770998	0.843138	143	207.792	208.761	-0.016338	0.00475234	-5	0.00330788	2.22883e-05
rCS	3L	14813948	CG17839	FBgn0036454	CG17839-in	intronic	CT39634	64	0.392638	16	A	G	G	1.89114e-05	0.336795	143	189.868	194.732	0.0224805	0.00507664	-1.07005	0.00307674	0.0010553	4.52068e-06	0.515091	143	207.792	213.924	0.0212903	0.00446216	-5	0.00330788	2.22883e-05
rCS	3L	16162174	CG33796		-381	intergenic		11	0.0691824	9	C	T	C	7.46643e-06	0.323784	143	189.868	195.359	-0.0239034	0.00513729	-1.07005	0.00307674	0.0010553	5.05638e-05	0.604567	143	207.792	211.513	-0.0195762	0.00468136	-5	0.00330788	2.22883e-05
rCS	3L	16162174	CG32152		25289	intergenic		11	0.0691824	9	C	T	C	7.46643e-06	0.323784	143	189.868	195.359	-0.0239034	0.00513729	-1.07005	0.00307674	0.0010553	5.05638e-05	0.604567	143	207.792	211.513	-0.0195762	0.00468136	-5	0.00330788	2.22883e-05
rCS	3L	16202321	CG13073		-3830	intergenic		37	0.226994	11	T	G	G	5.3431e-05	0.442919	143	189.868	193.773	0.0217691	0.00522338	-1.07005	0.00307674	0.0010553	3.76339e-06	0.515091	143	207.792	214.134	0.0221781	0.00460693	-5	0.00330788	2.22883e-05
rCS	3L	16202321	CG33690		7189	intergenic		37	0.226994	11	T	G	G	5.3431e-05	0.442919	143	189.868	193.773	0.0217691	0.00522338	-1.07005	0.00307674	0.0010553	3.76339e-06	0.515091	143	207.792	214.134	0.0221781	0.00460693	-5	0.00330788	2.22883e-05
rCS	3L	16202334	CG13073		-3817	intergenic		37	0.23125	11	T	A	A	4.57012e-05	0.418908	143	189.868	193.922	0.0218908	0.00520277	-1.07005	0.00307674	0.0010553	2.85021e-06	0.515091	143	207.792	214.397	0.0223444	0.00458021	-5	0.00330788	2.22883e-05
rCS	3L	16202334	CG33690		7202	intergenic		37	0.23125	11	T	A	A	4.57012e-05	0.418908	143	189.868	193.922	0.0218908	0.00520277	-1.07005	0.00307674	0.0010553	2.85021e-06	0.515091	143	207.792	214.397	0.0223444	0.00458021	-5	0.00330788	2.22883e-05
rCS	3L	16824644	TSG101	FBgn0036666	-10755	intergenic	FBgn0082594,erupted,ept,DmTSG101,Tsg101,CG9712,Erupted,dVps23,dTsg101,dTSg101,tsg101,CG9172,vps23,Tumor Susceptibility Gene-101	51	0.312883	13	G	A	A	8.35551e-05	0.481492	143	189.868	193.346	-0.021424	0.00528734	-1.07005	0.00307674	0.0010553	2.17165e-06	0.515091	143	207.792	214.64	-0.0226533	0.00458482	-5	0.00330788	2.22883e-05
rCS	3L	16824644	CG13024	FBgn0036665	20677	intergenic	FBgn0062921,BcDNA:RH61817	51	0.312883	13	G	A	A	8.35551e-05	0.481492	143	189.868	193.346	-0.021424	0.00528734	-1.07005	0.00307674	0.0010553	2.17165e-06	0.515091	143	207.792	214.64	-0.0226533	0.00458482	-5	0.00330788	2.22883e-05
rCS	3L	17025377	beg	FBgn0036691	-3397	intergenic	beg,bad egg,CG7842	14	0.0838323	14	G	A	G	3.25377e-06	0.30677	143	189.868	195.339	-0.0244306	0.00503945	-1.07005	0.00307674	0.0010553	0.000194151	0.734379	143	207.792	210.327	-0.0183171	0.00478599	-5	0.00330788	2.22883e-05
rCS	3L	17025377	Ilp8	FBgn0036690	197	intergenic		14	0.0838323	14	G	A	G	3.25377e-06	0.30677	143	189.868	195.339	-0.0244306	0.00503945	-1.07005	0.00307674	0.0010553	0.000194151	0.734379	143	207.792	210.327	-0.0183171	0.00478599	-5	0.00330788	2.22883e-05
rCS	3L	17665322	CG34251	FBgn0085280	CG34251-in	intronic		18	0.113208	6	C	T	T	4.08883e-07	0.1799	143	189.868	196.735	-0.0267563	0.00503483	-1.07005	0.00307674	0.0010553	0.000187397	0.734379	143	207.792	209.924	-0.0185312	0.0048298	-5	0.00330788	2.22883e-05
rCS	3R	3766420	dsx		dsx-in	intronic	doublesex,Dmdsx,Dsx,intersex-62c,Hermaphrodite,ix-62c,Hr,CG11094,Doublesex,DSX	14	0.0875	15	A	T	A	2.61885e-07	0.1799	143	189.868	197.093	-0.0266324	0.00492178	-1.07005	0.00307674	0.0010553	6.52908e-05	0.606574	143	207.792	211.103	-0.0193103	0.00469147	-5	0.00330788	2.22883e-05
rCS	3R	5963561	tws		tws-in	intronic	FBgn0004906,FBgn0010249,FBgn0010748,FBgn0010780,FBgn0011012,FBgn0011434,FBgn0028118,FBgn0037791,FBgn0060325,FBgn0060355,FBgn0060382,FBgn0060393,FBgn0060451,FBgn0060476,FBgn0060482,FBgn0060490,FBgn0060503,FBgn0060530,FBgn0060599,FBgn0060620,FBgn0060667,FBgn0060680,FBgn0060683,FBgn0060685,FBgn0060686,FBgn0060717,FBgn0060727,FBgn0060736,FBgn0060738,FBgn0060744,FBgn0060764,FBgn0060771,FBgn0060777,FBg…	32	0.201258	8	C	T	T	1.18629e-06	0.195728	143	189.868	197.055	-0.0260918	0.00513811	-1.07005	0.00307674	0.0010553	1.47051e-05	0.544673	143	207.792	212.808	-0.021053	0.00468908	-5	0.00330788	2.22883e-05
rCS	3R	12947643	CG17477	FBgn0038479	-4167	intergenic	SPH174,chymotrypsin-type peptidase	19	0.116564	13	C	A	C	6.28015e-05	0.450511	143	189.868	193.652	-0.0223508	0.00541697	-1.07005	0.00307674	0.0010553	5.07311e-06	0.515091	143	207.792	213.849	-0.022632	0.00477038	-5	0.00330788	2.22883e-05
rCS	3R	12947643	CG42779		143	intergenic	FBgn0016063,FBgn0023208,CG3937,filamin,Filamin,Cheerio,filamin-240,Filamin-A,Filamin-1,filamin B,FLN,shi kong,sko,Cher	19	0.116564	13	C	A	C	6.28015e-05	0.450511	143	189.868	193.652	-0.0223508	0.00541697	-1.07005	0.00307674	0.0010553	5.07311e-06	0.515091	143	207.792	213.849	-0.022632	0.00477038	-5	0.00330788	2.22883e-05
rCS	3R	12947643	cher	FBgn0014141	cher-in	intergenic	FBgn0016063,FBgn0023208,CG3937,filamin,Filamin,Cheerio,filamin-240,Filamin-A,Filamin-1,filamin B,FLN,shi kong,sko,Cher	19	0.116564	13	C	A	C	6.28015e-05	0.450511	143	189.868	193.652	-0.0223508	0.00541697	-1.07005	0.00307674	0.0010553	5.07311e-06	0.515091	143	207.792	213.849	-0.022632	0.00477038	-5	0.00330788	2.22883e-05
rCS	3R	12956822	CG4053		-196	intergenic	SP185	15	0.0955414	11	C	A	C	1.57855e-05	0.325559	143	189.868	194.98	-0.0243997	0.00545549	-1.07005	0.00307674	0.0010553	3.64349e-06	0.515091	143	207.792	214.164	-0.0233344	0.00483954	-5	0.00330788	2.22883e-05
rCS	3R	12956822	CG17475	FBgn0038481	681	intergenic	SP131	15	0.0955414	11	C	A	C	1.57855e-05	0.325559	143	189.868	194.98	-0.0243997	0.00545549	-1.07005	0.00307674	0.0010553	3.64349e-06	0.515091	143	207.792	214.164	-0.0233344	0.00483954	-5	0.00330788	2.22883e-05
rCS	3R	12958523	CG31266	FBgn0051266	CG31266:1	synonymous	FBgn0038483,SPH146,CG5240	17	0.106918	15	G	A	G	0.000367446	0.654102	143	189.868	191.85	-0.0197174	0.00540081	-1.07005	0.00307674	0.0010553	4.28983e-06	0.515091	143	207.792	213.753	-0.0222433	0.00464995	-5	0.00330788	2.22883e-05
rCS	3R	20396321	CG13624	FBgn0039209	CG13624-in	intronic	FBgn0045886,anon-WO0153538.65	21	0.127273	16	T	A	T	9.88379e-07	0.195728	143	189.868	197.575	-0.0258421	0.00504825	-1.07005	0.00307674	0.0010553	0.000849958	0.845326	143	207.792	208.948	-0.0160651	0.00471234	-5	0.00330788	2.22883e-05
rCS	3R	25405635	CG7567	FBgn0039670	-7324	intergenic	FBgn0063003,BcDNA:RE47447	26	0.156627	14	C	G	C	5.47217e-06	0.323784	143	189.868	195.761	-0.0241481	0.00510912	-1.07005	0.00307674	0.0010553	0.000220899	0.747981	143	207.792	209.766	-0.0176853	0.00466382	-5	0.00330788	2.22883e-05
rCS	3R	25405635	Dr		14628	intergenic	FBgn0002849,FBgn0015510,FBgn0020528,Msh,msh,153515_at,CG1897,muscle specific homeobox,muscle segment homeobox,msh1,Muscle specific homeobox,msh-1,Dr-distal,99B,muscle-specific homeodomain 1,lottchen,ltt,l(3)FA30,Muscle segment homeobox,Msx,muscle-specific homeodomain,Drop	26	0.156627	14	C	G	C	5.47217e-06	0.323784	143	189.868	195.761	-0.0241481	0.00510912	-1.07005	0.00307674	0.0010553	0.000220899	0.747981	143	207.792	209.766	-0.0176853	0.00466382	-5	0.00330788	2.22883e-05
rCS	X	5810038	CG3011	FBgn0029823	CG3011-in	intronic	FBgn0066862,144561_at,anon-WO03040301.100	46	0.275449	16	T	C	T	8.78769e-07	0.195728	143	189.868	197.41	-0.0248219	0.00482419	-1.07005	0.00307674	0.0010553	5.79028e-06	0.537992	143	207.792	213.645	-0.0202192	0.00428996	-5	0.00330788	2.22883e-05
rCS	X	9621573	Sp1	FBgn0020378	-2135	intergenic	SP1,D-Sp1,D.Sp1,CG1343,dSp1,sp1,D-Sp8	16	0.0963855	14	A	C	A	1.57012e-06	0.207246	143	189.868	196.634	-0.0253446	0.00505397	-1.07005	0.00307674	0.0010553	0.00010933	0.670233	143	207.792	210.897	-0.0190316	0.0047803	-5	0.00330788	2.22883e-05
rCS	X	9621573	btd		29967	intergenic	BTD,CG12653,Btd,button-head	16	0.0963855	14	A	C	A	1.57012e-06	0.207246	143	189.868	196.634	-0.0253446	0.00505397	-1.07005	0.00307674	0.0010553	0.00010933	0.670233	143	207.792	210.897	-0.0190316	0.0047803	-5	0.00330788	2.22883e-05
rCS	X	9621621	Sp1	FBgn0020378	-2087	intergenic	SP1,D-Sp1,D.Sp1,CG1343,dSp1,sp1,D-Sp8	15	0.0903614	10	G	A	G	1.14938e-06	0.195728	143	189.868	196.002	-0.0251361	0.00494299	-1.07005	0.00307674	0.0010553	0.000437817	0.801956	143	207.792	209.154	-0.0164126	0.00455741	-5	0.00330788	2.22883e-05
rCS	X	9621621	btd		30015	intergenic	BTD,CG12653,Btd,button-head	15	0.0903614	10	G	A	G	1.14938e-06	0.195728	143	189.868	196.002	-0.0251361	0.00494299	-1.07005	0.00307674	0.0010553	0.000437817	0.801956	143	207.792	209.154	-0.0164126	0.00455741	-5	0.00330788	2.22883e-05
rCS	X	10868903	CG42339	FBgn0259241	CG42339-in	intronic	CG15204,CG12626,FBgn0040851,FBgn0030256,CG12626,CG15204	19	0.113772	15	A	G	A	8.79384e-06	0.323784	143	189.868	195.437	-0.0228026	0.00494216	-1.07005	0.00307674	0.0010553	0.000630808	0.824269	143	207.792	209.207	-0.0157049	0.00449165	-5	0.00330788	2.22883e-05
