# Supplementary material for: Genome-Wide Analysis Reveals Novel Regulators of Growth in Drosophila melanogaster
Source: PLoS Genet. 2016 Jan 11;12(1):e1005616. doi: 10.1371/journal.pgen.1005616 (PMC4709145; doi:10.1371/journal.pgen.1005616)
Supplement: S5 Table — Enrichment: Enrichment p-values for SNPs localizing to different genomic regions. LincRNA: LincRNA loci that overlap significant SNPs and their expression during different developmental stages. LincRNA data from Young et al. [67]. (XLS) [file pgen.1005616.s016.xls]

## Sheet: enrichment
Trait	Track	Enrichment
Gene region
CSF	mRNA	5.02004e-45		ND= no SNP in this track among candidates
CSM	mRNA	1.95182e-19
CSFIC	mRNA	6.13432e-41
CSMIC	mRNA	4.34777e-29
rCSF	mRNA	2.40676e-43
rCSM	mRNA	8.44071e-20
IODF	mRNA	8.56346e-17
IODM	mRNA	1.47606e-10
IODFIC	mRNA	9.69979e-37
IODMIC	mRNA	8.1816e-09
CSF	gene	2.17379e-46
CSM	gene	4.85343e-20
CSFIC	gene	3.75993e-42
CSMIC	gene	4.81376e-30
rCSF	gene	1.31113e-44
rCSM	gene	2.09678e-20
IODF	gene	2.15072e-17
IODM	gene	6.58314e-11
IODFIC	gene	5.37834e-38
IODMIC	gene	3.68693e-09
CSF	CDS	6.29382e-05
CSM	CDS	0.0157037
CSFIC	CDS	1.81198e-06
CSMIC	CDS	0.0130663
rCSF	CDS	0.0554082
rCSM	CDS	0.0915084
IODF	CDS	0.0440039
IODM	CDS	0.00866062
IODFIC	CDS	0.00186576
IODMIC	CDS	0.159746
CSF	intron	3.07514e-19
CSM	intron	1.37476e-11
CSFIC	intron	1.19725e-17
CSMIC	intron	3.79716e-17
rCSF	intron	3.93499e-26
rCSM	intron	7.35738e-12
IODF	intron	2.66514e-08
IODM	intron	0.000559617
IODFIC	intron	2.45364e-18
IODMIC	intron	0.000440401
CSF	5'UTR	ND
CSM	5'UTR	ND
CSFIC	5'UTR	ND
CSMIC	5'UTR	ND
rCSF	5'UTR	ND
rCSM	5'UTR	ND
IODF	5'UTR	ND
IODM	5'UTR	ND
IODFIC	5'UTR	ND
IODMIC	5'UTR	ND
CSF	3'UTR	7.23104e-06
CSM	3'UTR	ND
CSFIC	3'UTR	0.203965
CSMIC	3'UTR	ND
rCSF	3'UTR	0.0217674
rCSM	3'UTR	ND
IODF	3'UTR	ND
IODM	3'UTR	ND
IODFIC	3'UTR	ND
IODMIC	3'UTR	ND
Enhancer signatures
CSF	H3K4Me1_L2	0.00260252
CSFIC	H3K4Me1_L2	8.54879e-05
CSMIC	H3K4Me1_L2	0.000107409
IODFIC	H3K4Me1_L2	0.000420066
rCSF	H3K4Me1_Pupae	0.00969734
CSF	H3K27Ac_L2	4.29451e-18
CSM	H3K27Ac_L2	1.70229e-05
CSFIC	H3K27Ac_L2	1.36821e-06
CSMIC	H3K27Ac_L2	8.8994e-05
rCSF	H3K27Ac_L2	1.36821e-06
rCSM	H3K27Ac_L2	1.4617e-05
IODFIC	H3K27Ac_L2	0.000252783
CSF	H3K27Ac_L3	8.07785e-08
CSFIC	H3K27Ac_L3	0.000105713
rCSF	H3K27Ac_L3	2.17263e-06
IODFIC	H3K27Ac_L3	2.81449e-07
IODMIC	H3K27Ac_L3	0.00255223
CSF	H3K27Ac_Pupae	0.00290663
IODFIC	H3K27Ac_Pupae	0.000150319
IODMIC	H3K27Ac_Pupae	0.00143096
lincRNAs
IODF	lincRNAs	0.00720106

## Sheet: lincRNA
Gene ID	Chromosome	Position	Candidate SNP	Phenotype	Strand	Transcript ID	Exon Number	Embyros 0 2 hour after egg laying	Embyros 2 4 hours after egg laying	Embyros 4 6 hours after egg laying	Embyros 6 8 hours after egg laying	Embyros 8 10 hours after egg laying	Embyros 10 12 hours after egg laying	Embyros 12 14 hours after egg laying	Embyros 14 16 hours after egg laying	Embyros 16 18 hours after egg laying	Embyros 18 20 hours after egg laying	Embyros 20 22 hours after egg laying	Embyros 22 24 hours after egg laying	L1 stage larvae	L2 stage larvae	L3 stage larvae 12 hr post molt	L3 stage larvae dark blue gut puff stage 1 2	L3 stage larvae light blue gut puff stage 3 6	L3 stage larvae clear gut puff stage 7 9	White prepupae	Pupae 12 hours after white prepupae	Pupae 24 hours after white prepupae	Pupae 2 days after white prepupae	Pupae 3 days after white prepupae	Pupae 4 days after white prepupae	Adult male one day after eclosion	Adult male 5 days after eclosion	Adult male 30 days after eclosion	Adult female one day after eclosion	Adult female 5 days after eclosion	Adult female 30 days after eclosion	Validated by qPCR	Tissue with maximal expression
lincRNA.195	2L	2L:19210174-19212277	19212243	IODF	+	TCONS_00009583	1	0	0	0	0.196685	0	0	0	0	0	0	0	0	0	0	0	0	0	0	0	0	0	0	0	0	0	0	0	0	0	0	ND	NA
lincRNA.587	3L	3L:17025316-17026795	17025377	rCSF	+	TCONS_00140401	1	0	0	0	0	0	0	0	0	0	0	0	0	0	0	0	0	0	0	0	0	0	0	0	0	0	0	0	0	0	6.55753	ND	NA
lincRNA.815	3R	3R:15544913-15545832	15544913	IODF/IODFIC	-	TCONS_00232633	1	0	0	0	0	0	0	0	0	0	0	0	0	0	0	0	0	0	0	0	0	0	0	1.207	0	0	0	0	0	0	0	ND	NA
