# Supplementary material for: Genome-Wide Analysis Reveals Novel Regulators of Growth in Drosophila melanogaster
Source: PLoS Genet. 2016 Jan 11;12(1):e1005616. doi: 10.1371/journal.pgen.1005616 (PMC4709145; doi:10.1371/journal.pgen.1005616)
Supplement: S7 Table — The lines are ordered according to decreasing significance of the change in median wing area upon knockdown (Wilcoxon rank sum test). Crosses in columns pigmentation, bristles, veins indicate a slightly abnormal corresponding phenotype. N = number of individuals tested, Median = median wing area, Q25 and Q75 = first and third quartile of wing area distribution. MAF 3 or MAF 5 in brackets means a SNP in or near this gene was found among the top associated genes in a GWAS for wing size with a lower MAF cut-off (SNPs present in min. 3% or 5% of lines). This gene was tested for wing size since a SNP in it showed association to body size with the used MAF cutoff and thus a corresponding RNAi line was available. Overview: Overview validation results. Number of SNPs that were tested and the number and percentage that were validated for each trait. We tested the known genes chinmo, aPKC, tws and Ilp8 as positive controls, but did not include them in the calculation of these percentages. Fisher’s exact test: We performed a two-sided Fisher’s exact test to determine if the proportions of validated genes was different between candidates and random genes. The results are shown for different Wilcoxon test p-value validation thresholds. Only not previously known candidates and random lines were used (Ncandidates = 43, Nrandom = 22) (XLS) [file pgen.1005616.s018.xls]

## Sheet: Validation candidates females
Gene Symbol	Gene Name	CG Number	Line	Candidate FaST-LMM	Candidate VEGAS	Pigmentation	Bristles	Veins	N	Statistic	Pvalue	Median	Q25	Q75	Fold Change	% Change
Rbp2	RNA-binding protein 2	CG4429	34301		CSF/CSM/CSFIC/CSMIC/rCSF/rCSM				25	625	1.58215e-14	1.27541	1.23675	1.30628	0.874136	-12.5864
Magi	Magi	CG30388	41735	IODFIC	IOD (rCSF MAF3)				25	0	1.58215e-14	1.60646	1.58642	1.61704	1.10103	10.1029
Muc68Ca	Mucin 68Ca	CG18331	48501		rCSF				25	625	1.58215e-14	1.25416	1.20002	1.27916	0.859572	-14.0428
Rbp2	RNA-binding protein 2	CG4429	100817		CSF/CSM/CSFIC/CSMIC/rCSF/rCSM	x			23	575	6.46043e-14	1.29017	1.26463	1.30693	0.884251	-11.5749
ana	anachronism	CG8084	48344	CSM/CSMIC		x	x		21	525	2.88038e-13	1.1756	1.13322	1.23211	0.805728	-19.4272
CG6084		CG6084	27552	CSF/CSFIC/rCSF					25	619	4.74644e-13	1.36515	1.33789	1.38734	0.935642	-6.43576
CG17839		CG17839	100149	CSF/CSM/CSFIC/CSMIC/rCSF/rCSM					25	7	7.11966e-13	1.53061	1.51015	1.55714	1.04904	4.90449
Magi	Magi	CG30388	33411		IOD (rCSF MAF3)				25	10	2.19918e-12	1.5548	1.52949	1.56594	1.06562	6.56221
CG7341		CG7341	109019	CSF/CSM/CSFIC/CSMIC		x		x	22	538	3.66728e-11	1.29494	1.24711	1.32883	0.887523	-11.2477
Ance-3	Ance-3	CG17988	21731	rCSF/rCSM					23	17	7.83004e-11	1.52528	1.49298	1.53884	1.04539	4.53898
tws	twins	CG6235	104167	CSF/CSFIC/rCSF/rCSM		x	x	x	17	420	1.49217e-10	1.28628	1.24985	1.33033	0.881587	-11.8413
CkII-αi3	CkII-α subunit interactor 3	CG3217	102313		CSM/CSMIC				25	597	2.91843e-10	1.3803	1.34689	1.39729	0.946028	-5.39721
chinmo	Chronologically inappropriate morphogenesis	CG31666	26777 (BL)	rCSF/rCSM					25	33	8.49976e-10	1.51631	1.49391	1.54336	1.03925	3.92461
Cep89	Centrosomal protein 89kDa homolog	CG8214	24240	CSF/CSM/CSFIC/CSMIC/rCSF/rCSM	CSF/CSM/CSFIC/CSMIC/rCSM				22	24	9.88951e-10	1.54049	1.51644	1.57091	1.05582	5.5815
CG5337		CG5337	110061	CSF					25	37	1.8912e-09	1.53604	1.51018	1.54521	1.05277	5.27692
CG8861		CG8861	102732	CSF/CSFIC					25	43	5.80904e-09	1.51529	1.48751	1.56105	1.03855	3.85477
Tsf3	Transferrin 3	CG3666	108440	CSF/CSM/CSFIC/CSMIC	CSF				25	43	5.80904e-09	1.53076	1.4856	1.54701	1.04915	4.91456
Or45a	Odorant receptor 45a	CG1978	100201	CSFIC/CSMIC/rCSF	CSMIC				24	40	6.67925e-09	1.52508	1.5044	1.55137	1.04526	4.52558
CG5337		CG5337	22069	CSF					25	47	1.17391e-08	1.50632	1.4828	1.52033	1.0324	3.23957
Exn	Ephexin	CG42665	105885	CSF					25	55	4.37658e-08	1.5166	1.48999	1.52625	1.03944	3.94428
sick	sickie	CG43720	104551		IOD (CSF/CSM/CSFIC/CSMIC MAF3/5)				24	62	2.5026e-07	1.50359	1.48428	1.52368	1.03053	3.0527
Ance-3	Ance-3	CG17988	101665	rCSF/rCSM					24	64	3.34422e-07	1.55222	1.51639	1.57445	1.06385	6.38545
Ilp8	Insulin-like peptide 8	CG14059	9420	rCSF	rCSF				24	72	1.01148e-06	1.51686	1.48749	1.53539	1.03962	3.96244
CG5381		CG5381	29958		IOD (CSF/CSFIC MAF3)				24	523	1.94187e-06	1.41043	1.38777	1.43511	0.966676	-3.33244
CG16884		CG16884	108690	rCSF/rCSM		x			24	521	2.50099e-06	1.40934	1.39037	1.43731	0.965932	-3.4068
CG34351		CG34351	109021	CSM/CSMIC/rCSM					25	92	6.11825e-06	1.49745	1.47704	1.52049	1.02632	2.63157
CG9568		CG9568	11750	rCSF/rCSM					25	105	2.4983e-05	1.49536	1.4707	1.51517	1.02489	2.48881
CG15706		CG15706	4907	CSF/CSM/CSFIC/CSMIC					24	105	4.71323e-05	1.5289	1.46848	1.57343	1.04787	4.78702
CG30090		CG30090	107550	CSF/CSFIC/CSMIC/rCSF	CSM/CSMIC				22	95	6.19784e-05	1.51375	1.47178	1.53872	1.03749	3.74888
Fbp2	Fat body protein 2	CG3763	33173	CSF/rCSM				x	24	110	7.76061e-05	1.48708	1.47417	1.50052	1.01921	1.92073
Sr-CIV	Scavenger receptor class C, type IV	CG3212	100487		rCSF/rCSM				25	117	8.14615e-05	1.48354	1.46725	1.50591	1.01678	1.67815
Trpm	Transient receptor potential cation channel, subfamily M ortholog	CG44240	110226	CSF/CSM/CSFIC/CSMIC					25	117	8.14615e-05	1.50676	1.46688	1.54157	1.0327	3.2698
CG13624		CG13624	32251	CSF/CSFIC/rCSF					21	431	0.000110446	1.41807	1.39678	1.44259	0.97191	-2.80902
CG3011		CG3011	19206	CSF/CSM/CSFIC/CSMIC/rCSF/rCSM					25	126	0.000185072	1.49994	1.4718	1.52287	1.02803	2.80271
CG33160		CG33160	107557		CSF/CSFIC/rCSF				23	116	0.000258328	1.49907	1.46753	1.51942	1.02743	2.74267
Mid1	Mid 1 ortholog (S. cerevisiae)	CG33988	107431	rCSF/rCSM					25	132	0.000310707	1.50849	1.47897	1.56079	1.03389	3.38878
sick	sickie	CG43720	17767		IOD (CSF/CSM/CSFIC/CSMIC MAF3/5)				20	104	0.000601568	1.4954	1.47323	1.52608	1.02491	2.49131
dsx	doublesex	CG11094	26716	rCSF					24	133	0.000612282	1.4985	1.48058	1.51373	1.02704	2.70409
aPKC	atypical protein kinase C	CG42783	2907	CSF/CSFIC				x	14	284	0.000985281	1.42317	1.39358	1.43142	0.975407	-2.4593
dsx	doublesex	CG11094	55646	rCSF					25	474	0.00139338	1.4219	1.40513	1.44312	0.97454	-2.54604
Gs2	Glutamine synthetase 2	CG1743	32929	CSM/CSMIC	CSF/CSM/CSFIC/CSMIC/rCSF/rCSM				24	150	0.00227734	1.48405	1.46359	1.49237	1.01713	1.71327
Fili	Fish-lips	CG34368	106655	CSF/CSFIC/rCSF					25	465	0.00264845	1.43716	1.41889	1.44348	0.984994	-1.50056
DCX-EMAP	Doublecortin-domain-containing echinoderm-microtubule-associated protein ortholog	CG42247	108417		CSM/CSMIC/rCSF/rCSM				25	168	0.00452953	1.468	1.46014	1.50704	1.00613	0.613344
CG13896		CG13896	102063	CSMIC	CSM/CSFIC/CSMIC/rCSM				25	193	0.0200025	1.47777	1.45756	1.48824	1.01283	1.28303
CG6084		CG6084	27551	CSF/CSFIC/rCSF					22	382	0.0221652	1.44006	1.41185	1.46477	0.986981	-1.30187
Lar	Leukocyte-antigen-related-like	CG10443	36270	CSF/CSM/CSFIC/CSMIC/rCSF/rCSM				x	25	421	0.0353083	1.4448	1.42214	1.45308	0.990233	-0.976731
CG15706		CG15706	108892	CSF/CSM/CSFIC/CSMIC					25	204	0.0353083	1.47414	1.45757	1.49333	1.01034	1.03423
CG34370		CG34370	39158	CSF/CSM/CSMIC/rCSM					24	196	0.0376486	1.47932	1.4509	1.50176	1.01389	1.3895
ana	anachronism	CG8084	48343	CSM/CSMIC					24	396	0.05562	1.42671	1.38664	1.46609	0.977838	-2.21624
CG8861		CG8861	5832	CSF/CSFIC					25	221	0.0773431	1.47048	1.4537	1.53946	1.00783	0.783317
CG6091		CG6091	27559	CSF/CSFIC/rCSF					25	404	0.0773431	1.45094	1.43557	1.45639	0.994438	-0.556183
Khc-73	Kinesin heavy chain 73	CG8183	105984	CSF/rCSF		x			23	373	0.0793204	1.43894	1.42456	1.46292	0.986218	-1.37822
Mco1	Multicopper oxidase-1	CG3759	15602	CSF/rCSM					24	383	0.0992415	1.44256	1.41429	1.46118	0.988699	-1.13008
CG13624		CG13624	109612	CSF/CSFIC/rCSF					23	209	0.107925	1.47254	1.44339	1.49848	1.00924	0.924299
CG1942		CG1942	107788	CSM/CSMIC					25	238.5	0.153827	1.48202	1.41875	1.50476	1.01574	1.57431
Trpm	Transient receptor potential cation channel, subfamily M ortholog	CG44240	30610	CSF/CSM/CSFIC/CSMIC					25	240	0.163779	1.4676	1.4397	1.52886	1.00586	0.586066
CG3011		CG3011	19208	CSF/CSM/CSFIC/CSMIC/rCSF/rCSM					25	384	0.169782	1.45183	1.39744	1.46844	0.99505	-0.494979
CG32269		CG32269	49714	CSF/CSFIC					25	260	0.315946	1.47235	1.45089	1.48172	1.00912	0.911689
Exn	Ephexin	CG42665	41962	CSF				x	25	361	0.354829	1.45259	1.4339	1.47279	0.995568	-0.443165
CheB38b	Chemosensory protein B 38b	CG33321	104635	rCSM	rCSM				25	342	0.57678	1.45223	1.43386	1.47291	0.995324	-0.467564
Fili	Fish-lips	CG34368	44532	CSF/CSFIC/rCSF					25	289	0.658147	1.46077	1.45183	1.47241	1.00118	0.117953
tws	twins	CG6235	34340	CSF/CSFIC/rCSF/rCSM		x			20	258	0.865349	1.45374	1.42281	1.48407	0.996359	-0.364141
CG34251		CG34251	109218	rCSF					23	291	0.9511	1.45445	1.43279	1.49613	0.996847	-0.315342
CG1315		CG1315	CG1315						25	312.5	1	1.45905	1.444	1.47611	1	0

## Sheet: Validation candidates males
Gene Symbol	Gene Name	CG Number	Line	Candidate FaST-LMM	Candidate VEGAS	Pigmentation	Bristles	Veins	N	Statistic	Pvalue	Median	Q25	Q75	Fold Change	% Change
Rbp2	RNA-binding protein 2	CG4429	100817		CSF/CSM/CSFIC/CSMIC/rCSF/rCSM	x			25	600	3.16429e-14	1.00065	0.983986	1.01094	0.883626	-11.6374
Rbp2	RNA-binding protein 2	CG4429	34301		CSF/CSM/CSFIC/CSMIC/rCSF/rCSM				25	600	3.16429e-14	1.0155	0.968093	1.03073	0.896742	-10.3258
Muc68Ca	Mucin 68Ca	CG18331	48501		rCSF				23	552	1.2404e-13	0.962646	0.921972	0.990321	0.85007	-14.993
CG7341		CG7341	109019	CSF/CSM/CSFIC/CSMIC		x		x	24	562	3.15062e-11	1.05535	1.00866	1.08707	0.931933	-6.80673
Magi	Magi	CG30388	33411		IOD (rCSF MAF3)				25	17	3.83512e-11	1.20789	1.19236	1.22434	1.06664	6.66381
tws	twins	CG6235	104167	CSF/CSFIC/rCSF/rCSM		x	x		17	404	1.58328e-10	0.988395	0.972317	1.02423	0.872808	-12.7192
CG16884		CG16884	108690	rCSF/rCSM				x	24	555	2.17443e-10	1.07469	1.06381	1.09093	0.949011	-5.0989
Magi		CG30388	41735		IOD (rCSF MAF3)				23	32	5.39736e-09	1.2514	1.24151	1.26504	1.10506	10.5058
CkII-αi3	CkII-α subunit interactor 3	CG3217	102313		CSM/CSMIC				24	540	6.07158e-09	1.07962	1.05501	1.09481	0.953366	-4.66337
chinmo	Chronologically inappropriate morphogenesis	CG31666	26777 (BL)	rCSF/rCSM					25	50	3.8683e-08	1.18792	1.17555	1.21428	1.049	4.90025
Khc-73	Kinesin heavy chain 73	CG8183	105984	CSF/rCSF		x			22	486	7.60971e-08	1.09664	1.07724	1.10763	0.968391	-3.1609
tws	twins	CG6235	34340	CSF/CSFIC/rCSF/rCSM		x			24	519	2.28978e-07	1.08972	1.06373	1.11369	0.962288	-3.77122
Ance-3	Ance-3	CG17988	21731	rCSF/rCSM					25	67	5.11352e-07	1.17781	1.1668	1.19183	1.04008	4.00757
CG5381		CG5381	29958		IOD (CSF/CSFIC MAF3)				23	491	8.20002e-07	1.08922	1.07431	1.10802	0.961845	-3.81551
dsx	doublesex	CG11094	55646	rCSF					23	78	8.11548e-06	1.17835	1.159	1.19365	1.04055	4.05473
CG6091		CG6091	27559	CSF/CSFIC/rCSF					25	508	1.17252e-05	1.09402	1.07317	1.11894	0.966078	-3.39217
CG13624		CG13624	32251	CSF/CSFIC/rCSF					14	302	1.19426e-05	1.08999	1.06142	1.10818	0.962519	-3.74809
ana	anachronism	CG8084	48343	CSM/CSMIC					9	202	2.49954e-05	1.0576	1.0306	1.06925	0.933922	-6.60782
Tsf3	Transferrin 3	CG3666	108440	CSF/CSM/CSFIC/CSMIC	CSF				24	100	5.21595e-05	1.16461	1.15991	1.17213	1.02842	2.84203
dsx	doublesex	CG11094	26716	rCSF					24	101	5.78771e-05	1.19045	1.14722	1.22902	1.05123	5.12349
CG5337		CG5337	22069	CSF					24	105	8.70215e-05	1.17411	1.15621	1.20001	1.0368	3.68027
Or45a	Odorant receptor 45a	CG1978	100201	CSFIC/CSMIC/rCSF	CSMIC				25	120	0.000199094	1.16439	1.15008	1.19532	1.02822	2.82172
sick	sickie	CG43720	104551		IOD (CSF/CSM/CSFIC/CSMIC MAF3/5)				25	123	0.000260558	1.16799	1.15022	1.18824	1.0314	3.14041
Fili	Fish-lips	CG34368	44532	CSF/CSFIC/rCSF					17	335	0.000320137	1.11313	1.10219	1.12264	0.982954	-1.70456
Ilp8	Insulin-like peptide 8	CG14059	9420	rCSF	rCSF				25	136	0.000781564	1.17029	1.15485	1.19718	1.03343	3.34272
eIF3-S8	eIF3-S8	CG4954	26667	rCSF					25	459	0.00116	1.10486	1.09138	1.12992	0.975652	-2.43476
Exn	Ephexin	CG42665	105885	CSF					25	142	0.00125313	1.16122	1.14883	1.17429	1.02543	2.54267
sick	sickie	CG43720	17767		IOD (CSF/CSM/CSFIC/CSMIC MAF3/5)				14	71	0.00267142	1.17009	1.15736	1.19078	1.03326	3.3259
Fili	Fish-lips	CG34368	106655	CSF/CSFIC/rCSF					25	434	0.00678494	1.11703	1.10638	1.12838	0.986397	-1.36035
chinmo	Chronologically inappropriate morphogenesis	CG7629	33638 (BL)	rCSF/rCSM					18	315	0.0111858	1.0931	1.07775	1.14491	0.965273	-3.47271
CG9568		CG9568	11750	rCSF/rCSM					21	143	0.0125412	1.15775	1.14678	1.1827	1.02236	2.23599
CG30090		CG30090	107550	CSF/CSFIC/CSMIC/rCSF	CSM/CSMIC				23	160	0.0129898	1.15989	1.14088	1.18706	1.02425	2.42487
Sr-CIV	Scavenger receptor class C, type IV	CG3212	100487		rCSF/rCSM				24	173	0.0172423	1.16029	1.14225	1.17209	1.0246	2.46011
CG6084		CG6084	27552	CSF/CSFIC/rCSF					25	412	0.0248037	1.11768	1.09194	1.13881	0.986977	-1.30233
Lar	Leukocyte-antigen-related-like	CG10443	36270	CSF/CSM/CSFIC/CSMIC/rCSF/rCSM					24	180	0.0256922	1.15741	1.1404	1.18434	1.02205	2.20534
CG17839		CG17839	100149	CSF/CSM/CSFIC/CSMIC/rCSF/rCSM					24	182	0.0286711	1.15609	1.13565	1.17432	1.02089	2.08931
aPKC	atypical protein kinase C	CG42783	2907	CSF/CSFIC		x		x	13	223	0.0330597	1.11029	1.0784	1.13314	0.980448	-1.95517
CG15706		CG15706	4907	CSF/CSM/CSFIC/CSMIC					25	194	0.0340063	1.15126	1.1336	1.22077	1.01662	1.66244
Cep89	Centrosomal protein 89kDa homolog	CG8214	24240	CSF/CSM/CSFIC/CSMIC/rCSF/rCSM	CSF/CSM/CSFIC/CSMIC/rCSM				16	117	0.0386756	1.16277	1.142	1.17879	1.02679	2.67866
CG33160		CG33160	107557		CSF/CSFIC/rCSF				25	399	0.0481974	1.12277	1.10828	1.14183	0.991472	-0.852767
CG6084		CG6084	27551	CSF/CSFIC/rCSF					13	97	0.0621255	1.1461	1.13926	1.18834	1.01207	1.20723
CG34370		CG34370	39158	CSF/CSM/CSMIC/rCSM					25	207	0.063951	1.15061	1.14032	1.17148	1.01605	1.60504
Mco1	Multicopper oxidase-1	CG3759	15602	CSF/rCSM					24	377	0.0677265	1.11482	1.08726	1.15522	0.98445	-1.55502
CG34351		CG34351	109021	CSM/CSMIC/rCSM					25	209	0.0700464	1.15415	1.13262	1.165	1.01918	1.91791
Ance-3	Ance-3	CG17988	101665	rCSF/rCSM					23	197	0.0950322	1.17018	1.12591	1.20279	1.03333	3.33327
CG32269		CG32269	49714	CSF/CSFIC					23	352	0.108601	1.12531	1.099	1.14736	0.993712	-0.628824
Fbp2	Fat body protein 2	CG3763	33173	CSF/rCSM					24	211	0.115307	1.15417	1.13042	1.17392	1.01919	1.91932
CG8861		CG8861	5832	CSF/CSFIC					25	221	0.117038	1.15319	1.12501	1.20924	1.01833	1.83331
CG13896		CG13896	102063	CSMIC	CSM/CSFIC/CSMIC/rCSM				24	354	0.178474	1.12952	1.11095	1.14174	0.997433	-0.256704
CG15706		CG15706	108892	CSF/CSM/CSFIC/CSMIC					24	227	0.214346	1.15407	1.12832	1.17256	1.01911	1.9112
CheB38b	Chemosensory protein B 38b	CG33321	104635		rCSM				25	359	0.244421	1.1308	1.11976	1.13624	0.998558	-0.144203
CG5337		CG5337	110061	CSF					25	248	0.305954	1.14827	1.13112	1.16607	1.01399	1.39903
Trpm	Transient receptor potential cation channel, subfamily M ortholog	CG44240	30610	CSF/CSM/CSFIC/CSMIC					22	311	0.3097	1.11194	1.07794	1.17318	0.981904	-1.8096
CG8861		CG8861	102732	CSF/CSFIC					25	266	0.50625	1.1466	1.11209	1.18358	1.01251	1.25076
Exn	Ephexin	CG42665	41962	CSF					25	267	0.51906	1.14733	1.12031	1.16366	1.01316	1.31567
CG34251		CG34251	109218	rCSF					22	241	0.62395	1.13681	1.11682	1.18696	1.00387	0.386779
DCX-EMAP	Doublecortin-domain-containing echinoderm-microtubule-associated protein ortholog	CG42247	108417		CSM/CSMIC/rCSF/rCSM				25	322	0.669926	1.1365	1.1118	1.15048	1.00359	0.358874
Gs2	Glutamine synthetase 2	CG1743	32929	CSM/CSMIC	CSF/CSM/CSFIC/CSMIC/rCSF/rCSM				22	247	0.719301	1.14013	1.12329	1.16749	1.0068	0.680041
CG1942		CG1942	107788	CSM/CSMIC					24	306	0.720664	1.14138	1.12222	1.15146	1.0079	0.789938
Mid1	Mid 1 ortholog (S. cerevisiae)	CG33988	107431	rCSF/rCSM					25	282	0.72868	1.13977	1.10661	1.17825	1.00649	0.648516
ana	anachronism	CG8084	48344	CSM/CSMIC					25	288	0.819722	1.14795	1.10373	1.17169	1.01371	1.3705
CG3011		CG3011	19206	CSF/CSM/CSFIC/CSMIC/rCSF/rCSM					25	289	0.835167	1.14195	1.12067	1.15882	1.00841	0.840669
Trpm	Transient receptor potential cation channel, subfamily M ortholog	CG44240	110226	CSF/CSM/CSFIC/CSMIC					25	296	0.94471	1.13674	1.11319	1.1702	1.0038	0.380332
CG13624		CG13624	109612	CSF/CSFIC/rCSF					24	287	0.991852	1.13452	1.12238	1.16156	1.00184	0.18425
CG1315		CG1315	CG1315						24	288	1	1.13243	1.12306	1.1577	1	0

## Sheet: Validation random genes
Control RNAi 1
Gene Symbol	Gene Name	CG Number	Line	Phenotype	N	Statistic	Pvalue	Median	Q25	Q75	Fold Change	% Change
EloA	Elongin A	CG6755	110387		25	625	1.58215e-14	1.27442	1.24719	1.27936	0.849705	-15.0295
CG17646		CG17646	100378		12	300	1.07963e-09	1.08002	1.01767	1.11763	0.720092	-27.9908
CG3704		CG3704	101389		11	275	3.32887e-09	0.867329	0.78514	0.907272	0.578283	-42.1717
α-Man-I	α Mannosidase I	CG42275	100654		25	550	7.69885e-07	1.45155	1.4185	1.47399	0.967804	-3.21962
fat-spondin	fat-spondin	CG6953	105844		25	482	0.000759393	1.44359	1.40322	1.48312	0.962502	-3.74981
CG11537		CG11537	103941		23	443	0.00102893	1.46682	1.41852	1.48714	0.977986	-2.20144
CG17637		CG17637	102424		24	435	0.0063618	1.47852	1.44597	1.49324	0.98579	-1.42102
CG33262		CG33262	103502		25	441	0.0121001	1.48819	1.45553	1.49827	0.992238	-0.776219
CG10444		CG10444	107008		25	427	0.0260574	1.46598	1.43344	1.50838	0.977429	-2.25711
unc-13-4A	unc-13-4A	CG32381	109304		24	189	0.0261715	1.5289	1.4925	1.56777	1.01938	1.93815
bol	boule	CG4760	101434		24	251	0.332034	1.51843	1.47862	1.53897	1.0124	1.23987
spoon	spoonbill	CG3249	105107		25	268	0.396546	1.52283	1.48122	1.55493	1.01533	1.53304
nAChRα7	nicotinic Acetylcholine Receptor α7	CG32538	100756		25	346	0.525266	1.49409	1.45378	1.53191	0.99617	-0.382975
CG1315		CG1315	CG1315		25	312.5	1	1.49984	1.48354	1.5199	1	0
Control RNAi 2
Gene Symbol	Gene Name	CG Number	Line	Phenotype	N	Statistic	Pvalue	Median	Q25	Q75	Fold Change	% Change
CG7724		CG7724	105609		24	585	2.16e-11	1.39987	1.38256	1.43156	0.947902	-5.20981
Teh1	tipE homolog 1	CG12806	102816		25	34	1.04e-09	1.52989	1.5126	1.56533	1.03595	3.5945
CG7766		CG7766	52573		22	28	2.48e-09	1.53991	1.51465	1.5585	1.04273	4.27286
spz5	spatzle 5	CG9972	102389		25	77	9.98e-07	1.52305	1.51101	1.53889	1.03131	3.13114
maf-S	maf-S	CG9954	109303		25	501	0.000154933	1.43482	1.4234	1.46406	0.971564	-2.84356
CG10361		CG10361	16034		25	465	0.00264845	1.45147	1.42674	1.4722	0.982838	-1.7162
nmo	nemo	CG7892	104885	veins	25	184	0.0121001	1.49793	1.47121	1.51432	1.0143	1.43031
Syx5	Syntaxin 5	CG4214	104392		24	423	0.0133433	1.46069	1.43282	1.47272	0.989087	-1.09127
CG5078		CG5078	8442		25	188	0.0151942	1.49731	1.47554	1.5126	1.01388	1.38847
CG32206		CG32206	102647		25	231	0.116639	1.48599	1.46395	1.51821	1.00622	0.62161
Takl2	Tak1-like 2	CG4803	104701		25	316	0.954003	1.47724	1.45376	1.48962	1.00029	0.0289814
CG1315		CG1315	CG1315		25	312.5	1	1.47681	1.46014	1.49457	1	0

## Sheet: Overview
Phenotype	# SNPs p<10-05 in GWAS mapped to genes	tested (%)	validated p<0.001 Wilcoxon test (%)		* TOP 20 chosen as candidates
FaSTLMM
rCSF	27	12 (44%)	08 (67%)
rCSM	17	9(41%)	06 (67%)
CSF	30	15 (50%)	10 (67%)
CSM	13	9 (69%)	06 (67%)
CSFIC	26	14 (54%)	11 (79%)
CSMIC	17	11 (65%)	07 (64%)
VEGAS	# top genes	tested (%)	validated p<0.001 Wilcoxon test (%)
rCSF	20*	07 (35%)	05 (71%)
rCSM	20*	07 (35%)	03 (43%)
CSF	20*	05 (25%)	04 (80%)
CSM	20*	07 (35%)	04 (57%)
CSFIC	20*	05 (25%)	03 (60%)
CSMIC	20*	08 (40%)	05 (63%)

## Sheet: Fisher's exact test
threshold Wilcoxon test	two-sided p-value Fisher's exact test	total genes candidates	total genes random	validated genes candidates	validated genes random
p<0.05	0.52	43	22	36	17
p<0.01	0.05	43	22	33	11
p<0.001	0.02	43	22	30	8
p<0.0001	0.04	43	22	25	6
