# Supplementary material for: Genome-Wide Analysis Reveals Novel Regulators of Growth in Drosophila melanogaster
Source: PLoS Genet. 2016 Jan 11;12(1):e1005616. doi: 10.1371/journal.pgen.1005616 (PMC4709145; doi:10.1371/journal.pgen.1005616)
Supplement: S8 Table — Focal genes: Genes previously implied in growth regulation or wing development that were used as focal genes for epistasis. Top interactions (p<10−09) for female absolute inversion corrected wing size (CSFIC), male absolute inversion corrected wing size (CSMIC), female absolute inversion corrected body size (IODFIC), male absolute inversion corrected body size (IODMIC), female relative wing size (rCSF) and male relative wing size (rCSM). X is the interactor locus and Y the focal (= previously known) locus. (XLS) [file pgen.1005616.s019.xls]

## Sheet: focal genes
Gene Symbol	Gene Name	CG Number
AGO1	Argonaute-1	CG6671
Akt1	Akt1	CG4006
alc	alicorn	CG8057
aos	argos	CG4531
Atg6	Autophagy-specific gene 6 (Beclin)	CG5429
B4	B4 (Susi)	CG9239
babo	baboon	CG8224
botv	brother of tout velou	CG15110
brat	brain tumor	CG10719
bun	bunched	CG42281
Cdk4	Cyclin-dependent kinase 4	CG5072
CG2747	CG2747	CG2747
chico	chico	CG5686
chinmo	Chronologically inappropriate morphogenesis	CG31666
chrb	charybde	CG7533
cnk	connector enhancer of ksr	CG6556
crb	crumbs	CG6383
Csk	C-terminal Src kinase (CG17309)	CG42317
csk	costakink
CycD	CyclinD	CG9096
CycG	CyclinG	CG11525
ds	dachsous	CG17941
ed	echnoid	CG12676
Egfr	epidermal growth factor receptor (torpedo)	CG10079
Ext2	Ext2 (sotv)	CG8433
fab1	fab1	CG6355
foxo	forkhead box, subgroup O	CG3143
gig	gigas (TSC2)	CG6975
GlcT-1	Ceramide glucosyltransferase	CG6437
H	Hairless	CG5460
Hph	HIF prolyl hydroxylase (CG31543)	CG44015
hpo	hippo	CG11228
ImpL2	Ecdysone-inducible gene L2	CG15009
InR	Insulin-like receptor	CG18402
kis	kismet	CG3696
lig	lingerer	CG8715
lilli	Lilliputian	CG8817
Lk6	Lk6	CG17342
Lnk	Lnk	CG17367
lola	longitudinals lacking	CG12052
Madm	MLF-1adaptor molecule	CG1098
MAPk-Ak2	MAP kinase activated proteinkinase-2 (MK2)	CG3086
mask	multiple ankyrin repeats single KH domain	CG33106
mats	mob as tumor suppressor	CG13852
mi	minus	CG5360
nct	nicastrin	CG7012
Np	Notopleural	CG34350
Patronin	Patronin	CG33130
Pi3K21B	Pi3K21B (p60)	CG2699
Pi3K59F	Phosphatidylinositol 3 kinase 59F (Vps34)	CG5373
Pi3K92E	Pi3K92E (Dp110)	CG4141
Pten	PTEN	CG5671
Ptp99A	Protein tyrosine phosphatase 99A	CG2005
Ptpmeg	Ptpmeg	CG1228
rasp	rasp	CG11495
Rheb	Ras homolog enriched in brain ortholog	CG1081
RnrL	Ribonucleoside diphosphate reductase large subunit	CG5371
S6k	RPS6-p70-protein kinase	CG10539
sav	salvador	CG33193
scyl	scylla	CG7590
serp	serpentine	CG32209
shot	short stop	CG18076
slik	Sterile20-like kinase	CG4527
SNF1A	SNF1A/AMP-activated protein kinase	CG3051
SNF4Agamma	SNF4/AMPactivated protein kinase gamma subunit	CG17299
Thor	Thor(4EBP)	CG8846
Tor	Target of rapamycin	CG5092
trol	terribly reduced optic lobes (CG7981)	CG33950
Tsc1	TSC1	CG6147
ttv	tout-velou	CG10117
wts	warts	CG12072
ab	abrupt	CG43860
ash2	absent, small, or homeotic discs 2	CG6677
ara	araucan	CG10571
Awh	Arrowhead	CG1072
Antp	Antennapedia	CG1028
ap	apterous	CG8376
al	aristaless	CG3935
BH-1	BarH1	CG5529
BH-2	BarH2	CG5488
Bx	Beadex	CG44425
bs	blistered	CG3411
brm	brahma	CG5942
Bap55	Brahma associated protein 55kD	CG6546
brk	brinker	CG9653
br	broad	CG11491
caup	caupolican	CG10605
cic	Capicua	CG43122
CHIP	Chip	CG5203
cg	combgap	CG8367
crc	cryptocephal	CG8669
ct	cut	CG11387
dve	defective proventriculus	CG5799
Dll	distal-less	CG3629
vvl	drifter	CG10037
Doc1	Dorsocross	CG5133
EcR	ecdysone receptor	CG1765
elB	elbow	CG4220
en	engrailed	CG9015
E(spl)...	Enhancer of split complex	CG6104
E(spl)...	Enhancer of split complex	CG8346
E(spl)...	Enhancer of split complex	CG6099
E(spl)...	Enhancer of split complex	CG6096
E(spl)...	Enhancer of split complex	CG8354
E(spl)...	Enhancer of split complex	CG8333
E(spl)...	Enhancer of split complex	CG8365
E(spl)...	Enhancer of split complex	CG8337
E(spl)...	Enhancer of split complex	CG8328
E(spl)...	Enhancer of split complex	CG14548
E(spl)m7-HLH	E(spl) region transcript m7	CG8361
esg	escargot	CG3758
exd	extradenticle	CG8933
emc	extra machrochaete	CG1007
osa	eyelid	CG7467
grn	grain	CG9656
grh	grainy head	CG42311
Gug	Grunge	CG6964
hth	homothorax	CG17117
inv	invected	CG17835
ken	ken and barbie	CG5575
klu	klumpfuss	CG12296
lola	longitudinals lacking	CG12052
sens	Lyra (senseless)	CG32120
Med	Medea	CG1775
Mnt	Mnt	CG13316
mor	moira	CG18740
Dr	muscle segment homeobox (Drop)	CG1897
Myb	Myb	CG9045
Mrtf	Myocardin-related transcription factor	CG32296
nab	nab	CG33545
net	net	CG11450
Nipped-A	Nipped-A	CG33554
Optix	Optix	CG18455
bi	optomotor blind (omb, bifid)	CG3578
Poxn	paired box neuro	CG8246
pan	pangolin	CG34403
pnr	pannier	CG3978
Gcn5	Pcaf	CG4107
nub	pdm-1 (nubbin)	CG34395
per	period	CG2647
ph-p	polyhomeotic	CG18412
ph-d	polyhomeotic	CG3895
repo	reversed polarity	CG31240
Rfx	Rfx	CG6312
Rtf1	Rtf1	CG10955
sd	scalloped	CG8544
shn	schnurri	CG7734
Scm	Sex combs on midleg	CG9495
sbb	scribbler	CG5580
Set2	Set2	CG1716
sna	snail	CG3956
Sox15	Sox box protein 15	CG8404
salm	spalt	CG6464
ss	spineless	CG6993
Su(z)12	Su(12)z	CG8013
tap	target of Pox-n	CG7659
Taf1	TBP-associated factor 250kD	CG17603
ush	u-shaped	CG2762
usp	ultraspiracle	CG4380
vg	vestigial	CG3830
vri	vrille	CG14029
hop	hopscotch	CG1594
Stat92E	marelle	CG4257
os	outstretched, unpaired	CG5993
app	approximated	CG42318
Axud1	Axud1	CG4272
ban	bantam	CR43018
by	blistery	CG9379
burs	bursicon	CG13419
chm	chameau	CG5229
Chc	Clathrin heavy chain	CG9012
Cg25C	Collagen type IV	CG4145
ck	crinkled	CG7595
cv	crossveinless	CG12410
Csk	C-terminal Src kinase	CG42317
Cdk4	Cyclin-dependent kinase 4	CG5072
CycG	Cyclin G	CG11525
d	dachs	CG42840
daw	dawdle	CG16987
debcl	death executioner Bcl-2 homologue	CG33134
fry	furry	CG32045
how	held out wings	CG10293
Hrs	Hepatocyte growth factor regulated tyrosine kinase substrate	CG2903
hrg	hiiragi	CG9854
heph	hephaestus	CG31000
hmgcr	HMG Coenzyme A reductase	CG10367
ik2	ik2	CG2615
krz	kurtz	CG1487
mats	mats	CG13852
mib1	mind-bomb	CG5841
Moe	Moesin-like	CG10701
msk	moleskin	CG7935
mts	microtubule star	CG7109
mwh	multiple wing hairs	CG43772
Pax	Paxillin	CG31794
pit	pitchoune	CG6375
pk	prickle	CG11084
Rab23	Rab23	CG2108
tum	RacGAP50C (tumbleweed)	CG13345
scaf	scarface	CG11066
shi	shibire	CG18102
rasp	sightless	CG11495
Snoo	snoN	CG34421
sqh	spaghetti squash	CG3595
stck	steamer duck	CG7954
stg	string	CG1395
Su(fu)	Suppressor of fused	CG6054
Tctp	Translationally controlled tumor protein	CG4800
trc	tricornered	CG8637
vari	varicose	CG9326
wts	warts	CG12072
W	Wrinkled	CG5123
yki	yorkie	CG4005
aos	Argos	CG4531
Egfr	Egf-r	CG10079
rho	rhomboid	CG1004
sl	small wing	CG4200
S	Star	CG4385
cv-2	crossveinless 2	CG15671
dpp	decapentaplegic	CG9885
fng	fringe	CG10580
hh	hedgehog	CG4637
LanA	Laminin A	CG10236
shf	shifted	CG3135
sog	short gastrulation	CG9224
Tig	Tiggrin	CG11527
wg	wingless	CG4889
vn	vein	CG10491
Notum	Notum	CG13076
arr	arrow	CG5912
babo	baboon	CG8224
Cad99c	Cad99C	CG31009
caps	capricious	CG11282
ds	dachsous	CG17941
fz3	Dfrizzled-3	CG16785
disp	dispatched	CG2019
dally	division abnormally delayed	CG4974
ed	echinoid	CG12676
fred	friend of echinoid	CG31774
btl	Fibroblast growth factor receptor 1	CG32134
fj	four-jointed	CG10917
fz	frizzled	CG17697
fw	furrowed	CG1500
Glt	Glutactin	CG9280
hbs	hibris	CG7449
mys	myospheroid	CG1560
Itp-r83A	Inositol 1,4,5,-tris-phosphate receptor	CG1063
InR	Insulin-like receptor	CG18402
kek1	kekkon-1	CG12283
Ptp69D	Protein tyrosine phosphatase 69D	CG10975
rst	roughest	CG4125
sax	saxophone	CG1891
put	punt	CG7904
stan	starry night	CG11895
Vang	strabismus (Van Gogh)	CG8075
Syx1A	Syntaxin 1A	CG31136
trn	tartan	CG11280
tkv	thick veins	CG14026
tlr-2	tolloid-related 2
wit	wishful thinking	CG10776
Brd	Bearded	CG3096
bun	bunched	CG42281
gro	groucho	CG8384
H	Hairless	CG5460
h	hairy	CG6494
mam	mastermind	CG8118
scrt	scratch	CG1130
sno	strawberry notch	CG44436
Abl	Abl oncogene	CG4032
Apc2	Adenomatous polypopsis coli tumor suppressor homolog 2	CG6193
Ark	Apaf-1-related-killer	CG6829
a	arc	CG6741
Axn	Axin	CG7926
brat	brain tumor	CG10719
cno	canoe	CG42312
capt	capulet	CG33979
Cdc42	Cdc42	CG12530
chico	chico	CG5686
csw	corkscrew	CG3954
cos	costa	CG1708
Dad	Daughters against dpp	CG5201
dgo	diego	CG12342
dlt	discs lost	CG32315
ex	expanded	CG4114
gig	gigas	CG6975
gish	gilgamesh	CG6963
Gsalpha	G protein salpha	CG2835
Gbeta13F	G protein beta subunit 13F	CG10545
hdc	headcase	CG15532
hep	hemipterous	CG4353
hyd	hyperplastic discs	CG9484
insc	inscuteable	CG11312
kst	karst	CG12008
kibra	kibra	CG33967
lqf	liquid facets	CG8532
lft	lowfat	CG13139
Mer	Merlin	CG14228
Mad	Mothers against dpp	CG12399
nmo	nemo	CG7892
Nf1	Neurofibromin 1	CG8318
Nos	Nitric oxide synthase	CG6713
p38b	p38b	CG7393
Pak	PAK-kinase	CG10295
Pi3K59F	Phosphotidylinositol 3 kinase 59F	CG5373
phl	pole hole	CG2845
Pten	Pten	CG5671
puc	puckered	CG7850
Rac1	Rac1	CG2248
Rheb	Rheb	CG1081
Rho1	Rho1	CG8416
rok	rho-associated kinase	CG9774
rl	rolled	CG12559
S6kII	RPS6-protein kinase-II	CG17596
S6k	RPS6-p70-protein kinase	CG10539
sktl	skittles	CG9985
ssh	slingshot	CG6238
spict	spichthyin	CG12292
spen	split ends	CG18497
smt3	Sumo/smt3	CG4494
slmb	supernumerary limbs	CG3412
rhea	Talin	CG6831
Traf4	TNF-receptor-associated factor 1	CG3048
tws	twins	CG6235
wls	wntless	CG6210
zip	zipper	CG15792
N	Notch	CG3936
Su(H)	Suppressor of Hairless	CG3497
Dl	Delta	CG3619
Ser	Serrate	CG6127
dm	Myc	CG10798
upd-2	unpaired 2	CG5988
upd-3	unpaired 3	CG33542
aop	anterior open	CG3166

## Sheet: CSFIC
Chromosome X	Position X	Gene Symbol X	SNP Location X	Site Class X	Lines with minor allele X	MAF X	Mean Coverage X	Major Allele X	Minor Allele X	Reference SNP X	Beta	Chisquare	Pvalue	Chromosome Y	Position Y	Gene Symbol Y	SNP Location Y	Site Class Y	Lines with minor allele Y	MAF Y	Mean Coverage Y	Major Allele Y	Minor Allele Y	Reference SNP Y
3L	19018341	nkd	nkd-in	intronic	43	0.26875	11	C	T	C	0.64929	55.6204	8.79065e-14	3R	25289439	Ptp99A	Ptp99A-in	intronic	67	0.41358	14	T	C	T
3R	13551931	Fsh	Fsh-in	intronic	79	0.496855	15	T	A	T	-0.6024	51.586	6.8528e-13	2R	9796093	shot	shot-in	intronic	44	0.273292	15	G	A	A
X	10854595	C901	-3645	intergenic	68	0.407186	7	A	C	A	-0.60946	50.2444	1.35742e-12	3L	12237341	app	app-in	intronic	33	0.198795	15	G	A	G
X	10854595	CG16922	3839	intergenic	68	0.407186	7	A	C	A	-0.60946	50.2444	1.35742e-12	3L	12237341	app	app-in	intronic	33	0.198795	15	G	A	G
X	10854595	Myo10A	Myo10A-in	intronic	68	0.407186	7	A	C	A	-0.60946	50.2444	1.35742e-12	3L	12237341	app	app-in	intronic	33	0.198795	15	G	A	G
3L	3740502	CG32264	CG32264-in	intronic	53	0.319277	21	T	A	A	0.58751	49.051	2.49397e-12	3L	8462392	Gug	Gug-in	intronic	66	0.39759	13	A	C	C
3L	19018381	nkd	nkd-in	intronic	44	0.269939	13	T	A	T	0.63094	48.956	2.61768e-12	3R	25289439	Ptp99A	Ptp99A-in	intronic	67	0.41358	14	T	C	T
X	18732449	Pvf1	Pvf1-in	intronic	19	0.114458	7	G	T	G	-0.77064	48.476	3.34354e-12	3R	17404796	InR	InR:9	synonymous	74	0.468354	19	T	C	T
X	18732449	Pvf1	Pvf1-in	intronic	19	0.114458	7	G	T	G	-0.77064	48.476	3.34354e-12	3R	17404796	InR	InR:9	synonymous	74	0.468354	19	T	C	T
2L	5723010	sip1	sip1:2	synonymous	18	0.109756	18	A	G	A	-0.78573	48.408	3.46149e-12	2R	10417036	ttv	ttv-in	intronic	76	0.469136	11	A	G	G
3L	19024538	nkd	nkd-in	intronic	39	0.240741	12	C	A	C	0.62482	48.3562	3.55411e-12	3R	25289439	Ptp99A	Ptp99A-in	intronic	67	0.41358	14	T	C	T
3R	17253401	lbl	lbl-in	intronic	56	0.347826	16	G	A	G	0.59724	47.7814	4.76496e-12	X	7526536	ct	ct-in	intronic	52	0.319018	7	T	C	T
3R	14416263	CG14306	-559	intergenic	42	0.265823	19	T	C	T	0.71423	47.7134	4.93298e-12	2R	6595465	stan	stan-cds	synonymous	45	0.276074	17	A	C	A
3R	14416263	fray	1088	intergenic	42	0.265823	19	T	C	T	0.71423	47.7134	4.93298e-12	2R	6595465	stan	stan-cds	synonymous	45	0.276074	17	A	C	A
3R	14416263	CG7694	CG7694-cds	synonymous	42	0.265823	19	T	C	T	0.71423	47.7134	4.93298e-12	2R	6595465	stan	stan-cds	synonymous	45	0.276074	17	A	C	A
2L	20382907	CG10947	-2386	intergenic	28	0.178344	11	A	G	A	0.7317	47.6337	5.1379e-12	2L	4365475	Traf4	Traf4-in	intronic	34	0.204819	11	C	G	C
2L	20382907	CG16798	552	intergenic	28	0.178344	11	A	G	A	0.7317	47.6337	5.1379e-12	2L	4365475	Traf4	Traf4-in	intronic	34	0.204819	11	C	G	C
2L	4300897	tutl	tutl-in	intronic	48	0.296296	13	C	A	A	0.58494	47.0483	6.92605e-12	3R	20060205	mask	mask-in	intronic	72	0.444444	18	T	C	T
X	10810416	CG11203	CG11203:6	synonymous	33	0.20122	14	C	T	C	0.71106	46.992	7.12755e-12	2R	13720311	grh	grh-u5	UTR	42	0.281879	15	G	A	G
3L	19039759	Acp76A	-4098	intergenic	36	0.222222	12	T	G	T	0.64903	46.4896	9.2106e-12	3R	25289439	Ptp99A	Ptp99A-in	intronic	67	0.41358	14	T	C	T
3L	19039759	nkd	1328	intergenic	36	0.222222	12	T	G	T	0.64903	46.4896	9.2106e-12	3R	25289439	Ptp99A	Ptp99A-in	intronic	67	0.41358	14	T	C	T
3L	17414818	sec3	-69	intergenic	52	0.317073	11	A	G	A	0.73497	46.2905	1.01957e-11	3R	26143090	hdc	hdc-in	intronic	18	0.140625	2	C	T	T
3L	17414818	noe	20370	intergenic	52	0.317073	11	A	G	A	0.73497	46.2905	1.01957e-11	3R	26143090	hdc	hdc-in	intronic	18	0.140625	2	C	T	T
X	18732449	Pvf1	Pvf1-in	intronic	19	0.114458	7	G	T	G	0.74093	46.0754	1.13788e-11	X	21932900	S6kII	S6kII-cds	synonymous	67	0.401198	19	A	T	A
3R	25054596	CG15817	-292	intergenic	43	0.265432	12	A	G	A	-0.70428	45.5771	1.46748e-11	X	18460247	Bx	Bx-in	intronic	48	0.294479	10	A	C	C
3R	25054596	CG14507	1149	intergenic	43	0.265432	12	A	G	A	-0.70428	45.5771	1.46748e-11	X	18460247	Bx	Bx-in	intronic	48	0.294479	10	A	C	C
2L	5723010	sip1	sip1:2	synonymous	18	0.109756	18	A	G	A	-0.80018	45.5448	1.49191e-11	2R	10417001	ttv	ttv-in	intronic	69	0.425926	11	T	A	A
3L	15388358	CG33259	-12591	intergenic	67	0.421384	14	C	T	T	0.52215	45.506	1.52171e-11	3L	1793194	dlt	dlt-PA	synonymous	68	0.412121	19	C	G	C
3L	15388358	Toll-6	53047	intergenic	67	0.421384	14	C	T	T	0.52215	45.506	1.52171e-11	3L	1793194	dlt	dlt-PA	synonymous	68	0.412121	19	C	G	C
3L	19021703	nkd	nkd-in	intronic	40	0.251572	16	C	T	C	0.63253	45.1223	1.85107e-11	3R	25289439	Ptp99A	Ptp99A-in	intronic	67	0.41358	14	T	C	T
3R	25054603	CG15817	-285	intergenic	43	0.265432	12	A	G	A	-0.69847	45.0987	1.87347e-11	X	18460247	Bx	Bx-in	intronic	48	0.294479	10	A	C	C
3R	25054606	CG15817	-282	intergenic	44	0.269939	11	A	G	A	-0.69847	45.0987	1.87347e-11	X	18460247	Bx	Bx-in	intronic	48	0.294479	10	A	C	C
3R	25054603	CG14507	1156	intergenic	43	0.265432	12	A	G	A	-0.69847	45.0987	1.87347e-11	X	18460247	Bx	Bx-in	intronic	48	0.294479	10	A	C	C
3R	25054606	CG14507	1159	intergenic	44	0.269939	11	A	G	A	-0.69847	45.0987	1.87347e-11	X	18460247	Bx	Bx-in	intronic	48	0.294479	10	A	C	C
3L	15388354	CG33259	-12595	intergenic	66	0.417722	15	G	C	C	0.51289	44.91	2.06298e-11	3L	1793194	dlt	dlt-PA	synonymous	68	0.412121	19	C	G	C
3L	15388354	Toll-6	53043	intergenic	66	0.417722	15	G	C	C	0.51289	44.91	2.06298e-11	3L	1793194	dlt	dlt-PA	synonymous	68	0.412121	19	C	G	C
X	6439482	CG34417	CG34417-in	intronic	40	0.239521	13	C	A	C	0.65264	44.9089	2.06417e-11	2L	12542069	bun	bun-in	intronic	34	0.213836	13	G	A	G
X	6439482	CG34417	CG34417-in	intronic	40	0.239521	13	C	A	C	0.65264	44.9089	2.06417e-11	2L	12542069	bun	bun-in	intronic	34	0.213836	13	G	A	G
3L	19033896	nkd	nkd-in	intronic	36	0.222222	13	C	A	C	0.62739	44.6456	2.36126e-11	3R	25289439	Ptp99A	Ptp99A-in	intronic	67	0.41358	14	T	C	T
X	9197561	lz	lz-u3	UTR	27	0.184932	5	C	A	C	0.66733	44.5585	2.46874e-11	2R	9908586	mam	mam-in	intronic	45	0.276074	14	T	C	T
X	22091456	CG12446	-119667	intergenic	58	0.3625	6	T	G	T	-0.52278	44.3678	2.72133e-11	3R	25301967	Ptp99A	Ptp99A-in	intronic	66	0.409938	14	T	G	T
X	22091456	Cda4	56911	intergenic	58	0.3625	6	T	G	T	-0.52278	44.3678	2.72133e-11	3R	25301967	Ptp99A	Ptp99A-in	intronic	66	0.409938	14	T	G	T
3R	16036858	cic	-41634	intergenic	75	0.465839	15	A	G	A	0.54943	44.2352	2.91192e-11	2R	6706710	dgo	dgo-in	intronic	42	0.265823	11	A	G	A
3R	16036858	CG17199	1345	intergenic	75	0.465839	15	A	G	A	0.54943	44.2352	2.91192e-11	2R	6706710	dgo	dgo-in	intronic	42	0.265823	11	A	G	A
3R	16036858	CG34139	CG34139-u5	intronic	75	0.465839	15	A	G	A	0.54943	44.2352	2.91192e-11	2R	6706710	dgo	dgo-in	intronic	42	0.265823	11	A	G	A
2R	12972080	Sply	-3859	intergenic	46	0.282209	11	T	C	T	-0.6212	44.2123	2.94624e-11	3R	20130005	crb	crb-in	intronic	52	0.329114	10	T	A	T
2R	12972080	CG30460	3318	intergenic	46	0.282209	11	T	C	T	-0.6212	44.2123	2.94624e-11	3R	20130005	crb	crb-in	intronic	52	0.329114	10	T	A	T
3R	21018939	CG13653	-2343	intergenic	22	0.131737	20	G	A	A	-0.71	44.2119	2.94689e-11	3R	11865887	pnr	pnr-cds	synonymous	54	0.346154	13	G	A	G
3R	21018939	dan	411	intergenic	22	0.131737	20	G	A	A	-0.71	44.2119	2.94689e-11	3R	11865887	pnr	pnr-cds	synonymous	54	0.346154	13	G	A	G
3R	21018939	CG34110	CG34110-in	intronic	22	0.131737	20	G	A	A	-0.71	44.2119	2.94689e-11	3R	11865887	pnr	pnr-cds	synonymous	54	0.346154	13	G	A	G
3R	22466275	TwdlD	TwdlD-cds	synonymous	64	0.415584	14	G	A	G	-0.7412	44.1985	2.96705e-11	2R	18039962	a	a-in	intronic	21	0.130435	13	T	C	T
X	8600401	Hexo2	-3286	intergenic	68	0.43038	7	G	A	A	0.53687	44.181	2.99372e-11	2R	6595664	stan	stan:5	synonymous	56	0.345679	13	C	T	C
X	8600401	CG11294	12814	intergenic	68	0.43038	7	G	A	A	0.53687	44.181	2.99372e-11	2R	6595664	stan	stan:5	synonymous	56	0.345679	13	C	T	C
3L	19038957	Acp76A	-4900	intergenic	35	0.220126	9	G	A	G	0.63413	44.1322	3.06922e-11	3R	25289439	Ptp99A	Ptp99A-in	intronic	67	0.41358	14	T	C	T
3L	19038957	nkd	526	intergenic	35	0.220126	9	G	A	G	0.63413	44.1322	3.06922e-11	3R	25289439	Ptp99A	Ptp99A-in	intronic	67	0.41358	14	T	C	T
X	10122029	CG34408	CG34408-in	intronic	52	0.317073	13	C	T	T	-0.65458	44.0516	3.19831e-11	2R	9904488	mam	mam-in	intronic	53	0.329193	12	T	A	A
3L	13069558	CG17300	-9929	intergenic	53	0.325153	17	G	A	G	-0.52835	43.9668	3.34e-11	2L	651725	ds	ds-in	intronic	71	0.440994	13	C	T	C
3L	13069558	CG17300	-9929	intergenic	53	0.325153	17	G	A	G	-0.52835	43.9668	3.34e-11	2L	651725	ds	ds-in	intronic	71	0.440994	13	C	T	C
3L	13069558	CG34429	12529	intergenic	53	0.325153	17	G	A	G	-0.52835	43.9668	3.34e-11	2L	651725	ds	ds-in	intronic	71	0.440994	13	C	T	C
3L	13069558	CG34429	12529	intergenic	53	0.325153	17	G	A	G	-0.52835	43.9668	3.34e-11	2L	651725	ds	ds-in	intronic	71	0.440994	13	C	T	C
3R	16521221	Oamb	Oamb-in	intronic	49	0.308176	12	C	A	C	-0.6293	43.9647	3.34349e-11	2R	6706846	dgo	dgo-u5	UTR	46	0.283951	15	G	A	G
2R	16531110	CG33786	CG33786-u5	synonymous	53	0.321212	23	C	T	C	-0.52496	43.7467	3.73751e-11	2R	7369838	inv	inv-in	intronic	55	0.337423	12	C	T	T
2R	16531110	CG33785	CG33785-cds	synonymous	53	0.321212	23	C	T	C	-0.52496	43.7467	3.73751e-11	2R	7369838	inv	inv-in	intronic	55	0.337423	12	C	T	T
2L	20382907	CG10947	-2386	intergenic	28	0.178344	11	A	G	A	0.72563	43.7442	3.74223e-11	2L	4365469	Traf4	Traf4-in	intronic	35	0.209581	11	G	T	G
2L	20382907	CG16798	552	intergenic	28	0.178344	11	A	G	A	0.72563	43.7442	3.74223e-11	2L	4365469	Traf4	Traf4-in	intronic	35	0.209581	11	G	T	G
3L	19033895	nkd	nkd-in	intronic	36	0.220859	13	C	A	C	0.60592	43.7268	3.7757e-11	3R	25289439	Ptp99A	Ptp99A-in	intronic	67	0.41358	14	T	C	T
2R	9483016	CG6197	CG6197:2	synonymous	61	0.378882	17	G	A	A	-0.71694	43.6914	3.84452e-11	2R	13724833	grh	grh-in	intronic	14	0.0843373	16	T	A	T
3R	20386313	CG13624	CG13624:4	missense	58	0.358025	19	G	A	A	-0.62926	43.6719	3.88301e-11	2L	1065390	S	S-in	intronic	42	0.264151	18	G	T	G
3L	19027633	nkd	nkd-in	intronic	39	0.242236	12	C	T	C	0.61873	43.6055	4.01703e-11	3R	25289439	Ptp99A	Ptp99A-in	intronic	67	0.41358	14	T	C	T
2R	9483010	CG6197	CG6197:2	synonymous	61	0.378882	18	T	A	A	-0.72228	43.5232	4.18967e-11	2R	13724833	grh	grh-in	intronic	14	0.0843373	16	T	A	T
3R	17253412	lbl	lbl-in	intronic	65	0.401235	16	G	C	G	0.57564	43.5135	4.21046e-11	X	7526536	ct	ct-in	intronic	52	0.319018	7	T	C	T
X	10854594	C901	-3646	intergenic	68	0.407186	8	G	T	G	-0.58394	43.4173	4.4227e-11	3L	12237341	app	app-in	intronic	33	0.198795	15	G	A	G
X	10854594	CG16922	3838	intergenic	68	0.407186	8	G	T	G	-0.58394	43.4173	4.4227e-11	3L	12237341	app	app-in	intronic	33	0.198795	15	G	A	G
X	10854594	Myo10A	Myo10A-in	intronic	68	0.407186	8	G	T	G	-0.58394	43.4173	4.4227e-11	3L	12237341	app	app-in	intronic	33	0.198795	15	G	A	G
X	10122041	CG34408	CG34408-in	intronic	52	0.322981	12	G	T	T	-0.64339	43.2973	4.7024e-11	2R	9904488	mam	mam-in	intronic	53	0.329193	12	T	A	A
3L	19027199	nkd	nkd-in	intronic	41	0.25625	14	A	G	A	0.60322	43.2815	4.74041e-11	3R	25289439	Ptp99A	Ptp99A-in	intronic	67	0.41358	14	T	C	T
2R	9482938	CG6197	CG6197:2	synonymous	62	0.385093	20	A	C	C	-0.70885	43.1411	5.09304e-11	2R	13724833	grh	grh-in	intronic	14	0.0843373	16	T	A	T
2R	5794867	Fmrf	Fmrf-in	intronic	52	0.327044	20	T	A	A	0.564	43.1322	5.11627e-11	2L	4108566	ed	ed-in	intronic	65	0.408805	19	G	A	G
2R	5794867	Fmrf	Fmrf-in	intronic	52	0.327044	20	T	A	A	0.564	43.1322	5.11627e-11	2L	4108566	ed	ed-in	intronic	65	0.408805	19	G	A	G
2R	20119905	nord	-10881	intergenic	35	0.212121	20	G	A	G	-0.67792	43.1278	5.12793e-11	2L	2919628	lilli	lilli-in	intronic	55	0.345912	11	G	C	C
2R	20119905	CG30419	2594	intergenic	35	0.212121	20	G	A	G	-0.67792	43.1278	5.12793e-11	2L	2919628	lilli	lilli-in	intronic	55	0.345912	11	G	C	C
3R	14354611	fru	fru-in	intronic	52	0.329114	11	G	A	G	0.55405	43.0422	5.3572e-11	3R	25277479	Ptp99A	Ptp99A-in	intronic	51	0.31677	22	C	T	T
3R	21018939	CG13653	-2343	intergenic	22	0.131737	20	G	A	A	-0.70252	43.0312	5.38723e-11	3R	11866093	pnr	pnr-u3	UTR	56	0.35443	19	C	G	C
3R	21018939	dan	411	intergenic	22	0.131737	20	G	A	A	-0.70252	43.0312	5.38723e-11	3R	11866093	pnr	pnr-u3	UTR	56	0.35443	19	C	G	C
3R	21018939	CG34110	CG34110-in	intronic	22	0.131737	20	G	A	A	-0.70252	43.0312	5.38723e-11	3R	11866093	pnr	pnr-u3	UTR	56	0.35443	19	C	G	C
X	1611956	Scgdelta	-27953	intergenic	63	0.377246	14	T	C	T	-0.67669	42.9275	5.68066e-11	3L	8442861	Gug	-161	intergenic	26	0.160494	8	T	A	T
X	1611956	CG3795	7760	intergenic	63	0.377246	14	T	C	T	-0.67669	42.9275	5.68066e-11	3L	8442861	Gug	-161	intergenic	26	0.160494	8	T	A	T
X	1627075	Scgdelta	-12834	intergenic	38	0.227545	14	T	A	T	-0.64789	42.8812	5.81682e-11	2R	18039441	a	a-in	intronic	52	0.33121	17	T	C	T
X	1627075	CG3795	22879	intergenic	38	0.227545	14	T	A	T	-0.64789	42.8812	5.81682e-11	2R	18039441	a	a-in	intronic	52	0.33121	17	T	C	T
X	10122022	CG34408	CG34408-in	intronic	52	0.313253	11	G	C	C	-0.63981	42.8669	5.85936e-11	2R	9904488	mam	mam-in	intronic	53	0.329193	12	T	A	A
X	10122021	CG34408	CG34408-in	intronic	52	0.313253	13	G	T	T	-0.64351	42.8474	5.91796e-11	2R	9904488	mam	mam-in	intronic	53	0.329193	12	T	A	A
3L	12565676	ara	-8098	intergenic	63	0.377246	16	C	G	C	-0.49855	42.7907	6.09203e-11	3L	9626818	fry	fry-u3	synonymous	76	0.460606	19	A	T	T
3L	12565676	sowah	54	intergenic	63	0.377246	16	C	G	C	-0.49855	42.7907	6.09203e-11	3L	9626818	fry	fry-u3	synonymous	76	0.460606	19	A	T	T
2R	18380653	CG4610	CG4610-PA	synonymous	68	0.407186	19	C	A	C	0.56447	42.7772	6.13425e-11	3L	330235	Ptpmeg	Ptpmeg-in	intronic	56	0.335329	10	G	C	G
3L	5354390	CG4769	CG4769-in	intronic	35	0.214724	10	A	C	A	0.57495	42.7006	6.3793e-11	X	13308521	Set2	Set2-cds	missense	66	0.402439	10	G	A	G
2R	17885496	CG34370	CG34370-in	intronic	55	0.345912	16	G	T	G	-0.51134	42.6293	6.61595e-11	3R	21854790	HLHm5	HLHm5-u3	UTR	63	0.396226	20	C	T	T
3R	24976742	ligatin	ligatin-PA	synonymous	64	0.395062	12	A	T	A	0.51015	42.6274	6.62257e-11	3R	16991068	SNF4Agamma	SNF4Agamma-in	intronic	54	0.346154	13	T	A	T
3L	13936755	CG32137	CG32137-in	intronic	64	0.392638	9	C	A	C	0.60768	42.5932	6.73922e-11	2L	7422359	chm	chm-u3	UTR	38	0.238994	14	A	G	G
3L	9840725	Gap1	Gap1-in	intronic	82	0.491018	11	A	G	G	-0.48867	42.5837	6.77199e-11	2R	9889764	mam	mam-in	intronic	66	0.415094	12	T	G	T
X	1607086	Scgdelta	-32823	intergenic	57	0.343373	11	C	A	C	-0.67533	42.5418	6.9189e-11	3L	8442861	Gug	-161	intergenic	26	0.160494	8	T	A	T
X	1607086	CG3795	2890	intergenic	57	0.343373	11	C	A	C	-0.67533	42.5418	6.9189e-11	3L	8442861	Gug	-161	intergenic	26	0.160494	8	T	A	T
3L	19025347	nkd	nkd-in	intronic	38	0.234568	16	C	G	C	0.59346	42.4518	7.24448e-11	3R	25289439	Ptp99A	Ptp99A-in	intronic	67	0.41358	14	T	C	T
2R	13026724	CG43103	-232	intergenic	63	0.388889	16	G	A	A	0.50753	42.3986	7.44446e-11	2R	12468240	Cdk4	Cdk4-in	intronic	65	0.408805	15	A	T	T
2R	13026724	CG43103	-232	intergenic	63	0.388889	16	G	A	A	0.50753	42.3986	7.44446e-11	2R	12468240	Cdk4	Cdk4-in	intronic	65	0.408805	15	A	T	T
2R	13026724	CG11395	387	intergenic	63	0.388889	16	G	A	A	0.50753	42.3986	7.44446e-11	2R	12468240	Cdk4	Cdk4-in	intronic	65	0.408805	15	A	T	T
2R	13026724	CG11395	387	intergenic	63	0.388889	16	G	A	A	0.50753	42.3986	7.44446e-11	2R	12468240	Cdk4	Cdk4-in	intronic	65	0.408805	15	A	T	T
2R	13352017	CG14478	CG14478-u3	UTR	66	0.402439	14	A	C	A	-0.51032	42.3976	7.44822e-11	3R	26178818	hdc	hdc-in	intronic	58	0.36478	12	G	T	T
3L	18147274	CG13699	-719	intergenic	38	0.242038	11	T	G	T	0.64905	42.3645	7.57512e-11	2L	1662057	chinmo	chinmo-in	intronic	8	0.0629921	9	G	T	G
3L	18147274	CG7330	550	intergenic	38	0.242038	11	T	G	T	0.64905	42.3645	7.57512e-11	2L	1662057	chinmo	chinmo-in	intronic	8	0.0629921	9	G	T	G
2R	8303276	CG13157	-684	intergenic	54	0.335404	21	T	A	T	-0.51859	42.3583	7.59929e-11	2L	10327106	RnrL	RnrL-PA	synonymous	78	0.484472	21	C	T	C
2R	8303276	Cpr49Ah	601	intergenic	54	0.335404	21	T	A	T	-0.51859	42.3583	7.59929e-11	2L	10327106	RnrL	RnrL-PA	synonymous	78	0.484472	21	C	T	C
3L	19029915	nkd	nkd-in	intronic	36	0.230769	13	T	G	T	0.60831	42.2777	7.91912e-11	3R	25289439	Ptp99A	Ptp99A-in	intronic	67	0.41358	14	T	C	T
2L	6200226	CG34380	CG34380-in	intronic	44	0.27673	11	T	A	T	0.6213	42.235	8.09371e-11	2L	20790735	vari	vari-in	intronic	34	0.216561	20	G	A	G
X	8531701	oc	oc-in	intronic	72	0.439024	14	T	G	T	0.54246	42.2289	8.11892e-11	X	18438113	Bx	Bx-in	intronic	57	0.345455	7	T	A	A
3R	16521221	Oamb	Oamb-in	intronic	49	0.308176	12	C	A	C	-0.62494	42.1869	8.29541e-11	2R	6706798	dgo	dgo-u5	UTR	46	0.282209	13	G	A	G
X	4417201	CG3556	-7063	intergenic	76	0.463415	10	A	G	G	-0.49788	42.1442	8.47842e-11	X	4329519	bi	bi-in	intronic	66	0.39521	11	G	A	A
X	4417201	bi	38716	intergenic	76	0.463415	10	A	G	G	-0.49788	42.1442	8.47842e-11	X	4329519	bi	bi-in	intronic	66	0.39521	11	G	A	A
3R	21018939	CG13653	-2343	intergenic	22	0.131737	20	G	A	A	-0.693	42.1315	8.53396e-11	3R	11866039	pnr	pnr-u3	UTR	60	0.379747	20	A	T	A
3R	21018939	dan	411	intergenic	22	0.131737	20	G	A	A	-0.693	42.1315	8.53396e-11	3R	11866039	pnr	pnr-u3	UTR	60	0.379747	20	A	T	A
3R	21018939	CG34110	CG34110-in	intronic	22	0.131737	20	G	A	A	-0.693	42.1315	8.53396e-11	3R	11866039	pnr	pnr-u3	UTR	60	0.379747	20	A	T	A
X	10122045	CG34408	CG34408-in	intronic	52	0.315152	14	T	A	A	-0.63854	42.0977	8.6824e-11	2R	9904488	mam	mam-in	intronic	53	0.329193	12	T	A	A
2L	2882693	NTPase	NTPase-u5	missense	77	0.48125	19	G	A	A	0.49886	42.0696	8.80837e-11	3R	25249904	Ptp99A	Ptp99A-in	intronic	58	0.360248	10	A	G	A
3R	20243274	nAcRalpha-96Aa	nAcRalpha-96Aa-in	intronic	62	0.392405	7	A	T	A	0.56282	42.0288	8.99368e-11	2L	382173	al	al-in	intronic	46	0.283951	16	G	C	G
3L	19021449	nkd	nkd-in	intronic	40	0.25	15	C	A	C	0.63439	42.0284	8.99558e-11	3R	25289439	Ptp99A	Ptp99A-in	intronic	67	0.41358	14	T	C	T
2L	8916792	CG34398	CG34398-in	intronic	31	0.194969	14	A	G	A	-0.60932	41.9861	9.19251e-11	2R	7067502	shn	shn-in	intronic	76	0.475	15	C	T	C
3R	25293430	Ptp99A	Ptp99A-in	intronic	75	0.465839	11	A	T	T	-0.55494	41.9051	9.58149e-11	X	18460247	Bx	Bx-in	intronic	48	0.294479	10	A	C	C
X	18460247	CG15040	-40488	intergenic	48	0.294479	10	A	C	C	-0.55494	41.9051	9.58149e-11	3R	25293430	Ptp99A	Ptp99A-in	intronic	75	0.465839	11	A	T	T
X	18460247	tRNA:CR32546	379	intergenic	48	0.294479	10	A	C	C	-0.55494	41.9051	9.58149e-11	3R	25293430	Ptp99A	Ptp99A-in	intronic	75	0.465839	11	A	T	T
X	18460247	Bx	Bx-in	intronic	48	0.294479	10	A	C	C	-0.55494	41.9051	9.58149e-11	3R	25293430	Ptp99A	Ptp99A-in	intronic	75	0.465839	11	A	T	T
2L	14605910	osp	osp-in	intronic	47	0.303226	13	C	T	C	-0.67523	41.8932	9.63981e-11	2R	2008321	EcR	EcR-in	intronic	35	0.213415	20	G	T	G
X	10122042	CG34408	CG34408-in	intronic	52	0.315152	13	T	G	G	-0.64309	41.8795	9.70773e-11	2R	9904488	mam	mam-in	intronic	53	0.329193	12	T	A	A
3L	8725521	Cp16	Cp16-in		20	0.119048	40	T	G	G	-0.68285	41.8695	9.75723e-11	3L	13230397	caps	caps-in	intronic	43	0.273885	9	G	A	G
2R	14686962	l(2)08717		intronic	40	0.240964	15	G	C	G	0.63167	41.7991	1.01152e-10	2R	14169092	sbb	sbb-in	intronic	36	0.216867	16	T	C	T
3R	14416263	CG14306	-559	intergenic	42	0.265823	19	T	C	T	0.65679	41.7848	1.01891e-10	2R	6595460	stan	stan-cds	synonymous	53	0.329193	16	T	C	T
3R	14416263	CG14306	-559	intergenic	42	0.265823	19	T	C	T	0.65679	41.7848	1.01891e-10	2R	6595453	stan	stan-cds	synonymous	53	0.329193	15	G	A	G
3R	14416263	fray	1088	intergenic	42	0.265823	19	T	C	T	0.65679	41.7848	1.01891e-10	2R	6595460	stan	stan-cds	synonymous	53	0.329193	16	T	C	T
3R	14416263	fray	1088	intergenic	42	0.265823	19	T	C	T	0.65679	41.7848	1.01891e-10	2R	6595453	stan	stan-cds	synonymous	53	0.329193	15	G	A	G
3R	14416263	CG7694	CG7694-cds	synonymous	42	0.265823	19	T	C	T	0.65679	41.7848	1.01891e-10	2R	6595460	stan	stan-cds	synonymous	53	0.329193	16	T	C	T
3R	14416263	CG7694	CG7694-cds	synonymous	42	0.265823	19	T	C	T	0.65679	41.7848	1.01891e-10	2R	6595453	stan	stan-cds	synonymous	53	0.329193	15	G	A	G
2R	13388768	CG43164	-1094	intergenic	53	0.321212	13	A	T	T	0.51038	41.686	1.07174e-10	3L	9638451	fry	fry-in	synonymous	78	0.467066	17	T	G	G
2R	13388768	CG30103	5264	intergenic	53	0.321212	13	A	T	T	0.51038	41.686	1.07174e-10	3L	9638451	fry	fry-in	synonymous	78	0.467066	17	T	G	G
X	22092791	CG12446	-118332	intergenic	73	0.439759	11	T	C	T	-0.52185	41.6802	1.07494e-10	2R	18056368	a	a-in	intronic	62	0.3875	18	C	A	C
X	22092791	Cda4	58246	intergenic	73	0.439759	11	T	C	T	-0.52185	41.6802	1.07494e-10	2R	18056368	a	a-in	intronic	62	0.3875	18	C	A	C
2R	19383638	CG13558	-3617	intergenic	52	0.317073	21	A	T	A	0.57658	41.5914	1.12489e-10	3L	16634665	Abl	Abl-in	intronic	34	0.206061	14	T	A	T
2R	19383638	CG13557	19697	intergenic	52	0.317073	21	A	T	A	0.57658	41.5914	1.12489e-10	3L	16634665	Abl	Abl-in	intronic	34	0.206061	14	T	A	T
2R	11483165	CG42524	-18442	intergenic	64	0.387879	14	A	C	C	0.50381	41.5572	1.14473e-10	X	4376329	bi	bi:9	synonymous	71	0.42515	8	C	T	C
2R	11483165	CG8204	21669	intergenic	64	0.387879	14	A	C	C	0.50381	41.5572	1.14473e-10	X	4376329	bi	bi:9	synonymous	71	0.42515	8	C	T	C
2L	15508617	CG42448	-38902	intergenic	22	0.140127	14	C	T	C	0.75607	41.5458	1.15143e-10	3R	17018223	SNF4Agamma	SNF4Agamma-in	intronic	31	0.192547	19	A	T	A
2L	15508617	lace	3599	intergenic	22	0.140127	14	C	T	C	0.75607	41.5458	1.15143e-10	3R	17018223	SNF4Agamma	SNF4Agamma-in	intronic	31	0.192547	19	A	T	A
3L	12789508	Sap130	-9485	intergenic	64	0.385542	19	G	A	G	0.52589	41.523	1.16492e-10	X	2006892	csw	csw-u3	UTR	59	0.353293	16	G	T	G
3L	12789508	CG42709	324	intergenic	64	0.385542	19	G	A	G	0.52589	41.523	1.16492e-10	X	2006892	csw	csw-u3	UTR	59	0.353293	16	G	T	G
3L	12789508	Atg1	Atg1-in	intronic	64	0.385542	19	G	A	G	0.52589	41.523	1.16492e-10	X	2006892	csw	csw-u3	UTR	59	0.353293	16	G	T	G
3L	13045055	CG14115	-8567	intergenic	67	0.403614	18	A	G	A	-0.50659	41.4818	1.18973e-10	2L	681204	ds	ds-in	intronic	77	0.469512	9	T	C	T
3L	13045055	CG14115	-8567	intergenic	67	0.403614	18	A	G	A	-0.50659	41.4818	1.18973e-10	2L	681204	ds	ds-in	intronic	77	0.469512	9	T	C	T
3L	13045055	CG11279	4432	intergenic	67	0.403614	18	A	G	A	-0.50659	41.4818	1.18973e-10	2L	681204	ds	ds-in	intronic	77	0.469512	9	T	C	T
3L	13045055	CG11279	4432	intergenic	67	0.403614	18	A	G	A	-0.50659	41.4818	1.18973e-10	2L	681204	ds	ds-in	intronic	77	0.469512	9	T	C	T
2R	18729139	CG9826	CG9826:2	synonymous	54	0.335404	20	A	G	G	-0.56802	41.4355	1.21822e-10	2R	17433517	Egfr	Egfr-in	intronic	38	0.234568	13	T	C	T
2R	18729139	CG9826	CG9826:2	synonymous	54	0.335404	20	A	G	G	-0.56802	41.4355	1.21822e-10	2R	17433517	Egfr	Egfr-in	intronic	38	0.234568	13	T	C	T
3R	12561916	bxd	-5931	intergenic	60	0.384615	15	T	C	C	-0.50302	41.4061	1.23674e-10	3L	8876191	dally	dally-in	intronic	73	0.439759	13	T	A	T
3R	12561916	Ubx	1568	intergenic	60	0.384615	15	T	C	C	-0.50302	41.4061	1.23674e-10	3L	8876191	dally	dally-in	intronic	73	0.439759	13	T	A	T
3R	24248333	beat-VI	beat-VI-in	intronic	71	0.449367	14	G	C	G	0.53625	41.4008	1.24005e-10	2R	19831480	G-salpha60A	G-salpha60A-in	intronic	48	0.298137	17	C	T	C
3L	5434426	CG4835	-38524	intergenic	64	0.387879	13	A	T	A	0.56005	41.3966	1.24272e-10	2R	18049685	a	a-in	intronic	45	0.272727	14	C	G	C
3L	5434426	CG34391	1283	intergenic	64	0.387879	13	A	T	A	0.56005	41.3966	1.24272e-10	2R	18049685	a	a-in	intronic	45	0.272727	14	C	G	C
X	10122037	CG34408	CG34408-in	intronic	52	0.313253	14	T	A	A	-0.63141	41.3935	1.2447e-10	2R	9904488	mam	mam-in	intronic	53	0.329193	12	T	A	A
2L	14605284	osp	osp-in	intronic	42	0.269231	18	T	C	T	-0.60923	41.3809	1.25277e-10	3L	8838461	dally	dally-in	intronic	61	0.371951	11	C	T	T
3L	18338881	rpr	-51772	intergenic	67	0.421384	6	A	G	G	0.53191	41.362	1.26492e-10	2L	7920746	Snoo	Snoo-in	intronic	67	0.432258	15	A	G	A
3L	18338881	grim	41367	intergenic	67	0.421384	6	A	G	G	0.53191	41.362	1.26492e-10	2L	7920746	Snoo	Snoo-in	intronic	67	0.432258	15	A	G	A
X	5091924	CG42749	-98190	intergenic	61	0.36747	10	C	G	C	-0.7112	41.297	1.30768e-10	3L	14285227	fz	fz-in	intronic	19	0.115854	11	G	A	G
X	5091924	CG15464	10390	intergenic	61	0.36747	10	C	G	C	-0.7112	41.297	1.30768e-10	3L	14285227	fz	fz-in	intronic	19	0.115854	11	G	A	G
X	5091924	rg	rg-in	intronic	61	0.36747	10	C	G	C	-0.7112	41.297	1.30768e-10	3L	14285227	fz	fz-in	intronic	19	0.115854	11	G	A	G
3R	25054596	CG15817	-292	intergenic	43	0.265432	12	A	G	A	-0.68364	41.2929	1.3104e-10	X	18460220	Bx	Bx-in	intronic	47	0.288344	10	A	T	T
3R	25054596	CG14507	1149	intergenic	43	0.265432	12	A	G	A	-0.68364	41.2929	1.3104e-10	X	18460220	Bx	Bx-in	intronic	47	0.288344	10	A	T	T
3R	22925013	eater	eater-in	intronic	43	0.27044	11	G	A	A	-0.57563	41.265	1.32926e-10	2R	18051379	a	a-in	missense	67	0.426752	11	T	C	T
X	1611807	Scgdelta	-28102	intergenic	47	0.311258	12	T	C	T	-0.65655	41.262	1.33132e-10	3L	8442861	Gug	-161	intergenic	26	0.160494	8	T	A	T
X	1611807	CG3795	7611	intergenic	47	0.311258	12	T	C	T	-0.65655	41.262	1.33132e-10	3L	8442861	Gug	-161	intergenic	26	0.160494	8	T	A	T
X	4010590	Tip60	Tip60-in	intronic	75	0.449102	11	A	G	A	-0.49986	41.211	1.36649e-10	2R	9342493	arr	arr-PA	synonymous	77	0.475309	21	G	A	G
3L	2771900	CG9977	CG9977-u5	UTR	73	0.437126	21	C	T	C	-0.4876	41.1544	1.40665e-10	3L	8824578	dally	dally-in	intronic	80	0.487805	19	A	G	A
2R	17977770	CG11073	-1224	intergenic	32	0.198758	10	C	T	C	0.64684	41.1294	1.42479e-10	3L	12582643	ara	ara:3	missense	56	0.341463	10	A	G	A
2R	17977770	CG13502	1686	intergenic	32	0.198758	10	C	T	C	0.64684	41.1294	1.42479e-10	3L	12582643	ara	ara:3	missense	56	0.341463	10	A	G	A
2R	7153023	Cpr47Ee	Cpr47Ee-cds	missense	78	0.481481	14	G	C	G	0.5382	41.1101	1.43887e-10	X	2857072	rst	rst-in	intronic	52	0.315152	13	A	C	A
2R	8208920	CG13163	CG13163-cds	missense	71	0.432927	15	T	A	A	-0.57503	41.1018	1.44507e-10	3R	11858979	pnr	pnr-in	intronic	45	0.272727	16	G	A	A
3L	10288340	mir-276b	-24545	intergenic	64	0.453901	4	T	C	C	-0.53808	41.1005	1.44598e-10	2R	17426927	Egfr	Egfr-in	intronic	42	0.264151	11	C	T	C
3L	10288340	mir-276b	-24545	intergenic	64	0.453901	4	T	C	C	-0.53808	41.1005	1.44598e-10	2R	17426927	Egfr	Egfr-in	intronic	42	0.264151	11	C	T	C
3L	10288340	Or67d	20616	intergenic	64	0.453901	4	T	C	C	-0.53808	41.1005	1.44598e-10	2R	17426927	Egfr	Egfr-in	intronic	42	0.264151	11	C	T	C
3L	10288340	Or67d	20616	intergenic	64	0.453901	4	T	C	C	-0.53808	41.1005	1.44598e-10	2R	17426927	Egfr	Egfr-in	intronic	42	0.264151	11	C	T	C
X	8600401	Hexo2	-3286	intergenic	68	0.43038	7	G	A	A	0.50322	41.0746	1.4653e-10	2R	6595703	stan	stan:5	synonymous	64	0.392638	11	G	A	G
X	8600401	CG11294	12814	intergenic	68	0.43038	7	G	A	A	0.50322	41.0746	1.4653e-10	2R	6595703	stan	stan:5	synonymous	64	0.392638	11	G	A	G
X	4639038	CG15472	-24100	intergenic	42	0.257669	12	G	A	G	-0.59201	41.0475	1.48575e-10	3R	27730004	heph	heph-in	intronic	40	0.253165	13	T	A	T
X	4639038	Proc-R	15511	intergenic	42	0.257669	12	G	A	G	-0.59201	41.0475	1.48575e-10	3R	27730004	heph	heph-in	intronic	40	0.253165	13	T	A	T
3L	18338931	rpr	-51722	intergenic	71	0.440994	7	A	C	C	0.51802	41.0042	1.51906e-10	2L	7920746	Snoo	Snoo-in	intronic	67	0.432258	15	A	G	A
3L	18338931	grim	41417	intergenic	71	0.440994	7	A	C	C	0.51802	41.0042	1.51906e-10	2L	7920746	Snoo	Snoo-in	intronic	67	0.432258	15	A	G	A
3R	21021784	CG13653	CG13653:2	synonymous	63	0.396226	20	C	A	C	0.52226	40.9808	1.53733e-10	3L	9633297	fry	fry-in	intronic	64	0.390244	8	C	T	C
X	10810416	CG11203	CG11203:6	synonymous	33	0.20122	14	C	T	C	0.65875	40.9749	1.54198e-10	2R	13720313	grh	grh-u5	UTR	36	0.222222	16	G	T	G
X	5925033	rux	-4753	intergenic	36	0.215569	12	G	T	G	-0.61302	40.9421	1.56803e-10	2L	7911178	Snoo	Snoo-in	intronic	54	0.343949	9	A	G	G
X	5925033	mab-21	17822	intergenic	36	0.215569	12	G	T	G	-0.61302	40.9421	1.56803e-10	2L	7911178	Snoo	Snoo-in	intronic	54	0.343949	9	A	G	G
2R	19308906	CG9815	-125	intergenic	74	0.45679	10	A	T	A	0.64414	40.9323	1.57597e-10	3L	8857741	dally	dally-in	intronic	26	0.158537	14	T	C	C
2R	19308906	CG30411	4145	intergenic	74	0.45679	10	A	T	A	0.64414	40.9323	1.57597e-10	3L	8857741	dally	dally-in	intronic	26	0.158537	14	T	C	C
3L	17414818	sec3	-69	intergenic	52	0.317073	11	A	G	A	0.69148	40.9322	1.57603e-10	3R	26150665	hdc	hdc-in	intronic	28	0.17284	8	T	A	A
3L	17414818	noe	20370	intergenic	52	0.317073	11	A	G	A	0.69148	40.9322	1.57603e-10	3R	26150665	hdc	hdc-in	intronic	28	0.17284	8	T	A	A
2R	19383638	CG13558	-3617	intergenic	52	0.317073	21	A	T	A	0.6174	40.8919	1.60888e-10	3L	16638078	Abl	Abl-in	intronic	26	0.168831	13	T	C	T
2R	19383638	CG13557	19697	intergenic	52	0.317073	21	A	T	A	0.6174	40.8919	1.60888e-10	3L	16638078	Abl	Abl-in	intronic	26	0.168831	13	T	C	T
3R	23622786	CG34353	CG34353-in	intronic	59	0.36875	14	T	C	T	0.74387	40.8748	1.62297e-10	2R	13724833	grh	grh-in	intronic	14	0.0843373	16	T	A	T
3R	25054603	CG15817	-285	intergenic	43	0.265432	12	A	G	A	-0.67776	40.8604	1.635e-10	X	18460220	Bx	Bx-in	intronic	47	0.288344	10	A	T	T
3R	25054606	CG15817	-282	intergenic	44	0.269939	11	A	G	A	-0.67776	40.8604	1.635e-10	X	18460220	Bx	Bx-in	intronic	47	0.288344	10	A	T	T
3R	25054603	CG14507	1156	intergenic	43	0.265432	12	A	G	A	-0.67776	40.8604	1.635e-10	X	18460220	Bx	Bx-in	intronic	47	0.288344	10	A	T	T
3R	25054606	CG14507	1159	intergenic	44	0.269939	11	A	G	A	-0.67776	40.8604	1.635e-10	X	18460220	Bx	Bx-in	intronic	47	0.288344	10	A	T	T
3L	10288193	mir-276b	-24692	intergenic	59	0.393333	6	T	G	G	-0.53064	40.8388	1.65314e-10	2R	17426927	Egfr	Egfr-in	intronic	42	0.264151	11	C	T	C
3L	10288193	mir-276b	-24692	intergenic	59	0.393333	6	T	G	G	-0.53064	40.8388	1.65314e-10	2R	17426927	Egfr	Egfr-in	intronic	42	0.264151	11	C	T	C
3L	10288193	Or67d	20469	intergenic	59	0.393333	6	T	G	G	-0.53064	40.8388	1.65314e-10	2R	17426927	Egfr	Egfr-in	intronic	42	0.264151	11	C	T	C
3L	10288193	Or67d	20469	intergenic	59	0.393333	6	T	G	G	-0.53064	40.8388	1.65314e-10	2R	17426927	Egfr	Egfr-in	intronic	42	0.264151	11	C	T	C
2R	11402433	GalNAc-T1	GalNAc-T1-cds	synonymous	40	0.242424	18	C	G	C	0.70116	40.8375	1.65428e-10	3R	26127115	hdc	hdc-in	intronic	42	0.256098	13	G	T	T
2L	20563894	CG31677	-39695	intergenic	61	0.378882	17	A	T	A	0.60657	40.8189	1.67013e-10	2R	10464494	ttv	ttv-in	intronic	43	0.265432	17	A	C	A
2L	20563894	CG34007	68446	intergenic	61	0.378882	17	A	T	A	0.60657	40.8189	1.67013e-10	2R	10464494	ttv	ttv-in	intronic	43	0.265432	17	A	C	A
3L	7435887	CG33278	-8066	intergenic	26	0.155689	14	A	T	A	-0.6601	40.8173	1.67145e-10	3R	25260422	Ptp99A	Ptp99A-in	intronic	79	0.49375	15	G	A	G
3L	7435887	sphinx2	2054	intergenic	26	0.155689	14	A	T	A	-0.6601	40.8173	1.67145e-10	3R	25260422	Ptp99A	Ptp99A-in	intronic	79	0.49375	15	G	A	G
3L	7435887	CG42458	CG42458-in	intergenic	26	0.155689	14	A	T	A	-0.6601	40.8173	1.67145e-10	3R	25260422	Ptp99A	Ptp99A-in	intronic	79	0.49375	15	G	A	G
2R	9972539	Prosap	Prosap-in	intronic	67	0.41358	11	G	A	A	0.52297	40.8133	1.67486e-10	2L	2171225	aop	aop-in	intronic	47	0.297468	11	T	A	T
2L	2818683	Duox	Duox:3	missense	41	0.254658	12	T	C	C	-0.54591	40.7895	1.69539e-10	2R	9839779	AGO1	AGO1-in	intronic	47	0.286585	10	A	T	A
2L	9547001	CG13114	CG13114-PB	missense	46	0.285714	16	A	G	G	0.66448	40.7876	1.69703e-10	2L	4091406	ed	ed-in	intronic	27	0.176471	5	C	T	C
2L	9547001	CG13114	CG13114-PB	missense	46	0.285714	16	A	G	G	0.66448	40.7876	1.69703e-10	2L	4091406	ed	ed-in	intronic	27	0.176471	5	C	T	C
2L	9111599	Or30a	-215	intergenic	49	0.312102	13	T	A	T	-0.6766	40.7509	1.7292e-10	3R	15131126	Dl	Dl-PC	synonymous	39	0.24375	14	C	T	C
2L	9111599	CG31609	13423	intergenic	49	0.312102	13	T	A	T	-0.6766	40.7509	1.7292e-10	3R	15131126	Dl	Dl-PC	synonymous	39	0.24375	14	C	T	C
3R	17253401	lbl	lbl-in	intronic	56	0.347826	16	G	A	G	0.57574	40.7437	1.73564e-10	X	7526491	ct	ct-in	intronic	46	0.2875	8	T	C	T
X	8051175	Traf6	Traf6-PA	synonymous	65	0.393939	13	C	A	C	-0.5164	40.7423	1.73688e-10	2L	14396850	elB	elB-in	intronic	65	0.414013	13	C	A	C
3R	26386600	CG9702	-18551	intergenic	20	0.128205	7	G	A	G	-0.74749	40.7396	1.7393e-10	2R	9946771	mam	mam-u3	UTR	66	0.404908	17	T	A	T
3R	26386600	CG34155	679	intergenic	20	0.128205	7	G	A	G	-0.74749	40.7396	1.7393e-10	2R	9946771	mam	mam-u3	UTR	66	0.404908	17	T	A	T
3R	26386600	tmod	tmod-in	intronic	20	0.128205	7	G	A	G	-0.74749	40.7396	1.7393e-10	2R	9946771	mam	mam-u3	UTR	66	0.404908	17	T	A	T
2R	9997192	mir-989	-35664	intergenic	63	0.409091	4	G	T	T	0.59551	40.7287	1.74903e-10	3L	2746068	Mrtf	Mrtf-in	intronic	51	0.307229	16	G	T	G
2R	9997192	CG42288	17882	intergenic	63	0.409091	4	G	T	T	0.59551	40.7287	1.74903e-10	3L	2746068	Mrtf	Mrtf-in	intronic	51	0.307229	16	G	T	G
2R	9997192	Prosap	Prosap-in	intronic	63	0.409091	4	G	T	T	0.59551	40.7287	1.74903e-10	3L	2746068	Mrtf	Mrtf-in	intronic	51	0.307229	16	G	T	G
2R	5907007	Pka-R2	171638-171639-AE003831.4-dummy-promoter	intronic	24	0.149068	10	C	T	T	0.70166	40.7182	1.75846e-10	2L	1690465	chinmo	chinmo-u5	UTR	46	0.283951	15	T	C	T
3L	19018321	nkd	nkd-in	intronic	62	0.382716	9	T	A	A	0.55108	40.7167	1.75975e-10	3R	25289439	Ptp99A	Ptp99A-in	intronic	67	0.41358	14	T	C	T
X	12717098	CG4661	-32623	intergenic	40	0.246914	6	T	A	T	-0.55597	40.7073	1.76828e-10	2L	2367820	Axud1	Axud1-cds	synonymous	62	0.389937	15	T	C	C
X	12717098	CG3775	18833	intergenic	40	0.246914	6	T	A	T	-0.55597	40.7073	1.76828e-10	2L	2367820	Axud1	Axud1-cds	synonymous	62	0.389937	15	T	C	C
X	12717098	Pde9	Pde9-in	intronic	40	0.246914	6	T	A	T	-0.55597	40.7073	1.76828e-10	2L	2367820	Axud1	Axud1-cds	synonymous	62	0.389937	15	T	C	C
X	6120332	CG14446	CG14446-in	intronic	72	0.436364	12	G	T	T	0.56516	40.6906	1.78347e-10	2L	11230715	ab	ab-in	intronic	40	0.258065	7	T	A	T
3R	25054596	CG15817	-292	intergenic	43	0.265432	12	A	G	A	-0.67909	40.6407	1.82954e-10	X	18460246	Bx	Bx-in	intronic	47	0.290123	9	A	G	G
3R	25054596	CG14507	1149	intergenic	43	0.265432	12	A	G	A	-0.67909	40.6407	1.82954e-10	X	18460246	Bx	Bx-in	intronic	47	0.290123	9	A	G	G
2L	7262815	wg	-44346	intergenic	36	0.222222	12	G	A	G	0.61976	40.6205	1.84861e-10	3R	26128042	hdc	hdc-in	intronic	50	0.3125	14	T	C	T
2L	7262815	CG31909	4610	intergenic	36	0.222222	12	G	A	G	0.61976	40.6205	1.84861e-10	3R	26128042	hdc	hdc-in	intronic	50	0.3125	14	T	C	T
2L	7262815	Wnt4	Wnt4-in	intronic	36	0.222222	12	G	A	G	0.61976	40.6205	1.84861e-10	3R	26128042	hdc	hdc-in	intronic	50	0.3125	14	T	C	T
3R	19177650	DNApol-epsilon	DNApol-epsilon:3	synonymous	52	0.329114	17	C	T	C	-0.60828	40.6046	1.86368e-10	3L	8876455	dally	dally-in	intronic	37	0.221557	14	C	T	T
2L	6889520	neuroligin	-7310	intergenic	41	0.251534	19	C	T	C	0.6375	40.5834	1.88399e-10	2L	10837666	Nos	Nos-in	intronic	38	0.236025	17	G	A	G
2L	6889520	Nha1	19133	intergenic	41	0.251534	19	C	T	C	0.6375	40.5834	1.88399e-10	2L	10837666	Nos	Nos-in	intronic	38	0.236025	17	G	A	G
2R	7681288	CG13192	-31582	intergenic	55	0.335366	18	A	C	C	0.51441	40.5815	1.88587e-10	2R	16722877	insc	insc-in	intronic	67	0.408537	19	G	A	G
2R	7681288	Tango3	4290	intergenic	55	0.335366	18	A	C	C	0.51441	40.5815	1.88587e-10	2R	16722877	insc	insc-in	intronic	67	0.408537	19	G	A	G
2R	7681288	ths	ths-in	intronic	55	0.335366	18	A	C	C	0.51441	40.5815	1.88587e-10	2R	16722877	insc	insc-in	intronic	67	0.408537	19	G	A	G
X	16934242	CG43077	-27095	intergenic	43	0.259036	12	C	A	A	-0.53016	40.5748	1.89228e-10	3L	8004453	nmo	nmo-in	intronic	73	0.447853	13	T	A	T
X	16934242	CG34326	7674	intergenic	43	0.259036	12	C	A	A	-0.53016	40.5748	1.89228e-10	3L	8004453	nmo	nmo-in	intronic	73	0.447853	13	T	A	T
3R	25054596	CG15817	-292	intergenic	43	0.265432	12	A	G	A	-0.68433	40.5575	1.90909e-10	X	18460257	Bx	Bx-in	intronic	48	0.296296	10	T	A	A
3R	25054596	CG14507	1149	intergenic	43	0.265432	12	A	G	A	-0.68433	40.5575	1.90909e-10	X	18460257	Bx	Bx-in	intronic	48	0.296296	10	T	A	A
2R	12817582	Pkc53E	Pkc53E-in	intronic	63	0.381818	14	A	G	A	-0.52064	40.4875	1.97882e-10	2L	1063913	S	S-in	intronic	74	0.4625	12	C	T	C
X	18732449	Pvf1	Pvf1-in	intronic	19	0.114458	7	G	T	G	-0.74061	40.4849	1.9814e-10	3R	26158011	hdc	hdc-in	intronic	75	0.496689	12	T	C	T
2R	9480782	CG6191	CG6191-u5	UTR	41	0.253086	23	A	C	A	0.76809	40.4766	1.98984e-10	2R	13724833	grh	grh-in	intronic	14	0.0843373	16	T	A	T
3L	10483384	A2bp1	A2bp1-in	intergenic	20	0.133333	7	A	T	A	0.73773	40.452	2.01509e-10	3R	23005511	Ser	Ser:7	synonymous	52	0.322981	16	A	C	A
2L	5637661	CG31646	CG31646-in	intronic	55	0.348101	17	C	T	T	0.53276	40.3658	2.10591e-10	2L	4377128	Traf4	Traf4-in	intronic	44	0.27673	14	A	G	G
3L	19386275	CR32205	-29663	intergenic	26	0.158537	10	T	C	C	-0.6869	40.3399	2.13407e-10	3R	11925229	Akt1	Akt1-u5	UTR	69	0.428571	20	T	G	G
3L	19386275	CG14087	3142	intergenic	26	0.158537	10	T	C	C	-0.6869	40.3399	2.13407e-10	3R	11925229	Akt1	Akt1-u5	UTR	69	0.428571	20	T	G	G
3L	19386275	CG32206	CG32206-in	intronic	26	0.158537	10	T	C	C	-0.6869	40.3399	2.13407e-10	3R	11925229	Akt1	Akt1-u5	UTR	69	0.428571	20	T	G	G
2L	4252792	CG15425	-4780	intergenic	65	0.398773	22	G	A	A	-0.47581	40.3257	2.14966e-10	3R	9895681	foxo	foxo-in	intronic	67	0.424051	15	T	A	T
2L	4252792	RpL40	24229	intergenic	65	0.398773	22	G	A	A	-0.47581	40.3257	2.14966e-10	3R	9895681	foxo	foxo-in	intronic	67	0.424051	15	T	A	T
3L	978950	Glut1	Glut1-in	intronic	78	0.464286	17	A	G	A	0.52535	40.3182	2.15795e-10	X	18460111	Bx	Bx-in	intronic	46	0.275449	12	T	A	A
3R	14784047	CG42613	CG42613-in	intergenic	40	0.243902	17	A	C	A	-0.60698	40.3141	2.16243e-10	2R	9363166	arr	arr-in	intronic	14	0.112903	5	G	A	G
2L	9758224	zf30C	-114	intergenic	47	0.290123	12	G	T	T	-0.72787	40.2972	2.18122e-10	2R	13724833	grh	grh-in	intronic	14	0.0843373	16	T	A	T
2L	9758224	Cyp4e3	8153	intergenic	47	0.290123	12	G	T	T	-0.72787	40.2972	2.18122e-10	2R	13724833	grh	grh-in	intronic	14	0.0843373	16	T	A	T
3R	22201410	CG14239	-26221	intergenic	57	0.363057	9	A	G	A	-0.58799	40.2688	2.21314e-10	X	18460220	Bx	Bx-in	intronic	47	0.288344	10	A	T	T
3R	22201410	CG6036	30215	intergenic	57	0.363057	9	A	G	A	-0.58799	40.2688	2.21314e-10	X	18460220	Bx	Bx-in	intronic	47	0.288344	10	A	T	T
X	6450285	CG34417	CG34417:8	missense	66	0.39759	13	T	C	C	0.56233	40.2656	2.21681e-10	2L	1060582	S	S-in	intronic	41	0.254658	12	A	G	A
3L	10288340	mir-276b	-24545	intergenic	64	0.453901	4	T	C	C	-0.54189	40.2493	2.23534e-10	2R	17426933	Egfr	Egfr-in	intronic	44	0.271605	11	T	C	T
3L	10288340	mir-276b	-24545	intergenic	64	0.453901	4	T	C	C	-0.54189	40.2493	2.23534e-10	2R	17426933	Egfr	Egfr-in	intronic	44	0.271605	11	T	C	T
3L	10288340	Or67d	20616	intergenic	64	0.453901	4	T	C	C	-0.54189	40.2493	2.23534e-10	2R	17426933	Egfr	Egfr-in	intronic	44	0.271605	11	T	C	T
3L	10288340	Or67d	20616	intergenic	64	0.453901	4	T	C	C	-0.54189	40.2493	2.23534e-10	2R	17426933	Egfr	Egfr-in	intronic	44	0.271605	11	T	C	T
3R	26386600	CG9702	-18551	intergenic	20	0.128205	7	G	A	G	-0.74821	40.2056	2.28587e-10	2R	9946712	mam	mam-u3	UTR	67	0.406061	14	A	C	A
3R	26386600	CG34155	679	intergenic	20	0.128205	7	G	A	G	-0.74821	40.2056	2.28587e-10	2R	9946712	mam	mam-u3	UTR	67	0.406061	14	A	C	A
3R	26386600	tmod	tmod-in	intronic	20	0.128205	7	G	A	G	-0.74821	40.2056	2.28587e-10	2R	9946712	mam	mam-u3	UTR	67	0.406061	14	A	C	A
3R	25054603	CG15817	-285	intergenic	43	0.265432	12	A	G	A	-0.67329	40.2046	2.28711e-10	X	18460246	Bx	Bx-in	intronic	47	0.290123	9	A	G	G
3R	25054606	CG15817	-282	intergenic	44	0.269939	11	A	G	A	-0.67329	40.2046	2.28711e-10	X	18460246	Bx	Bx-in	intronic	47	0.290123	9	A	G	G
3R	25054603	CG14507	1156	intergenic	43	0.265432	12	A	G	A	-0.67329	40.2046	2.28711e-10	X	18460246	Bx	Bx-in	intronic	47	0.290123	9	A	G	G
3R	25054606	CG14507	1159	intergenic	44	0.269939	11	A	G	A	-0.67329	40.2046	2.28711e-10	X	18460246	Bx	Bx-in	intronic	47	0.290123	9	A	G	G
3R	22201410	CG14239	-26221	intergenic	57	0.363057	9	A	G	A	-0.59264	40.1686	2.32959e-10	X	18460257	Bx	Bx-in	intronic	48	0.296296	10	T	A	A
3R	22201410	CG6036	30215	intergenic	57	0.363057	9	A	G	A	-0.59264	40.1686	2.32959e-10	X	18460257	Bx	Bx-in	intronic	48	0.296296	10	T	A	A
X	6450280	CG34417	CG34417:8	missense	60	0.361446	16	A	G	G	0.57597	40.1632	2.33608e-10	2L	1060582	S	S-in	intronic	41	0.254658	12	A	G	A
3L	6386632	CG42747	-7060	intergenic	62	0.378049	20	G	A	G	0.57914	40.1596	2.3404e-10	2R	18154400	dve	dve-in	intronic	36	0.225	11	C	T	C
3L	6386632	Sfp65A	42703	intergenic	62	0.378049	20	G	A	G	0.57914	40.1596	2.3404e-10	2R	18154400	dve	dve-in	intronic	36	0.225	11	C	T	C
3L	13045053	CG14115	-8569	intergenic	66	0.4	18	A	G	A	-0.50824	40.1448	2.3582e-10	2L	681204	ds	ds-in	intronic	77	0.469512	9	T	C	T
3L	13045053	CG14115	-8569	intergenic	66	0.4	18	A	G	A	-0.50824	40.1448	2.3582e-10	2L	681204	ds	ds-in	intronic	77	0.469512	9	T	C	T
3L	13045053	CG11279	4430	intergenic	66	0.4	18	A	G	A	-0.50824	40.1448	2.3582e-10	2L	681204	ds	ds-in	intronic	77	0.469512	9	T	C	T
3L	13045053	CG11279	4430	intergenic	66	0.4	18	A	G	A	-0.50824	40.1448	2.3582e-10	2L	681204	ds	ds-in	intronic	77	0.469512	9	T	C	T
2R	9307128	CG42321	CG42321:8	synonymous	26	0.158537	22	C	T	C	-0.67198	40.1146	2.39492e-10	3L	7975837	nmo	nmo-in	intronic	47	0.29375	14	C	T	C
3R	22301478	CG6490	CG6490:6	missense	73	0.464968	20	A	G	G	-0.4846	40.1106	2.39986e-10	3R	18953585	hh	hh-u3	UTR	71	0.446541	18	C	T	T
2R	10324482	Oaz	Oaz-in	intergenic	35	0.213415	13	T	C	T	-0.62208	40.1071	2.40407e-10	3L	8556534	rhea	rhea-in	intronic	82	0.49697	9	G	A	G
3R	25054603	CG15817	-285	intergenic	43	0.265432	12	A	G	A	-0.67804	40.1025	2.40982e-10	X	18460257	Bx	Bx-in	intronic	48	0.296296	10	T	A	A
3R	25054606	CG15817	-282	intergenic	44	0.269939	11	A	G	A	-0.67804	40.1025	2.40982e-10	X	18460257	Bx	Bx-in	intronic	48	0.296296	10	T	A	A
3R	25054603	CG14507	1156	intergenic	43	0.265432	12	A	G	A	-0.67804	40.1025	2.40982e-10	X	18460257	Bx	Bx-in	intronic	48	0.296296	10	T	A	A
3R	25054606	CG14507	1159	intergenic	44	0.269939	11	A	G	A	-0.67804	40.1025	2.40982e-10	X	18460257	Bx	Bx-in	intronic	48	0.296296	10	T	A	A
2L	15508617	CG42448	-38902	intergenic	22	0.140127	14	C	T	C	0.71038	40.0911	2.42388e-10	2R	6401930	lola	lola-in	intronic	45	0.27439	13	G	A	G
2L	15508617	CG42448	-38902	intergenic	22	0.140127	14	C	T	C	0.71038	40.0911	2.42388e-10	2R	6401930	lola	lola-in	intronic	45	0.27439	13	G	A	G
2L	15508617	lace	3599	intergenic	22	0.140127	14	C	T	C	0.71038	40.0911	2.42388e-10	2R	6401930	lola	lola-in	intronic	45	0.27439	13	G	A	G
2L	15508617	lace	3599	intergenic	22	0.140127	14	C	T	C	0.71038	40.0911	2.42388e-10	2R	6401930	lola	lola-in	intronic	45	0.27439	13	G	A	G
X	14660569	CG5334	-8823	intergenic	34	0.203593	11	C	T	C	0.67508	40.0746	2.44446e-10	2R	13697530	grh	grh-in	intronic	47	0.288344	14	C	T	C
X	14660569	CG15890	749	intergenic	34	0.203593	11	C	T	C	0.67508	40.0746	2.44446e-10	2R	13697530	grh	grh-in	intronic	47	0.288344	14	C	T	C
2R	9831469	AGO1	AGO1-u3	intergenic	41	0.254658	8	G	C	G	0.55439	40.0428	2.48463e-10	2R	6429665	lola	lola-in	intronic	62	0.397436	16	G	T	G
2R	9831469	AGO1	AGO1-u3	intergenic	41	0.254658	8	G	C	G	0.55439	40.0428	2.48463e-10	2R	6429665	lola	lola-in	intronic	62	0.397436	16	G	T	G
X	12392739	CG42251	-20273	intergenic	77	0.478261	8	C	A	C	-0.67614	40.0396	2.48865e-10	3R	6450794	hth	hth-in	intronic	18	0.111111	13	C	T	T
X	12392739	snoRNA:Me18S-G894	898	intergenic	77	0.478261	8	C	A	C	-0.67614	40.0396	2.48865e-10	3R	6450794	hth	hth-in	intronic	18	0.111111	13	C	T	T
X	12392739	CG2556	CG2556-in	intronic	77	0.478261	8	C	A	C	-0.67614	40.0396	2.48865e-10	3R	6450794	hth	hth-in	intronic	18	0.111111	13	C	T	T
X	21364591	Cyp6t1	-23870	intergenic	33	0.197605	9	T	A	A	-0.6712	40.0295	2.5016e-10	2R	9920753	mam	mam-in	intronic	54	0.364865	11	T	A	A
X	21364591	Ir20a	14619	intergenic	33	0.197605	9	T	A	A	-0.6712	40.0295	2.5016e-10	2R	9920753	mam	mam-in	intronic	54	0.364865	11	T	A	A
3L	10288193	mir-276b	-24692	intergenic	59	0.393333	6	T	G	G	-0.52817	40.0136	2.52201e-10	2R	17426933	Egfr	Egfr-in	intronic	44	0.271605	11	T	C	T
3L	10288193	mir-276b	-24692	intergenic	59	0.393333	6	T	G	G	-0.52817	40.0136	2.52201e-10	2R	17426933	Egfr	Egfr-in	intronic	44	0.271605	11	T	C	T
3L	10288193	Or67d	20469	intergenic	59	0.393333	6	T	G	G	-0.52817	40.0136	2.52201e-10	2R	17426933	Egfr	Egfr-in	intronic	44	0.271605	11	T	C	T
3L	10288193	Or67d	20469	intergenic	59	0.393333	6	T	G	G	-0.52817	40.0136	2.52201e-10	2R	17426933	Egfr	Egfr-in	intronic	44	0.271605	11	T	C	T
3L	18446555	CG32196	-6014	intergenic	38	0.242038	10	G	T	G	-0.65721	39.9847	2.55955e-10	2R	7369368	inv	inv-in	intronic	32	0.195122	11	A	T	A
3L	18446555	skl	13518	intergenic	38	0.242038	10	G	T	G	-0.65721	39.9847	2.55955e-10	2R	7369368	inv	inv-in	intronic	32	0.195122	11	A	T	A
3L	5686473	sif	sif-in	intronic	62	0.375758	15	C	A	C	0.6174	39.9672	2.58256e-10	2R	18047894	a	a-in	intronic	31	0.189024	15	A	C	A
2R	4899220	CG8172	CG8172-cds	synonymous	47	0.291925	13	T	A	T	0.54281	39.9593	2.59304e-10	2R	9765984	shot	shot:19	missense	64	0.392638	19	G	A	G
2R	19383640	CG13558	-3615	intergenic	52	0.317073	21	T	C	T	0.62434	39.9532	2.60116e-10	3L	16638078	Abl	Abl-in	intronic	26	0.168831	13	T	C	T
2R	19383640	CG13557	19699	intergenic	52	0.317073	21	T	C	T	0.62434	39.9532	2.60116e-10	3L	16638078	Abl	Abl-in	intronic	26	0.168831	13	T	C	T
X	19506018	Shawn	Shawn-in	intronic	37	0.222892	12	T	G	T	-0.67222	39.9422	2.6159e-10	3L	9038614	Doc1	470	intergenic	28	0.170732	18	A	T	A
X	19506018	Tyler	Tyler-in	intronic	37	0.222892	12	T	G	T	-0.67222	39.9422	2.6159e-10	3L	9038614	Doc1	470	intergenic	28	0.170732	18	A	T	A
X	18732449	Pvf1	Pvf1-in	intronic	19	0.114458	7	G	T	G	0.70946	39.9372	2.62265e-10	X	21931954	S6kII	S6kII-u5	UTR	80	0.487805	9	G	C	G
X	5442496	Vsx2	Vsx2-in	intronic	66	0.402439	15	G	A	G	-0.55654	39.9339	2.62709e-10	2L	3937381	fred	fred-in	intronic	41	0.253086	9	C	A	C
2R	19383640	CG13558	-3615	intergenic	52	0.317073	21	T	C	T	0.57835	39.9306	2.63145e-10	3L	16634665	Abl	Abl-in	intronic	34	0.206061	14	T	A	T
2R	19383640	CG13557	19699	intergenic	52	0.317073	21	T	C	T	0.57835	39.9306	2.63145e-10	3L	16634665	Abl	Abl-in	intronic	34	0.206061	14	T	A	T
2R	8340174	Lac	-522	intergenic	21	0.133758	8	A	C	A	-0.77197	39.9149	2.65269e-10	3L	7997180	nmo	nmo-in	RNA	72	0.431138	14	C	G	G
2R	8340174	CG30334	11396	intergenic	21	0.133758	8	A	C	A	-0.77197	39.9149	2.65269e-10	3L	7997180	nmo	nmo-in	RNA	72	0.431138	14	C	G	G
2R	8340174	Dyb	Dyb-u3	UTR	21	0.133758	8	A	C	A	-0.77197	39.9149	2.65269e-10	3L	7997180	nmo	nmo-in	RNA	72	0.431138	14	C	G	G
3R	22201386	CG14239	-26245	intergenic	55	0.352564	8	C	G	C	-0.58186	39.8893	2.68778e-10	X	18460257	Bx	Bx-in	intronic	48	0.296296	10	T	A	A
3R	22201386	CG6036	30191	intergenic	55	0.352564	8	C	G	C	-0.58186	39.8893	2.68778e-10	X	18460257	Bx	Bx-in	intronic	48	0.296296	10	T	A	A
3R	18191542	CG5382	CG5382-u5	UTR	59	0.36875	18	G	A	A	0.61892	39.8888	2.68838e-10	3L	14350320	fz	fz-in	intronic	41	0.248485	21	G	A	A
3R	26256935	CG15533	CG15533-cds	missense	70	0.434783	17	T	G	G	-0.56301	39.8785	2.70265e-10	3L	8027626	nmo	nmo-in	intronic	41	0.253086	6	C	G	G
3R	11352085	CG31296	-4117	intergenic	73	0.450617	12	T	G	G	0.53384	39.8774	2.70419e-10	2R	6397616	lola	lola:14	missense	51	0.310976	20	C	T	C
3R	11352085	CG31296	-4117	intergenic	73	0.450617	12	T	G	G	0.53384	39.8774	2.70419e-10	2R	6397616	lola	lola:14	missense	51	0.310976	20	C	T	C
3R	11352085	CG14872	16723	intergenic	73	0.450617	12	T	G	G	0.53384	39.8774	2.70419e-10	2R	6397616	lola	lola:14	missense	51	0.310976	20	C	T	C
3R	11352085	CG14872	16723	intergenic	73	0.450617	12	T	G	G	0.53384	39.8774	2.70419e-10	2R	6397616	lola	lola:14	missense	51	0.310976	20	C	T	C
2R	13352017	CG14478	CG14478-u3	UTR	66	0.402439	14	A	C	A	-0.49825	39.862	2.72554e-10	3R	26178813	hdc	hdc-in	intronic	58	0.360248	11	G	A	A
2L	14605910	osp	osp-in	intronic	47	0.303226	13	C	T	C	-0.6689	39.858	2.73106e-10	3L	7996714	nmo	nmo-in	RNA	37	0.22561	16	C	T	C
3L	5354162	CG4769	CG4769-in	intronic	51	0.305389	10	C	T	C	0.5208	39.837	2.76066e-10	X	13308521	Set2	Set2-cds	missense	66	0.402439	10	G	A	G
3R	12356243	CG42342	CG42342-in	intronic	66	0.420382	16	C	T	C	-0.61505	39.8343	2.76446e-10	2L	7423130	chm	741	intergenic	35	0.213415	12	A	T	A
2R	13741807	CG14490	-6497	intergenic	41	0.254658	12	A	T	A	-0.58255	39.8177	2.78802e-10	2L	660188	ds	ds-in	intronic	73	0.459119	19	A	G	G
2R	13741807	CG14490	-6497	intergenic	41	0.254658	12	A	T	A	-0.58255	39.8177	2.78802e-10	2L	660188	ds	ds-in	intronic	73	0.459119	19	A	G	G
2R	13741807	CG30323	41	intergenic	41	0.254658	12	A	T	A	-0.58255	39.8177	2.78802e-10	2L	660188	ds	ds-in	intronic	73	0.459119	19	A	G	G
2R	13741807	CG30323	41	intergenic	41	0.254658	12	A	T	A	-0.58255	39.8177	2.78802e-10	2L	660188	ds	ds-in	intronic	73	0.459119	19	A	G	G
2R	13741807	olf186-F	olf186-F-in	intronic	41	0.254658	12	A	T	A	-0.58255	39.8177	2.78802e-10	2L	660188	ds	ds-in	intronic	73	0.459119	19	A	G	G
2R	13741807	olf186-F	olf186-F-in	intronic	41	0.254658	12	A	T	A	-0.58255	39.8177	2.78802e-10	2L	660188	ds	ds-in	intronic	73	0.459119	19	A	G	G
3R	22201386	CG14239	-26245	intergenic	55	0.352564	8	C	G	C	-0.57895	39.7953	2.82018e-10	X	18460220	Bx	Bx-in	intronic	47	0.288344	10	A	T	T
3R	22201386	CG6036	30191	intergenic	55	0.352564	8	C	G	C	-0.57895	39.7953	2.82018e-10	X	18460220	Bx	Bx-in	intronic	47	0.288344	10	A	T	T
2L	1372321	lea	-7765	intergenic	19	0.115152	15	G	A	G	-0.78239	39.7379	2.9044e-10	3L	13238826	caps	caps-in	intronic	53	0.335443	12	T	G	T
2L	1372321	CG14346	3274	intergenic	19	0.115152	15	G	A	G	-0.78239	39.7379	2.9044e-10	3L	13238826	caps	caps-in	intronic	53	0.335443	12	T	G	T
2R	18380515	CG4610	CG4610-PA	synonymous	67	0.403614	20	C	T	C	0.55246	39.7302	2.91577e-10	3L	330235	Ptpmeg	Ptpmeg-in	intronic	56	0.335329	10	G	C	G
2R	15762542	CG13872	-3791	intergenic	71	0.446541	15	T	A	T	0.5913	39.7012	2.95946e-10	2L	4365252	Traf4	Traf4-in	intronic	35	0.210843	19	T	A	T
2R	15762542	Obp56i	6323	intergenic	71	0.446541	15	T	A	T	0.5913	39.7012	2.95946e-10	2L	4365252	Traf4	Traf4-in	intronic	35	0.210843	19	T	A	T
2R	19933767	tsr	tsr-in	intronic	81	0.490909	13	C	T	C	-0.62883	39.6968	2.96605e-10	3R	6393166	hth	hth-in	intronic	32	0.197531	14	C	T	T
3L	13045053	CG14115	-8569	intergenic	66	0.4	18	A	G	A	-0.49254	39.6528	3.03366e-10	2L	681915	ds	ds-in	intronic	77	0.472393	17	A	T	T
3L	13045053	CG14115	-8569	intergenic	66	0.4	18	A	G	A	-0.49254	39.6528	3.03366e-10	2L	681915	ds	ds-in	intronic	77	0.472393	17	A	T	T
3L	13045053	CG11279	4430	intergenic	66	0.4	18	A	G	A	-0.49254	39.6528	3.03366e-10	2L	681915	ds	ds-in	intronic	77	0.472393	17	A	T	T
3L	13045053	CG11279	4430	intergenic	66	0.4	18	A	G	A	-0.49254	39.6528	3.03366e-10	2L	681915	ds	ds-in	intronic	77	0.472393	17	A	T	T
X	4137158	Muc4B	-1096	intergenic	35	0.208333	18	T	C	C	0.68038	39.6451	3.04571e-10	3R	27435539	CycG	CycG-u5	UTR	32	0.197531	18	G	A	G
X	4137158	Muc4B	-1096	intergenic	35	0.208333	18	T	C	C	0.68038	39.6451	3.04571e-10	3R	27435539	CycG	CycG-u5	UTR	32	0.197531	18	G	A	G
X	4137158	Femcoat	318	intergenic	35	0.208333	18	T	C	C	0.68038	39.6451	3.04571e-10	3R	27435539	CycG	CycG-u5	UTR	32	0.197531	18	G	A	G
X	4137158	Femcoat	318	intergenic	35	0.208333	18	T	C	C	0.68038	39.6451	3.04571e-10	3R	27435539	CycG	CycG-u5	UTR	32	0.197531	18	G	A	G
2R	19385017	CG13558	-2238	intergenic	81	0.5	19	C	G	G	0.49329	39.6236	3.07948e-10	3R	26619240	wts	wts:3	missense	59	0.373418	9	C	T	C
2R	19385017	CG13558	-2238	intergenic	81	0.5	19	C	G	G	0.49329	39.6236	3.07948e-10	3R	26619240	wts	wts:3	missense	59	0.373418	9	C	T	C
2R	19385017	CG13557	21076	intergenic	81	0.5	19	C	G	G	0.49329	39.6236	3.07948e-10	3R	26619240	wts	wts:3	missense	59	0.373418	9	C	T	C
2R	19385017	CG13557	21076	intergenic	81	0.5	19	C	G	G	0.49329	39.6236	3.07948e-10	3R	26619240	wts	wts:3	missense	59	0.373418	9	C	T	C
X	22321462	CG41106	-25695	intergenic	31	0.186747	11	T	C	T	0.69748	39.6119	3.09796e-10	2R	3095450	pk	pk-in	intronic	47	0.290123	19	C	T	C
X	22321462	CG34334	44259	intergenic	31	0.186747	11	T	C	T	0.69748	39.6119	3.09796e-10	2R	3095450	pk	pk-in	intronic	47	0.290123	19	C	T	C
X	21364591	Cyp6t1	-23870	intergenic	33	0.197605	9	T	A	A	-0.6827	39.5578	3.18489e-10	2R	9920743	mam	mam-in	intronic	55	0.352564	11	T	C	C
X	21364591	Ir20a	14619	intergenic	33	0.197605	9	T	A	A	-0.6827	39.5578	3.18489e-10	2R	9920743	mam	mam-in	intronic	55	0.352564	11	T	C	C
X	4137158	Muc4B	-1096	intergenic	35	0.208333	18	T	C	C	0.68045	39.5539	3.19128e-10	3R	27437024	CycG	CycG-in	UTR	31	0.190184	21	A	T	A
X	4137158	Muc4B	-1096	intergenic	35	0.208333	18	T	C	C	0.68045	39.5539	3.19128e-10	3R	27437024	CycG	CycG-in	UTR	31	0.190184	21	A	T	A
X	4137158	Femcoat	318	intergenic	35	0.208333	18	T	C	C	0.68045	39.5539	3.19128e-10	3R	27437024	CycG	CycG-in	UTR	31	0.190184	21	A	T	A
X	4137158	Femcoat	318	intergenic	35	0.208333	18	T	C	C	0.68045	39.5539	3.19128e-10	3R	27437024	CycG	CycG-in	UTR	31	0.190184	21	A	T	A
X	4137158	Muc4B	-1096	intergenic	35	0.208333	18	T	C	C	0.68045	39.5539	3.19128e-10	3R	27437024	Med	Med-u5	UTR	31	0.190184	21	A	T	A
X	4137158	Muc4B	-1096	intergenic	35	0.208333	18	T	C	C	0.68045	39.5539	3.19128e-10	3R	27437024	Med	Med-u5	UTR	31	0.190184	21	A	T	A
X	4137158	Femcoat	318	intergenic	35	0.208333	18	T	C	C	0.68045	39.5539	3.19128e-10	3R	27437024	Med	Med-u5	UTR	31	0.190184	21	A	T	A
X	4137158	Femcoat	318	intergenic	35	0.208333	18	T	C	C	0.68045	39.5539	3.19128e-10	3R	27437024	Med	Med-u5	UTR	31	0.190184	21	A	T	A
2L	1323540	a5	-5621	intergenic	37	0.229814	15	A	G	A	0.59943	39.5449	3.20601e-10	X	16523093	rok	rok:5	missense	73	0.439759	15	G	A	A
2L	1323540	robo3	28853	intergenic	37	0.229814	15	A	G	A	0.59943	39.5449	3.20601e-10	X	16523093	rok	rok:5	missense	73	0.439759	15	G	A	A
2L	9757999	zf30C	-339	intergenic	48	0.298137	9	G	A	A	-0.70834	39.5278	3.23421e-10	2R	13724833	grh	grh-in	intronic	14	0.0843373	16	T	A	T
2L	9757999	Cyp4e3	7928	intergenic	48	0.298137	9	G	A	A	-0.70834	39.5278	3.23421e-10	2R	13724833	grh	grh-in	intronic	14	0.0843373	16	T	A	T
3L	11888140	CG11588	-26526	intergenic	33	0.2	13	C	A	C	0.64822	39.5269	3.23572e-10	2L	7827587	mts	-156	intergenic	44	0.275	11	G	A	G
3L	11888140	CG5897	4368	intergenic	33	0.2	13	C	A	C	0.64822	39.5269	3.23572e-10	2L	7827587	mts	-156	intergenic	44	0.275	11	G	A	G
2R	11402433	GalNAc-T1	GalNAc-T1-cds	synonymous	40	0.242424	18	C	G	C	0.69483	39.524	3.2405e-10	3R	26127102	hdc	hdc-in	intronic	42	0.254545	13	C	T	T
X	12717098	CG4661	-32623	intergenic	40	0.246914	6	T	A	T	-0.55807	39.5206	3.24616e-10	2L	2366059	Axud1	Axud1-in	intronic	58	0.417266	5	T	G	G
X	12717098	CG3775	18833	intergenic	40	0.246914	6	T	A	T	-0.55807	39.5206	3.24616e-10	2L	2366059	Axud1	Axud1-in	intronic	58	0.417266	5	T	G	G
X	12717098	Pde9	Pde9-in	intronic	40	0.246914	6	T	A	T	-0.55807	39.5206	3.24616e-10	2L	2366059	Axud1	Axud1-in	intronic	58	0.417266	5	T	G	G
2L	1553917	haf	-1242	intergenic	35	0.21875	16	T	C	T	-0.59435	39.5157	3.25426e-10	3R	17890288	how	how-in	intronic	52	0.327044	12	C	A	A
2L	1553917	Or22b	29658	intergenic	35	0.21875	16	T	C	T	-0.59435	39.5157	3.25426e-10	3R	17890288	how	how-in	intronic	52	0.327044	12	C	A	A
3L	6632299	eIF4E-4	-25024	intergenic	48	0.296296	14	C	A	C	0.51678	39.5022	3.27698e-10	2R	17442814	Egfr	Egfr:3	synonymous	65	0.396341	18	A	G	A
3L	6632299	eIF4E-4	-25024	intergenic	48	0.296296	14	C	A	C	0.51678	39.5022	3.27698e-10	2R	17442814	Egfr	Egfr:3	synonymous	65	0.396341	18	A	G	A
3L	6632299	Glu-RI	4133	intergenic	48	0.296296	14	C	A	C	0.51678	39.5022	3.27698e-10	2R	17442814	Egfr	Egfr:3	synonymous	65	0.396341	18	A	G	A
3L	6632299	Glu-RI	4133	intergenic	48	0.296296	14	C	A	C	0.51678	39.5022	3.27698e-10	2R	17442814	Egfr	Egfr:3	synonymous	65	0.396341	18	A	G	A
3R	23840952	CG34362	-11382	intergenic	58	0.358025	10	G	T	T	-0.50831	39.487	3.30256e-10	3L	14277392	fz	fz-in	intronic	55	0.337423	13	G	T	T
3R	23840952	CG4815	24479	intergenic	58	0.358025	10	G	T	T	-0.50831	39.487	3.30256e-10	3L	14277392	fz	fz-in	intronic	55	0.337423	13	G	T	T
2L	8311892	CG7806	CG7806-cds	synonymous	23	0.138554	15	G	A	G	0.82135	39.4621	3.34494e-10	3L	8843581	dally	dally-in	intronic	68	0.43038	8	C	T	C
X	16291872	mei-41	mei-41:4	synonymous	82	0.491018	17	C	T	C	0.55057	39.4071	3.44051e-10	3L	14316737	fz	fz-in	intronic	40	0.246914	11	A	G	A
2R	12972080	Sply	-3859	intergenic	46	0.282209	11	T	C	T	-0.57537	39.4027	3.44811e-10	3R	20130008	crb	crb-in	intronic	53	0.335443	9	G	T	G
2R	12972080	CG30460	3318	intergenic	46	0.282209	11	T	C	T	-0.57537	39.4027	3.44811e-10	3R	20130008	crb	crb-in	intronic	53	0.335443	9	G	T	G
3L	890638	CG34056	-5313	intergenic	55	0.329341	23	A	G	G	0.56481	39.3997	3.45343e-10	3L	18170988	W	W-in	intronic	37	0.226994	18	G	T	G
3L	890638	CG13907	8765	intergenic	55	0.329341	23	A	G	G	0.56481	39.3997	3.45343e-10	3L	18170988	W	W-in	intronic	37	0.226994	18	G	T	G
3L	890638	CG32479	CG32479:6	synonymous	55	0.329341	23	A	G	G	0.56481	39.3997	3.45343e-10	3L	18170988	W	W-in	intronic	37	0.226994	18	G	T	G
3R	14784043	CG42613	CG42613-in	intergenic	41	0.251534	16	T	C	T	-0.60272	39.3779	3.49234e-10	2R	9363166	arr	arr-in	intronic	14	0.112903	5	G	A	G
3R	22201410	CG14239	-26221	intergenic	57	0.363057	9	A	G	A	-0.58562	39.3773	3.49341e-10	X	18460246	Bx	Bx-in	intronic	47	0.290123	9	A	G	G
3R	22201410	CG6036	30215	intergenic	57	0.363057	9	A	G	A	-0.58562	39.3773	3.49341e-10	X	18460246	Bx	Bx-in	intronic	47	0.290123	9	A	G	G
3R	26084796	hdc	-18860	intergenic	31	0.19375	18	A	C	A	0.56205	39.3661	3.51343e-10	3R	10528117	kibra	kibra-cds	synonymous	78	0.4875	20	T	A	A
3R	26084796	CG18404	4977	intergenic	31	0.19375	18	A	C	A	0.56205	39.3661	3.51343e-10	3R	10528117	kibra	kibra-cds	synonymous	78	0.4875	20	T	A	A
3L	1189303	CG13912	-287	intergenic	31	0.186747	17	A	G	A	0.55885	39.3547	3.53403e-10	3R	6377239	hth	hth-in	intronic	71	0.435583	13	A	C	A
3L	1189303	bab2	12029	intergenic	31	0.186747	17	A	G	A	0.55885	39.3547	3.53403e-10	3R	6377239	hth	hth-in	intronic	71	0.435583	13	A	C	A
2L	9758274	zf30C	-64	intergenic	46	0.289308	12	G	A	A	-0.72974	39.3461	3.54962e-10	2R	13724833	grh	grh-in	intronic	14	0.0843373	16	T	A	T
2L	9758274	Cyp4e3	8203	intergenic	46	0.289308	12	G	A	A	-0.72974	39.3461	3.54962e-10	2R	13724833	grh	grh-in	intronic	14	0.0843373	16	T	A	T
X	10376656	CG32687	CG32687-u3	UTR	43	0.259036	10	C	T	C	-0.59001	39.294	3.64554e-10	3R	26164243	hdc	hdc-in	intronic	56	0.352201	14	A	G	G
3L	8725521	Cp16	Cp16-in		20	0.119048	40	T	G	G	-0.66578	39.2884	3.65605e-10	3L	13230394	caps	caps-in	intronic	42	0.270968	9	G	T	G
X	8433716	l(1)G0095	-15560	intergenic	65	0.389222	7	A	G	A	-0.52654	39.2725	3.68594e-10	3L	12206084	app	app-u3	UTR	44	0.269939	10	A	T	A
X	8433716	PIP82	9985	intergenic	65	0.389222	7	A	G	A	-0.52654	39.2725	3.68594e-10	3L	12206084	app	app-u3	UTR	44	0.269939	10	A	T	A
X	8433716	Nrg	Nrg-in	intronic	65	0.389222	7	A	G	A	-0.52654	39.2725	3.68594e-10	3L	12206084	app	app-u3	UTR	44	0.269939	10	A	T	A
3L	16011841	Notum	-4739	intergenic	66	0.415094	17	A	T	A	0.50063	39.2689	3.6927e-10	2L	5228316	tkv	tkv-in	intronic	72	0.444444	11	C	T	C
3L	16011841	mib1	6929	intergenic	66	0.415094	17	A	T	A	0.50063	39.2689	3.6927e-10	2L	5228316	tkv	tkv-in	intronic	72	0.444444	11	C	T	C
3R	24275909	beat-VI	beat-VI-in	intronic	61	0.386076	18	A	G	G	-0.69494	39.2552	3.71877e-10	2R	13724833	grh	grh-in	intronic	14	0.0843373	16	T	A	T
3R	18154380	CG7080	-643	intergenic	45	0.28481	15	C	A	C	-0.60167	39.2552	3.71886e-10	3L	3986017	scrt	scrt-in	intronic	30	0.186335	14	C	T	C
3R	18154380	CG13858	9704	intergenic	45	0.28481	15	C	A	C	-0.60167	39.2552	3.71886e-10	3L	3986017	scrt	scrt-in	intronic	30	0.186335	14	C	T	C
3L	1285456	CG32333	CG32333-in	intronic	44	0.268293	15	G	T	G	0.61078	39.2467	3.73495e-10	3L	12241116	app	app-in	intronic	73	0.445122	7	T	G	T
2L	5666101	Hsp60C	Hsp60C-in	intronic	48	0.309677	13	A	G	A	0.76244	39.2447	3.73874e-10	2R	13724833	grh	grh-in	intronic	14	0.0843373	16	T	A	T
3L	1913678	Dbx	-7629	intergenic	62	0.389937	10	G	A	A	-0.52043	39.2438	3.74055e-10	X	15722580	Chc	Chc-in	intronic	63	0.377246	19	T	A	T
3L	1913678	CG1887	3481	intergenic	62	0.389937	10	G	A	A	-0.52043	39.2438	3.74055e-10	X	15722580	Chc	Chc-in	intronic	63	0.377246	19	T	A	T
2R	12501469	CG5065	CG5065-in	intronic	39	0.239264	14	G	A	A	-0.69824	39.2411	3.74568e-10	2R	9783424	shot	shot-in	intronic	23	0.141975	16	C	A	C
3R	5346690	by	-7270	intergenic	69	0.445161	11	C	T	T	0.53458	39.2392	3.7494e-10	2R	13726519	grh	grh-in	intronic	42	0.26087	14	G	A	G
3R	5346690	mir-2283	3369	intergenic	69	0.445161	11	C	T	T	0.53458	39.2392	3.7494e-10	2R	13726519	grh	grh-in	intronic	42	0.26087	14	G	A	G
3R	5346690	CG8176	CG8176-in	intronic	69	0.445161	11	C	T	T	0.53458	39.2392	3.7494e-10	2R	13726519	grh	grh-in	intronic	42	0.26087	14	G	A	G
3L	9501865	CG3408	CG3408-in	intronic	72	0.428571	15	T	G	T	0.56869	39.2199	3.78661e-10	2L	4365475	Traf4	Traf4-in	intronic	34	0.204819	11	C	G	C
X	8390808	CG33181	CG33181-in	intronic	30	0.179641	14	A	G	A	0.62994	39.2095	3.80681e-10	3R	25291078	Ptp99A	Ptp99A-in	intronic	40	0.243902	19	T	C	T
3R	20386259	CG13624	CG13624-PC	missense	59	0.36646	17	G	A	A	-0.61475	39.1993	3.82673e-10	2L	1065390	S	S-in	intronic	42	0.264151	18	G	T	G
X	18192110	os	-7267	intergenic	46	0.275449	15	G	A	A	0.58206	39.1978	3.82971e-10	2L	5269837	tkv	tkv-in	missense	51	0.320755	27	G	A	G
X	18192110	upd3	13478	intergenic	46	0.275449	15	G	A	A	0.58206	39.1978	3.82971e-10	2L	5269837	tkv	tkv-in	missense	51	0.320755	27	G	A	G
2R	9307128	CG42321	CG42321:8	synonymous	26	0.158537	22	C	T	C	-0.66747	39.1965	3.83224e-10	3L	7975838	nmo	nmo-in	intronic	44	0.280255	15	T	G	T
X	11630586	m	-17720	intergenic	21	0.126506	17	T	A	T	-0.64097	39.1904	3.84433e-10	3L	8823312	dally	dally-in	intronic	57	0.345455	18	T	A	T
X	11630586	inaF-C	4788	intergenic	21	0.126506	17	T	A	T	-0.64097	39.1904	3.84433e-10	3L	8823312	dally	dally-in	intronic	57	0.345455	18	T	A	T
X	11630586	CG15221	CG15221-u3	UTR	21	0.126506	17	T	A	T	-0.64097	39.1904	3.84433e-10	3L	8823312	dally	dally-in	intronic	57	0.345455	18	T	A	T
2R	18831068	CG42694	CG42694-in	intergenic	21	0.128834	16	G	A	G	-0.73918	39.1817	3.86137e-10	2R	18263350	Rtf1	Rtf1:2	synonymous	34	0.206061	19	G	A	G
2L	10535955	CG18302	CG18302-cds	synonymous	69	0.43949	19	T	C	C	0.49733	39.1806	3.86367e-10	3R	12112176	gish	gish-in	intronic	73	0.474026	13	T	C	T
2R	17885327	CG34370	CG34370-in	intronic	58	0.367089	15	G	A	G	-0.51201	39.1765	3.87177e-10	3R	21854790	HLHm5	HLHm5-u3	UTR	63	0.396226	20	C	T	T
2R	18287816	CG3624	CG3624-in	intronic	61	0.371951	14	A	G	A	-0.70869	39.1741	3.87659e-10	2R	13724833	grh	grh-in	intronic	14	0.0843373	16	T	A	T
3L	18153861	CG13699	CG13699-in	intronic	65	0.424837	8	G	A	G	0.56894	39.151	3.92267e-10	2R	10464494	ttv	ttv-in	intronic	43	0.265432	17	A	C	A
3R	22201386	CG14239	-26245	intergenic	55	0.352564	8	C	G	C	-0.57535	39.1182	3.98913e-10	X	18460246	Bx	Bx-in	intronic	47	0.290123	9	A	G	G
3R	22201386	CG6036	30191	intergenic	55	0.352564	8	C	G	C	-0.57535	39.1182	3.98913e-10	X	18460246	Bx	Bx-in	intronic	47	0.290123	9	A	G	G
X	14265811	dpr8	dpr8-in	intronic	78	0.467066	11	A	G	G	0.48716	39.1086	4.00866e-10	3R	27709043	heph	heph-in	intronic	72	0.45	20	G	A	G
3R	25293430	Ptp99A	Ptp99A-in	intronic	75	0.465839	11	A	T	T	-0.54352	39.1079	4.01011e-10	X	18460257	Bx	Bx-in	intronic	48	0.296296	10	T	A	A
X	18460257	CG15040	-40478	intergenic	48	0.296296	10	T	A	A	-0.54352	39.1079	4.01011e-10	3R	25293430	Ptp99A	Ptp99A-in	intronic	75	0.465839	11	A	T	T
X	18460257	tRNA:CR32546	389	intergenic	48	0.296296	10	T	A	A	-0.54352	39.1079	4.01011e-10	3R	25293430	Ptp99A	Ptp99A-in	intronic	75	0.465839	11	A	T	T
X	18460257	Bx	Bx-in	intronic	48	0.296296	10	T	A	A	-0.54352	39.1079	4.01011e-10	3R	25293430	Ptp99A	Ptp99A-in	intronic	75	0.465839	11	A	T	T
2R	12876432	Cbp53E	Cbp53E-in	intronic	46	0.280488	18	C	T	C	-0.67468	39.1069	4.01223e-10	2R	9779827	shot	shot:21	missense	28	0.167665	25	T	C	T
2R	12876432	Cbp53E	Cbp53E-in	intronic	46	0.280488	18	C	T	C	-0.67468	39.1069	4.01223e-10	2R	9779820	shot	shot:21	synonymous	28	0.167665	25	G	A	G
X	554900	sdk	-25973	intergenic	58	0.351515	14	A	T	T	0.61153	39.104	4.01814e-10	2R	14169092	sbb	sbb-in	intronic	36	0.216867	16	T	C	T
X	554900	skpA	2963	intergenic	58	0.351515	14	A	T	T	0.61153	39.104	4.01814e-10	2R	14169092	sbb	sbb-in	intronic	36	0.216867	16	T	C	T
X	22073690	CG12446	-137433	intergenic	78	0.47561	7	A	G	A	0.46932	39.0904	4.04628e-10	3L	12242091	app	app-in	intronic	49	0.374046	8	C	T	C
X	22073690	Cda4	39145	intergenic	78	0.47561	7	A	G	A	0.46932	39.0904	4.04628e-10	3L	12242091	app	app-in	intronic	49	0.374046	8	C	T	C
3L	803517	CG13898	CG13898-u3	UTR	48	0.287425	14	T	C	T	-0.59119	39.0903	4.04649e-10	2R	13727623	grh	grh-in	intronic	47	0.297468	6	G	A	G
3L	19019529	nkd	nkd-in	intronic	39	0.25	11	G	A	G	0.6066	39.0858	4.05578e-10	3R	25289439	Ptp99A	Ptp99A-in	intronic	67	0.41358	14	T	C	T
3L	10288336	mir-276b	-24549	intergenic	62	0.427586	4	T	C	C	-0.52744	39.0847	4.05814e-10	2R	17426927	Egfr	Egfr-in	intronic	42	0.264151	11	C	T	C
3L	10288336	mir-276b	-24549	intergenic	62	0.427586	4	T	C	C	-0.52744	39.0847	4.05814e-10	2R	17426927	Egfr	Egfr-in	intronic	42	0.264151	11	C	T	C
3L	10288336	Or67d	20612	intergenic	62	0.427586	4	T	C	C	-0.52744	39.0847	4.05814e-10	2R	17426927	Egfr	Egfr-in	intronic	42	0.264151	11	C	T	C
3L	10288336	Or67d	20612	intergenic	62	0.427586	4	T	C	C	-0.52744	39.0847	4.05814e-10	2R	17426927	Egfr	Egfr-in	intronic	42	0.264151	11	C	T	C
3L	18850189	mir-315	-3882	intergenic	73	0.462025	14	C	G	C	0.48908	39.084	4.05961e-10	3L	18174446	W	W-in	intronic	70	0.443038	12	C	G	G
3L	18850189	CG32027	14302	intergenic	73	0.462025	14	C	G	C	0.48908	39.084	4.05961e-10	3L	18174446	W	W-in	intronic	70	0.443038	12	C	G	G
2R	12718765	mir-8	-172	intergenic	66	0.437086	15	A	T	A	0.70352	39.0605	4.10864e-10	2R	13724833	grh	grh-in	intronic	14	0.0843373	16	T	A	T
2R	12718765	CG34460	3455	intergenic	66	0.437086	15	A	T	A	0.70352	39.0605	4.10864e-10	2R	13724833	grh	grh-in	intronic	14	0.0843373	16	T	A	T
2R	20530738	CG3663	-18309	intergenic	59	0.36646	19	G	A	G	0.59312	39.0545	4.12127e-10	3L	13234308	caps	caps-in	intronic	36	0.220859	11	A	G	A
2R	20530738	CG4781	978	intergenic	59	0.36646	19	G	A	G	0.59312	39.0545	4.12127e-10	3L	13234308	caps	caps-in	intronic	36	0.220859	11	A	G	A
3R	19186681	CG4408	-930	intergenic	36	0.220859	21	A	G	A	0.60443	39.0521	4.12639e-10	2L	1050451	S	-426	intergenic	58	0.36478	25	T	C	C
3R	19186681	RpS3	984	intergenic	36	0.220859	21	A	G	A	0.60443	39.0521	4.12639e-10	2L	1050451	S	-426	intergenic	58	0.36478	25	T	C	C
X	18732449	Pvf1	Pvf1-in	intronic	19	0.114458	7	G	T	G	0.71471	39.0403	4.15148e-10	X	21933008	S6kII	S6kII-cds	synonymous	68	0.404762	20	C	T	C
2R	19383389	CG13558	-3866	intergenic	54	0.327273	20	T	A	T	0.55722	39.0401	4.15199e-10	3L	16634665	Abl	Abl-in	intronic	34	0.206061	14	T	A	T
2R	19383389	CG13557	19448	intergenic	54	0.327273	20	T	A	T	0.55722	39.0401	4.15199e-10	3L	16634665	Abl	Abl-in	intronic	34	0.206061	14	T	A	T
X	5428196	Vsx2	Vsx2-in	intronic	27	0.162651	13	T	A	T	-0.65695	39.0317	4.16972e-10	3L	2748816	Mrtf	Mrtf-in	intronic	68	0.409639	11	G	C	G
X	19020093	tgy	tgy-u3	synonymous	28	0.169697	13	A	G	G	-0.64388	39.027	4.17989e-10	2L	5266804	tkv	tkv-in	synonymous	55	0.350318	13	C	T	C
3R	25549441	Pcd	Pcd-in	intronic	32	0.195122	22	T	G	T	-0.61664	39.0246	4.18508e-10	3L	2721783	Mrtf	Mrtf-PB	synonymous	55	0.331325	17	C	T	T
X	5925033	rux	-4753	intergenic	36	0.215569	12	G	T	G	-0.59231	39.0124	4.21116e-10	2L	7911181	Snoo	Snoo-in	intronic	55	0.350318	10	A	T	T
X	5925033	mab-21	17822	intergenic	36	0.215569	12	G	T	G	-0.59231	39.0124	4.21116e-10	2L	7911181	Snoo	Snoo-in	intronic	55	0.350318	10	A	T	T
3R	26259010	CG15534	CG15534:2	synonymous	66	0.420382	16	A	C	A	0.73536	39.0107	4.21482e-10	3L	15973486	brm	brm-in	missense	20	0.11976	25	A	T	A
3L	11679252	Sug	Sug:2	synonymous	83	0.5	13	T	C	T	0.6296	39.0065	4.22391e-10	3L	8444537	Gug	Gug-in	intronic	15	0.100671	8	G	A	G
2L	5723010	sip1	sip1:2	synonymous	18	0.109756	18	A	G	A	0.73114	38.9981	4.24218e-10	X	16530435	rok	rok-in	intronic	50	0.30303	17	T	C	T
3L	10121050	dpr10	-19503	intergenic	23	0.137725	17	G	A	G	-0.70269	38.9941	4.25093e-10	3L	3341116	kst	kst-in	intronic	63	0.384146	16	G	C	C
3L	10121050	CG42826	27069	intergenic	23	0.137725	17	G	A	G	-0.70269	38.9941	4.25093e-10	3L	3341116	kst	kst-in	intronic	63	0.384146	16	G	C	C
2R	6655403	CG33144	CG33144-in	intronic	22	0.134146	13	G	T	G	0.72303	38.9872	4.26601e-10	2L	2895199	lilli	lilli-in	intronic	36	0.233766	7	C	A	C
3R	27531677	CG42693	-1915	intergenic	65	0.408805	17	T	C	C	-0.59747	38.9831	4.27491e-10	3L	5800183	S6k	S6k-in	intronic	30	0.180723	22	T	C	T
3R	27531677	CG42693	-1915	intergenic	65	0.408805	17	T	C	C	-0.59747	38.9831	4.27491e-10	3L	5800183	S6k	S6k-in	intronic	30	0.180723	22	T	C	T
3R	27531677	CG11550	26075	intergenic	65	0.408805	17	T	C	C	-0.59747	38.9831	4.27491e-10	3L	5800183	S6k	S6k-in	intronic	30	0.180723	22	T	C	T
3R	27531677	CG11550	26075	intergenic	65	0.408805	17	T	C	C	-0.59747	38.9831	4.27491e-10	3L	5800183	S6k	S6k-in	intronic	30	0.180723	22	T	C	T
3L	7407185	CG42458	-9742	intergenic	20	0.125	20	G	A	A	0.73162	38.9822	4.27684e-10	3R	26178730	hdc	hdc-in	intronic	37	0.232704	14	G	A	G
3L	7407185	pncr015:3L	7466	intergenic	20	0.125	20	G	A	A	0.73162	38.9822	4.27684e-10	3R	26178730	hdc	hdc-in	intronic	37	0.232704	14	G	A	G
2L	15139358	CG4168	-22749	intergenic	67	0.41875	18	G	T	T	0.47042	38.978	4.28616e-10	2R	9930207	mam	mam-in	intronic	79	0.484663	11	C	G	C
2L	15139358	tRNA:L:35C	6969	intergenic	67	0.41875	18	G	T	T	0.47042	38.978	4.28616e-10	2R	9930207	mam	mam-in	intronic	79	0.484663	11	C	G	C
2L	9107054	Or30a	-4760	intergenic	47	0.286585	12	A	T	A	-0.55036	38.9512	4.34542e-10	2R	9841125	AGO1	AGO1-in	intronic	55	0.337423	12	A	G	A
2L	9107054	CG31609	8878	intergenic	47	0.286585	12	A	T	A	-0.55036	38.9512	4.34542e-10	2R	9841125	AGO1	AGO1-in	intronic	55	0.337423	12	A	G	A
2R	6655401	CG33144	CG33144-in	intronic	25	0.152439	14	T	A	T	0.73693	38.9467	4.35531e-10	2L	2895199	lilli	lilli-in	intronic	36	0.233766	7	C	A	C
2L	2208433	CG33124	CG33124:6	synonymous	33	0.20625	16	G	A	G	0.57024	38.9449	4.35949e-10	X	4313449	bi	bi-in	intronic	68	0.407186	13	C	T	T
2L	14605284	osp	osp-in	intronic	42	0.269231	18	T	C	T	-0.68253	38.9415	4.36698e-10	3L	7996714	nmo	nmo-in	RNA	37	0.22561	16	C	T	C
2R	17530387	CG10082	-3296	intergenic	21	0.127273	10	T	G	T	0.6824	38.9284	4.39646e-10	2L	7896850	Snoo	Snoo-in	intronic	53	0.339744	9	G	A	G
2R	17530387	CG10082	-3296	intergenic	21	0.127273	10	T	G	T	0.6824	38.9284	4.39646e-10	2L	7896885	Snoo	Snoo-in	intronic	54	0.348387	11	C	A	C
2R	17530387	CG10321	4481	intergenic	21	0.127273	10	T	G	T	0.6824	38.9284	4.39646e-10	2L	7896850	Snoo	Snoo-in	intronic	53	0.339744	9	G	A	G
2R	17530387	CG10321	4481	intergenic	21	0.127273	10	T	G	T	0.6824	38.9284	4.39646e-10	2L	7896885	Snoo	Snoo-in	intronic	54	0.348387	11	C	A	C
2L	6375490	slam	slam-cds	synonymous	35	0.217391	21	A	G	A	-0.64687	38.9266	4.40049e-10	3L	11245913	scyl	scyl-u5	UTR	42	0.254545	12	A	T	A
3R	10395222	Cys	Cys-cds	missense	67	0.41358	16	T	C	T	-0.4987	38.9246	4.40497e-10	2R	2025882	EcR	EcR-in	UTR	53	0.33758	12	G	A	G
2L	4277676	Art2	-20	intergenic	24	0.150943	18	G	A	G	0.75276	38.9123	4.43291e-10	3R	25273181	Ptp99A	Ptp99A-in	intronic	28	0.171779	16	G	A	G
2L	4277676	CG15425	19251	intergenic	24	0.150943	18	G	A	G	0.75276	38.9123	4.43291e-10	3R	25273181	Ptp99A	Ptp99A-in	intronic	28	0.171779	16	G	A	G
X	1611956	Scgdelta	-27953	intergenic	63	0.377246	14	T	C	T	-0.62762	38.9092	4.43977e-10	3L	8442903	Gug	-119	intergenic	30	0.181818	10	C	A	C
X	1611956	CG3795	7760	intergenic	63	0.377246	14	T	C	T	-0.62762	38.9092	4.43977e-10	3L	8442903	Gug	-119	intergenic	30	0.181818	10	C	A	C
X	6609190	CG14441	CG14441-in	intronic	72	0.45	7	A	C	A	0.47942	38.8896	4.48464e-10	3L	8448257	Gug	Gug-in	intronic	60	0.365854	15	A	G	A
3L	14178133	nan	-1211	intergenic	29	0.18125	7	A	G	G	0.74754	38.8886	4.48693e-10	3L	3846781	Awh	Awh-in	intronic	24	0.145455	14	G	C	G
3L	14178133	D	6413	intergenic	29	0.18125	7	A	G	G	0.74754	38.8886	4.48693e-10	3L	3846781	Awh	Awh-in	intronic	24	0.145455	14	G	C	G
2R	18873498	CG9897	CG9897:2	synonymous	57	0.343373	13	G	T	G	-0.69301	38.8881	4.48818e-10	2R	13724833	grh	grh-in	intronic	14	0.0843373	16	T	A	T
2R	18873498	CR42742	CR42742:2	synonymous	57	0.343373	13	G	T	G	-0.69301	38.8881	4.48818e-10	2R	13724833	grh	grh-in	intronic	14	0.0843373	16	T	A	T
3R	13045803	CG31262	CG31262-in	intronic	46	0.283951	11	C	A	C	0.57013	38.8772	4.51313e-10	3L	9633289	fry	fry-in	intronic	55	0.337423	9	T	C	C
2R	9307128	CG42321	CG42321:8	synonymous	26	0.158537	22	C	T	C	-0.65812	38.867	4.53694e-10	3L	7975840	nmo	nmo-in	intronic	47	0.29375	14	C	A	C
3L	11268212	CG6175	-12810	intergenic	56	0.343558	12	G	A	G	0.58346	38.8646	4.54248e-10	2R	13697530	grh	grh-in	intronic	47	0.288344	14	C	T	C
3L	11268212	scyl	19869	intergenic	56	0.343558	12	G	A	G	0.58346	38.8646	4.54248e-10	2R	13697530	grh	grh-in	intronic	47	0.288344	14	C	T	C
X	17885780	Sh	Sh-in	intronic	54	0.325301	13	G	C	G	-0.4816	38.8578	4.55818e-10	3L	12611580	caup	caup:4	synonymous	83	0.497006	21	C	T	C
X	22321462	CG41106	-25695	intergenic	31	0.186747	11	T	C	T	0.64454	38.853	4.56942e-10	2R	6380330	lola	lola-in	intronic	41	0.248485	15	G	T	T
X	22321462	CG41106	-25695	intergenic	31	0.186747	11	T	C	T	0.64454	38.853	4.56942e-10	2R	6380330	lola	lola-in	intronic	41	0.248485	15	G	T	T
X	22321462	CG34334	44259	intergenic	31	0.186747	11	T	C	T	0.64454	38.853	4.56942e-10	2R	6380330	lola	lola-in	intronic	41	0.248485	15	G	T	T
X	22321462	CG34334	44259	intergenic	31	0.186747	11	T	C	T	0.64454	38.853	4.56942e-10	2R	6380330	lola	lola-in	intronic	41	0.248485	15	G	T	T
X	10864432	CG42339	CG42339-in	intronic	31	0.2	4	C	A	C	-0.67604	38.8363	4.60872e-10	3L	354807	Ptpmeg	Ptpmeg:17	synonymous	34	0.208589	17	A	G	A
X	4865181	CG12680	-26391	intergenic	35	0.209581	12	A	T	A	-0.63757	38.817	4.65447e-10	3L	14966083	Brd	Brd-cds	synonymous	65	0.401235	17	G	A	A
X	4865181	SIP3	10148	intergenic	35	0.209581	12	A	T	A	-0.63757	38.817	4.65447e-10	3L	14966083	Brd	Brd-cds	synonymous	65	0.401235	17	G	A	A
2R	19383400	CG13558	-3855	intergenic	54	0.329268	21	A	G	A	0.55742	38.8052	4.68285e-10	3L	16634665	Abl	Abl-in	intronic	34	0.206061	14	T	A	T
2R	19383400	CG13557	19459	intergenic	54	0.329268	21	A	G	A	0.55742	38.8052	4.68285e-10	3L	16634665	Abl	Abl-in	intronic	34	0.206061	14	T	A	T
X	12717098	CG4661	-32623	intergenic	40	0.246914	6	T	A	T	-0.55384	38.8005	4.69417e-10	2L	2367823	Axud1	Axud1-cds	synonymous	62	0.389937	15	A	G	G
X	12717098	CG3775	18833	intergenic	40	0.246914	6	T	A	T	-0.55384	38.8005	4.69417e-10	2L	2367823	Axud1	Axud1-cds	synonymous	62	0.389937	15	A	G	G
X	12717098	Pde9	Pde9-in	intronic	40	0.246914	6	T	A	T	-0.55384	38.8005	4.69417e-10	2L	2367823	Axud1	Axud1-cds	synonymous	62	0.389937	15	A	G	G
2L	16373297	CG5888	-26872	intergenic	30	0.193548	16	A	C	A	0.625	38.7865	4.728e-10	X	2381084	trol	trol:20	synonymous	52	0.311377	15	G	A	A
2L	16373297	jhamt	6320	intergenic	30	0.193548	16	A	C	A	0.625	38.7865	4.728e-10	X	2381084	trol	trol:20	synonymous	52	0.311377	15	G	A	A
X	14381302	CG12540	-8868	intergenic	40	0.239521	10	A	T	A	-0.62981	38.785	4.73147e-10	3R	25263542	Ptp99A	Ptp99A-in	intronic	58	0.355828	15	T	A	T
X	14381302	CG9411	7190	intergenic	40	0.239521	10	A	T	A	-0.62981	38.785	4.73147e-10	3R	25263542	Ptp99A	Ptp99A-in	intronic	58	0.355828	15	T	A	T
X	14753948	CG9518	-3074	intergenic	43	0.260606	13	C	A	C	0.56657	38.7755	4.75453e-10	2R	10451815	ttv	ttv-in	intronic	67	0.411043	15	C	T	C
X	14753948	CG9519	3554	intergenic	43	0.260606	13	C	A	C	0.56657	38.7755	4.75453e-10	2R	10451815	ttv	ttv-in	intronic	67	0.411043	15	C	T	C
X	14753948	Flo-2	Flo-2-in	intronic	43	0.260606	13	C	A	C	0.56657	38.7755	4.75453e-10	2R	10451815	ttv	ttv-in	intronic	67	0.411043	15	C	T	C
2R	6189664	CAP	CAP-in	intronic	27	0.176471	8	A	C	C	-0.79553	38.7643	4.7819e-10	2L	10815150	Nos	Nos-in	intronic	24	0.154839	11	C	T	C
2R	15956037	18w	-42979	intergenic	21	0.126506	16	C	T	C	0.71097	38.7473	4.82382e-10	2L	20797337	vari	297	intergenic	43	0.273885	12	G	T	G
2R	15956037	CG16898	63545	intergenic	21	0.126506	16	C	T	C	0.71097	38.7473	4.82382e-10	2L	20797337	vari	297	intergenic	43	0.273885	12	G	T	G
2L	19297443	CG17564	-902	intergenic	31	0.2	19	G	A	A	-0.63989	38.7453	4.82866e-10	3L	14329504	fz	fz-in	intronic	48	0.292683	14	A	G	G
2L	19297443	CG31797	35310	intergenic	31	0.2	19	G	A	A	-0.63989	38.7453	4.82866e-10	3L	14329504	fz	fz-in	intronic	48	0.292683	14	A	G	G
X	11630630	m	-17676	intergenic	22	0.131737	16	G	T	G	-0.64121	38.742	4.83675e-10	3L	8823312	dally	dally-in	intronic	57	0.345455	18	T	A	T
X	11630630	inaF-C	4832	intergenic	22	0.131737	16	G	T	G	-0.64121	38.742	4.83675e-10	3L	8823312	dally	dally-in	intronic	57	0.345455	18	T	A	T
X	11630630	CG15221	CG15221-u3	UTR	22	0.131737	16	G	T	G	-0.64121	38.742	4.83675e-10	3L	8823312	dally	dally-in	intronic	57	0.345455	18	T	A	T
3R	26602984	zfh1	zfh1-in	intronic	77	0.496774	10	A	T	A	0.49158	38.7415	4.83802e-10	3L	7975800	nmo	nmo-in	intronic	62	0.375758	14	C	T	C
3L	17985411	Eip75B	Eip75B-in	intronic	54	0.3375	14	A	T	A	0.52162	38.7216	4.88759e-10	3L	8005084	nmo	nmo-in	intronic	57	0.407143	8	C	A	C
2L	7068276	CG11289	CG11289:1	synonymous	56	0.35	22	C	T	C	-0.59815	38.7214	4.8881e-10	3R	25242858	Ptp99A	Ptp99A-in	intronic	32	0.193939	17	G	A	G
3L	5385761	CG34391	-38971	intergenic	38	0.22619	15	C	T	C	0.57983	38.7212	4.88882e-10	3L	5799679	S6k	S6k:6	missense	72	0.439024	25	A	G	G
3L	5385761	CG34391	-38971	intergenic	38	0.22619	15	C	T	C	0.57983	38.7212	4.88882e-10	3L	5799679	S6k	S6k:6	missense	72	0.439024	25	A	G	G
3L	5385761	Ir64a	9840	intergenic	38	0.22619	15	C	T	C	0.57983	38.7212	4.88882e-10	3L	5799679	S6k	S6k:6	missense	72	0.439024	25	A	G	G
3L	5385761	Ir64a	9840	intergenic	38	0.22619	15	C	T	C	0.57983	38.7212	4.88882e-10	3L	5799679	S6k	S6k:6	missense	72	0.439024	25	A	G	G
X	14381302	CG12540	-8868	intergenic	40	0.239521	10	A	T	A	-0.65119	38.7093	4.91865e-10	3R	25263547	Ptp99A	Ptp99A-in	intronic	55	0.34375	15	G	A	G
X	14381302	CG9411	7190	intergenic	40	0.239521	10	A	T	A	-0.65119	38.7093	4.91865e-10	3R	25263547	Ptp99A	Ptp99A-in	intronic	55	0.34375	15	G	A	G
2R	14686962	l(2)08717		intronic	40	0.240964	15	G	C	G	0.59237	38.6993	4.94382e-10	2R	14169084	sbb	sbb-in	intronic	35	0.212121	17	A	G	A
3L	1393847	tRNA:E4:62Aa	-3848	intergenic	68	0.407186	15	G	A	A	0.5272	38.6814	4.98947e-10	2R	9766422	shot	shot:19	synonymous	44	0.269939	23	C	T	C
3L	1393847	tRNA:CR32329	13247	intergenic	68	0.407186	15	G	A	A	0.5272	38.6814	4.98947e-10	2R	9766422	shot	shot:19	synonymous	44	0.269939	23	C	T	C
3L	1393847	Ptp61F	Ptp61F-in	intronic	68	0.407186	15	G	A	A	0.5272	38.6814	4.98947e-10	2R	9766422	shot	shot:19	synonymous	44	0.269939	23	C	T	C
X	21364591	Cyp6t1	-23870	intergenic	33	0.197605	9	T	A	A	-0.66564	38.6549	5.05758e-10	2R	9920752	mam	mam-in	intronic	55	0.354839	11	A	T	T
X	21364591	Ir20a	14619	intergenic	33	0.197605	9	T	A	A	-0.66564	38.6549	5.05758e-10	2R	9920752	mam	mam-in	intronic	55	0.354839	11	A	T	T
2R	9599472	CG6280	-43377	intergenic	69	0.428571	11	A	C	A	-0.53105	38.6546	5.05851e-10	2L	10834047	Nos	Nos-in	intronic	48	0.322148	9	A	C	A
2R	9599472	CG6220	18598	intergenic	69	0.428571	11	A	C	A	-0.53105	38.6546	5.05851e-10	2L	10834047	Nos	Nos-in	intronic	48	0.322148	9	A	C	A
2R	9599472	fas	fas-in	intronic	69	0.428571	11	A	C	A	-0.53105	38.6546	5.05851e-10	2L	10834047	Nos	Nos-in	intronic	48	0.322148	9	A	C	A
X	16901274	CG9059	CG9059-in	intronic	80	0.484848	7	G	A	A	0.51522	38.6505	5.06908e-10	3R	9887710	foxo	foxo-in	intronic	62	0.4	14	G	A	A
3L	18647712	MYPT-75D	MYPT-75D-in	intronic	38	0.233129	11	T	A	T	0.72939	38.6405	5.09511e-10	3L	14349988	fz	fz-in	intronic	22	0.144737	10	A	C	C
2R	5794867	Fmrf	Fmrf-in	intronic	52	0.327044	20	T	A	A	0.53631	38.6274	5.12934e-10	2L	4108606	ed	ed-in	intronic	64	0.4	19	G	T	G
2R	5794867	Fmrf	Fmrf-in	intronic	52	0.327044	20	T	A	A	0.53631	38.6274	5.12934e-10	2L	4108606	ed	ed-in	intronic	64	0.4	19	G	T	G
3L	3908879	mge	mge-in	intronic	34	0.204819	18	A	T	A	0.67958	38.6248	5.13618e-10	2R	18140806	dve	dve-in	intronic	23	0.140244	25	T	C	C
3L	19386086	CR32205	-29852	intergenic	18	0.107784	13	A	T	T	-0.70243	38.6205	5.14762e-10	3L	13264634	caps	caps-in	intronic	70	0.429448	10	C	A	A
3L	19386086	CG14087	2953	intergenic	18	0.107784	13	A	T	T	-0.70243	38.6205	5.14762e-10	3L	13264634	caps	caps-in	intronic	70	0.429448	10	C	A	A
3L	19386086	CG32206	CG32206-in	intronic	18	0.107784	13	A	T	T	-0.70243	38.6205	5.14762e-10	3L	13264634	caps	caps-in	intronic	70	0.429448	10	C	A	A
X	16004313	disco-r	-8508	intergenic	30	0.180723	11	A	G	A	-0.62112	38.612	5.16995e-10	3L	9658001	fry	fry-in	intronic	51	0.314815	9	G	A	A
X	16004313	CG42353	5368	intergenic	30	0.180723	11	A	G	A	-0.62112	38.612	5.16995e-10	3L	9658001	fry	fry-in	intronic	51	0.314815	9	G	A	A
2L	19642831	Lar	Lar-in	intronic	29	0.18239	14	A	T	A	-0.66316	38.6089	5.17817e-10	3R	17405176	InR	InR-in	intronic	55	0.34375	22	C	T	C
2L	19642831	Lar	Lar-in	intronic	29	0.18239	14	A	T	A	-0.66316	38.6089	5.17817e-10	3R	17405176	InR	InR-in	intronic	55	0.34375	22	C	T	C
2R	4056174	CG2183	CG2183:2	synonymous	62	0.3875	20	A	G	A	0.48294	38.5915	5.22454e-10	X	13309162	Set2	Set2:3	synonymous	81	0.48503	15	C	A	C
3R	27371446	nyo	nyo-in	intronic	46	0.282209	20	A	T	A	-0.53725	38.5912	5.2255e-10	3L	12733217	Ptp69D	Ptp69D:9	synonymous	66	0.4	17	A	G	A
3R	16036786	cic	-41706	intergenic	65	0.448276	11	G	C	G	0.5142	38.5893	5.23061e-10	2R	6706710	dgo	dgo-in	intronic	42	0.265823	11	A	G	A
3R	16036786	CG17199	1273	intergenic	65	0.448276	11	G	C	G	0.5142	38.5893	5.23061e-10	2R	6706710	dgo	dgo-in	intronic	42	0.265823	11	A	G	A
3R	16036786	CG34139	CG34139-in	intronic	65	0.448276	11	G	C	G	0.5142	38.5893	5.23061e-10	2R	6706710	dgo	dgo-in	intronic	42	0.265823	11	A	G	A
2L	1357289	CG31659	-1636	intergenic	31	0.19375	10	A	G	A	-0.60361	38.585	5.24202e-10	3R	16369807	Stat92E	Stat92E-in	intronic	59	0.359756	17	T	A	T
2L	1357289	CG5565	1365	intergenic	31	0.19375	10	A	G	A	-0.60361	38.585	5.24202e-10	3R	16369807	Stat92E	Stat92E-in	intronic	59	0.359756	17	T	A	T
2L	8166750	CG8486	CG8486-in	intronic	26	0.165605	17	C	T	C	-0.78063	38.5824	5.249e-10	2L	2949126	lilli	lilli:15	synonymous	36	0.227848	7	T	C	T
3L	19025241	nkd	nkd-in	intronic	38	0.234568	18	G	T	G	0.595	38.5736	5.27272e-10	3R	25289439	Ptp99A	Ptp99A-in	intronic	67	0.41358	14	T	C	T
3L	10469334	A2bp1	-5178	intergenic	43	0.275641	8	G	A	A	-0.61884	38.5703	5.2818e-10	2L	3943771	fred	fred-in	intronic	31	0.192547	11	T	A	T
3L	10469334	CG32063	7754	intergenic	43	0.275641	8	G	A	A	-0.61884	38.5703	5.2818e-10	2L	3943771	fred	fred-in	intronic	31	0.192547	11	T	A	T
X	10810416	CG11203	CG11203:6	synonymous	33	0.20122	14	C	T	C	0.6142	38.5597	5.31035e-10	2R	13720318	grh	grh-u5	UTR	63	0.388889	15	A	C	A
3L	770021	tRNA:CR32481	-342	intergenic	63	0.398734	6	C	T	T	0.4955	38.5498	5.33741e-10	X	7507408	ct	ct-in	intronic	67	0.401198	13	G	A	G
3L	770021	tRNA:CR32480	421	intergenic	63	0.398734	6	C	T	T	0.4955	38.5498	5.33741e-10	X	7507408	ct	ct-in	intronic	67	0.401198	13	G	A	G
3L	10043496	CG14160	-36351	intergenic	53	0.325153	12	G	A	A	0.55733	38.5492	5.33913e-10	2L	4071801	ed	ed-in	intronic	51	0.329032	14	C	A	C
3L	10043496	CG14160	-36351	intergenic	53	0.325153	12	G	A	A	0.55733	38.5492	5.33913e-10	2L	4071801	ed	ed-in	intronic	51	0.329032	14	C	A	C
3L	10043496	dpr6	9088	intergenic	53	0.325153	12	G	A	A	0.55733	38.5492	5.33913e-10	2L	4071801	ed	ed-in	intronic	51	0.329032	14	C	A	C
3L	10043496	dpr6	9088	intergenic	53	0.325153	12	G	A	A	0.55733	38.5492	5.33913e-10	2L	4071801	ed	ed-in	intronic	51	0.329032	14	C	A	C
3L	13045055	CG14115	-8567	intergenic	67	0.403614	18	A	G	A	-0.48321	38.542	5.35883e-10	2L	681915	ds	ds-in	intronic	77	0.472393	17	A	T	T
3L	13045055	CG14115	-8567	intergenic	67	0.403614	18	A	G	A	-0.48321	38.542	5.35883e-10	2L	681915	ds	ds-in	intronic	77	0.472393	17	A	T	T
3L	13045055	CG11279	4432	intergenic	67	0.403614	18	A	G	A	-0.48321	38.542	5.35883e-10	2L	681915	ds	ds-in	intronic	77	0.472393	17	A	T	T
3L	13045055	CG11279	4432	intergenic	67	0.403614	18	A	G	A	-0.48321	38.542	5.35883e-10	2L	681915	ds	ds-in	intronic	77	0.472393	17	A	T	T
2R	12501415	CG5065	CG5065-in	intronic	45	0.277778	18	A	G	G	-0.68562	38.538	5.36993e-10	2R	9783424	shot	shot-in	intronic	23	0.141975	16	C	A	C
2R	18729145	CG9826	CG9826:2	synonymous	51	0.309091	18	A	G	G	-0.56578	38.5377	5.37051e-10	2R	17433517	Egfr	Egfr-in	intronic	38	0.234568	13	T	C	T
2R	18729145	CG9826	CG9826:2	synonymous	51	0.309091	18	A	G	G	-0.56578	38.5377	5.37051e-10	2R	17433517	Egfr	Egfr-in	intronic	38	0.234568	13	T	C	T
2R	17002897	king-tubby	king-tubby-in	intronic	78	0.478528	15	C	G	G	-0.66474	38.5375	5.37126e-10	X	3035344	N	N-in	intronic	26	0.156627	8	C	T	C
2R	2686036	SdhB	-9081	intergenic	58	0.3625	20	T	C	T	0.52966	38.5185	5.42385e-10	2R	2025882	EcR	EcR-in	UTR	53	0.33758	12	G	A	G
2R	2686036	Cyp6a2	17076	intergenic	58	0.3625	20	T	C	T	0.52966	38.5185	5.42385e-10	2R	2025882	EcR	EcR-in	UTR	53	0.33758	12	G	A	G
3R	18436905	CG31159	-2581	intergenic	27	0.165644	20	A	C	A	-0.76291	38.514	5.43625e-10	3L	1467191	rho	rho-cds	synonymous	40	0.240964	14	G	A	A
3R	18436905	CG13843	468	intergenic	27	0.165644	20	A	C	A	-0.76291	38.514	5.43625e-10	3L	1467191	rho	rho-cds	synonymous	40	0.240964	14	G	A	A
3R	18436905	CG31156	CG31156:5	synonymous	27	0.165644	20	A	C	A	-0.76291	38.514	5.43625e-10	3L	1467191	rho	rho-cds	synonymous	40	0.240964	14	G	A	A
2R	8484282	Amph	Amph-in	intronic	58	0.353659	19	G	A	A	-0.50475	38.5121	5.4414e-10	3R	6382013	hth	hth-in	intronic	73	0.467949	11	C	G	C
3L	15388358	CG33259	-12591	intergenic	67	0.421384	14	C	T	T	0.49503	38.5107	5.44554e-10	3L	1793196	dlt	dlt-PA	synonymous	67	0.408537	21	T	A	T
3L	15388358	Toll-6	53047	intergenic	67	0.421384	14	C	T	T	0.49503	38.5107	5.44554e-10	3L	1793196	dlt	dlt-PA	synonymous	67	0.408537	21	T	A	T
X	586211	sdk	sdk-in	intronic	39	0.240741	9	T	C	T	0.63162	38.5106	5.44568e-10	2R	20235348	bs	bs-in	intronic	49	0.29697	20	C	A	C
3L	1855340	CG13936	CG13936-u5	intergenic	56	0.358974	10	C	A	C	0.60104	38.4758	5.54369e-10	2R	18049685	a	a-in	intronic	45	0.272727	14	C	G	C
2R	9599472	CG6280	-43377	intergenic	69	0.428571	11	A	C	A	-0.53361	38.473	5.55166e-10	2L	10834048	Nos	Nos-in	intronic	52	0.339869	8	C	A	C
2R	9599472	CG6280	-43377	intergenic	69	0.428571	11	A	C	A	-0.53361	38.473	5.55166e-10	2L	10834056	Nos	Nos-in	intronic	54	0.350649	9	A	C	A
2R	9599472	CG6220	18598	intergenic	69	0.428571	11	A	C	A	-0.53361	38.473	5.55166e-10	2L	10834048	Nos	Nos-in	intronic	52	0.339869	8	C	A	C
2R	9599472	CG6220	18598	intergenic	69	0.428571	11	A	C	A	-0.53361	38.473	5.55166e-10	2L	10834056	Nos	Nos-in	intronic	54	0.350649	9	A	C	A
2R	9599472	fas	fas-in	intronic	69	0.428571	11	A	C	A	-0.53361	38.473	5.55166e-10	2L	10834048	Nos	Nos-in	intronic	52	0.339869	8	C	A	C
2R	9599472	fas	fas-in	intronic	69	0.428571	11	A	C	A	-0.53361	38.473	5.55166e-10	2L	10834056	Nos	Nos-in	intronic	54	0.350649	9	A	C	A
3L	11700743	CG11658	CG11658-in	intronic	73	0.442424	11	C	T	T	-0.47975	38.4703	5.55924e-10	3L	2757068	Mrtf	Mrtf-in	intronic	66	0.392857	20	A	T	A
3R	21018939	CG13653	-2343	intergenic	22	0.131737	20	G	A	A	-0.67631	38.4636	5.5785e-10	3R	11865584	pnr	pnr-cds	synonymous	63	0.403846	11	A	T	A
3R	21018939	dan	411	intergenic	22	0.131737	20	G	A	A	-0.67631	38.4636	5.5785e-10	3R	11865584	pnr	pnr-cds	synonymous	63	0.403846	11	A	T	A
3R	21018939	CG34110	CG34110-in	intronic	22	0.131737	20	G	A	A	-0.67631	38.4636	5.5785e-10	3R	11865584	pnr	pnr-cds	synonymous	63	0.403846	11	A	T	A
2L	4252794	CG15425	-4778	intergenic	65	0.401235	21	G	C	C	-0.46541	38.4577	5.59547e-10	3R	9895681	foxo	foxo-in	intronic	67	0.424051	15	T	A	T
2L	4252794	RpL40	24231	intergenic	65	0.401235	21	G	C	C	-0.46541	38.4577	5.59547e-10	3R	9895681	foxo	foxo-in	intronic	67	0.424051	15	T	A	T
2R	13791546	PpY-55A	-51354	intergenic	21	0.127273	12	T	A	T	-0.77869	38.4572	5.59674e-10	3R	26631116	wts	wts-in	intronic	49	0.310127	10	A	G	A
2R	13791546	PpY-55A	-51354	intergenic	21	0.127273	12	T	A	T	-0.77869	38.4572	5.59674e-10	3R	26631116	wts	wts-in	intronic	49	0.310127	10	A	G	A
2R	13791546	CG14491	8463	intergenic	21	0.127273	12	T	A	T	-0.77869	38.4572	5.59674e-10	3R	26631116	wts	wts-in	intronic	49	0.310127	10	A	G	A
2R	13791546	CG14491	8463	intergenic	21	0.127273	12	T	A	T	-0.77869	38.4572	5.59674e-10	3R	26631116	wts	wts-in	intronic	49	0.310127	10	A	G	A
2R	13791546	elk	elk-in	intronic	21	0.127273	12	T	A	T	-0.77869	38.4572	5.59674e-10	3R	26631116	wts	wts-in	intronic	49	0.310127	10	A	G	A
2R	13791546	elk	elk-in	intronic	21	0.127273	12	T	A	T	-0.77869	38.4572	5.59674e-10	3R	26631116	wts	wts-in	intronic	49	0.310127	10	A	G	A
X	14381302	CG12540	-8868	intergenic	40	0.239521	10	A	T	A	-0.62647	38.4418	5.64114e-10	3R	25263568	Ptp99A	Ptp99A-in	intronic	55	0.34375	14	A	C	A
X	14381302	CG9411	7190	intergenic	40	0.239521	10	A	T	A	-0.62647	38.4418	5.64114e-10	3R	25263568	Ptp99A	Ptp99A-in	intronic	55	0.34375	14	A	C	A
X	17619124	CG42684	CG42684-in	intronic	38	0.227545	15	C	T	C	-0.57136	38.4388	5.64982e-10	X	16524230	rok	rok:5	missense	73	0.447853	12	G	A	A
2R	17815163	CG13488	-24033	intergenic	44	0.266667	12	T	A	T	0.6391	38.4343	5.66283e-10	2L	20790752	vari	vari-in	intronic	20	0.126582	18	C	G	C
2R	17815163	PpN58A	45125	intergenic	44	0.266667	12	T	A	T	0.6391	38.4343	5.66283e-10	2L	20790752	vari	vari-in	intronic	20	0.126582	18	C	G	C
2R	17815163	Fili	Fili-in	intronic	44	0.266667	12	T	A	T	0.6391	38.4343	5.66283e-10	2L	20790752	vari	vari-in	intronic	20	0.126582	18	C	G	C
2R	1969063	Ars2	Ars2-in	intronic	36	0.223602	19	T	C	T	0.62935	38.4182	5.70968e-10	3R	6347881	hth	hth-in	intronic	78	0.493671	15	T	C	T
2R	18729139	CG9826	CG9826:2	synonymous	54	0.335404	20	A	G	G	-0.54898	38.4036	5.75268e-10	2R	17433490	Egfr	Egfr-in	intronic	41	0.261146	13	T	C	T
2R	18729139	CG9826	CG9826:2	synonymous	54	0.335404	20	A	G	G	-0.54898	38.4036	5.75268e-10	2R	17433490	Egfr	Egfr-in	intronic	41	0.261146	13	T	C	T
3L	770021	tRNA:CR32481	-342	intergenic	63	0.398734	6	C	T	T	0.48175	38.395	5.77818e-10	X	7507429	ct	ct-in	intronic	66	0.39759	13	A	C	A
3L	770021	tRNA:CR32480	421	intergenic	63	0.398734	6	C	T	T	0.48175	38.395	5.77818e-10	X	7507429	ct	ct-in	intronic	66	0.39759	13	A	C	A
2R	9687876	Cpr50Cb	Cpr50Cb-in	intronic	50	0.308642	18	A	T	T	0.55506	38.3925	5.78549e-10	X	2857303	rst	rst-in	intronic	49	0.291667	11	C	A	C
3L	9550886	CG42673	CG42673-in	intronic	32	0.193939	17	A	C	A	0.55621	38.3878	5.79931e-10	3L	16018468	Notum	Notum-in	intronic	79	0.490683	15	T	G	T
2R	7153023	Cpr47Ee	Cpr47Ee-cds	missense	78	0.481481	14	G	C	G	0.5146	38.3856	5.80587e-10	X	2857210	rst	rst-in	intronic	53	0.315476	12	T	G	T
X	14033300	CG12479	-12312	intergenic	6	0.0472441	11	T	C	T	0.59732	38.3703	5.85163e-10	2R	10464566	ttv	ttv-in	intronic	66	0.4	10	G	T	G
X	14033300	tRNA:S7:12Eg	21457	intergenic	6	0.0472441	11	T	C	T	0.59732	38.3703	5.85163e-10	2R	10464566	ttv	ttv-in	intronic	66	0.4	10	G	T	G
3L	8319032	CG34461	CG34461-u5	UTR	64	0.383234	20	A	G	A	-0.56287	38.3585	5.88706e-10	3L	8461206	Gug	Gug-in	intronic	35	0.210843	22	T	G	G
3R	26186010	Fer1HCH	-25280	intergenic	76	0.47205	20	G	A	G	0.71005	38.3581	5.88823e-10	2R	13724833	grh	grh-in	intronic	14	0.0843373	16	T	A	T
3R	26186010	CG34300	53648	intergenic	76	0.47205	20	G	A	G	0.71005	38.3581	5.88823e-10	2R	13724833	grh	grh-in	intronic	14	0.0843373	16	T	A	T
3R	26186010	hdc	hdc-in	intronic	76	0.47205	20	G	A	G	0.71005	38.3581	5.88823e-10	2R	13724833	grh	grh-in	intronic	14	0.0843373	16	T	A	T
2R	13724833	grh	grh-in	intronic	14	0.0843373	16	T	A	T	0.71005	38.3581	5.88823e-10	3R	26186010	hdc	hdc-in	intronic	76	0.47205	20	G	A	G
2R	8306631	CG42782	CG42782-u3	intergenic	39	0.24375	7	A	T	A	-0.56118	38.3531	5.90338e-10	2L	10327106	RnrL	RnrL-PA	synonymous	78	0.484472	21	C	T	C
3L	11888119	CG11588	-26547	intergenic	32	0.195122	11	G	A	G	0.66929	38.3526	5.90494e-10	2L	7827587	mts	-156	intergenic	44	0.275	11	G	A	G
3L	11888119	CG5897	4347	intergenic	32	0.195122	11	G	A	G	0.66929	38.3526	5.90494e-10	2L	7827587	mts	-156	intergenic	44	0.275	11	G	A	G
3L	10288336	mir-276b	-24549	intergenic	62	0.427586	4	T	C	C	-0.53145	38.3222	5.99758e-10	2R	17426933	Egfr	Egfr-in	intronic	44	0.271605	11	T	C	T
3L	10288336	mir-276b	-24549	intergenic	62	0.427586	4	T	C	C	-0.53145	38.3222	5.99758e-10	2R	17426933	Egfr	Egfr-in	intronic	44	0.271605	11	T	C	T
3L	10288336	Or67d	20612	intergenic	62	0.427586	4	T	C	C	-0.53145	38.3222	5.99758e-10	2R	17426933	Egfr	Egfr-in	intronic	44	0.271605	11	T	C	T
3L	10288336	Or67d	20612	intergenic	62	0.427586	4	T	C	C	-0.53145	38.3222	5.99758e-10	2R	17426933	Egfr	Egfr-in	intronic	44	0.271605	11	T	C	T
X	6705221	pod1	pod1:16	missense	31	0.186747	14	T	G	T	-0.55918	38.3161	6.01635e-10	X	1545853	br	br-in	intronic	72	0.439024	14	G	A	G
2L	4742900	CG15630	CG15630-in	intronic	40	0.258065	15	C	G	C	-0.72422	38.3132	6.02528e-10	3L	15973486	brm	brm-in	missense	20	0.11976	25	A	T	A
3L	15262807	Best4	-29251	intergenic	76	0.475	17	C	G	C	0.56435	38.3102	6.03453e-10	3R	9886832	foxo	foxo-in	intronic	44	0.275	14	T	C	T
3L	15262807	Tollo	26875	intergenic	76	0.475	17	C	G	C	0.56435	38.3102	6.03453e-10	3R	9886832	foxo	foxo-in	intronic	44	0.275	14	T	C	T
2L	1356365	CG31659	-2560	intergenic	36	0.243243	11	G	A	G	-0.56516	38.306	6.04764e-10	3R	16369807	Stat92E	Stat92E-in	intronic	59	0.359756	17	T	A	T
2L	1356365	CG5565	441	intergenic	36	0.243243	11	G	A	G	-0.56516	38.306	6.04764e-10	3R	16369807	Stat92E	Stat92E-in	intronic	59	0.359756	17	T	A	T
3R	22005454	CG31323	CG31323-in	intronic	70	0.443038	14	G	A	G	0.55306	38.2987	6.07041e-10	3R	6413729	hth	hth-in	intronic	53	0.325153	14	G	A	G
2L	15508617	CG42448	-38902	intergenic	22	0.140127	14	C	T	C	0.7001	38.2941	6.08468e-10	2R	6401841	lola	lola-in	intronic	52	0.317073	15	A	G	A
2L	15508617	CG42448	-38902	intergenic	22	0.140127	14	C	T	C	0.7001	38.2941	6.08468e-10	2R	6401841	lola	lola-in	intronic	52	0.317073	15	A	G	A
2L	15508617	lace	3599	intergenic	22	0.140127	14	C	T	C	0.7001	38.2941	6.08468e-10	2R	6401841	lola	lola-in	intronic	52	0.317073	15	A	G	A
2L	15508617	lace	3599	intergenic	22	0.140127	14	C	T	C	0.7001	38.2941	6.08468e-10	2R	6401841	lola	lola-in	intronic	52	0.317073	15	A	G	A
X	8782714	Moe	Moe-in	intronic	37	0.221557	10	A	T	A	-0.62119	38.2923	6.09019e-10	2R	18049685	a	a-in	intronic	45	0.272727	14	C	G	C
2R	18049685	CG34206	-1587	intergenic	45	0.272727	14	C	G	C	-0.62119	38.2923	6.09019e-10	X	8782714	Moe	Moe-in	intronic	37	0.221557	10	A	T	A
2R	18049685	gom	20843	intergenic	45	0.272727	14	C	G	C	-0.62119	38.2923	6.09019e-10	X	8782714	Moe	Moe-in	intronic	37	0.221557	10	A	T	A
2R	18049685	a	a-in	intronic	45	0.272727	14	C	G	C	-0.62119	38.2923	6.09019e-10	X	8782714	Moe	Moe-in	intronic	37	0.221557	10	A	T	A
2L	6276998	CG13984	-31821	intergenic	61	0.393548	10	C	T	C	0.49667	38.2894	6.09934e-10	2L	4081039	ed	ed-in	intronic	33	0.232394	10	A	C	C
2L	6276998	CG13984	-31821	intergenic	61	0.393548	10	C	T	C	0.49667	38.2894	6.09934e-10	2L	4081039	ed	ed-in	intronic	33	0.232394	10	A	C	C
2L	6276998	CG42735	5487	intergenic	61	0.393548	10	C	T	C	0.49667	38.2894	6.09934e-10	2L	4081039	ed	ed-in	intronic	33	0.232394	10	A	C	C
2L	6276998	CG42735	5487	intergenic	61	0.393548	10	C	T	C	0.49667	38.2894	6.09934e-10	2L	4081039	ed	ed-in	intronic	33	0.232394	10	A	C	C
2L	6276998	Ddr	Ddr-in	intronic	61	0.393548	10	C	T	C	0.49667	38.2894	6.09934e-10	2L	4081039	ed	ed-in	intronic	33	0.232394	10	A	C	C
2L	6276998	Ddr	Ddr-in	intronic	61	0.393548	10	C	T	C	0.49667	38.2894	6.09934e-10	2L	4081039	ed	ed-in	intronic	33	0.232394	10	A	C	C
X	10417519	spri	spri-cds	synonymous	27	0.162651	12	C	G	G	0.84338	38.2892	6.09982e-10	X	7513183	ct	ct-in	intronic	21	0.126506	9	C	T	C
3R	8736972	CG10909	CG10909-u5	UTR	61	0.38125	10	T	C	C	0.5234	38.2842	6.11567e-10	3L	16625176	Abl	Abl-in	intronic	58	0.3625	12	T	C	T
2R	18729139	CG9826	CG9826:2	synonymous	54	0.335404	20	A	G	G	-0.54506	38.2756	6.14274e-10	2R	17433519	Egfr	Egfr-in	intronic	39	0.239264	13	T	C	T
2R	18729139	CG9826	CG9826:2	synonymous	54	0.335404	20	A	G	G	-0.54506	38.2756	6.14274e-10	2R	17433519	Egfr	Egfr-in	intronic	39	0.239264	13	T	C	T
X	3413096	CG32792	-38749	intergenic	35	0.213415	10	T	G	T	0.65783	38.2709	6.15743e-10	2R	7411535	en	en-u3	UTR	39	0.236364	12	C	G	C
X	3413096	CG13021	3003	intergenic	35	0.213415	10	T	G	T	0.65783	38.2709	6.15743e-10	2R	7411535	en	en-u3	UTR	39	0.236364	12	C	G	C
X	3413096	CG32791	CG32791-in	intronic	35	0.213415	10	T	G	T	0.65783	38.2709	6.15743e-10	2R	7411535	en	en-u3	UTR	39	0.236364	12	C	G	C
X	19564414	Zw	Zw-in	intronic	32	0.191617	13	G	A	G	0.67806	38.2691	6.16305e-10	3R	17899840	how	how-in	UTR	53	0.325153	13	C	T	C
X	14033299	CG12479	-12313	intergenic	36	0.223602	11	T	A	T	0.57566	38.2622	6.18493e-10	2R	10464566	ttv	ttv-in	intronic	66	0.4	10	G	T	G
X	14033299	tRNA:S7:12Eg	21456	intergenic	36	0.223602	11	T	A	T	0.57566	38.2622	6.18493e-10	2R	10464566	ttv	ttv-in	intronic	66	0.4	10	G	T	G
2R	9490425	CG34236	-1654	intergenic	22	0.134146	14	G	A	G	0.7249	38.259	6.19506e-10	X	2000142	csw	csw-in	intronic	53	0.317365	16	G	A	G
2R	9490425	CG43058	1908	intergenic	22	0.134146	14	G	A	G	0.7249	38.259	6.19506e-10	X	2000142	csw	csw-in	intronic	53	0.317365	16	G	A	G
X	6477557	CG34417	CG34417-u3	UTR	59	0.353293	13	A	T	A	0.68399	38.2534	6.21283e-10	3L	14350101	fz	fz-in	intronic	22	0.135802	16	T	C	C
2R	12501492	CG5065	CG5065-in	intronic	39	0.237805	14	G	A	A	-0.69331	38.2422	6.24874e-10	2R	9783424	shot	shot-in	intronic	23	0.141975	16	C	A	C
2R	12695755	CG5550	-8341	intergenic	58	0.374194	9	G	T	T	-0.50454	38.2321	6.28119e-10	3L	8832026	dally	dally-in	intronic	64	0.387879	15	A	G	G
2R	12695755	CG15615	11843	intergenic	58	0.374194	9	G	T	T	-0.50454	38.2321	6.28119e-10	3L	8832026	dally	dally-in	intronic	64	0.387879	15	A	G	G
3R	23593000	CG34353	-688	intergenic	38	0.233129	22	T	A	T	0.65305	38.2285	6.29272e-10	X	4333745	bi	bi-in	intronic	30	0.180723	13	A	T	T
3R	23593000	Ets98B	18911	intergenic	38	0.233129	22	T	A	T	0.65305	38.2285	6.29272e-10	X	4333745	bi	bi-in	intronic	30	0.180723	13	A	T	T
2L	4205011	ft	ft:7	synonymous	54	0.339623	18	C	G	G	0.62852	38.2041	6.37197e-10	3R	5965708	tws	216	intergenic	36	0.233766	9	A	T	A
3L	4357302	Cip4	Cip4-in	intronic	74	0.445783	17	C	G	G	-0.49261	38.1999	6.38568e-10	2L	229849	kis	kis-in	intronic	59	0.36646	12	C	T	T
3L	7407185	CG42458	-9742	intergenic	20	0.125	20	G	A	A	0.72658	38.1823	6.44359e-10	3R	26178723	hdc	hdc-in	intronic	37	0.23125	13	C	A	C
3L	7407185	pncr015:3L	7466	intergenic	20	0.125	20	G	A	A	0.72658	38.1823	6.44359e-10	3R	26178723	hdc	hdc-in	intronic	37	0.23125	13	C	A	C
2R	15065766	hppy	-493	intergenic	44	0.278481	10	A	T	A	-0.54985	38.179	6.45443e-10	2R	6393891	lola	lola-in	intronic	63	0.396226	13	A	G	G
2R	15065766	hppy	-493	intergenic	44	0.278481	10	A	T	A	-0.54985	38.179	6.45443e-10	2R	6393891	lola	lola-in	intronic	63	0.396226	13	A	G	G
2R	15065766	CG10737	38	intergenic	44	0.278481	10	A	T	A	-0.54985	38.179	6.45443e-10	2R	6393891	lola	lola-in	intronic	63	0.396226	13	A	G	G
2R	15065766	CG10737	38	intergenic	44	0.278481	10	A	T	A	-0.54985	38.179	6.45443e-10	2R	6393891	lola	lola-in	intronic	63	0.396226	13	A	G	G
3L	15388354	CG33259	-12595	intergenic	66	0.417722	15	G	C	C	0.48618	38.1698	6.4847e-10	3L	1793196	dlt	dlt-PA	synonymous	67	0.408537	21	T	A	T
3L	15388354	Toll-6	53043	intergenic	66	0.417722	15	G	C	C	0.48618	38.1698	6.4847e-10	3L	1793196	dlt	dlt-PA	synonymous	67	0.408537	21	T	A	T
2R	10834948	aPKC	aPKC-in	intronic	58	0.369427	17	T	G	T	-0.50545	38.1649	6.5011e-10	3L	3361114	kst	kst:14	synonymous	60	0.359281	18	C	A	A
2L	6565476	CG13766	CG13766-PA	synonymous	73	0.459119	16	G	T	T	0.58298	38.1408	6.58201e-10	2R	17429188	Egfr	Egfr-in	intronic	33	0.20122	15	C	T	C
2L	6565476	CG13766	CG13766-PA	synonymous	73	0.459119	16	G	T	T	0.58298	38.1408	6.58201e-10	2R	17429188	Egfr	Egfr-in	intronic	33	0.20122	15	C	T	C
2L	2025107	tRNA:G3:22BCb	-6585	intergenic	76	0.484076	17	A	C	A	-0.46987	38.1408	6.58206e-10	3R	20476163	ash2	ash2:4	synonymous	70	0.4375	18	T	G	G
2L	2025107	tRNA:CR31669	11857	intergenic	76	0.484076	17	A	C	A	-0.46987	38.1408	6.58206e-10	3R	20476163	ash2	ash2:4	synonymous	70	0.4375	18	T	G	G
2L	2025107	CG4238	CG4238-in	intronic	76	0.484076	17	A	C	A	-0.46987	38.1408	6.58206e-10	3R	20476163	ash2	ash2:4	synonymous	70	0.4375	18	T	G	G
X	3528312	AlstR	AlstR-in	intronic	64	0.387879	10	C	T	C	0.52195	38.1367	6.59573e-10	3L	13237485	caps	caps-in	intronic	49	0.304348	12	A	G	A
2R	14576765	CG42856	CG42856-in	intronic	46	0.282209	22	C	G	C	0.72949	38.1283	6.62429e-10	2R	13724833	grh	grh-in	intronic	14	0.0843373	16	T	A	T
X	1611956	Scgdelta	-27953	intergenic	63	0.377246	14	T	C	T	-0.62779	38.1177	6.66029e-10	3L	8442840	Gug	-182	intergenic	25	0.15625	7	T	G	T
X	1611956	CG3795	7760	intergenic	63	0.377246	14	T	C	T	-0.62779	38.1177	6.66029e-10	3L	8442840	Gug	-182	intergenic	25	0.15625	7	T	G	T
3L	6610414	CG8398	CG8398:5	missense	70	0.429448	15	T	G	T	0.48719	38.1035	6.70899e-10	3R	11860240	pnr	pnr-u5	UTR	65	0.414013	9	C	T	C
3L	12597716	caup	-5510	intergenic	50	0.299401	18	G	A	G	0.48747	38.1	6.72086e-10	X	4373906	bi	bi-in	intronic	79	0.473054	14	T	C	T
3L	12597716	ara	8598	intergenic	50	0.299401	18	G	A	G	0.48747	38.1	6.72086e-10	X	4373906	bi	bi-in	intronic	79	0.473054	14	T	C	T
X	1611956	Scgdelta	-27953	intergenic	63	0.377246	14	T	C	T	-0.65096	38.0987	6.72555e-10	3L	8442896	Gug	-126	intergenic	27	0.164634	9	C	T	C
X	1611956	CG3795	7760	intergenic	63	0.377246	14	T	C	T	-0.65096	38.0987	6.72555e-10	3L	8442896	Gug	-126	intergenic	27	0.164634	9	C	T	C
X	10088597	CR32690	-9836	intergenic	43	0.265432	8	T	A	T	0.60264	38.0815	6.78506e-10	3L	8878860	dally	dally-in	intronic	47	0.281437	11	A	G	A
X	10088597	CG15311	1645	intergenic	43	0.265432	8	T	A	T	0.60264	38.0815	6.78506e-10	3L	8878860	dally	dally-in	intronic	47	0.281437	11	A	G	A
X	21364591	Cyp6t1	-23870	intergenic	33	0.197605	9	T	A	A	-0.637	38.0808	6.78756e-10	2R	9920759	mam	mam-in	intronic	49	0.326667	11	A	T	T
X	21364591	Ir20a	14619	intergenic	33	0.197605	9	T	A	A	-0.637	38.0808	6.78756e-10	2R	9920759	mam	mam-in	intronic	49	0.326667	11	A	T	T
X	12392817	CG42251	-20195	intergenic	65	0.448276	5	T	A	T	-0.71344	38.0779	6.79756e-10	3R	6450794	hth	hth-in	intronic	18	0.111111	13	C	T	T
X	12392817	snoRNA:Me18S-G894	976	intergenic	65	0.448276	5	T	A	T	-0.71344	38.0779	6.79756e-10	3R	6450794	hth	hth-in	intronic	18	0.111111	13	C	T	T
X	12392817	CG2556	CG2556-in	intronic	65	0.448276	5	T	A	T	-0.71344	38.0779	6.79756e-10	3R	6450794	hth	hth-in	intronic	18	0.111111	13	C	T	T
2L	9338082	Eaat1	Eaat1-u5	UTR	77	0.478261	17	A	G	G	-0.48862	38.0747	6.80878e-10	2R	13307311	cnk	207	intergenic	68	0.417178	10	G	A	G
X	8535968	oc	oc-in	intronic	57	0.351852	6	G	T	G	-0.551	38.0713	6.82067e-10	3L	8454543	Gug	Gug-in	intronic	41	0.25	12	A	G	A
2L	4933969	hoe2	hoe2-in	intronic	57	0.354037	21	T	G	G	0.53999	38.0653	6.84153e-10	3L	18175554	W	W-in	intronic	40	0.253165	20	T	A	T
3L	3787203	CG32266	-3601	intergenic	47	0.288344	12	T	G	T	0.55516	38.0622	6.85249e-10	2L	12544560	bun	bun-in	intronic	56	0.358974	17	C	A	A
3L	3787203	CG32266	-3601	intergenic	47	0.288344	12	T	G	T	0.55516	38.0622	6.85249e-10	2L	12544560	bun	bun-in	intronic	56	0.358974	17	C	A	A
3L	3787203	CG10858	32002	intergenic	47	0.288344	12	T	G	T	0.55516	38.0622	6.85249e-10	2L	12544560	bun	bun-in	intronic	56	0.358974	17	C	A	A
3L	3787203	CG10858	32002	intergenic	47	0.288344	12	T	G	T	0.55516	38.0622	6.85249e-10	2L	12544560	bun	bun-in	intronic	56	0.358974	17	C	A	A
3L	3787203	CG32264	CG32264-in	intronic	47	0.288344	12	T	G	T	0.55516	38.0622	6.85249e-10	2L	12544560	bun	bun-in	intronic	56	0.358974	17	C	A	A
3L	3787203	CG32264	CG32264-in	intronic	47	0.288344	12	T	G	T	0.55516	38.0622	6.85249e-10	2L	12544560	bun	bun-in	intronic	56	0.358974	17	C	A	A
2R	9599472	CG6280	-43377	intergenic	69	0.428571	11	A	C	A	-0.52878	38.0607	6.8576e-10	2L	10834044	Nos	Nos-in	intronic	52	0.339869	9	A	G	A
2R	9599472	CG6220	18598	intergenic	69	0.428571	11	A	C	A	-0.52878	38.0607	6.8576e-10	2L	10834044	Nos	Nos-in	intronic	52	0.339869	9	A	G	A
2R	9599472	fas	fas-in	intronic	69	0.428571	11	A	C	A	-0.52878	38.0607	6.8576e-10	2L	10834044	Nos	Nos-in	intronic	52	0.339869	9	A	G	A
3R	21380036	msi	msi-in	intronic	75	0.462963	16	C	T	C	-0.67387	38.0579	6.86754e-10	2R	18266315	Rtf1	963	intergenic	32	0.192771	19	A	T	A
X	954636	CG3655	-13295	intergenic	34	0.202381	10	T	C	T	0.6672	38.0561	6.87407e-10	3L	9638058	fry	fry-in	synonymous	82	0.49697	25	T	C	T
X	954636	CG14629	7972	intergenic	34	0.202381	10	T	C	T	0.6672	38.0561	6.87407e-10	3L	9638058	fry	fry-in	synonymous	82	0.49697	25	T	C	T
3R	6333852	hth	-1717	intergenic	36	0.227848	13	C	T	T	0.64739	38.0526	6.88626e-10	2L	1674621	chinmo	chinmo-in	intronic	53	0.335443	10	T	C	C
3R	6333852	Cyp12e1	71426	intergenic	36	0.227848	13	C	T	T	0.64739	38.0526	6.88626e-10	2L	1674621	chinmo	chinmo-in	intronic	53	0.335443	10	T	C	C
2L	8045455	CG7466	CG7466:3	synonymous	58	0.367089	17	G	A	A	0.58194	38.0509	6.89232e-10	3L	12248654	app	app-in	intronic	53	0.323171	11	T	A	T
3R	15582080	GluClalpha	GluClalpha-in	intronic	69	0.428571	15	A	T	T	-0.52957	38.0493	6.89797e-10	3L	3846306	Awh	Awh-u5	UTR	45	0.277778	16	G	C	C
3R	19067397	CG4467	CG4467-in	intronic	20	0.133333	15	C	T	C	0.60184	38.0475	6.90436e-10	X	674767	fz3	fz3-in	intronic	52	0.315152	15	G	T	G
X	8390808	CG33181	CG33181-in	intronic	30	0.179641	14	A	G	A	0.63132	38.0222	6.99438e-10	3R	25291093	Ptp99A	Ptp99A-in	intronic	39	0.237805	21	A	T	A
3R	25793987	Takr99D	Takr99D-in	intronic	37	0.229814	10	A	G	A	0.59476	38.0187	7.00682e-10	3L	8557202	rhea	rhea-in	intronic	55	0.329341	18	T	A	T
2L	19215837	CG31797	-43690	intergenic	61	0.388535	11	G	C	C	-0.66618	38.013	7.0273e-10	2L	4371369	Traf4	Traf4-in	intronic	26	0.166667	9	C	A	C
2L	19215837	drl	7222	intergenic	61	0.388535	11	G	C	C	-0.66618	38.013	7.0273e-10	2L	4371369	Traf4	Traf4-in	intronic	26	0.166667	9	C	A	C
3L	5167628	shep	shep-in	intronic	80	0.490798	12	G	A	G	-0.69108	38.0073	7.04807e-10	3L	2765774	Mrtf	Mrtf-in	intronic	21	0.127273	10	T	G	T
3L	6931404	tow	-4652	intergenic	24	0.148148	15	G	A	G	-0.69859	38.0056	7.05416e-10	2L	13529927	B4	B4-in	intronic	40	0.254777	12	C	T	C
3L	6931404	CG14820	3465	intergenic	24	0.148148	15	G	A	G	-0.69859	38.0056	7.05416e-10	2L	13529927	B4	B4-in	intronic	40	0.254777	12	C	T	C
3L	18647712	MYPT-75D	MYPT-75D-in	intronic	38	0.233129	11	T	A	T	0.71711	38.0029	7.06412e-10	3L	14349999	fz	fz-in	intronic	22	0.144737	10	C	T	T
3L	18647712	MYPT-75D	MYPT-75D-in	intronic	38	0.233129	11	T	A	T	0.71711	38.0029	7.06412e-10	3L	14350000	fz	fz-in	intronic	22	0.144737	10	A	G	G
3L	18647712	MYPT-75D	MYPT-75D-in	intronic	38	0.233129	11	T	A	T	0.71711	38.0029	7.06412e-10	3L	14349959	fz	fz-in	intronic	22	0.141935	9	A	T	T
3R	21833465	malpha	-3150	intergenic	57	0.354037	9	C	T	C	-0.49989	37.9798	7.14792e-10	X	15511759	sog	sog-in	intronic	65	0.389222	14	T	C	C
3R	21833465	HLHmbeta	1720	intergenic	57	0.354037	9	C	T	C	-0.49989	37.9798	7.14792e-10	X	15511759	sog	sog-in	intronic	65	0.389222	14	T	C	C
2R	8737933	CG17574	CG17574-in	intronic	47	0.303226	8	C	A	A	0.57067	37.9702	7.18339e-10	3L	8461781	Gug	Gug:10	synonymous	40	0.240964	17	C	T	C
2R	20052668	CG3328	CG3328-in	intronic	79	0.496855	12	A	G	A	-0.57913	37.9672	7.19424e-10	3R	25242858	Ptp99A	Ptp99A-in	intronic	32	0.193939	17	G	A	G
X	8777741	Moe	Moe-in	intronic	67	0.406061	11	A	G	A	-0.67671	37.9648	7.2031e-10	2L	700068	ds	ds-in	intronic	23	0.141104	17	C	T	T
X	8777741	Moe	Moe-in	intronic	67	0.406061	11	A	G	A	-0.67671	37.9648	7.2031e-10	2L	700068	ds	ds-in	intronic	23	0.141104	17	C	T	T
2L	700068	ds	ds-in	intronic	23	0.141104	17	C	T	T	-0.67671	37.9648	7.2031e-10	X	8777741	Moe	Moe-in	intronic	67	0.406061	11	A	G	A
3R	24275701	beat-VI	beat-VI-in	intronic	60	0.379747	20	G	A	A	-0.68728	37.9626	7.21152e-10	2R	13724833	grh	grh-in	intronic	14	0.0843373	16	T	A	T
2R	9481474	CG6197	CG6197:2	synonymous	37	0.232704	23	T	C	T	0.74885	37.9494	7.26032e-10	2R	13724833	grh	grh-in	intronic	14	0.0843373	16	T	A	T
2L	3882300	capu	capu-in	intronic	29	0.175758	16	A	G	A	0.78347	37.9465	7.27124e-10	2L	4365246	Traf4	Traf4-in	intronic	20	0.119048	20	A	T	A
X	6439482	CG34417	CG34417-in	intronic	40	0.239521	13	C	A	C	0.63545	37.9461	7.27278e-10	2L	12542131	bun	bun-in	intronic	36	0.225	10	A	C	A
X	6439482	CG34417	CG34417-in	intronic	40	0.239521	13	C	A	C	0.63545	37.9461	7.27278e-10	2L	12542131	bun	bun-in	intronic	36	0.225	10	A	C	A
2R	13701189	grh	grh-in	intronic	55	0.337423	10	C	T	C	0.67455	37.9374	7.30493e-10	2R	13724209	grh	grh-in	intronic	19	0.119497	13	T	A	T
2R	13724209	grh	grh-in	intronic	19	0.119497	13	T	A	T	0.67455	37.9374	7.30493e-10	2R	13701189	grh	grh-in	intronic	55	0.337423	10	C	T	C
2R	8300064	Cpr49Ah	-1403	intergenic	45	0.272727	15	C	T	T	-0.55958	37.937	7.30652e-10	2R	6377304	lola	lola:5	missense	62	0.385093	15	G	A	A
2R	8300064	Cpr49Ah	-1403	intergenic	45	0.272727	15	C	T	T	-0.55958	37.937	7.30652e-10	2R	6377304	lola	lola:5	missense	62	0.385093	15	G	A	A
2R	8300064	CG33627	881	intergenic	45	0.272727	15	C	T	T	-0.55958	37.937	7.30652e-10	2R	6377304	lola	lola:5	missense	62	0.385093	15	G	A	A
2R	8300064	CG33627	881	intergenic	45	0.272727	15	C	T	T	-0.55958	37.937	7.30652e-10	2R	6377304	lola	lola:5	missense	62	0.385093	15	G	A	A
2R	13806982	PpY-55A	-35918	intergenic	27	0.16875	8	A	G	G	0.68533	37.9185	7.37616e-10	2R	13704241	grh	grh-in	intronic	56	0.352201	14	C	A	A
2R	13806982	CG14491	23899	intergenic	27	0.16875	8	A	G	G	0.68533	37.9185	7.37616e-10	2R	13704241	grh	grh-in	intronic	56	0.352201	14	C	A	A
2R	13806982	elk	elk-in	intronic	27	0.16875	8	A	G	G	0.68533	37.9185	7.37616e-10	2R	13704241	grh	grh-in	intronic	56	0.352201	14	C	A	A
2R	8300062	Cpr49Ah	-1405	intergenic	45	0.271084	15	G	T	T	-0.56138	37.9149	7.38978e-10	2R	6377304	lola	lola:5	missense	62	0.385093	15	G	A	A
2R	8300062	Cpr49Ah	-1405	intergenic	45	0.271084	15	G	T	T	-0.56138	37.9149	7.38978e-10	2R	6377304	lola	lola:5	missense	62	0.385093	15	G	A	A
2R	8300062	CG33627	879	intergenic	45	0.271084	15	G	T	T	-0.56138	37.9149	7.38978e-10	2R	6377304	lola	lola:5	missense	62	0.385093	15	G	A	A
2R	8300062	CG33627	879	intergenic	45	0.271084	15	G	T	T	-0.56138	37.9149	7.38978e-10	2R	6377304	lola	lola:5	missense	62	0.385093	15	G	A	A
2L	17038744	CG15136	-8417	intergenic	56	0.358974	12	T	A	T	0.5315	37.9033	7.43388e-10	3R	15129759	Dl	Dl-u3	UTR	48	0.301887	13	A	C	A
2L	17038744	CG6304	25690	intergenic	56	0.358974	12	T	A	T	0.5315	37.9033	7.43388e-10	3R	15129759	Dl	Dl-u3	UTR	48	0.301887	13	A	C	A
2R	19912282	Adk2	Adk2-in	intronic	66	0.402439	17	T	C	T	0.5376	37.901	7.44286e-10	2L	1674577	chinmo	chinmo-in	intronic	50	0.314465	11	T	A	A
3R	15173720	CG42793	-6053	intergenic	55	0.341615	12	A	G	A	-0.61704	37.8909	7.4813e-10	3L	16023372	Notum	Notum-in	intronic	33	0.20122	20	T	C	T
3R	15173720	mir-997	20830	intergenic	55	0.341615	12	A	G	A	-0.61704	37.8909	7.4813e-10	3L	16023372	Notum	Notum-in	intronic	33	0.20122	20	T	C	T
3L	3787203	CG32266	-3601	intergenic	47	0.288344	12	T	G	T	0.55389	37.8897	7.48595e-10	2L	12544686	bun	bun-in	intronic	57	0.363057	19	A	T	T
3L	3787203	CG32266	-3601	intergenic	47	0.288344	12	T	G	T	0.55389	37.8897	7.48595e-10	2L	12544686	bun	bun-in	intronic	57	0.363057	19	A	T	T
3L	3787203	CG10858	32002	intergenic	47	0.288344	12	T	G	T	0.55389	37.8897	7.48595e-10	2L	12544686	bun	bun-in	intronic	57	0.363057	19	A	T	T
3L	3787203	CG10858	32002	intergenic	47	0.288344	12	T	G	T	0.55389	37.8897	7.48595e-10	2L	12544686	bun	bun-in	intronic	57	0.363057	19	A	T	T
3L	3787203	CG32264	CG32264-in	intronic	47	0.288344	12	T	G	T	0.55389	37.8897	7.48595e-10	2L	12544686	bun	bun-in	intronic	57	0.363057	19	A	T	T
3L	3787203	CG32264	CG32264-in	intronic	47	0.288344	12	T	G	T	0.55389	37.8897	7.48595e-10	2L	12544686	bun	bun-in	intronic	57	0.363057	19	A	T	T
X	18214733	CG6023	CG6023-in	intronic	1	0.00632911	9	C	T	C	0.65921	37.87	7.56207e-10	3L	13224725	caps	caps-in	intronic	43	0.260606	13	A	G	A
X	4562038	rap	rap-PB	synonymous	54	0.323353	12	G	T	G	-0.66842	37.8612	7.59611e-10	X	2860065	rst	rst-u5	UTR	30	0.180723	11	C	T	T
2L	5493089	CG14020	-24734	intergenic	39	0.246835	16	A	C	A	0.75932	37.8593	7.60353e-10	2L	715762	ds	794	intergenic	8	0.0481928	11	C	T	C
2L	5493089	CG14020	-24734	intergenic	39	0.246835	16	A	C	A	0.75932	37.8593	7.60353e-10	2L	715762	ds	794	intergenic	8	0.0481928	11	C	T	C
2L	5493089	mid	25480	intergenic	39	0.246835	16	A	C	A	0.75932	37.8593	7.60353e-10	2L	715762	ds	794	intergenic	8	0.0481928	11	C	T	C
2L	5493089	mid	25480	intergenic	39	0.246835	16	A	C	A	0.75932	37.8593	7.60353e-10	2L	715762	ds	794	intergenic	8	0.0481928	11	C	T	C
3L	5167628	shep	shep-in	intronic	80	0.490798	12	G	A	G	-0.6925	37.8434	7.66564e-10	3L	2765842	Mrtf	Mrtf-in	intronic	18	0.109756	10	C	A	C
3L	3787203	CG32266	-3601	intergenic	47	0.288344	12	T	G	T	0.55555	37.8318	7.71136e-10	2L	12544685	bun	bun-in	intronic	57	0.363057	18	C	A	A
3L	3787203	CG32266	-3601	intergenic	47	0.288344	12	T	G	T	0.55555	37.8318	7.71136e-10	2L	12544685	bun	bun-in	intronic	57	0.363057	18	C	A	A
3L	3787203	CG10858	32002	intergenic	47	0.288344	12	T	G	T	0.55555	37.8318	7.71136e-10	2L	12544685	bun	bun-in	intronic	57	0.363057	18	C	A	A
3L	3787203	CG10858	32002	intergenic	47	0.288344	12	T	G	T	0.55555	37.8318	7.71136e-10	2L	12544685	bun	bun-in	intronic	57	0.363057	18	C	A	A
3L	3787203	CG32264	CG32264-in	intronic	47	0.288344	12	T	G	T	0.55555	37.8318	7.71136e-10	2L	12544685	bun	bun-in	intronic	57	0.363057	18	C	A	A
3L	3787203	CG32264	CG32264-in	intronic	47	0.288344	12	T	G	T	0.55555	37.8318	7.71136e-10	2L	12544685	bun	bun-in	intronic	57	0.363057	18	C	A	A
X	4010923	Tip60	Tip60-u5	UTR	75	0.451807	12	G	A	G	-0.48947	37.8307	7.71586e-10	2R	9342493	arr	arr-PA	synonymous	77	0.475309	21	G	A	G
3L	11679252	Sug	Sug:2	synonymous	83	0.5	13	T	C	T	0.62298	37.8296	7.72032e-10	3L	8444536	Gug	Gug-in	intronic	16	0.107383	9	G	A	G
X	11630586	m	-17720	intergenic	21	0.126506	17	T	A	T	-0.68003	37.8205	7.75638e-10	2L	2177756	aop	aop-in	intronic	52	0.317073	18	T	A	T
X	11630586	inaF-C	4788	intergenic	21	0.126506	17	T	A	T	-0.68003	37.8205	7.75638e-10	2L	2177756	aop	aop-in	intronic	52	0.317073	18	T	A	T
X	11630586	CG15221	CG15221-u3	UTR	21	0.126506	17	T	A	T	-0.68003	37.8205	7.75638e-10	2L	2177756	aop	aop-in	intronic	52	0.317073	18	T	A	T
X	1621505	Scgdelta	-18404	intergenic	36	0.215569	13	T	A	T	-0.58657	37.8169	7.77048e-10	2R	18039441	a	a-in	intronic	52	0.33121	17	T	C	T
X	1621505	CG3795	17309	intergenic	36	0.215569	13	T	A	T	-0.58657	37.8169	7.77048e-10	2R	18039441	a	a-in	intronic	52	0.33121	17	T	C	T
2R	5982847	Jra	-1138	intergenic	42	0.254545	12	T	C	C	0.60232	37.8136	7.78359e-10	2R	3050836	pk	pk-in	intronic	66	0.4125	13	G	C	C
2R	5982847	sut4	8279	intergenic	42	0.254545	12	T	C	C	0.60232	37.8136	7.78359e-10	2R	3050836	pk	pk-in	intronic	66	0.4125	13	G	C	C
2R	5982847	CG2269	CG2269-u3	UTR	42	0.254545	12	T	C	C	0.60232	37.8136	7.78359e-10	2R	3050836	pk	pk-in	intronic	66	0.4125	13	G	C	C
2R	6336531	G-oalpha47A	G-oalpha47A-in	intronic	52	0.335484	9	C	T	C	-0.50792	37.8088	7.80302e-10	2R	9746360	tum	138	intergenic	45	0.308219	7	A	T	T
3R	27531677	CG42693	-1915	intergenic	65	0.408805	17	T	C	C	-0.5825	37.8082	7.80513e-10	3L	5800203	S6k	S6k-in	intronic	31	0.186747	20	C	T	C
3R	27531677	CG42693	-1915	intergenic	65	0.408805	17	T	C	C	-0.5825	37.8082	7.80513e-10	3L	5800191	S6k	S6k-in	intronic	32	0.191617	22	A	G	A
3R	27531677	CG42693	-1915	intergenic	65	0.408805	17	T	C	C	-0.5825	37.8082	7.80513e-10	3L	5800203	S6k	S6k-in	intronic	31	0.186747	20	C	T	C
3R	27531677	CG42693	-1915	intergenic	65	0.408805	17	T	C	C	-0.5825	37.8082	7.80513e-10	3L	5800191	S6k	S6k-in	intronic	32	0.191617	22	A	G	A
3R	27531677	CG11550	26075	intergenic	65	0.408805	17	T	C	C	-0.5825	37.8082	7.80513e-10	3L	5800203	S6k	S6k-in	intronic	31	0.186747	20	C	T	C
3R	27531677	CG11550	26075	intergenic	65	0.408805	17	T	C	C	-0.5825	37.8082	7.80513e-10	3L	5800191	S6k	S6k-in	intronic	32	0.191617	22	A	G	A
3R	27531677	CG11550	26075	intergenic	65	0.408805	17	T	C	C	-0.5825	37.8082	7.80513e-10	3L	5800203	S6k	S6k-in	intronic	31	0.186747	20	C	T	C
3R	27531677	CG11550	26075	intergenic	65	0.408805	17	T	C	C	-0.5825	37.8082	7.80513e-10	3L	5800191	S6k	S6k-in	intronic	32	0.191617	22	A	G	A
2R	9869442	CG13350	CG13350-PA	missense	40	0.245399	19	G	A	G	0.55921	37.8049	7.81846e-10	3L	12225620	app	app-in	intronic	55	0.329341	13	G	A	G
3L	11695523	CG11658	CG11658-in	intronic	47	0.290123	9	C	A	C	0.51498	37.7963	7.85295e-10	3L	1464159	rho	rho-in	intronic	73	0.439759	17	C	T	C
X	6450281	CG34417	CG34417:8	synonymous	66	0.39521	15	G	C	C	0.55266	37.7908	7.87527e-10	2L	1060582	S	S-in	intronic	41	0.254658	12	A	G	A
3L	12121239	CG34241	CG34241-in	intronic	58	0.351515	14	C	T	C	0.5172	37.7875	7.88872e-10	2R	7370849	inv	inv-in	intronic	67	0.411043	14	A	G	G
3R	22919226	CG14258	CG14258:2	synonymous	28	0.170732	20	C	T	C	-0.67447	37.7864	7.89301e-10	3L	3847741	Awh	Awh-in	intronic	72	0.436364	17	T	C	C
3R	21877137	exo84	exo84:3	nonsense	25	0.151515	14	A	G	A	0.76541	37.775	7.93911e-10	3R	6393220	hth	hth-in	intronic	25	0.152439	14	T	C	C
3L	10288273	mir-276b	-24612	intergenic	60	0.397351	7	C	A	A	-0.5208	37.765	7.98001e-10	2R	17426927	Egfr	Egfr-in	intronic	42	0.264151	11	C	T	C
3L	10288273	mir-276b	-24612	intergenic	60	0.397351	7	C	A	A	-0.5208	37.765	7.98001e-10	2R	17426927	Egfr	Egfr-in	intronic	42	0.264151	11	C	T	C
3L	10288273	Or67d	20549	intergenic	60	0.397351	7	C	A	A	-0.5208	37.765	7.98001e-10	2R	17426927	Egfr	Egfr-in	intronic	42	0.264151	11	C	T	C
3L	10288273	Or67d	20549	intergenic	60	0.397351	7	C	A	A	-0.5208	37.765	7.98001e-10	2R	17426927	Egfr	Egfr-in	intronic	42	0.264151	11	C	T	C
X	19507604	Tyler	Tyler-in	intronic	38	0.227545	14	C	G	C	-0.64333	37.7572	8.01197e-10	3L	9038614	Doc1	470	intergenic	28	0.170732	18	A	T	A
X	19507604	Shawn	Shawn-in	intronic	38	0.227545	14	C	G	C	-0.64333	37.7572	8.01197e-10	3L	9038614	Doc1	470	intergenic	28	0.170732	18	A	T	A
3R	13045803	CG31262	CG31262-in	intronic	46	0.283951	11	C	A	C	0.56436	37.7565	8.0147e-10	3L	9633254	fry	fry-in	intronic	54	0.350649	10	C	T	T
2R	6289315	CG12898	-5165	intergenic	29	0.180124	6	C	G	C	-0.63384	37.7532	8.02847e-10	2L	5266804	tkv	tkv-in	synonymous	55	0.350318	13	C	T	C
2R	6289315	Ir47a	21701	intergenic	29	0.180124	6	C	G	C	-0.63384	37.7532	8.02847e-10	2L	5266804	tkv	tkv-in	synonymous	55	0.350318	13	C	T	C
2R	6289315	CG42732	CG42732-in	intergenic	29	0.180124	6	C	G	C	-0.63384	37.7532	8.02847e-10	2L	5266804	tkv	tkv-in	synonymous	55	0.350318	13	C	T	C
2R	12378684	CG4439	CG4439-u5	UTR	36	0.220859	9	G	A	G	-0.57116	37.7512	8.03681e-10	3R	27803379	heph	heph-in	intronic	70	0.451613	13	A	G	G
3L	17931574	Eip75B	-13489	intergenic	55	0.341615	9	A	C	A	0.69	37.7497	8.04277e-10	3R	6449926	hth	hth-in	intronic	22	0.134146	18	C	A	A
3L	17931574	CG5290	25917	intergenic	55	0.341615	9	A	C	A	0.69	37.7497	8.04277e-10	3R	6449926	hth	hth-in	intronic	22	0.134146	18	C	A	A
2L	6530784	eya	eya-in	intronic	50	0.320513	8	A	G	A	0.54842	37.7487	8.04694e-10	3L	10999015	klu	klu-in	intronic	77	0.478261	12	G	A	G
3L	5167628	shep	shep-in	intronic	80	0.490798	12	G	A	G	-0.67733	37.7475	8.05209e-10	3L	2765760	Mrtf	Mrtf-in	intronic	20	0.11976	9	C	G	C
X	11630630	m	-17676	intergenic	22	0.131737	16	G	T	G	-0.68143	37.7467	8.05514e-10	2L	2177756	aop	aop-in	intronic	52	0.317073	18	T	A	T
X	11630630	inaF-C	4832	intergenic	22	0.131737	16	G	T	G	-0.68143	37.7467	8.05514e-10	2L	2177756	aop	aop-in	intronic	52	0.317073	18	T	A	T
X	11630630	CG15221	CG15221-u3	UTR	22	0.131737	16	G	T	G	-0.68143	37.7467	8.05514e-10	2L	2177756	aop	aop-in	intronic	52	0.317073	18	T	A	T
3L	10288301	mir-276b	-24584	intergenic	61	0.414966	6	G	A	A	-0.51126	37.7462	8.05737e-10	2R	17426927	Egfr	Egfr-in	intronic	42	0.264151	11	C	T	C
3L	10288301	mir-276b	-24584	intergenic	61	0.414966	6	G	A	A	-0.51126	37.7462	8.05737e-10	2R	17426927	Egfr	Egfr-in	intronic	42	0.264151	11	C	T	C
3L	10288301	Or67d	20577	intergenic	61	0.414966	6	G	A	A	-0.51126	37.7462	8.05737e-10	2R	17426927	Egfr	Egfr-in	intronic	42	0.264151	11	C	T	C
3L	10288301	Or67d	20577	intergenic	61	0.414966	6	G	A	A	-0.51126	37.7462	8.05737e-10	2R	17426927	Egfr	Egfr-in	intronic	42	0.264151	11	C	T	C
3L	6386632	CG42747	-7060	intergenic	62	0.378049	20	G	A	G	0.58512	37.7295	8.12666e-10	2R	18154274	dve	dve-in	intronic	37	0.22561	16	G	A	G
3L	6386632	Sfp65A	42703	intergenic	62	0.378049	20	G	A	G	0.58512	37.7295	8.12666e-10	2R	18154274	dve	dve-in	intronic	37	0.22561	16	G	A	G
2R	9510522	fas	-71	intergenic	61	0.393548	12	A	C	C	-0.49435	37.7279	8.13343e-10	3R	23005363	Ser	Ser-in	intronic	75	0.460123	21	T	C	C
2R	9510522	CG12464	13839	intergenic	61	0.393548	12	A	C	C	-0.49435	37.7279	8.13343e-10	3R	23005363	Ser	Ser-in	intronic	75	0.460123	21	T	C	C
2R	7153022	Cpr47Ee	Cpr47Ee-cds	nonsense	78	0.481481	15	G	T	G	0.52029	37.727	8.13682e-10	X	2857072	rst	rst-in	intronic	52	0.315152	13	A	C	A
3L	18647712	MYPT-75D	MYPT-75D-in	intronic	38	0.233129	11	T	A	T	0.7149	37.7266	8.13884e-10	3L	14350073	fz	fz-in	intronic	22	0.1375	14	A	G	G
3L	17985518	Eip75B	Eip75B-in	intronic	59	0.36875	12	G	T	G	0.51274	37.717	8.17905e-10	3L	8005084	nmo	nmo-in	intronic	57	0.407143	8	C	A	C
3L	11876775	CG5897	-3584	intergenic	38	0.227545	14	C	A	A	-0.59298	37.7112	8.20343e-10	X	8782714	Moe	Moe-in	intronic	37	0.221557	10	A	T	A
3L	11876775	CG14127	129	intergenic	38	0.227545	14	C	A	A	-0.59298	37.7112	8.20343e-10	X	8782714	Moe	Moe-in	intronic	37	0.221557	10	A	T	A
2R	13806981	PpY-55A	-35919	intergenic	26	0.164557	8	T	A	A	0.68411	37.7016	8.2435e-10	2R	13704241	grh	grh-in	intronic	56	0.352201	14	C	A	A
2R	13806981	CG14491	23898	intergenic	26	0.164557	8	T	A	A	0.68411	37.7016	8.2435e-10	2R	13704241	grh	grh-in	intronic	56	0.352201	14	C	A	A
2R	13806981	elk	elk-in	intronic	26	0.164557	8	T	A	A	0.68411	37.7016	8.2435e-10	2R	13704241	grh	grh-in	intronic	56	0.352201	14	C	A	A
2R	10775862	Cyp6a8	Cyp6a8-cds	nonsense	79	0.496855	20	G	A	A	-0.51882	37.6924	8.28275e-10	3R	25307288	Ptp99A	Ptp99A:18	synonymous	46	0.278788	10	T	C	C
3R	23593000	CG34353	-688	intergenic	38	0.233129	22	T	A	T	0.64605	37.6847	8.31529e-10	X	4333835	bi	bi-in	intronic	29	0.175758	12	C	T	T
3R	23593000	Ets98B	18911	intergenic	38	0.233129	22	T	A	T	0.64605	37.6847	8.31529e-10	X	4333835	bi	bi-in	intronic	29	0.175758	12	C	T	T
3R	21877161	exo84	exo84:3	missense	25	0.152439	16	A	G	A	0.77159	37.6838	8.31921e-10	3R	6393220	hth	hth-in	intronic	25	0.152439	14	T	C	C
X	8433732	l(1)G0095	-15544	intergenic	56	0.337349	7	G	T	G	-0.53083	37.6802	8.33457e-10	3L	12206084	app	app-u3	UTR	44	0.269939	10	A	T	A
X	8433732	PIP82	10001	intergenic	56	0.337349	7	G	T	G	-0.53083	37.6802	8.33457e-10	3L	12206084	app	app-u3	UTR	44	0.269939	10	A	T	A
X	8433732	Nrg	Nrg-in	intronic	56	0.337349	7	G	T	G	-0.53083	37.6802	8.33457e-10	3L	12206084	app	app-u3	UTR	44	0.269939	10	A	T	A
3R	26004848	CG15530	CG15530:3	missense	67	0.416149	18	G	A	G	0.65226	37.6469	8.47811e-10	2R	18051688	a	a-in	missense	20	0.121951	28	C	T	C
3R	26004848	CG15530	CG15530:3	missense	67	0.416149	18	G	A	G	0.65226	37.6469	8.47811e-10	2R	18051671	a	a-in	missense	21	0.127273	29	C	T	C
2L	9718973	Nckx30C	Nckx30C-in	intronic	68	0.43871	17	A	T	T	-0.47176	37.6381	8.5165e-10	3R	17027130	SNF4Agamma	SNF4Agamma-cds	synonymous	80	0.496894	15	T	C	T
X	5245462	SK	SK-in	intronic	74	0.459627	9	T	A	T	-0.46793	37.6371	8.52063e-10	X	3268128	dm	dm-in	intronic	83	0.494048	7	A	G	A
3L	13513417	bru-3	-17558	intergenic	47	0.290123	12	G	A	G	-0.57623	37.636	8.52572e-10	3R	25289138	Ptp99A	Ptp99A-in	intronic	48	0.317881	10	T	C	T
3L	13513417	CG10710	716	intergenic	47	0.290123	12	G	A	G	-0.57623	37.636	8.52572e-10	3R	25289138	Ptp99A	Ptp99A-in	intronic	48	0.317881	10	T	C	T
3L	19024288	nkd	nkd-in	intronic	39	0.24375	13	T	A	T	0.57927	37.6358	8.52652e-10	3R	25289439	Ptp99A	Ptp99A-in	intronic	67	0.41358	14	T	C	T
X	1607086	Scgdelta	-32823	intergenic	57	0.343373	11	C	A	C	-0.62978	37.6317	8.54436e-10	3L	8442903	Gug	-119	intergenic	30	0.181818	10	C	A	C
X	1607086	CG3795	2890	intergenic	57	0.343373	11	C	A	C	-0.62978	37.6317	8.54436e-10	3L	8442903	Gug	-119	intergenic	30	0.181818	10	C	A	C
3L	12379423	Ncc69	Ncc69-in	intronic	37	0.221557	19	T	G	G	0.528	37.6286	8.55785e-10	X	15500755	sog	sog:5	synonymous	72	0.439024	12	G	C	G
2R	5048890	CG8008	CG8008-u5	UTR	72	0.467532	16	A	G	G	0.52022	37.6256	8.5712e-10	2R	10100743	Sox15	829	intergenic	55	0.335366	13	G	T	G
X	6477557	CG34417	CG34417-u3	UTR	59	0.353293	13	A	T	A	0.69073	37.6173	8.60779e-10	3L	14349988	fz	fz-in	intronic	22	0.144737	10	A	C	C
3R	14020168	Ssdp	Ssdp-u3	intergenic	45	0.276074	19	C	T	C	-0.63404	37.6075	8.65111e-10	3L	8018366	nmo	nmo-in	intronic	61	0.369697	14	G	A	G
3L	19386392	CR32205	-29546	intergenic	23	0.137725	14	G	T	G	-0.6807	37.599	8.68889e-10	2R	10899003	hbs	hbs-u5	UTR	66	0.417722	13	G	A	A
3L	19386392	CG14087	3259	intergenic	23	0.137725	14	G	T	G	-0.6807	37.599	8.68889e-10	2R	10899003	hbs	hbs-u5	UTR	66	0.417722	13	G	A	A
3L	19386392	CG32206	CG32206-in	intronic	23	0.137725	14	G	T	G	-0.6807	37.599	8.68889e-10	2R	10899003	hbs	hbs-u5	UTR	66	0.417722	13	G	A	A
X	8433736	l(1)G0095	-15540	intergenic	56	0.339394	7	C	G	C	-0.53526	37.5968	8.69867e-10	3L	12206084	app	app-u3	UTR	44	0.269939	10	A	T	A
X	8433736	PIP82	10005	intergenic	56	0.339394	7	C	G	C	-0.53526	37.5968	8.69867e-10	3L	12206084	app	app-u3	UTR	44	0.269939	10	A	T	A
X	8433736	Nrg	Nrg-in	intronic	56	0.339394	7	C	G	C	-0.53526	37.5968	8.69867e-10	3L	12206084	app	app-u3	UTR	44	0.269939	10	A	T	A
3L	5167628	shep	shep-in	intronic	80	0.490798	12	G	A	G	-0.68472	37.5861	8.74651e-10	3L	2765891	Mrtf	Mrtf-in	intronic	21	0.125749	11	G	T	G
2R	7161936	TpnC47D	TpnC47D-in	intronic	46	0.294872	9	G	A	G	-0.5475	37.5807	8.77067e-10	3L	8838294	dally	dally-in	intronic	78	0.46988	15	A	G	A
3R	20237010	nAcRalpha-96Aa	nAcRalpha-96Aa-in	intronic	63	0.388889	16	G	T	T	-0.55688	37.574	8.80079e-10	3R	9906723	foxo	foxo-in	intronic	36	0.225	12	C	T	C
2R	4035210	Lpin	Lpin-in	synonymous	77	0.484277	13	T	C	C	0.50061	37.5728	8.8063e-10	2R	17431615	Egfr	Egfr-in	intronic	59	0.36875	12	T	A	T
2R	4035210	kermit	kermit-PC	synonymous	77	0.484277	13	T	C	C	0.50061	37.5728	8.8063e-10	2R	17431615	Egfr	Egfr-in	intronic	59	0.36875	12	T	A	T
2R	4035210	kermit	kermit-PC	synonymous	77	0.484277	13	T	C	C	0.50061	37.5728	8.8063e-10	2R	17431615	Egfr	Egfr-in	intronic	59	0.36875	12	T	A	T
2R	4035210	Lpin	Lpin-in	synonymous	77	0.484277	13	T	C	C	0.50061	37.5728	8.8063e-10	2R	17431615	Egfr	Egfr-in	intronic	59	0.36875	12	T	A	T
2R	2805417	CG30158	CG30158-in	intronic	62	0.385093	16	G	A	A	-0.68631	37.572	8.80993e-10	3R	15149999	Dl	Dl-in	intronic	38	0.233129	18	A	G	A
2L	5637661	CG31646	CG31646-in	intronic	55	0.348101	17	C	T	T	0.52289	37.5716	8.81167e-10	2L	4377131	Traf4	Traf4-in	intronic	45	0.288462	13	G	A	A
3R	11352039	CG31296	-4163	intergenic	79	0.49375	11	G	T	T	0.53087	37.5678	8.82884e-10	2R	6397616	lola	lola:14	missense	51	0.310976	20	C	T	C
3R	11352039	CG31296	-4163	intergenic	79	0.49375	11	G	T	T	0.53087	37.5678	8.82884e-10	2R	6397616	lola	lola:14	missense	51	0.310976	20	C	T	C
3R	11352039	CG14872	16677	intergenic	79	0.49375	11	G	T	T	0.53087	37.5678	8.82884e-10	2R	6397616	lola	lola:14	missense	51	0.310976	20	C	T	C
3R	11352039	CG14872	16677	intergenic	79	0.49375	11	G	T	T	0.53087	37.5678	8.82884e-10	2R	6397616	lola	lola:14	missense	51	0.310976	20	C	T	C
X	10025818	CG12645	-21827	intergenic	76	0.460606	7	G	A	G	-0.69654	37.5622	8.85425e-10	3L	16018808	Notum	Notum-in	intronic	24	0.144578	14	G	A	G
X	10025818	snoRNA:Me18S-A627	7340	intergenic	76	0.460606	7	G	A	G	-0.69654	37.5622	8.85425e-10	3L	16018808	Notum	Notum-in	intronic	24	0.144578	14	G	A	G
X	10025818	CG34104	CG34104-in	intronic	76	0.460606	7	G	A	G	-0.69654	37.5622	8.85425e-10	3L	16018808	Notum	Notum-in	intronic	24	0.144578	14	G	A	G
3R	13855922	htl	-15014	intergenic	57	0.35625	15	C	T	C	-0.50214	37.5604	8.86271e-10	3L	12586490	ara	ara-in	intronic	75	0.460123	12	T	G	T
3R	13855922	CG7794	4822	intergenic	57	0.35625	15	C	T	C	-0.50214	37.5604	8.86271e-10	3L	12586490	ara	ara-in	intronic	75	0.460123	12	T	G	T
2L	9328265	CG17005	CG17005:2	synonymous	37	0.228395	16	C	T	C	0.62217	37.5464	8.92638e-10	2R	12908354	Ark	Ark-in	intronic	39	0.23494	17	G	C	G
3R	23593000	CG34353	-688	intergenic	38	0.233129	22	T	A	T	0.65378	37.5356	8.97583e-10	X	4333798	bi	bi-in	intronic	28	0.170732	14	T	C	C
3R	23593000	Ets98B	18911	intergenic	38	0.233129	22	T	A	T	0.65378	37.5356	8.97583e-10	X	4333798	bi	bi-in	intronic	28	0.170732	14	T	C	C
2R	6336531	G-oalpha47A	G-oalpha47A-in	intronic	52	0.335484	9	C	T	C	-0.51773	37.5292	9.00555e-10	2R	9746362	tum	140	intergenic	45	0.308219	7	T	A	A
2L	10571161	w-cup	-4699	intergenic	41	0.275168	9	T	C	C	0.61936	37.5268	9.0166e-10	2R	14169092	sbb	sbb-in	intronic	36	0.216867	16	T	C	T
2L	10571161	CG6138	3149	intergenic	41	0.275168	9	T	C	C	0.61936	37.5268	9.0166e-10	2R	14169092	sbb	sbb-in	intronic	36	0.216867	16	T	C	T
2L	10571161	Trim9	Trim9-in	intronic	41	0.275168	9	T	C	C	0.61936	37.5268	9.0166e-10	2R	14169092	sbb	sbb-in	intronic	36	0.216867	16	T	C	T
2L	5388710	H15	-15632	intergenic	61	0.376543	12	G	A	A	0.57935	37.5266	9.01744e-10	X	8782714	Moe	Moe-in	intronic	37	0.221557	10	A	T	A
2L	5388710	CG42850	7656	intergenic	61	0.376543	12	G	A	A	0.57935	37.5266	9.01744e-10	X	8782714	Moe	Moe-in	intronic	37	0.221557	10	A	T	A
2R	7651359	CG13193	-4599	intergenic	46	0.277108	12	C	T	C	0.53605	37.526	9.02016e-10	2L	12607833	nub	nub-in	intronic	58	0.367089	7	A	T	T
2R	7651359	pyr	37509	intergenic	46	0.277108	12	C	T	C	0.53605	37.526	9.02016e-10	2L	12607833	nub	nub-in	intronic	58	0.367089	7	A	T	T
X	19507636	Tyler	Tyler-in	intronic	34	0.204819	16	A	G	A	-0.65856	37.5251	9.02418e-10	3L	9038614	Doc1	470	intergenic	28	0.170732	18	A	T	A
X	19507636	Shawn	Shawn-in	intronic	34	0.204819	16	A	G	A	-0.65856	37.5251	9.02418e-10	3L	9038614	Doc1	470	intergenic	28	0.170732	18	A	T	A
2L	2818683	Duox	Duox:3	missense	41	0.254658	12	T	C	C	-0.55428	37.5101	9.09408e-10	2R	9839722	AGO1	AGO1-in	intronic	50	0.310559	10	G	A	G
3R	16036786	cic	-41706	intergenic	65	0.448276	11	G	C	G	0.51792	37.5086	9.10111e-10	2R	6706846	dgo	dgo-u5	UTR	46	0.283951	15	G	A	G
3R	16036786	CG17199	1273	intergenic	65	0.448276	11	G	C	G	0.51792	37.5086	9.10111e-10	2R	6706846	dgo	dgo-u5	UTR	46	0.283951	15	G	A	G
3R	16036786	CG34139	CG34139-in	intronic	65	0.448276	11	G	C	G	0.51792	37.5086	9.10111e-10	2R	6706846	dgo	dgo-u5	UTR	46	0.283951	15	G	A	G
X	4581683	ctp	-151	intergenic	30	0.194805	5	T	A	T	0.65388	37.5076	9.10582e-10	2L	701024	ds	ds-in	intronic	49	0.304348	15	G	T	T
X	4581683	ctp	-151	intergenic	30	0.194805	5	T	A	T	0.65388	37.5076	9.10582e-10	2L	701024	ds	ds-in	intronic	49	0.304348	15	G	T	T
X	4581683	Pp2C1	779	intergenic	30	0.194805	5	T	A	T	0.65388	37.5076	9.10582e-10	2L	701024	ds	ds-in	intronic	49	0.304348	15	G	T	T
X	4581683	Pp2C1	779	intergenic	30	0.194805	5	T	A	T	0.65388	37.5076	9.10582e-10	2L	701024	ds	ds-in	intronic	49	0.304348	15	G	T	T
2R	11980447	Dg	Dg-in	intronic	28	0.170732	16	G	T	G	0.6564	37.5035	9.12497e-10	2R	10464566	ttv	ttv-in	intronic	66	0.4	10	G	T	G
X	6611198	CG3168	-3310	intergenic	55	0.331325	11	C	A	C	-0.52814	37.4978	9.15157e-10	2L	4365861	Traf4	Traf4-in	intronic	45	0.276074	17	T	A	T
X	6611198	CG14441	186	intergenic	55	0.331325	11	C	A	C	-0.52814	37.4978	9.15157e-10	2L	4365861	Traf4	Traf4-in	intronic	45	0.276074	17	T	A	T
3R	21877167	exo84	exo84:3	missense	25	0.151515	17	A	G	A	0.76994	37.4973	9.15422e-10	3R	6393220	hth	hth-in	intronic	25	0.152439	14	T	C	C
2L	1357842	CG31659	-1083	intergenic	30	0.186335	17	G	T	G	-0.60528	37.4918	9.17978e-10	2R	17413410	Egfr	Egfr-in	intronic	59	0.36875	15	A	C	C
2L	1357842	CG31659	-1083	intergenic	30	0.186335	17	G	T	G	-0.60528	37.4918	9.17978e-10	2R	17413410	Egfr	Egfr-in	intronic	59	0.36875	15	A	C	C
2L	1357842	CG5565	1918	intergenic	30	0.186335	17	G	T	G	-0.60528	37.4918	9.17978e-10	2R	17413410	Egfr	Egfr-in	intronic	59	0.36875	15	A	C	C
2L	1357842	CG5565	1918	intergenic	30	0.186335	17	G	T	G	-0.60528	37.4918	9.17978e-10	2R	17413410	Egfr	Egfr-in	intronic	59	0.36875	15	A	C	C
X	1620377	Scgdelta	-19532	intergenic	23	0.137725	16	T	C	T	0.84625	37.4901	9.18769e-10	2R	18047891	a	a-in	intronic	20	0.121951	12	C	G	C
X	1620377	CG3795	16181	intergenic	23	0.137725	16	T	C	T	0.84625	37.4901	9.18769e-10	2R	18047891	a	a-in	intronic	20	0.121951	12	C	G	C
3L	17629002	CG7497	CG7497-in	intronic	58	0.367089	6	A	T	A	0.49235	37.4879	9.19795e-10	3R	21715142	Lnk	Lnk-in	intronic	75	0.474684	12	T	A	A
2L	8810575	SoxN	-15050	intergenic	25	0.151515	19	G	A	G	-0.71055	37.486	9.20728e-10	3L	341707	Ptpmeg	Ptpmeg-in	intronic	70	0.424242	14	G	C	G
2L	8810575	CG42712	543	intergenic	25	0.151515	19	G	A	G	-0.71055	37.486	9.20728e-10	3L	341707	Ptpmeg	Ptpmeg-in	intronic	70	0.424242	14	G	C	G
X	4417201	CG3556	-7063	intergenic	76	0.463415	10	A	G	G	-0.4667	37.4817	9.22729e-10	X	4329475	bi	bi-in	intronic	63	0.379518	14	G	A	A
X	4417201	bi	38716	intergenic	76	0.463415	10	A	G	G	-0.4667	37.4817	9.22729e-10	X	4329475	bi	bi-in	intronic	63	0.379518	14	G	A	A
X	19020093	tgy	tgy-u3	synonymous	28	0.169697	13	A	G	G	-0.61876	37.477	9.24991e-10	2L	5266792	tkv	tkv-in	synonymous	55	0.348101	11	G	T	G
3L	5283412	tRNA:S7:64D	-51772	intergenic	67	0.403614	16	G	A	A	0.57662	37.474	9.26416e-10	3R	6461741	hth	hth-in	intronic	38	0.240506	16	G	A	G
3L	5283412	CG4669	53681	intergenic	67	0.403614	16	G	A	A	0.57662	37.474	9.26416e-10	3R	6461741	hth	hth-in	intronic	38	0.240506	16	G	A	G
2R	2336403	jing	-53361	intergenic	38	0.240506	10	A	G	A	-0.52933	37.4701	9.28258e-10	2L	2177108	aop	aop-in	intronic	63	0.39375	14	A	T	A
2R	2336403	Pld	193632	intergenic	38	0.240506	10	A	G	A	-0.52933	37.4701	9.28258e-10	2L	2177108	aop	aop-in	intronic	63	0.39375	14	A	T	A
3L	18338790	rpr	-51863	intergenic	59	0.380645	5	C	A	C	0.50049	37.4574	9.34309e-10	2L	7920746	Snoo	Snoo-in	intronic	67	0.432258	15	A	G	A
3L	18338790	grim	41276	intergenic	59	0.380645	5	C	A	C	0.50049	37.4574	9.34309e-10	2L	7920746	Snoo	Snoo-in	intronic	67	0.432258	15	A	G	A
X	19229004	gfA	gfA-in	intronic	21	0.138158	5	T	A	A	0.70289	37.4569	9.34552e-10	2R	19831602	G-salpha60A	G-salpha60A-in	intronic	63	0.384146	18	G	A	G
3L	11866376	CG14128	-5839	intergenic	74	0.480519	10	C	A	C	0.46783	37.4466	9.39504e-10	2R	19831602	G-salpha60A	G-salpha60A-in	intronic	63	0.384146	18	G	A	G
3L	11866376	CG5906	1971	intergenic	74	0.480519	10	C	A	C	0.46783	37.4466	9.39504e-10	2R	19831602	G-salpha60A	G-salpha60A-in	intronic	63	0.384146	18	G	A	G
X	4085077	Fas2	Fas2-in	intronic	81	0.48503	9	G	A	G	-0.58094	37.4375	9.43893e-10	3R	25273181	Ptp99A	Ptp99A-in	intronic	28	0.171779	16	G	A	G
3L	18338897	rpr	-51756	intergenic	68	0.427673	7	A	C	C	0.50747	37.4333	9.4591e-10	2L	7920746	Snoo	Snoo-in	intronic	67	0.432258	15	A	G	A
3L	18338897	grim	41383	intergenic	68	0.427673	7	A	C	C	0.50747	37.4333	9.4591e-10	2L	7920746	Snoo	Snoo-in	intronic	67	0.432258	15	A	G	A
X	1611956	Scgdelta	-27953	intergenic	63	0.377246	14	T	C	T	-0.63725	37.4328	9.46176e-10	3L	8442949	Gug	-73	intergenic	31	0.186747	10	T	C	T
X	1611956	CG3795	7760	intergenic	63	0.377246	14	T	C	T	-0.63725	37.4328	9.46176e-10	3L	8442949	Gug	-73	intergenic	31	0.186747	10	T	C	T
3L	9132323	nwk	nwk:3	missense	25	0.149701	15	G	T	G	-0.69012	37.4289	9.48064e-10	X	4375773	bi	bi-in	intronic	42	0.281879	13	G	A	G
2R	5520470	tRNA:M3:46A	-28260	intergenic	39	0.251613	18	A	C	A	-0.5575	37.4264	9.49275e-10	2R	10090126	Sox15	Sox15-PA	missense	57	0.347561	17	C	T	T
2R	5520470	mir-307	11627	intergenic	39	0.251613	18	A	C	A	-0.5575	37.4264	9.49275e-10	2R	10090126	Sox15	Sox15-PA	missense	57	0.347561	17	C	T	T
2R	5520470	Mmp2	Mmp2-in	intronic	39	0.251613	18	A	C	A	-0.5575	37.4264	9.49275e-10	2R	10090126	Sox15	Sox15-PA	missense	57	0.347561	17	C	T	T
2L	15373795	wor	-49498	intergenic	53	0.339744	13	A	G	A	-0.52025	37.4242	9.5037e-10	3R	16990993	SNF4Agamma	SNF4Agamma-in	intronic	49	0.316129	10	G	A	G
2L	15373795	CG15258	12168	intergenic	53	0.339744	13	A	G	A	-0.52025	37.4242	9.5037e-10	3R	16990993	SNF4Agamma	SNF4Agamma-in	intronic	49	0.316129	10	G	A	G
X	9949049	Yp1	Yp1-cds	synonymous	46	0.298701	5	C	T	C	0.52796	37.4186	9.53065e-10	3L	19695294	serp	serp-PB	synonymous	73	0.450617	10	G	T	T
3R	21833482	malpha	-3133	intergenic	53	0.333333	8	T	A	T	-0.49883	37.4169	9.53895e-10	X	15511759	sog	sog-in	intronic	65	0.389222	14	T	C	C
3R	21833482	HLHmbeta	1737	intergenic	53	0.333333	8	T	A	T	-0.49883	37.4169	9.53895e-10	X	15511759	sog	sog-in	intronic	65	0.389222	14	T	C	C
3L	18647712	MYPT-75D	MYPT-75D-in	intronic	38	0.233129	11	T	A	T	0.713	37.4119	9.5635e-10	3L	14350101	fz	fz-in	intronic	22	0.135802	16	T	C	C
3L	8779831	CG5804	-1413	intergenic	25	0.149701	26	T	A	T	-0.77484	37.4041	9.6022e-10	3R	15149999	Dl	Dl-in	intronic	38	0.233129	18	A	G	A
3L	8779831	CG6576	29564	intergenic	25	0.149701	26	T	A	T	-0.77484	37.4041	9.6022e-10	3R	15149999	Dl	Dl-in	intronic	38	0.233129	18	A	G	A
3L	8779831	Fhos	Fhos:13	synonymous	25	0.149701	26	T	A	T	-0.77484	37.4041	9.6022e-10	3R	15149999	Dl	Dl-in	intronic	38	0.233129	18	A	G	A
3L	12047404	Sema-5c	-13207	intergenic	52	0.325	9	A	G	A	0.51375	37.4029	9.60791e-10	X	13097682	sno	sno-u3	UTR	53	0.317365	9	C	A	A
3L	12047404	CG6793	10139	intergenic	52	0.325	9	A	G	A	0.51375	37.4029	9.60791e-10	X	13097682	sno	sno-u3	UTR	53	0.317365	9	C	A	A
3L	12047404	rols	rols-in	intronic	52	0.325	9	A	G	A	0.51375	37.4029	9.60791e-10	X	13097682	sno	sno-u3	UTR	53	0.317365	9	C	A	A
3R	14784054	CG42613	CG42613-in	intergenic	38	0.230303	16	C	T	C	-0.5971	37.3999	9.62249e-10	2R	9363166	arr	arr-in	intronic	14	0.112903	5	G	A	G
X	3397519	Gas8	Gas8-in	intronic	39	0.233533	10	A	G	A	0.54692	37.3847	9.69778e-10	3R	2787223	Antp	Antp-in	intronic	57	0.37013	15	C	T	C
X	8047045	CG18262	CG18262-u5	intergenic	68	0.43038	6	A	T	T	0.52752	37.3793	9.72491e-10	3L	331436	Ptpmeg	Ptpmeg-in	synonymous	47	0.281437	20	A	C	A
X	10084977	CG15311	CG15311-in	intronic	47	0.284848	12	T	C	T	-0.57443	37.3778	9.73242e-10	3L	2728943	Mrtf	Mrtf-u5	synonymous	41	0.259494	10	A	G	A
3L	11667317	TfIIEalpha	-7809	intergenic	45	0.292208	7	G	A	A	0.57401	37.3685	9.77862e-10	2R	20239564	bs	bs-in	intronic	44	0.271605	9	G	A	G
3L	11667317	mir-274	17200	intergenic	45	0.292208	7	G	A	A	0.57401	37.3685	9.77862e-10	2R	20239564	bs	bs-in	intronic	44	0.271605	9	G	A	G
3L	11667317	CG32085	CG32085-in	intronic	45	0.292208	7	G	A	A	0.57401	37.3685	9.77862e-10	2R	20239564	bs	bs-in	intronic	44	0.271605	9	G	A	G
2L	6024577	CG9109	-1293	intergenic	64	0.397516	15	C	G	G	0.50418	37.3682	9.78019e-10	2R	18169602	dve	dve-in	intronic	75	0.477707	9	C	T	C
2L	6024577	CG9107	32	intergenic	64	0.397516	15	C	G	G	0.50418	37.3682	9.78019e-10	2R	18169602	dve	dve-in	intronic	75	0.477707	9	C	T	C
3L	18572825	CG7271	-9038	intergenic	29	0.176829	15	G	A	A	-0.62324	37.3664	9.78937e-10	X	2371805	trol	trol:8	missense	60	0.359281	10	G	A	A
3L	18572825	star1	3399	intergenic	29	0.176829	15	G	A	A	-0.62324	37.3664	9.78937e-10	X	2371805	trol	trol:8	missense	60	0.359281	10	G	A	A
X	16792503	CG4928	-14728	intergenic	71	0.42515	13	G	C	G	0.54961	37.3654	9.79458e-10	2L	3937381	fred	fred-in	intronic	41	0.253086	9	C	A	C
X	16792503	CG33252	1296	intergenic	71	0.42515	13	G	C	G	0.54961	37.3654	9.79458e-10	2L	3937381	fred	fred-in	intronic	41	0.253086	9	C	A	C
X	3413092	CG32792	-38753	intergenic	34	0.208589	11	T	C	T	0.63635	37.3602	9.82062e-10	2R	7411535	en	en-u3	UTR	39	0.236364	12	C	G	C
X	3413092	CG13021	2999	intergenic	34	0.208589	11	T	C	T	0.63635	37.3602	9.82062e-10	2R	7411535	en	en-u3	UTR	39	0.236364	12	C	G	C
X	3413092	CG32791	CG32791-in	intronic	34	0.208589	11	T	C	T	0.63635	37.3602	9.82062e-10	2R	7411535	en	en-u3	UTR	39	0.236364	12	C	G	C
2L	913942	GluRIIC	-148	intergenic	53	0.333333	15	T	A	T	0.75564	37.3578	9.8328e-10	2R	9829797	shot	182	intergenic	23	0.140244	13	C	T	C
2L	913942	snRNA:U1:21D	12280	intergenic	53	0.333333	15	T	A	T	0.75564	37.3578	9.8328e-10	2R	9829797	shot	182	intergenic	23	0.140244	13	C	T	C
X	1611956	Scgdelta	-27953	intergenic	63	0.377246	14	T	C	T	-0.6324	37.3436	9.90436e-10	3L	8442890	Gug	-132	intergenic	29	0.176829	8	C	A	C
X	1611956	CG3795	7760	intergenic	63	0.377246	14	T	C	T	-0.6324	37.3436	9.90436e-10	3L	8442890	Gug	-132	intergenic	29	0.176829	8	C	A	C
3L	15738816	CG6244	-62702	intergenic	49	0.30625	9	C	T	C	0.57001	37.3431	9.90728e-10	X	15791749	shi	shi-in	intronic	60	0.359281	10	A	G	A
3L	15738816	comm	17162	intergenic	49	0.30625	9	C	T	C	0.57001	37.3431	9.90728e-10	X	15791749	shi	shi-in	intronic	60	0.359281	10	A	G	A
2R	2336478	jing	-53286	intergenic	39	0.242236	12	T	C	T	-0.55241	37.337	9.93834e-10	2L	2177108	aop	aop-in	intronic	63	0.39375	14	A	T	A
2R	2336478	Pld	193707	intergenic	39	0.242236	12	T	C	T	-0.55241	37.337	9.93834e-10	2L	2177108	aop	aop-in	intronic	63	0.39375	14	A	T	A
3L	13166372	snky	-410	intergenic	62	0.3875	10	T	G	T	-0.44386	37.3353	9.94705e-10	3L	1794227	dlt	dlt-in	intronic	70	0.424242	13	A	C	A
3L	13166372	CG33262	36206	intergenic	62	0.3875	10	T	G	T	-0.44386	37.3353	9.94705e-10	3L	1794227	dlt	dlt-in	intronic	70	0.424242	13	A	C	A
3R	27235832	Gprk2	Gprk2-in	intronic	48	0.3	11	T	G	T	0.55467	37.3342	9.95236e-10	3L	2734339	Mrtf	Mrtf-in	intronic	53	0.33758	8	G	T	G
X	22092780	CG12446	-118343	intergenic	71	0.430303	11	C	T	C	-0.51055	37.3311	9.96826e-10	2R	18056368	a	a-in	intronic	62	0.3875	18	C	A	C
X	22092780	Cda4	58235	intergenic	71	0.430303	11	C	T	C	-0.51055	37.3311	9.96826e-10	2R	18056368	a	a-in	intronic	62	0.3875	18	C	A	C
2R	19933439	tsr	tsr-in	intronic	76	0.463415	19	T	A	A	0.60364	37.3276	9.98637e-10	3R	6393166	hth	hth-in	intronic	32	0.197531	14	C	T	T

## Sheet: CSMIC
Chromosome X	Position X	Gene Symbol X	SNP Location X	Site Class X	Lines with minor allele X	MAF X	Mean Coverage X	Major Allele X	Minor Allele X	Reference SNP X	Beta	Chisquare	Pvalue	Chromosome Y	Position Y	Gene Symbol Y	SNP Location Y	Site Class Y	Lines with minor allele Y	MAF Y	Mean Coverage Y	Major Allele Y	Minor Allele Y	Reference SNP Y
2L	4300897	tutl	tutl-in	intronic	48	0.296296	13	C	A	A	0.63533	60.9721	5.78899e-15	3R	20060205	mask	mask-in	intronic	72	0.444444	18	T	C	T
3R	24976742	ligatin	ligatin-PA	synonymous	64	0.395062	12	A	T	A	0.56421	55.3223	1.02302e-13	3R	16991068	SNF4Agamma	SNF4Agamma-in	intronic	54	0.346154	13	T	A	T
3R	11025805	CG42542	CG42542-in	intronic	73	0.462025	13	C	T	C	-0.64385	53.0876	3.18991e-13	2R	2008321	EcR	EcR-in	intronic	35	0.213415	20	G	T	G
3R	14784047	CG42613	CG42613-in	intergenic	40	0.243902	17	A	C	A	-0.66796	52.0437	5.42791e-13	2R	9363166	arr	arr-in	intronic	14	0.112903	5	G	A	G
3R	14784043	CG42613	CG42613-in	intergenic	41	0.251534	16	T	C	T	-0.65911	51.3162	7.86255e-13	2R	9363166	arr	arr-in	intronic	14	0.112903	5	G	A	G
3R	5073959	CG8420	CG8420-cds	missense	64	0.407643	15	G	A	G	-0.64695	49.6681	1.82079e-12	2R	2008321	EcR	EcR-in	intronic	35	0.213415	20	G	T	G
2L	3628903	for	for-in	intronic	78	0.490566	22	G	A	G	-0.79813	49.1698	2.34736e-12	X	2436373	trol	trol-in	intronic	20	0.11976	12	G	C	G
3R	26101942	hdc	-1714	intergenic	67	0.41875	15	T	G	T	0.68931	49.0655	2.47556e-12	2R	18262141	Rtf1	-456	intergenic	36	0.218182	12	A	T	A
3R	26101942	CG18404	22123	intergenic	67	0.41875	15	T	G	T	0.68931	49.0655	2.47556e-12	2R	18262141	Rtf1	-456	intergenic	36	0.218182	12	A	T	A
X	19480224	CG14204	CG14204-in	intronic	57	0.345455	17	G	A	G	0.57303	48.9818	2.58352e-12	3R	25288642	Ptp99A	Ptp99A-in	intronic	48	0.294479	18	A	C	C
X	21394294	CG14476	-77333	intergenic	53	0.33125	10	T	C	C	-0.57346	48.9631	2.60824e-12	3R	6403430	hth	hth-in	intronic	73	0.464968	18	G	A	G
X	21394294	CG32822	1237	intergenic	53	0.33125	10	T	C	C	-0.57346	48.9631	2.60824e-12	3R	6403430	hth	hth-in	intronic	73	0.464968	18	G	A	G
3R	11025443	CG42542	CG42542-in	intronic	73	0.462025	18	T	C	T	-0.62538	48.6307	3.08991e-12	2R	2008321	EcR	EcR-in	intronic	35	0.213415	20	G	T	G
3L	5351608	Klp64D	Klp64D-PA	missense	53	0.317365	19	C	T	C	0.57134	47.5344	5.40464e-12	X	13308419	Set2	Set2-cds	missense	60	0.361446	14	G	C	G
2L	19594998	Lar	-11571	intergenic	43	0.273885	13	T	A	A	0.5774	47.4957	5.51236e-12	X	2586532	per	per-u3	UTR	73	0.437126	17	T	A	T
2L	19594998	CG10366	8558	intergenic	43	0.273885	13	T	A	A	0.5774	47.4957	5.51236e-12	X	2586532	per	per-u3	UTR	73	0.437126	17	T	A	T
2L	9228831	tai	tai-in	intronic	64	0.407643	14	T	A	A	-0.63022	47.4689	5.58821e-12	2R	1595616	ap	ap-in	intronic	45	0.283019	15	A	G	A
3L	1285655	CG32333	CG32333-in	intronic	65	0.401235	15	C	G	G	-0.5192	47.1515	6.57059e-12	3L	8831345	dally	dally-in	synonymous	77	0.461078	17	G	A	A
3R	6381124	hth	hth-in	intronic	50	0.314465	9	G	A	A	-0.58548	47.1037	6.73279e-12	2R	15554220	hrg	hrg:6	missense	62	0.380368	20	G	T	T
2R	15554220	hrg	hrg:6	missense	62	0.380368	20	G	T	T	-0.58548	47.1037	6.73279e-12	3R	6381124	hth	hth-in	intronic	50	0.314465	9	G	A	A
X	10122041	CG34408	CG34408-in	intronic	52	0.322981	12	G	T	T	-0.65531	46.8013	7.85622e-12	2R	9904488	mam	mam-in	intronic	53	0.329193	12	T	A	A
X	10122029	CG34408	CG34408-in	intronic	52	0.317073	13	C	T	T	-0.65951	46.548	8.94018e-12	2R	9904488	mam	mam-in	intronic	53	0.329193	12	T	A	A
3R	16243171	CG4323	-82593	intergenic	46	0.289308	11	C	G	C	0.58067	46.4669	9.31811e-12	3L	8026293	nmo	nmo-in	intronic	67	0.406061	13	G	A	G
3R	16243171	CG10881	8212	intergenic	46	0.289308	11	C	G	C	0.58067	46.4669	9.31811e-12	3L	8026293	nmo	nmo-in	intronic	67	0.406061	13	G	A	G
3R	16243171	CG42801	CG42801-in	intronic	46	0.289308	11	C	G	C	0.58067	46.4669	9.31811e-12	3L	8026293	nmo	nmo-in	intronic	67	0.406061	13	G	A	G
2L	1144314	CG4726	CG4726-in	intronic	49	0.308176	9	C	T	C	0.76774	46.3059	1.01159e-11	3R	12892603	Dad	Dad-in	intronic	25	0.149701	10	C	G	C
2L	12134240	Gr33a	-3825	intergenic	65	0.442177	9	T	A	A	0.55001	46.0908	1.12897e-11	3R	6392303	hth	hth-in	intronic	60	0.382166	16	G	A	A
2L	12134240	rho-6	873	intergenic	65	0.442177	9	T	A	A	0.55001	46.0908	1.12897e-11	3R	6392303	hth	hth-in	intronic	60	0.382166	16	G	A	A
X	7759031	Ir7b	Ir7b-cds	missense	42	0.251497	11	T	C	T	0.62202	45.99	1.18861e-11	2R	12467887	Cdk4	Cdk4-u5	UTR	52	0.33121	17	G	A	A
X	7759031	Ir7b	Ir7b-cds	missense	42	0.251497	11	T	C	T	0.62202	45.99	1.18861e-11	2R	12467887	Cdk4	Cdk4-u5	UTR	52	0.33121	17	G	A	A
2R	18675165	blw	-11396	intergenic	23	0.207207	7	C	T	T	-0.62718	45.6561	1.40944e-11	2R	2008321	EcR	EcR-in	intronic	35	0.213415	20	G	T	G
2R	18675165	CG30270	2724	intergenic	23	0.207207	7	C	T	T	-0.62718	45.6561	1.40944e-11	2R	2008321	EcR	EcR-in	intronic	35	0.213415	20	G	T	G
2R	18675165	CG42260	CG42260-in	intronic	23	0.207207	7	C	T	T	-0.62718	45.6561	1.40944e-11	2R	2008321	EcR	EcR-in	intronic	35	0.213415	20	G	T	G
3R	21312834	Dhap-at	Dhap-at:2	synonymous	57	0.360759	18	C	T	C	-0.56676	45.5782	1.46662e-11	2L	2939451	lilli	lilli-in	intronic	56	0.35	21	G	A	G
2R	6887274	luna	luna-in	intronic	68	0.419753	19	T	A	T	0.53097	45.5643	1.4771e-11	3L	8557682	rhea	rhea:13	synonymous	71	0.432927	17	A	C	C
2R	20210826	slbo	-8219	intergenic	34	0.209877	12	G	A	G	0.64299	45.525	1.50703e-11	3R	17026079	SNF4Agamma	SNF4Agamma-in	intronic	73	0.453416	18	T	A	A
2R	20210826	betaTub60D	10200	intergenic	34	0.209877	12	G	A	G	0.64299	45.525	1.50703e-11	3R	17026079	SNF4Agamma	SNF4Agamma-in	intronic	73	0.453416	18	T	A	A
2L	14605910	osp	osp-in	intronic	47	0.303226	13	C	T	C	-0.72322	45.3215	1.67204e-11	3L	7996714	nmo	nmo-in	RNA	37	0.22561	16	C	T	C
2L	1144314	CG4726	CG4726-in	intronic	49	0.308176	9	C	T	C	0.73624	45.1755	1.80142e-11	3R	12893934	Dad	Dad-in	intronic	26	0.157576	14	T	A	T
3L	7816725	Pdp1	Pdp1-in	intronic	10	0.0641026	11	T	G	T	0.7537	45.1617	1.81416e-11	2L	379692	al	al-in	intronic	73	0.453416	16	A	G	A
2L	12134238	Gr33a	-3827	intergenic	67	0.452703	8	C	T	T	0.54918	45.0968	1.87535e-11	3R	6392303	hth	hth-in	intronic	60	0.382166	16	G	A	A
2L	12134238	rho-6	871	intergenic	67	0.452703	8	C	T	T	0.54918	45.0968	1.87535e-11	3R	6392303	hth	hth-in	intronic	60	0.382166	16	G	A	A
3R	14784054	CG42613	CG42613-in	intergenic	38	0.230303	16	C	T	C	-0.64245	44.9513	2.01992e-11	2R	9363166	arr	arr-in	intronic	14	0.112903	5	G	A	G
3R	10169022	NK7.1	NK7.1-in	intronic	17	0.10559	15	T	A	T	-0.72424	44.8397	2.13846e-11	2L	7907819	Snoo	Snoo-in	intronic	71	0.458065	19	A	T	A
3R	15759139	mira	mira-cds	synonymous	55	0.352564	10	C	T	T	-0.58167	44.7677	2.21854e-11	2R	20239016	bs	bs-in	intronic	39	0.242236	15	A	C	A
3R	15759139	Hs6st	Hs6st-in	synonymous	55	0.352564	10	C	T	T	-0.58167	44.7677	2.21854e-11	2R	20239016	bs	bs-in	intronic	39	0.242236	15	A	C	A
X	10122042	CG34408	CG34408-in	intronic	52	0.315152	13	T	G	G	-0.64494	44.6986	2.29821e-11	2R	9904488	mam	mam-in	intronic	53	0.329193	12	T	A	A
X	10122022	CG34408	CG34408-in	intronic	52	0.313253	11	G	C	C	-0.64245	44.6975	2.29947e-11	2R	9904488	mam	mam-in	intronic	53	0.329193	12	T	A	A
X	13510582	Tango2	-443	intergenic	56	0.337349	11	C	A	A	0.62546	44.6725	2.32904e-11	3L	4157909	nab	nab-in	intronic	45	0.27439	10	C	T	T
X	13510582	tth	195	intergenic	56	0.337349	11	C	A	A	0.62546	44.6725	2.32904e-11	3L	4157909	nab	nab-in	intronic	45	0.27439	10	C	T	T
3L	5351611	Klp64D	Klp64D-PA	synonymous	53	0.317365	20	T	C	T	0.57018	44.6604	2.34354e-11	X	13308419	Set2	Set2-cds	missense	60	0.361446	14	G	C	G
2L	12134237	Gr33a	-3828	intergenic	67	0.458904	9	G	C	C	0.54959	44.6439	2.36332e-11	3R	6392303	hth	hth-in	intronic	60	0.382166	16	G	A	A
2L	12134237	rho-6	870	intergenic	67	0.458904	9	G	C	C	0.54959	44.6439	2.36332e-11	3R	6392303	hth	hth-in	intronic	60	0.382166	16	G	A	A
X	10122021	CG34408	CG34408-in	intronic	52	0.313253	13	G	T	T	-0.64525	44.5591	2.46796e-11	2R	9904488	mam	mam-in	intronic	53	0.329193	12	T	A	A
X	10122037	CG34408	CG34408-in	intronic	52	0.313253	14	T	A	A	-0.64724	44.5366	2.4965e-11	2R	9904488	mam	mam-in	intronic	53	0.329193	12	T	A	A
2L	11915238	Or33a	-19267	intergenic	32	0.214765	6	C	T	T	0.64234	44.3753	2.71086e-11	2L	7963861	Snoo	Snoo-in	intronic	74	0.459627	7	T	C	T
2L	11915238	CG42751	61313	intergenic	32	0.214765	6	C	T	T	0.64234	44.3753	2.71086e-11	2L	7963861	Snoo	Snoo-in	intronic	74	0.459627	7	T	C	T
2L	11915238	Pde1c	Pde1c-in	intronic	32	0.214765	6	C	T	T	0.64234	44.3753	2.71086e-11	2L	7963861	Snoo	Snoo-in	intronic	74	0.459627	7	T	C	T
2L	1144314	CG4726	CG4726-in	intronic	49	0.308176	9	C	T	C	0.72743	44.3075	2.80631e-11	3R	12893923	Dad	Dad-in	intronic	28	0.17284	13	A	T	A
2R	6887275	luna	luna-in	intronic	68	0.42236	19	G	T	G	0.53234	44.3046	2.81057e-11	3L	8557682	rhea	rhea:13	synonymous	71	0.432927	17	A	C	C
2R	13806982	PpY-55A	-35918	intergenic	27	0.16875	8	A	G	G	0.72427	44.2621	2.87229e-11	2R	13704241	grh	grh-in	intronic	56	0.352201	14	C	A	A
2R	13806982	CG14491	23899	intergenic	27	0.16875	8	A	G	G	0.72427	44.2621	2.87229e-11	2R	13704241	grh	grh-in	intronic	56	0.352201	14	C	A	A
2R	13806982	elk	elk-in	intronic	27	0.16875	8	A	G	G	0.72427	44.2621	2.87229e-11	2R	13704241	grh	grh-in	intronic	56	0.352201	14	C	A	A
3L	5355635	CG4769	CG4769-u3	UTR	31	0.184524	16	C	A	C	-0.76745	44.2105	2.94892e-11	X	3038007	N	N-in	intronic	36	0.226415	10	T	C	T
2R	7513347	CG9005	CG9005-in	intronic	49	0.302469	23	A	T	T	-0.55653	44.1855	2.98683e-11	2R	14122211	fj	fj-PA	synonymous	80	0.496894	12	G	A	A
3R	11031852	Spn5	Spn5-in	intronic	46	0.285714	13	C	G	C	0.61039	44.1237	3.08265e-11	2L	2919970	lilli	lilli-in	intronic	76	0.484076	13	C	T	C
3R	24645925	CG1647	-22	intergenic	53	0.333333	15	A	T	A	-0.91335	44.1235	3.08291e-11	2R	18044617	a	a-in	intronic	17	0.10241	13	C	A	C
3R	24645925	CG1523	514	intergenic	53	0.333333	15	A	T	A	-0.91335	44.1235	3.08291e-11	2R	18044617	a	a-in	intronic	17	0.10241	13	C	A	C
2L	1144314	CG4726	CG4726-in	intronic	49	0.308176	9	C	T	C	0.73338	44.1189	3.09022e-11	3R	12890858	Dad	Dad-in	intronic	24	0.146341	17	C	T	C
2R	18729049	CG9826	CG9826:2	synonymous	80	0.493827	17	A	G	G	-0.51357	44.0667	3.17366e-11	3L	9640868	fry	fry-in	intronic	66	0.4	19	G	A	A
2L	1144314	CG4726	CG4726-in	intronic	49	0.308176	9	C	T	C	0.73319	44.0504	3.20033e-11	3R	12893606	Dad	Dad-in	intronic	26	0.155689	13	G	T	G
X	2544082	sgg	sgg-in	intronic	37	0.220238	17	G	C	C	0.69466	43.9421	3.38239e-11	2R	9842598	AGO1	AGO1-in	intronic	30	0.182927	17	C	T	C
X	10122045	CG34408	CG34408-in	intronic	52	0.315152	14	T	A	A	-0.63801	43.916	3.42777e-11	2R	9904488	mam	mam-in	intronic	53	0.329193	12	T	A	A
3R	11025354	CG42542	CG42542:6	synonymous	74	0.4625	14	C	T	C	-0.58836	43.8827	3.48654e-11	2R	2008321	EcR	EcR-in	intronic	35	0.213415	20	G	T	G
2L	3273904	CG3332	-1890	intergenic	31	0.186747	16	G	A	G	-0.86792	43.861	3.52546e-11	3L	18160282	W	-560	intergenic	30	0.184049	14	T	G	T
2L	3273904	CG3347	2098	intergenic	31	0.186747	16	G	A	G	-0.86792	43.861	3.52546e-11	3L	18160282	W	-560	intergenic	30	0.184049	14	T	G	T
2R	20210826	slbo	-8219	intergenic	34	0.209877	12	G	A	G	0.65426	43.8165	3.60661e-11	3R	17026185	SNF4Agamma	SNF4Agamma-in	intronic	73	0.45625	14	C	T	T
2R	20210826	betaTub60D	10200	intergenic	34	0.209877	12	G	A	G	0.65426	43.8165	3.60661e-11	3R	17026185	SNF4Agamma	SNF4Agamma-in	intronic	73	0.45625	14	C	T	T
3R	7918287	dpr17	-2313	intergenic	71	0.44375	13	C	T	T	0.52433	43.8072	3.62361e-11	3R	17416122	InR	InR-in	intronic	57	0.358491	18	C	T	C
3R	7918287	dpr17	-2313	intergenic	71	0.44375	13	C	T	T	0.52433	43.8072	3.62361e-11	3R	17416122	InR	InR-in	intronic	57	0.358491	18	C	T	C
3R	7918287	CG14741	15089	intergenic	71	0.44375	13	C	T	T	0.52433	43.8072	3.62361e-11	3R	17416122	InR	InR-in	intronic	57	0.358491	18	C	T	C
3R	7918287	CG14741	15089	intergenic	71	0.44375	13	C	T	T	0.52433	43.8072	3.62361e-11	3R	17416122	InR	InR-in	intronic	57	0.358491	18	C	T	C
X	17566673	CG32556	CG32556-u3	UTR	76	0.47205	7	G	A	A	0.64307	43.7929	3.65037e-11	3R	13534435	osa	osa-in	intronic	32	0.195122	19	G	A	G
2R	14686962	l(2)08717		intronic	40	0.240964	15	G	C	G	0.65073	43.7772	3.67973e-11	2R	14169092	sbb	sbb-in	intronic	36	0.216867	16	T	C	T
2R	20210826	slbo	-8219	intergenic	34	0.209877	12	G	A	G	-0.64055	43.7672	3.6985e-11	3R	17026173	SNF4Agamma	SNF4Agamma-in	intronic	74	0.45679	16	T	G	G
2R	20210826	betaTub60D	10200	intergenic	34	0.209877	12	G	A	G	-0.64055	43.7672	3.6985e-11	3R	17026173	SNF4Agamma	SNF4Agamma-in	intronic	74	0.45679	16	T	G	G
3L	4520274	Tie	Tie-in	intronic	29	0.176829	7	T	C	C	0.66871	43.5635	4.10426e-11	3L	13239899	caps	caps-in	intronic	62	0.3875	13	G	C	G
2L	12704998	spict	spict-cds	synonymous	57	0.354037	15	A	G	G	-0.57092	43.4684	4.30862e-11	X	13308207	Set2	Set2-cds	synonymous	61	0.36747	11	C	T	C
X	13308207	Set2	Set2-cds	synonymous	61	0.36747	11	C	T	C	-0.57092	43.4684	4.30862e-11	2L	12704998	spict	spict-cds	synonymous	57	0.354037	15	A	G	G
2L	9228841	tai	tai-in	intronic	63	0.406452	13	T	C	C	-0.62331	43.454	4.34037e-11	2R	1595616	ap	ap-in	intronic	45	0.283019	15	A	G	A
2L	19594999	Lar	-11570	intergenic	43	0.275641	13	G	T	T	0.55737	43.3993	4.46343e-11	X	2586532	per	per-u3	UTR	73	0.437126	17	T	A	T
2L	19594999	CG10366	8559	intergenic	43	0.275641	13	G	T	T	0.55737	43.3993	4.46343e-11	X	2586532	per	per-u3	UTR	73	0.437126	17	T	A	T
2R	13806981	PpY-55A	-35919	intergenic	26	0.164557	8	T	A	A	0.72127	43.3928	4.47839e-11	2R	13704241	grh	grh-in	intronic	56	0.352201	14	C	A	A
2R	13806981	CG14491	23898	intergenic	26	0.164557	8	T	A	A	0.72127	43.3928	4.47839e-11	2R	13704241	grh	grh-in	intronic	56	0.352201	14	C	A	A
2R	13806981	elk	elk-in	intronic	26	0.164557	8	T	A	A	0.72127	43.3928	4.47839e-11	2R	13704241	grh	grh-in	intronic	56	0.352201	14	C	A	A
2R	7513324	CG9005	CG9005-in	intronic	48	0.294479	22	C	T	T	-0.54174	43.3033	4.68784e-11	2R	14122211	fj	fj-PA	synonymous	80	0.496894	12	G	A	A
3L	18614377	not	not-in	intronic	32	0.198758	19	C	G	G	-0.64619	43.2869	4.72738e-11	3R	12102455	gish	gish-in	intronic	53	0.341935	12	A	T	T
2R	7513378	CG9005	CG9005-in	intronic	50	0.304878	20	A	T	T	-0.53442	43.1907	4.96572e-11	2R	14122211	fj	fj-PA	synonymous	80	0.496894	12	G	A	A
2R	8303276	CG13157	-684	intergenic	54	0.335404	21	T	A	T	-0.5259	43.1805	4.99161e-11	2L	10327106	RnrL	RnrL-PA	synonymous	78	0.484472	21	C	T	C
2R	8303276	Cpr49Ah	601	intergenic	54	0.335404	21	T	A	T	-0.5259	43.1805	4.99161e-11	2L	10327106	RnrL	RnrL-PA	synonymous	78	0.484472	21	C	T	C
3R	24976742	ligatin	ligatin-PA	synonymous	64	0.395062	12	A	T	A	0.51829	43.1346	5.1101e-11	3R	16991081	SNF4Agamma	SNF4Agamma-in	intronic	46	0.296774	14	C	T	C
X	2544025	sgg	sgg-in	intronic	37	0.220238	19	T	G	G	0.68726	43.1192	5.15047e-11	2R	9842598	AGO1	AGO1-in	intronic	30	0.182927	17	C	T	C
2R	7651359	CG13193	-4599	intergenic	46	0.277108	12	C	T	C	0.56458	43.0912	5.22476e-11	2L	12607833	nub	nub-in	intronic	58	0.367089	7	A	T	T
2R	7651359	pyr	37509	intergenic	46	0.277108	12	C	T	C	0.56458	43.0912	5.22476e-11	2L	12607833	nub	nub-in	intronic	58	0.367089	7	A	T	T
2R	10338023	Oaz	Oaz-in	intergenic	47	0.291925	17	A	C	A	-0.68448	43.034	5.37974e-11	3L	18169407	W	W-in	intronic	27	0.166667	19	G	A	G
2R	3794779	CG30377	CG30377:4	missense	56	0.35	9	A	G	A	-0.54746	43.0086	5.45003e-11	3L	20925217	fng	fng-in	intronic	59	0.375796	13	C	G	C
2L	8163568	CG8486	CG8486-in	intronic	42	0.264151	21	G	C	G	0.71771	42.9782	5.53523e-11	2R	7076004	shn	shn-in	intronic	39	0.240741	17	A	G	A
3R	16920921	RhoGAP93B	RhoGAP93B-in	intronic	40	0.248447	18	C	A	A	0.62626	42.883	5.8115e-11	2L	7418667	chm	chm-in	intronic	41	0.257862	12	A	C	A
2L	14605284	osp	osp-in	intronic	42	0.269231	18	T	C	T	-0.72605	42.7849	6.11011e-11	3L	7996714	nmo	nmo-in	RNA	37	0.22561	16	C	T	C
2L	14607001	osp	osp-in	intronic	56	0.35443	15	T	C	T	-0.68802	42.6325	6.60534e-11	3L	7996714	nmo	nmo-in	RNA	37	0.22561	16	C	T	C
3R	20459262	CG5794	-2918	intergenic	67	0.421384	21	C	T	C	-0.60756	42.6016	6.71054e-11	3R	12100941	gish	gish-in	intronic	36	0.225	19	C	A	A
3R	20459262	Wsck	3452	intergenic	67	0.421384	21	C	T	C	-0.60756	42.6016	6.71054e-11	3R	12100941	gish	gish-in	intronic	36	0.225	19	C	A	A
3R	20459262	atl	atl-in	intronic	67	0.421384	21	C	T	C	-0.60756	42.6016	6.71054e-11	3R	12100941	gish	gish-in	intronic	36	0.225	19	C	A	A
X	16910133	CG12433	-6204	intergenic	35	0.213415	8	A	G	A	-0.61121	42.5945	6.73467e-11	2L	5244381	tkv	tkv-in	intronic	61	0.383648	20	C	T	C
X	16910133	CG9059	1030	intergenic	35	0.213415	8	A	G	A	-0.61121	42.5945	6.73467e-11	2L	5244381	tkv	tkv-in	intronic	61	0.383648	20	C	T	C
2R	18675275	blw	-11286	intergenic	79	0.496855	12	T	G	T	0.61617	42.5417	6.91901e-11	2R	2008321	EcR	EcR-in	intronic	35	0.213415	20	G	T	G
2R	18675275	CG30270	2834	intergenic	79	0.496855	12	T	G	T	0.61617	42.5417	6.91901e-11	2R	2008321	EcR	EcR-in	intronic	35	0.213415	20	G	T	G
2R	18675275	CG42260	CG42260-in	intronic	79	0.496855	12	T	G	T	0.61617	42.5417	6.91901e-11	2R	2008321	EcR	EcR-in	intronic	35	0.213415	20	G	T	G
3L	7816725	Pdp1	Pdp1-in	intronic	10	0.0641026	11	T	G	T	0.76575	42.5034	7.05606e-11	2L	379873	al	al-in	intronic	81	0.5	16	T	G	T
2R	18284303	CG3624	CG3624-in	intronic	29	0.18125	11	T	C	T	-0.84049	42.4799	7.14122e-11	2R	18030064	a	a-in	intronic	19	0.116564	20	T	G	G
2L	6247407	Ddr	-5716	intergenic	53	0.33758	14	C	T	C	-0.84259	42.4761	7.15523e-11	2R	18044617	a	a-in	intronic	17	0.10241	13	C	A	C
2L	6247407	Ugt37b1	20565	intergenic	53	0.33758	14	C	T	C	-0.84259	42.4761	7.15523e-11	2R	18044617	a	a-in	intronic	17	0.10241	13	C	A	C
2L	14603017	osp	osp:7	synonymous	55	0.350318	18	G	T	G	-0.67917	42.4249	7.34475e-11	3L	7996714	nmo	nmo-in	RNA	37	0.22561	16	C	T	C
3L	18351578	rpr	-39075	intergenic	41	0.259494	7	A	C	A	0.60922	42.3869	7.48898e-11	2R	9821846	shot	shot-in	intronic	71	0.446541	10	T	A	A
3L	18351578	grim	54064	intergenic	41	0.259494	7	A	C	A	0.60922	42.3869	7.48898e-11	2R	9821846	shot	shot-in	intronic	71	0.446541	10	T	A	A
X	2544094	sgg	sgg-in	intronic	37	0.220238	17	G	A	A	0.69906	42.3359	7.68705e-11	2R	9842598	AGO1	AGO1-in	intronic	30	0.182927	17	C	T	C
2R	17550619	CG42362	-1319	intergenic	31	0.185629	17	T	A	T	0.57481	42.3029	7.81772e-11	3R	25285352	Ptp99A	Ptp99A-in	intronic	80	0.493827	11	C	T	T
2R	17550619	pirk	870	intergenic	31	0.185629	17	T	A	T	0.57481	42.3029	7.81772e-11	3R	25285352	Ptp99A	Ptp99A-in	intronic	80	0.493827	11	C	T	T
X	7759031	Ir7b	Ir7b-cds	missense	42	0.251497	11	T	C	T	0.60822	42.2763	7.92475e-11	2R	12467911	Cdk4	Cdk4-u5	UTR	47	0.286585	17	A	G	G
X	7759031	Ir7b	Ir7b-cds	missense	42	0.251497	11	T	C	T	0.60822	42.2763	7.92475e-11	2R	12467911	Cdk4	Cdk4-u5	UTR	47	0.286585	17	A	G	G
X	7759059	Ir7b	Ir7b-cds	synonymous	44	0.263473	10	G	A	G	0.59589	42.2751	7.92954e-11	2R	12467887	Cdk4	Cdk4-u5	UTR	52	0.33121	17	G	A	A
X	7759059	Ir7b	Ir7b-cds	synonymous	44	0.263473	10	G	A	G	0.59589	42.2751	7.92954e-11	2R	12467887	Cdk4	Cdk4-u5	UTR	52	0.33121	17	G	A	A
2R	20996148	CG30430	-20807	intergenic	75	0.454545	21	C	T	T	-0.4995	42.2707	7.94722e-11	3R	20476163	ash2	ash2:4	synonymous	70	0.4375	18	T	G	G
2R	20996148	CG16778	9460	intergenic	75	0.454545	21	C	T	T	-0.4995	42.2707	7.94722e-11	3R	20476163	ash2	ash2:4	synonymous	70	0.4375	18	T	G	G
2L	14606846	osp	osp-in	intronic	50	0.318471	9	C	T	C	-0.69317	42.2506	8.02959e-11	3L	7996714	nmo	nmo-in	RNA	37	0.22561	16	C	T	C
3R	11031880	Spn5	Spn5-in	intronic	45	0.28125	14	C	T	C	0.59917	42.1614	8.40424e-11	2L	2919970	lilli	lilli-in	intronic	76	0.484076	13	C	T	C
X	21389221	Cyp6t1	Cyp6t1-PA	missense	50	0.30303	12	G	A	A	-0.54904	42.1584	8.41712e-11	3R	6403430	hth	hth-in	intronic	73	0.464968	18	G	A	G
3L	4613079	Src64B	Src64B-u5	intronic	15	0.0898204	11	C	T	C	0.89981	42.142	8.48822e-11	2R	12473572	Cdk4	619	intergenic	64	0.4	13	C	T	C
3L	4613079	Src64B	Src64B-u5	intronic	15	0.0898204	11	C	T	C	0.89981	42.142	8.48822e-11	2R	12473572	Cdk4	619	intergenic	64	0.4	13	C	T	C
2L	14606967	osp	osp-in	intronic	56	0.35443	13	C	T	C	-0.68953	42.1375	8.50737e-11	3L	7996714	nmo	nmo-in	RNA	37	0.22561	16	C	T	C
3R	13794335	cpo	cpo-u3	UTR	65	0.408805	11	G	A	A	-0.54871	42.1239	8.56687e-11	2L	699818	ds	ds-in	intronic	52	0.325	11	G	A	A
3R	13794335	CG42457	CG42457-in	UTR	65	0.408805	11	G	A	A	-0.54871	42.1239	8.56687e-11	2L	699818	ds	ds-in	intronic	52	0.325	11	G	A	A
3R	13794335	cpo	cpo-u3	UTR	65	0.408805	11	G	A	A	-0.54871	42.1239	8.56687e-11	2L	699818	ds	ds-in	intronic	52	0.325	11	G	A	A
3R	13794335	CG42457	CG42457-in	UTR	65	0.408805	11	G	A	A	-0.54871	42.1239	8.56687e-11	2L	699818	ds	ds-in	intronic	52	0.325	11	G	A	A
2L	8604908	tRNA:CR31602	-15120	intergenic	25	0.151515	15	G	A	G	0.7154	42.1165	8.59955e-11	2R	6598088	stan	stan:5	synonymous	74	0.459627	23	A	G	A
2L	8604908	tRNA:CR31895	33948	intergenic	25	0.151515	15	G	A	G	0.7154	42.1165	8.59955e-11	2R	6598088	stan	stan:5	synonymous	74	0.459627	23	A	G	A
2L	8604908	Sema-1a	Sema-1a-in	intronic	25	0.151515	15	G	A	G	0.7154	42.1165	8.59955e-11	2R	6598088	stan	stan:5	synonymous	74	0.459627	23	A	G	A
3L	16350715	CG4893	CG4893-in	intronic	33	0.2	15	C	A	C	-0.67817	42.1078	8.63758e-11	2R	17244198	cv-2	cv-2-PA	missense	38	0.238994	14	G	A	G
3L	11101929	CG34012	CG34012-u3	intergenic	55	0.335366	15	A	G	A	0.50111	42.0663	8.82295e-11	3L	3361114	kst	kst:14	synonymous	60	0.359281	18	C	A	A
3R	11027133	CG42542	CG42542-in	intronic	76	0.484076	11	A	T	A	-0.60605	42.0655	8.82684e-11	2R	2008321	EcR	EcR-in	intronic	35	0.213415	20	G	T	G
X	20429381	RunxB	RunxB-in	intronic	71	0.427711	12	A	G	A	-0.54869	42.0592	8.85507e-11	2L	3946910	fred	fred-in	intronic	38	0.238994	12	T	G	G
2R	5212776	CG13739	CG13739-in	intronic	77	0.496774	15	C	A	C	-0.58865	41.9795	9.22339e-11	X	13094630	sno	sno:9	synonymous	42	0.254545	11	T	C	T
2R	18196217	wdp	wdp-in	intronic	62	0.3875	19	C	T	T	-0.56003	41.9648	9.29323e-11	2L	5308418	vri	vri-cds	synonymous	48	0.307692	16	C	A	C
X	21393222	CG14476	-78405	intergenic	60	0.368098	9	G	T	T	0.50677	41.9613	9.30967e-11	3R	6404811	hth	hth-in	intronic	59	0.364198	13	T	C	T
X	21393222	CG32822	165	intergenic	60	0.368098	9	G	T	T	0.50677	41.9613	9.30967e-11	3R	6404811	hth	hth-in	intronic	59	0.364198	13	T	C	T
3L	4077410	Gad1	Gad1-in	intronic	66	0.4	9	G	C	G	-0.66486	41.9532	9.34855e-11	3L	18169407	W	W-in	intronic	27	0.166667	19	G	A	G
X	17906286	CG6867	-11618	intergenic	74	0.445783	8	A	C	A	-0.66867	41.9285	9.46733e-11	2R	18163261	dve	dve-in	intronic	27	0.164634	19	C	G	C
X	17906286	CG12672	4761	intergenic	74	0.445783	8	A	C	A	-0.66867	41.9285	9.46733e-11	2R	18163261	dve	dve-in	intronic	27	0.164634	19	C	G	C
X	17906286	Sh	Sh-in	intronic	74	0.445783	8	A	C	A	-0.66867	41.9285	9.46733e-11	2R	18163261	dve	dve-in	intronic	27	0.164634	19	C	G	C
X	381704	CG3156	-268	intergenic	78	0.467066	11	A	G	A	0.49367	41.8643	9.78311e-11	3R	23004926	Ser	Ser-in	intronic	75	0.46875	14	G	T	T
X	381704	CG18273	117	intergenic	78	0.467066	11	A	G	A	0.49367	41.8643	9.78311e-11	3R	23004926	Ser	Ser-in	intronic	75	0.46875	14	G	T	T
2R	18675097	blw	-11464	intergenic	76	0.487179	12	C	T	T	-0.61069	41.8484	9.86339e-11	2R	2008321	EcR	EcR-in	intronic	35	0.213415	20	G	T	G
2R	18675097	CG30270	2656	intergenic	76	0.487179	12	C	T	T	-0.61069	41.8484	9.86339e-11	2R	2008321	EcR	EcR-in	intronic	35	0.213415	20	G	T	G
2R	18675097	CG42260	CG42260-in	intronic	76	0.487179	12	C	T	T	-0.61069	41.8484	9.86339e-11	2R	2008321	EcR	EcR-in	intronic	35	0.213415	20	G	T	G
X	13617763	mus101	mus101-PA	synonymous	48	0.298137	11	A	G	A	-0.51191	41.829	9.96131e-11	2L	10817504	Nos	Nos-in	intronic	66	0.420382	14	C	T	T
X	5442496	Vsx2	Vsx2-in	intronic	66	0.402439	15	G	A	G	-0.56527	41.7874	1.01758e-10	2L	3937381	fred	fred-in	intronic	41	0.253086	9	C	A	C
2L	1144314	CG4726	CG4726-in	intronic	49	0.308176	9	C	T	C	0.71744	41.7762	1.02344e-10	3R	12889906	Dad	Dad-in	intronic	28	0.169697	16	A	T	A
3L	9595572	CG3306	CG3306-u3	UTR	67	0.406061	25	T	G	T	0.49945	41.7605	1.03167e-10	3L	13271686	caps	caps-u3	UTR	52	0.329114	7	A	T	A
3R	4844616	tgo	tgo-PA	synonymous	51	0.326923	13	G	A	G	-0.54652	41.7604	1.03173e-10	3L	12606102	caup	caup-in	intronic	82	0.49697	11	C	A	C
3L	7816733	Pdp1	Pdp1-in	intronic	15	0.0920245	9	T	A	T	0.73709	41.6982	1.06506e-10	2L	379692	al	al-in	intronic	73	0.453416	16	A	G	A
2R	19074874	CG3162	-22774	intergenic	29	0.174699	15	C	A	C	0.75508	41.6145	1.11165e-10	2R	13712144	grh	grh-in	intronic	37	0.22561	15	T	C	T
2R	19074874	CG13539	2063	intergenic	29	0.174699	15	C	A	C	0.75508	41.6145	1.11165e-10	2R	13712144	grh	grh-in	intronic	37	0.22561	15	T	C	T
2R	19074874	CG34371	CG34371-in	intronic	29	0.174699	15	C	A	C	0.75508	41.6145	1.11165e-10	2R	13712144	grh	grh-in	intronic	37	0.22561	15	T	C	T
3R	17370796	slou	-3579	intergenic	50	0.326797	13	T	C	C	-0.5417	41.5836	1.12937e-10	2L	5229924	tkv	tkv-in	intronic	59	0.373418	15	C	T	C
3R	17370796	CG15499	12907	intergenic	50	0.326797	13	T	C	C	-0.5417	41.5836	1.12937e-10	2L	5229924	tkv	tkv-in	intronic	59	0.373418	15	C	T	C
2L	1144314	CG4726	CG4726-in	intronic	49	0.308176	9	C	T	C	0.71507	41.5798	1.13154e-10	3R	12889987	Dad	Dad-in	intronic	27	0.163636	16	A	T	A
3L	11681142	Sug	Sug:5	synonymous	44	0.271605	16	T	C	C	0.58131	41.5138	1.17039e-10	2R	11713270	Poxn	-928	intergenic	56	0.339394	19	C	T	T
3L	7631240	CG33275	CG33275-in	intronic	80	0.481928	19	C	T	C	-0.6027	41.5098	1.17281e-10	3L	14070581	btl	btl-in	intronic	33	0.20625	11	C	G	C
X	13835913	CG11068	-13371	intergenic	40	0.240964	12	C	A	C	0.58833	41.5072	1.17437e-10	2R	16709582	insc	insc-u3	UTR	59	0.359756	17	T	C	C
X	13835913	CG32606	26776	intergenic	40	0.240964	12	C	A	C	0.58833	41.5072	1.17437e-10	2R	16709582	insc	insc-u3	UTR	59	0.359756	17	T	C	C
X	13835913	mamo	mamo-in	intronic	40	0.240964	12	C	A	C	0.58833	41.5072	1.17437e-10	2R	16709582	insc	insc-u3	UTR	59	0.359756	17	T	C	C
3L	4833213	CG13707	-4866	intergenic	53	0.317365	9	C	T	C	0.50627	41.4989	1.17939e-10	3L	7523134	lqf	lqf-in	intronic	74	0.448485	12	A	T	T
3L	4833213	CG13708	139	intergenic	53	0.317365	9	C	T	C	0.50627	41.4989	1.17939e-10	3L	7523134	lqf	lqf-in	intronic	74	0.448485	12	A	T	T
3R	11024410	CG42542	CG42542-in	intronic	66	0.404908	17	C	T	T	0.58335	41.4983	1.17972e-10	2R	2008321	EcR	EcR-in	intronic	35	0.213415	20	G	T	G
X	17573251	CG32556	CG32556-in	intronic	44	0.263473	10	C	A	C	-0.83438	41.4939	1.18237e-10	2R	18044617	a	a-in	intronic	17	0.10241	13	C	A	C
X	17311067	CG8611	CG8611-in	intronic	45	0.269461	15	G	T	G	-0.56529	41.4697	1.19711e-10	X	7535575	ct	ct-in	intronic	46	0.277108	9	T	C	T
3L	7816725	Pdp1	Pdp1-in	intronic	10	0.0641026	11	T	G	T	0.7116	41.4459	1.21182e-10	X	18441927	Bx	Bx-in	intronic	81	0.48503	12	G	A	G
3R	24133732	larp	-10164	intergenic	65	0.40625	20	C	T	C	0.5314	41.4169	1.22989e-10	X	13308207	Set2	Set2-cds	synonymous	61	0.36747	11	C	T	C
3R	24133732	CG12516	3405	intergenic	65	0.40625	20	C	T	C	0.5314	41.4169	1.22989e-10	X	13308207	Set2	Set2-cds	synonymous	61	0.36747	11	C	T	C
3R	6381124	hth	hth-in	intronic	50	0.314465	9	G	A	A	-0.57068	41.4014	1.23969e-10	2R	15554268	hrg	hrg:6	synonymous	58	0.358025	20	G	T	T
2R	15554268	hrg	hrg:6	synonymous	58	0.358025	20	G	T	T	-0.57068	41.4014	1.23969e-10	3R	6381124	hth	hth-in	intronic	50	0.314465	9	G	A	A
3R	11372810	CG6045	CG6045-in	intronic	40	0.248447	17	T	A	T	-0.65766	41.4006	1.24018e-10	3L	1462986	rho	-806	intergenic	30	0.181818	14	A	T	T
3L	16311669	Nplp3	Nplp3-u3	UTR	51	0.31677	18	T	C	T	-0.53422	41.3968	1.24262e-10	3R	21814028	Nf1	Nf1-in	intronic	78	0.4875	17	G	A	A
3L	13236500	caps	caps-in	intronic	73	0.480263	11	A	T	T	0.51899	41.3867	1.24904e-10	X	1543481	br	br-in	intronic	52	0.309524	14	T	A	T
X	1543481	br	br-in	intronic	52	0.309524	14	T	A	T	0.51899	41.3867	1.24904e-10	3L	13236500	caps	caps-in	intronic	73	0.480263	11	A	T	T
2L	4861812	pog	pog-in	intronic	69	0.425926	16	A	G	A	-0.6057	41.3637	1.2638e-10	2R	9353528	arr	arr-in	intronic	28	0.178344	5	A	T	A
X	12835309	fne	fne-in	intronic	76	0.463415	13	A	G	A	0.51157	41.3537	1.27034e-10	2R	12470720	Cdk4	Cdk4-in	intronic	61	0.378882	15	A	C	A
X	12835309	fne	fne-in	intronic	76	0.463415	13	A	G	A	0.51157	41.3537	1.27034e-10	2R	12470720	Cdk4	Cdk4-in	intronic	61	0.378882	15	A	C	A
3L	11679252	Sug	Sug:2	synonymous	83	0.5	13	T	C	T	0.65206	41.3492	1.27327e-10	3L	8444537	Gug	Gug-in	intronic	15	0.100671	8	G	A	G
3R	18445574	loco	-116	intergenic	78	0.4875	11	T	C	C	0.80922	41.3438	1.27677e-10	2R	18044617	a	a-in	intronic	17	0.10241	13	C	A	C
3R	18445574	mRpL45	26	intergenic	78	0.4875	11	T	C	C	0.80922	41.3438	1.27677e-10	2R	18044617	a	a-in	intronic	17	0.10241	13	C	A	C
X	20583146	CG1324	-22625	intergenic	10	0.0680272	8	G	A	G	0.70967	41.3386	1.28018e-10	2L	1698744	chinmo	127	intergenic	50	0.314465	10	G	T	G
X	20583146	run	14798	intergenic	10	0.0680272	8	G	A	G	0.70967	41.3386	1.28018e-10	2L	1698744	chinmo	127	intergenic	50	0.314465	10	G	T	G
2R	9748068	CG16935	CG16935-PA	synonymous	42	0.257669	19	C	T	C	0.59221	41.3349	1.28256e-10	2L	1689241	chinmo	chinmo-in	intronic	52	0.335484	13	T	C	C
X	7759221	Ir7b	Ir7b-cds	synonymous	38	0.228916	11	G	T	G	0.64301	41.3161	1.29497e-10	2R	12467887	Cdk4	Cdk4-u5	UTR	52	0.33121	17	G	A	A
X	7759221	Ir7b	Ir7b-cds	synonymous	38	0.228916	11	G	T	G	0.64301	41.3161	1.29497e-10	2R	12467887	Cdk4	Cdk4-u5	UTR	52	0.33121	17	G	A	A
2R	9727975	CG6357	CG6357:2	synonymous	45	0.277778	23	G	A	G	-0.65486	41.312	1.29773e-10	2L	12619222	nub	nub-in	intronic	33	0.214286	8	C	A	C
2L	20469364	mir-1	-18077	intergenic	22	0.134146	12	A	G	A	-0.8363	41.3066	1.30128e-10	2R	9792455	shot	shot:32	synonymous	50	0.3125	11	A	T	T
2L	20469364	CG2493	5915	intergenic	22	0.134146	12	A	G	A	-0.8363	41.3066	1.30128e-10	2R	9792455	shot	shot:32	synonymous	50	0.3125	11	A	T	T
2R	18270447	CG13506	-194	intergenic	52	0.333333	17	T	G	T	0.79421	41.2871	1.31434e-10	3L	12730661	Ptp69D	Ptp69D:3	synonymous	23	0.137725	20	T	C	T
2R	18270447	wrapper	256	intergenic	52	0.333333	17	T	G	T	0.79421	41.2871	1.31434e-10	3L	12730661	Ptp69D	Ptp69D:3	synonymous	23	0.137725	20	T	C	T
2R	7417128	tou	-49257	intergenic	51	0.31677	22	T	C	T	0.75321	41.2801	1.31906e-10	3L	3862535	Awh	838	intergenic	19	0.113772	13	G	A	G
2R	7417128	en	1413	intergenic	51	0.31677	22	T	C	T	0.75321	41.2801	1.31906e-10	3L	3862535	Awh	838	intergenic	19	0.113772	13	G	A	G
2R	10500415	Su(var)2-HP2		synonymous	59	0.364198	18	G	T	T	-0.59453	41.2582	1.33391e-10	2R	9912214	mam	mam-in	intronic	43	0.267081	14	G	C	G
2R	20996148	CG30430	-20807	intergenic	75	0.454545	21	C	T	T	-0.49968	41.1692	1.39602e-10	3R	20476223	ash2	ash2:4	synonymous	70	0.4375	18	C	T	T
2R	20996148	CG16778	9460	intergenic	75	0.454545	21	C	T	T	-0.49968	41.1692	1.39602e-10	3R	20476223	ash2	ash2:4	synonymous	70	0.4375	18	C	T	T
2R	17550538	CG42362	-1400	intergenic	32	0.191617	16	A	C	A	0.56073	41.1673	1.39738e-10	3R	25285352	Ptp99A	Ptp99A-in	intronic	80	0.493827	11	C	T	T
2R	17550540	CG42362	-1398	intergenic	32	0.191617	17	T	G	T	0.56073	41.1673	1.39738e-10	3R	25285352	Ptp99A	Ptp99A-in	intronic	80	0.493827	11	C	T	T
2R	17550538	pirk	789	intergenic	32	0.191617	16	A	C	A	0.56073	41.1673	1.39738e-10	3R	25285352	Ptp99A	Ptp99A-in	intronic	80	0.493827	11	C	T	T
2R	17550540	pirk	791	intergenic	32	0.191617	17	T	G	T	0.56073	41.1673	1.39738e-10	3R	25285352	Ptp99A	Ptp99A-in	intronic	80	0.493827	11	C	T	T
3L	5354556	CG4769	CG4769-in	intronic	46	0.277108	18	A	T	A	0.54978	41.1472	1.41182e-10	X	13308419	Set2	Set2-cds	missense	60	0.361446	14	G	C	G
3L	11700743	CG11658	CG11658-in	intronic	73	0.442424	11	C	T	T	-0.49621	41.0832	1.45886e-10	3L	2757068	Mrtf	Mrtf-in	intronic	66	0.392857	20	A	T	A
X	16552225	r	r:3	synonymous	68	0.409639	10	C	T	C	0.67317	41.083	1.45898e-10	2R	18262966	Rtf1	Rtf1:2	synonymous	36	0.218182	11	C	T	C
X	17929782	CG15373	-8322	intergenic	39	0.232143	10	G	T	G	0.85665	41.0401	1.49136e-10	3R	7473277	Csk	Csk-in	intronic	27	0.171975	11	A	G	A
X	17929782	CG15373	-8322	intergenic	39	0.232143	10	G	T	G	0.85665	41.0401	1.49136e-10	3R	7473277	Csk	Csk-in	intronic	27	0.171975	11	A	G	A
X	17929782	CG6867	7488	intergenic	39	0.232143	10	G	T	G	0.85665	41.0401	1.49136e-10	3R	7473277	Csk	Csk-in	intronic	27	0.171975	11	A	G	A
X	17929782	CG6867	7488	intergenic	39	0.232143	10	G	T	G	0.85665	41.0401	1.49136e-10	3R	7473277	Csk	Csk-in	intronic	27	0.171975	11	A	G	A
X	17929782	Sh	Sh-in	intronic	39	0.232143	10	G	T	G	0.85665	41.0401	1.49136e-10	3R	7473277	Csk	Csk-in	intronic	27	0.171975	11	A	G	A
X	17929782	Sh	Sh-in	intronic	39	0.232143	10	G	T	G	0.85665	41.0401	1.49136e-10	3R	7473277	Csk	Csk-in	intronic	27	0.171975	11	A	G	A
3R	27235838	Gprk2	Gprk2-in	intronic	50	0.310559	12	T	G	T	0.58387	41.026	1.50222e-10	3L	2734339	Mrtf	Mrtf-in	intronic	53	0.33758	8	G	T	G
3R	24637209	CG1646	-617	intergenic	73	0.462025	12	C	T	T	0.56194	41.0218	1.50544e-10	2L	2440487	dpp	dpp-in	intronic	45	0.283019	13	T	C	T
3R	24637209	wdn	160	intergenic	73	0.462025	12	C	T	T	0.56194	41.0218	1.50544e-10	2L	2440487	dpp	dpp-in	intronic	45	0.283019	13	T	C	T
3L	11064506	Mocs1	Mocs1-in	intronic	31	0.184524	13	C	T	C	-0.64819	40.9714	1.54471e-10	2L	1056969	S	S-in	intronic	50	0.3125	15	C	T	T
2R	17002897	king-tubby	king-tubby-in	intronic	78	0.478528	15	C	G	G	-0.67774	40.9494	1.56219e-10	X	3035344	N	N-in	intronic	26	0.156627	8	C	T	C
3L	11101928	CG34012	CG34012-u3	intergenic	54	0.331288	15	T	G	T	0.50181	40.9485	1.56297e-10	3L	3361114	kst	kst:14	synonymous	60	0.359281	18	C	A	A
X	17929782	CG15373	-8322	intergenic	39	0.232143	10	G	T	G	0.85394	40.8915	1.60919e-10	3R	7473274	Csk	Csk-in	intronic	27	0.171975	10	A	T	A
X	17929782	CG15373	-8322	intergenic	39	0.232143	10	G	T	G	0.85394	40.8915	1.60919e-10	3R	7473274	Csk	Csk-in	intronic	27	0.171975	10	A	T	A
X	17929782	CG6867	7488	intergenic	39	0.232143	10	G	T	G	0.85394	40.8915	1.60919e-10	3R	7473274	Csk	Csk-in	intronic	27	0.171975	10	A	T	A
X	17929782	CG6867	7488	intergenic	39	0.232143	10	G	T	G	0.85394	40.8915	1.60919e-10	3R	7473274	Csk	Csk-in	intronic	27	0.171975	10	A	T	A
X	17929782	Sh	Sh-in	intronic	39	0.232143	10	G	T	G	0.85394	40.8915	1.60919e-10	3R	7473274	Csk	Csk-in	intronic	27	0.171975	10	A	T	A
X	17929782	Sh	Sh-in	intronic	39	0.232143	10	G	T	G	0.85394	40.8915	1.60919e-10	3R	7473274	Csk	Csk-in	intronic	27	0.171975	10	A	T	A
3L	16311669	Nplp3	Nplp3-u3	UTR	51	0.31677	18	T	C	T	-0.52312	40.8841	1.6153e-10	3R	21814110	Nf1	Nf1:10	synonymous	78	0.481481	19	T	C	C
3R	23955654	CG34354	-16892	intergenic	20	0.121951	14	A	G	A	-0.78392	40.8732	1.62431e-10	X	7962837	mys	mys-in	intronic	70	0.47619	17	T	C	T
3R	23955654	CG34362	44170	intergenic	20	0.121951	14	A	G	A	-0.78392	40.8732	1.62431e-10	X	7962837	mys	mys-in	intronic	70	0.47619	17	T	C	T
3R	19030704	CG13826	-17182	intergenic	70	0.454545	9	C	A	C	0.60821	40.8488	1.64478e-10	3L	5833358	vn	vn-in	intronic	34	0.203593	19	T	C	C
3R	19030704	fzo	948	intergenic	70	0.454545	9	C	A	C	0.60821	40.8488	1.64478e-10	3L	5833358	vn	vn-in	intronic	34	0.203593	19	T	C	C
3R	19030704	cnc	cnc-in	intronic	70	0.454545	9	C	A	C	0.60821	40.8488	1.64478e-10	3L	5833358	vn	vn-in	intronic	34	0.203593	19	T	C	C
3R	15614825	tRNA:V3b:92Bb	-1019	intergenic	57	0.358491	17	T	C	T	0.56067	40.8304	1.66027e-10	3R	6336444	hth	hth-u3	UTR	49	0.304348	12	C	T	C
3R	15614825	CG11453	3573	intergenic	57	0.358491	17	T	C	T	0.56067	40.8304	1.66027e-10	3R	6336444	hth	hth-u3	UTR	49	0.304348	12	C	T	C
3R	21705381	Tsp96F	Tsp96F-in	intronic	55	0.357143	11	A	T	A	0.55114	40.8062	1.68096e-10	3R	26137332	hdc	hdc-in	intronic	49	0.308176	9	T	C	T
3L	8534531	rhea	-3526	intergenic	13	0.083871	8	A	G	A	0.69333	40.7927	1.69261e-10	3L	5798557	S6k	S6k-in	intronic	72	0.431138	20	T	C	C
3L	8534531	rhea	-3526	intergenic	13	0.083871	8	A	G	A	0.69333	40.7927	1.69261e-10	3L	5798557	S6k	S6k-in	intronic	72	0.431138	20	T	C	C
3L	8534531	ergic53	3413	intergenic	13	0.083871	8	A	G	A	0.69333	40.7927	1.69261e-10	3L	5798557	S6k	S6k-in	intronic	72	0.431138	20	T	C	C
3L	8534531	ergic53	3413	intergenic	13	0.083871	8	A	G	A	0.69333	40.7927	1.69261e-10	3L	5798557	S6k	S6k-in	intronic	72	0.431138	20	T	C	C
X	17621046	CG42684	CG42684-in	intronic	76	0.45509	9	G	A	G	-0.60757	40.7875	1.69718e-10	3L	18169407	W	W-in	intronic	27	0.166667	19	G	A	G
3L	16824746	TSG101	-10653	intergenic	28	0.173913	11	G	A	G	-0.94224	40.7819	1.70205e-10	2L	5304548	vri	vri-in	intronic	18	0.109091	20	G	A	A
3L	16824746	CG13024	20779	intergenic	28	0.173913	11	G	A	G	-0.94224	40.7819	1.70205e-10	2L	5304548	vri	vri-in	intronic	18	0.109091	20	G	A	A
2L	1079417	ast	ast-cds	synonymous	47	0.288344	20	C	T	C	0.66408	40.7661	1.71586e-10	2R	9913611	mam	mam-in	intronic	36	0.219512	16	G	C	G
3L	11679252	Sug	Sug:2	synonymous	83	0.5	13	T	C	T	0.64558	40.7565	1.72432e-10	3L	8444541	Gug	Gug-in	intronic	2	0.0151515	9	G	T	G
X	21392559	CG32822	CG32822-u3	intergenic	56	0.341463	9	T	A	A	-0.56495	40.7562	1.72453e-10	3R	6390475	hth	hth-in	intronic	46	0.289308	17	T	A	A
2L	6605133	CG11050	-5890	intergenic	54	0.341772	14	C	A	C	0.55192	40.7494	1.73055e-10	2L	1072805	S	S-in	intronic	59	0.36875	13	G	T	G
2L	6605133	CG11319	4067	intergenic	54	0.341772	14	C	A	C	0.55192	40.7494	1.73055e-10	2L	1072805	S	S-in	intronic	59	0.36875	13	G	T	G
3R	4847829	neur	neur:4	synonymous	47	0.291925	20	A	G	G	-0.62617	40.7413	1.73778e-10	2L	11236069	ab	ab-in	intronic	61	0.383648	16	G	A	G
X	17573252	CG32556	CG32556-in	intronic	44	0.263473	10	T	C	T	-0.87971	40.7265	1.75097e-10	2R	18044617	a	a-in	intronic	17	0.10241	13	C	A	C
X	21461707	CG14476	-9920	intergenic	38	0.238994	7	T	C	T	-0.68398	40.702	1.77301e-10	3R	15149999	Dl	Dl-in	intronic	38	0.233129	18	A	G	A
X	21461707	CG32822	68650	intergenic	38	0.238994	7	T	C	T	-0.68398	40.702	1.77301e-10	3R	15149999	Dl	Dl-in	intronic	38	0.233129	18	A	G	A
X	4936969	ovo	-5361	intergenic	33	0.207547	6	A	G	A	0.58153	40.6642	1.80769e-10	3L	8871880	dally	dally-in	intronic	61	0.36747	17	C	T	T
X	4936969	CG12680	44750	intergenic	33	0.207547	6	A	G	A	0.58153	40.6642	1.80769e-10	3L	8871880	dally	dally-in	intronic	61	0.36747	17	C	T	T
3L	5593805	CG10590	-391	intergenic	65	0.398773	11	T	C	T	-0.60521	40.6399	1.83032e-10	2R	2008321	EcR	EcR-in	intronic	35	0.213415	20	G	T	G
3L	5593805	CG10591	1016	intergenic	65	0.398773	11	T	C	T	-0.60521	40.6399	1.83032e-10	2R	2008321	EcR	EcR-in	intronic	35	0.213415	20	G	T	G
2R	18675245	blw	-11316	intergenic	75	0.5	9	A	C	A	-0.60513	40.6357	1.83426e-10	2R	2008321	EcR	EcR-in	intronic	35	0.213415	20	G	T	G
2R	18675245	CG30270	2804	intergenic	75	0.5	9	A	C	A	-0.60513	40.6357	1.83426e-10	2R	2008321	EcR	EcR-in	intronic	35	0.213415	20	G	T	G
2R	18675245	CG42260	CG42260-in	intronic	75	0.5	9	A	C	A	-0.60513	40.6357	1.83426e-10	2R	2008321	EcR	EcR-in	intronic	35	0.213415	20	G	T	G
2L	1144314	CG4726	CG4726-in	intronic	49	0.308176	9	C	T	C	0.74802	40.6347	1.83522e-10	3R	12889291	Dad	Dad-in	intronic	26	0.159509	8	A	T	A
X	381539	CG18273	CG18273-u5	UTR	78	0.467066	18	A	G	A	0.4808	40.6268	1.84266e-10	3R	23004926	Ser	Ser-in	intronic	75	0.46875	14	G	T	T
2R	18652393	CG30270	-19416	intergenic	66	0.407407	21	G	A	A	-0.55622	40.5903	1.87736e-10	X	2859627	rst	rst-in	intronic	43	0.259036	10	G	A	A
2R	18652393	CG13527	31	intergenic	66	0.407407	21	G	A	A	-0.55622	40.5903	1.87736e-10	X	2859627	rst	rst-in	intronic	43	0.259036	10	G	A	A
2R	18652393	CG42260	CG42260-in	intronic	66	0.407407	21	G	A	A	-0.55622	40.5903	1.87736e-10	X	2859627	rst	rst-in	intronic	43	0.259036	10	G	A	A
X	5548721	CG42265	CG42265:3	nonsense	61	0.371951	13	A	G	G	-0.71079	40.5865	1.88105e-10	2L	298943	Pi3K21B	Pi3K21B-in	intronic	24	0.15	6	G	A	G
3R	14876508	cdi	cdi-in	intronic	25	0.201613	16	A	G	A	0.58988	40.5751	1.89206e-10	X	15510362	sog	sog-in	intronic	39	0.233533	12	A	C	A
X	17621033	CG42684	CG42684-in	intronic	76	0.45509	10	C	T	C	-0.60433	40.5681	1.89881e-10	3L	18169407	W	W-in	intronic	27	0.166667	19	G	A	G
2R	6829678	luna	-40603	intergenic	41	0.257862	15	A	C	A	0.6044	40.5667	1.90017e-10	3L	19914643	Su(z)12		missense	46	0.289308	20	G	A	A
2R	6829678	Spn47C	472	intergenic	41	0.257862	15	A	C	A	0.6044	40.5667	1.90017e-10	3L	19914643	Su(z)12		missense	46	0.289308	20	G	A	A
X	16552225	r	r:3	synonymous	68	0.409639	10	C	T	C	0.66992	40.5556	1.91098e-10	2R	18264097	Rtf1	Rtf1:3	synonymous	36	0.215569	16	C	T	C
X	4507912	peb	-3690	intergenic	63	0.381818	14	G	T	G	-0.54254	40.5535	1.91308e-10	2L	5246326	tkv	tkv-in	intronic	57	0.360759	13	A	T	A
X	4507912	CG12684	41950	intergenic	63	0.381818	14	G	T	G	-0.54254	40.5535	1.91308e-10	2L	5246326	tkv	tkv-in	intronic	57	0.360759	13	A	T	A
2R	12697943	CG5550	-6153	intergenic	32	0.193939	20	A	G	G	0.62465	40.5519	1.91466e-10	2L	12472435	bun	bun-in	intronic	79	0.49375	18	G	C	G
2R	12697943	CG5550	-6153	intergenic	32	0.193939	20	A	G	G	0.62465	40.5519	1.91466e-10	2L	12472435	bun	bun-in	intronic	79	0.49375	18	G	C	G
2R	12697943	CG15615	14031	intergenic	32	0.193939	20	A	G	G	0.62465	40.5519	1.91466e-10	2L	12472435	bun	bun-in	intronic	79	0.49375	18	G	C	G
2R	12697943	CG15615	14031	intergenic	32	0.193939	20	A	G	G	0.62465	40.5519	1.91466e-10	2L	12472435	bun	bun-in	intronic	79	0.49375	18	G	C	G
3R	20724644	CG13643	CG13643-PA	synonymous	68	0.425	16	A	G	A	-0.57867	40.5174	1.94868e-10	3L	4157909	nab	nab-in	intronic	45	0.27439	10	C	T	T
2R	13381654	CG30103	CG30103:2	synonymous	73	0.45625	15	C	A	C	-0.72206	40.4849	1.98141e-10	3L	3862535	Awh	838	intergenic	19	0.113772	13	G	A	G
2R	6199823	Ndg	-1600	intergenic	62	0.392405	14	A	C	C	0.51874	40.477	1.98948e-10	3R	25246214	Ptp99A	Ptp99A-in	intronic	74	0.459627	11	T	G	G
2R	6199823	Obp46a	295	intergenic	62	0.392405	14	A	C	C	0.51874	40.477	1.98948e-10	3R	25246214	Ptp99A	Ptp99A-in	intronic	74	0.459627	11	T	G	G
2L	5427123	CG31647	-8459	intergenic	41	0.259494	14	T	G	T	0.65197	40.4741	1.99242e-10	2L	3925932	fred	fred-in	intronic	41	0.25625	9	T	A	T
2L	5427123	H15	11195	intergenic	41	0.259494	14	T	G	T	0.65197	40.4741	1.99242e-10	2L	3925932	fred	fred-in	intronic	41	0.25625	9	T	A	T
3L	7138757	corn	corn-cds	missense	57	0.341317	16	C	T	C	0.57231	40.4699	1.99673e-10	3L	19693768	serp	-309	intergenic	50	0.306748	16	G	A	A
3L	10215754	scramb1	scramb1-in	intronic	65	0.40625	8	T	A	A	0.49496	40.4675	1.99917e-10	2L	379873	al	al-in	intronic	81	0.5	16	T	G	T
2L	3468652	CG3238	CG3238-PA	synonymous	29	0.179012	21	C	T	C	-0.82244	40.4654	2.00128e-10	3R	11851489	pnr	-330	intergenic	46	0.280488	19	A	G	A
3L	4613079	Src64B	Src64B-u5	intronic	15	0.0898204	11	C	T	C	0.88425	40.4266	2.04139e-10	2R	12473563	Cdk4	610	intergenic	65	0.401235	14	T	A	T
3L	4613079	Src64B	Src64B-u5	intronic	15	0.0898204	11	C	T	C	0.88425	40.4266	2.04139e-10	2R	12473563	Cdk4	610	intergenic	65	0.401235	14	T	A	T
3R	11025529	CG42542	CG42542-in	intronic	64	0.387879	16	T	C	C	0.57264	40.3842	2.0862e-10	2R	2008321	EcR	EcR-in	intronic	35	0.213415	20	G	T	G
2R	17550619	CG42362	-1319	intergenic	31	0.185629	17	T	A	T	0.5772	40.375	2.09606e-10	3R	25285330	Ptp99A	Ptp99A-in	intronic	77	0.472393	12	T	C	C
2R	17550619	pirk	870	intergenic	31	0.185629	17	T	A	T	0.5772	40.375	2.09606e-10	3R	25285330	Ptp99A	Ptp99A-in	intronic	77	0.472393	12	T	C	C
X	18271296	por	-258	intergenic	78	0.472727	9	G	A	G	-0.51373	40.3738	2.09735e-10	2L	7830437	mts	mts-in	intronic	56	0.352201	14	G	C	G
X	18271296	CrebB-17A	1212	intergenic	78	0.472727	9	G	A	G	-0.51373	40.3738	2.09735e-10	2L	7830437	mts	mts-in	intronic	56	0.352201	14	G	C	G
2R	14686962	l(2)08717		intronic	40	0.240964	15	G	C	G	0.6063	40.371	2.10033e-10	2R	14169084	sbb	sbb-in	intronic	35	0.212121	17	A	G	A
3R	15614576	tRNA:V3b:92Bb	-1268	intergenic	55	0.339506	12	A	G	A	0.557	40.3297	2.14527e-10	3R	6336444	hth	hth-u3	UTR	49	0.304348	12	C	T	C
3R	15614576	CG11453	3324	intergenic	55	0.339506	12	A	G	A	0.557	40.3297	2.14527e-10	3R	6336444	hth	hth-u3	UTR	49	0.304348	12	C	T	C
X	13416641	CG15753	CG15753-in	intronic	76	0.45509	15	T	C	T	0.58885	40.3278	2.1473e-10	2R	2008321	EcR	EcR-in	intronic	35	0.213415	20	G	T	G
3R	25054596	CG15817	-292	intergenic	43	0.265432	12	A	G	A	-0.63714	40.305	2.17255e-10	X	18460247	Bx	Bx-in	intronic	48	0.294479	10	A	C	C
3R	25054596	CG14507	1149	intergenic	43	0.265432	12	A	G	A	-0.63714	40.305	2.17255e-10	X	18460247	Bx	Bx-in	intronic	48	0.294479	10	A	C	C
3R	11025246	CG42542	CG42542-in	intronic	64	0.390244	18	G	A	A	0.58119	40.3043	2.17332e-10	2R	2008321	EcR	EcR-in	intronic	35	0.213415	20	G	T	G
2L	19863767	sick	sick-in	intronic	46	0.291139	18	G	C	G	0.55833	40.2946	2.18412e-10	3L	8877287	dally	dally-in	intronic	51	0.310976	18	T	C	C
2R	17052244	CG4266	CG4266:4	synonymous	32	0.193939	24	G	A	G	0.60889	40.2904	2.18887e-10	3R	1347071	Itp-r83A	Itp-r83A-in	intronic	68	0.441558	12	G	A	G
3R	26336065	PH4alphaNE2	PH4alphaNE2-in	intronic	73	0.447853	14	A	G	A	-0.5098	40.2854	2.19439e-10	2L	5265511	tkv	tkv-in	synonymous	66	0.4125	23	A	G	A
2R	18589222	CG30259	CG30259-PA	missense	25	0.160256	8	T	C	C	-0.69933	40.2721	2.20942e-10	2L	243574	kis	kis-in	intronic	67	0.41875	22	T	G	T
3L	8444541	Gug	Gug-in	intronic	2	0.0151515	9	G	T	G	-0.6524	40.2376	2.24873e-10	2R	9364512	arr	arr-in	intronic	70	0.426829	15	G	T	T
2R	9364512	arr	arr-in	intronic	70	0.426829	15	G	T	T	-0.6524	40.2376	2.24873e-10	3L	8444541	Gug	Gug-in	intronic	2	0.0151515	9	G	T	G
2R	13381642	CG30103	CG30103:2	synonymous	76	0.47205	15	G	A	A	0.72919	40.2202	2.2689e-10	3L	3862535	Awh	838	intergenic	19	0.113772	13	G	A	G
3L	5283412	tRNA:S7:64D	-51772	intergenic	67	0.403614	16	G	A	A	0.60667	40.219	2.27035e-10	3R	6461741	hth	hth-in	intronic	38	0.240506	16	G	A	G
3L	5283412	CG4669	53681	intergenic	67	0.403614	16	G	A	A	0.60667	40.219	2.27035e-10	3R	6461741	hth	hth-in	intronic	38	0.240506	16	G	A	G
3L	7816733	Pdp1	Pdp1-in	intronic	15	0.0920245	9	T	A	T	-0.75757	40.194	2.2995e-10	3R	14062995	repo	repo-cds	synonymous	65	0.411392	9	C	G	C
3L	5354390	CG4769	CG4769-in	intronic	35	0.214724	10	A	C	A	0.55029	40.1858	2.30917e-10	X	13308521	Set2	Set2-cds	missense	66	0.402439	10	G	A	G
3R	23955654	CG34354	-16892	intergenic	20	0.121951	14	A	G	A	-0.77594	40.1719	2.32568e-10	X	7962882	mys	mys-in	intronic	77	0.475309	16	A	T	T
3R	23955654	CG34362	44170	intergenic	20	0.121951	14	A	G	A	-0.77594	40.1719	2.32568e-10	X	7962882	mys	mys-in	intronic	77	0.475309	16	A	T	T
X	21392764	CG32822	CG32822-u3	intergenic	56	0.335329	11	A	G	G	-0.53464	40.1343	2.37086e-10	3R	6403430	hth	hth-in	intronic	73	0.464968	18	G	A	G
3R	15758742	Hs6st	Hs6st-in	missense	49	0.304348	14	G	A	A	-0.57636	40.1221	2.38574e-10	2R	20239016	bs	bs-in	intronic	39	0.242236	15	A	C	A
3R	15758742	mira	mira-cds	missense	49	0.304348	14	G	A	A	-0.57636	40.1221	2.38574e-10	2R	20239016	bs	bs-in	intronic	39	0.242236	15	A	C	A
3R	27235832	Gprk2	Gprk2-in	intronic	48	0.3	11	T	G	T	0.56667	40.1069	2.40437e-10	3L	2734339	Mrtf	Mrtf-in	intronic	53	0.33758	8	G	T	G
2L	5388710	H15	-15632	intergenic	61	0.376543	12	G	A	A	0.59922	40.0932	2.42126e-10	X	8782714	Moe	Moe-in	intronic	37	0.221557	10	A	T	A
2L	5388710	CG42850	7656	intergenic	61	0.376543	12	G	A	A	0.59922	40.0932	2.42126e-10	X	8782714	Moe	Moe-in	intronic	37	0.221557	10	A	T	A
3L	11679252	Sug	Sug:2	synonymous	83	0.5	13	T	C	T	0.64478	40.068	2.4527e-10	3L	8444536	Gug	Gug-in	intronic	16	0.107383	9	G	A	G
3L	18240007	CheA75a	-5181	intergenic	68	0.42236	11	T	C	C	0.53847	40.0334	2.49654e-10	3R	21848896	HLHm3	47	intergenic	42	0.276316	5	A	T	A
3L	18240007	CG7320	43341	intergenic	68	0.42236	11	T	C	C	0.53847	40.0334	2.49654e-10	3R	21848896	HLHm3	47	intergenic	42	0.276316	5	A	T	A
3L	18240007	CheA75a	-5181	intergenic	68	0.42236	11	T	C	C	0.53847	40.0334	2.49654e-10	3R	21848896	m4	-652	intergenic	42	0.276316	5	A	T	A
3L	18240007	CG7320	43341	intergenic	68	0.42236	11	T	C	C	0.53847	40.0334	2.49654e-10	3R	21848896	m4	-652	intergenic	42	0.276316	5	A	T	A
3L	9562752	CG42673	CG42673-in	intronic	33	0.198795	14	T	A	T	-0.63331	40.0271	2.50461e-10	2L	7310300	wg	wg-in	intronic	62	0.397436	18	C	T	T
3R	26827961	CG33773	-33107	intergenic	36	0.222222	16	T	A	T	0.7475	40.0018	2.53732e-10	3R	10544438	kibra	kibra-in	intronic	34	0.21118	14	T	A	T
3R	26827961	CG31007	9782	intergenic	36	0.222222	16	T	A	T	0.7475	40.0018	2.53732e-10	3R	10544438	kibra	kibra-in	intronic	34	0.21118	14	T	A	T
3R	26827961	5-HT7	5-HT7-in	intronic	36	0.222222	16	T	A	T	0.7475	40.0018	2.53732e-10	3R	10544438	kibra	kibra-in	intronic	34	0.21118	14	T	A	T
2L	1553917	haf	-1242	intergenic	35	0.21875	16	T	C	T	-0.58129	39.9713	2.57723e-10	3R	17890288	how	how-in	intronic	52	0.327044	12	C	A	A
2L	1553917	Or22b	29658	intergenic	35	0.21875	16	T	C	T	-0.58129	39.9713	2.57723e-10	3R	17890288	how	how-in	intronic	52	0.327044	12	C	A	A
3R	27235512	Gprk2	Gprk2-in	intronic	59	0.359756	15	T	G	G	0.50607	39.9612	2.59053e-10	2L	10326962	RnrL	RnrL-PA	missense	71	0.440994	16	C	T	C
2L	10305331	CG5390	CG5390-cds	synonymous	77	0.49359	17	G	C	C	-0.63445	39.9551	2.59874e-10	3L	18169407	W	W-in	intronic	27	0.166667	19	G	A	G
2R	20996148	CG30430	-20807	intergenic	75	0.454545	21	C	T	T	-0.49183	39.9378	2.62183e-10	3R	20475974	ash2	ash2:3	synonymous	70	0.434783	16	G	A	A
2R	20996148	CG16778	9460	intergenic	75	0.454545	21	C	T	T	-0.49183	39.9378	2.62183e-10	3R	20475974	ash2	ash2:3	synonymous	70	0.434783	16	G	A	A
3L	16276301	CG13048	CG13048-PA	missense	72	0.447205	16	A	G	A	-0.49344	39.9285	2.63427e-10	2R	9929211	mam	mam-in	intronic	77	0.478261	17	A	G	A
2R	20996148	CG30430	-20807	intergenic	75	0.454545	21	C	T	T	-0.49064	39.9185	2.64786e-10	3R	20476083	ash2	ash2-in	intronic	70	0.443038	15	A	G	G
2R	20996148	CG16778	9460	intergenic	75	0.454545	21	C	T	T	-0.49064	39.9185	2.64786e-10	3R	20476083	ash2	ash2-in	intronic	70	0.443038	15	A	G	G
X	21392768	CG32822	CG32822-u3	intergenic	56	0.335329	11	C	T	T	-0.53086	39.9141	2.65374e-10	3R	6403430	hth	hth-in	intronic	73	0.464968	18	G	A	G
2R	13806963	PpY-55A	-35937	intergenic	26	0.1625	9	T	A	A	0.70876	39.9038	2.66789e-10	2R	13704241	grh	grh-in	intronic	56	0.352201	14	C	A	A
2R	13806974	PpY-55A	-35926	intergenic	26	0.163522	8	C	A	A	0.70876	39.9038	2.66789e-10	2R	13704241	grh	grh-in	intronic	56	0.352201	14	C	A	A
2R	13806963	CG14491	23880	intergenic	26	0.1625	9	T	A	A	0.70876	39.9038	2.66789e-10	2R	13704241	grh	grh-in	intronic	56	0.352201	14	C	A	A
2R	13806974	CG14491	23891	intergenic	26	0.163522	8	C	A	A	0.70876	39.9038	2.66789e-10	2R	13704241	grh	grh-in	intronic	56	0.352201	14	C	A	A
2R	13806963	elk	elk-in	intronic	26	0.1625	9	T	A	A	0.70876	39.9038	2.66789e-10	2R	13704241	grh	grh-in	intronic	56	0.352201	14	C	A	A
2R	13806974	elk	elk-in	intronic	26	0.163522	8	C	A	A	0.70876	39.9038	2.66789e-10	2R	13704241	grh	grh-in	intronic	56	0.352201	14	C	A	A
3L	2807667	CG9973	-40909	intergenic	51	0.307229	19	G	T	G	-0.52287	39.9001	2.67282e-10	3R	17005903	SNF4Agamma	SNF4Agamma-in	intronic	74	0.474359	15	C	T	T
3L	2807667	CG2083	7537	intergenic	51	0.307229	19	G	T	G	-0.52287	39.9001	2.67282e-10	3R	17005903	SNF4Agamma	SNF4Agamma-in	intronic	74	0.474359	15	C	T	T
3R	26967138	Gycbeta100B	Gycbeta100B-in	intronic	20	0.121951	19	G	A	G	-0.7184	39.885	2.69369e-10	2R	15557795	hrg	469	intergenic	73	0.450617	10	G	C	C
2R	21133956	CG30429	-34	intergenic	62	0.392405	13	T	A	A	0.63288	39.8823	2.69733e-10	3R	13534435	osa	osa-in	intronic	32	0.195122	19	G	A	G
2R	21133956	Kr	16899	intergenic	62	0.392405	13	T	A	A	0.63288	39.8823	2.69733e-10	3R	13534435	osa	osa-in	intronic	32	0.195122	19	G	A	G
3R	24432338	CG9986	CG9986:2	synonymous	48	0.292683	21	C	T	C	0.54642	39.8708	2.71328e-10	3L	2722518	Mrtf	Mrtf-PB	synonymous	59	0.355422	18	T	C	T
3R	11025680	CG42542	CG42542-in	intronic	59	0.36646	8	A	T	T	0.59569	39.8674	2.71803e-10	2R	2008321	EcR	EcR-in	intronic	35	0.213415	20	G	T	G
3R	11025553	CG42542	CG42542-in	intronic	64	0.390244	13	C	A	A	0.56958	39.8639	2.72284e-10	2R	2008321	EcR	EcR-in	intronic	35	0.213415	20	G	T	G
3L	5359476	membrin	-109	intergenic	26	0.159509	15	G	A	G	-0.78954	39.8602	2.72806e-10	X	3038007	N	N-in	intronic	36	0.226415	10	T	C	T
3L	5359476	Uev1A	151	intergenic	26	0.159509	15	G	A	G	-0.78954	39.8602	2.72806e-10	X	3038007	N	N-in	intronic	36	0.226415	10	T	C	T
2L	1945159	CG15357	-66	intergenic	73	0.464968	18	G	A	A	0.51283	39.8531	2.73799e-10	2R	18041273	a	a-in	intronic	57	0.351852	19	T	A	A
2L	1945159	tRNA:G3:22BCa	7000	intergenic	73	0.464968	18	G	A	A	0.51283	39.8531	2.73799e-10	2R	18041273	a	a-in	intronic	57	0.351852	19	T	A	A
3L	11064506	Mocs1	Mocs1-in	intronic	31	0.184524	13	C	T	C	-0.62367	39.8402	2.75618e-10	2L	1056962	S	S-in	intronic	52	0.327044	15	C	G	G
3L	11064506	Mocs1	Mocs1-in	intronic	31	0.184524	13	C	T	C	-0.62687	39.8362	2.76171e-10	2L	1056957	S	S-in	intronic	51	0.320755	15	C	A	A
3R	14624370	CG18208	-7503	intergenic	35	0.224359	7	C	A	C	0.58209	39.8339	2.76507e-10	X	7961229	mys	mys:5	synonymous	82	0.493976	10	G	A	G
3R	14624370	CG7720	3494	intergenic	35	0.224359	7	C	A	C	0.58209	39.8339	2.76507e-10	X	7961229	mys	mys:5	synonymous	82	0.493976	10	G	A	G
3L	4520080	Tie	Tie-in	intronic	25	0.150602	5	A	G	G	0.69607	39.8056	2.80533e-10	3L	13239899	caps	caps-in	intronic	62	0.3875	13	G	C	G
X	16552225	r	r:3	synonymous	68	0.409639	10	C	T	C	0.62735	39.7826	2.83869e-10	2R	18262141	Rtf1	-456	intergenic	36	0.218182	12	A	T	A
3L	581149	Ppm1	-188	intergenic	75	0.457317	9	T	C	T	0.59265	39.7553	2.87855e-10	2L	1654028	chinmo	chinmo-in	intronic	33	0.198795	10	A	G	G
3L	581149	hipk	5084	intergenic	75	0.457317	9	T	C	T	0.59265	39.7553	2.87855e-10	2L	1654028	chinmo	chinmo-in	intronic	33	0.198795	10	A	G	G
3L	8534531	rhea	-3526	intergenic	13	0.083871	8	A	G	A	0.66519	39.7525	2.88274e-10	2R	7095814	shn	shn-cds	synonymous	75	0.465839	15	C	T	C
3L	8534531	ergic53	3413	intergenic	13	0.083871	8	A	G	A	0.66519	39.7525	2.88274e-10	2R	7095814	shn	shn-cds	synonymous	75	0.465839	15	C	T	C
3R	7179421	mRpL40	-54198	intergenic	56	0.347826	16	A	T	A	0.5431	39.7258	2.92246e-10	2L	3939438	fred	fred-in	intronic	56	0.35	17	A	C	A
3R	7179421	KP78a	568	intergenic	56	0.347826	16	A	T	A	0.5431	39.7258	2.92246e-10	2L	3939438	fred	fred-in	intronic	56	0.35	17	A	C	A
3R	7179421	pros	pros-in	intergenic	56	0.347826	16	A	T	A	0.5431	39.7258	2.92246e-10	2L	3939438	fred	fred-in	intronic	56	0.35	17	A	C	A
3R	11025523	CG42542	CG42542-in	intronic	64	0.387879	15	C	G	G	0.56867	39.7168	2.93587e-10	2R	2008321	EcR	EcR-in	intronic	35	0.213415	20	G	T	G
X	21393014	CG32822	CG32822-u3	intergenic	55	0.333333	12	T	C	C	0.49605	39.6993	2.96227e-10	3R	6404811	hth	hth-in	intronic	59	0.364198	13	T	C	T
X	4562038	rap	rap-PB	synonymous	54	0.323353	12	G	T	G	-0.67582	39.6878	2.97977e-10	X	2860065	rst	rst-u5	UTR	30	0.180723	11	C	T	T
3R	9840279	rdx	rdx-in	intronic	72	0.455696	10	C	G	C	-0.50307	39.6421	3.05041e-10	X	13308419	Set2	Set2-cds	missense	60	0.361446	14	G	C	G
2L	3950241	CG34176	-53839	intergenic	76	0.475	15	T	A	A	-0.58617	39.6332	3.06436e-10	3L	1464971	rho	rho-in	intronic	40	0.239521	23	T	A	T
2L	3950241	CG31773	35953	intergenic	76	0.475	15	T	A	A	-0.58617	39.6332	3.06436e-10	3L	1464971	rho	rho-in	intronic	40	0.239521	23	T	A	T
2L	19603053	Lar	-3516	intergenic	58	0.376623	18	G	C	G	0.49948	39.6296	3.06995e-10	3L	14339124	fz	fz-in	intronic	67	0.408537	13	C	A	A
2L	19603053	CG10366	16613	intergenic	58	0.376623	18	G	C	G	0.49948	39.6296	3.06995e-10	3L	14339124	fz	fz-in	intronic	67	0.408537	13	C	A	A
X	21100076	tRNA:CR32518:Psi	-2276	intergenic	65	0.393939	9	A	C	A	0.5718	39.6217	3.08234e-10	3L	14350320	fz	fz-in	intronic	41	0.248485	21	G	A	A
X	21100076	CG32523	10214	intergenic	65	0.393939	9	A	C	A	0.5718	39.6217	3.08234e-10	3L	14350320	fz	fz-in	intronic	41	0.248485	21	G	A	A
X	21100076	CG32521	CG32521-in	intronic	65	0.393939	9	A	C	A	0.5718	39.6217	3.08234e-10	3L	14350320	fz	fz-in	intronic	41	0.248485	21	G	A	A
X	21394514	CG14476	-77113	intergenic	51	0.31875	9	C	T	T	0.50274	39.6099	3.10108e-10	3R	6404811	hth	hth-in	intronic	59	0.364198	13	T	C	T
X	21394514	CG32822	1457	intergenic	51	0.31875	9	C	T	T	0.50274	39.6099	3.10108e-10	3R	6404811	hth	hth-in	intronic	59	0.364198	13	T	C	T
2R	13806982	PpY-55A	-35918	intergenic	27	0.16875	8	A	G	G	0.70949	39.6066	3.10627e-10	2R	13704366	grh	grh-in	intronic	43	0.267081	14	A	G	A
2R	13806982	CG14491	23899	intergenic	27	0.16875	8	A	G	G	0.70949	39.6066	3.10627e-10	2R	13704366	grh	grh-in	intronic	43	0.267081	14	A	G	A
2R	13806982	elk	elk-in	intronic	27	0.16875	8	A	G	G	0.70949	39.6066	3.10627e-10	2R	13704366	grh	grh-in	intronic	43	0.267081	14	A	G	A
3R	15758959	mira	mira-cds	missense	57	0.349693	18	T	C	C	-0.5552	39.6016	3.1143e-10	2R	20239016	bs	bs-in	intronic	39	0.242236	15	A	C	A
3R	15758959	Hs6st	Hs6st-in	missense	57	0.349693	18	T	C	C	-0.5552	39.6016	3.1143e-10	2R	20239016	bs	bs-in	intronic	39	0.242236	15	A	C	A
X	12259074	CG2577	-8170	intergenic	36	0.214286	10	T	G	T	-0.68838	39.585	3.14085e-10	2L	668149	ds	ds-in	intronic	44	0.275	16	A	G	A
X	12259074	CG2577	-8170	intergenic	36	0.214286	10	T	G	T	-0.68838	39.585	3.14085e-10	2L	668149	ds	ds-in	intronic	44	0.275	16	A	G	A
X	12259074	CG32655	129312	intergenic	36	0.214286	10	T	G	T	-0.68838	39.585	3.14085e-10	2L	668149	ds	ds-in	intronic	44	0.275	16	A	G	A
X	12259074	CG32655	129312	intergenic	36	0.214286	10	T	G	T	-0.68838	39.585	3.14085e-10	2L	668149	ds	ds-in	intronic	44	0.275	16	A	G	A
X	21392620	CG32822	CG32822-u3	intergenic	52	0.317073	11	A	T	T	0.50971	39.5845	3.14169e-10	3R	6404811	hth	hth-in	intronic	59	0.364198	13	T	C	T
3L	8903353	mfr	mfr-u5	synonymous	49	0.295181	17	T	C	C	0.54769	39.5833	3.14359e-10	2R	11714682	Poxn	Poxn-PA	synonymous	55	0.339506	14	T	G	G
2L	12441788	Oatp33Ea	Oatp33Ea-u3	UTR	28	0.179487	14	A	T	T	-0.62273	39.5614	3.17908e-10	2L	435001	ex	ex-in	intronic	69	0.43949	18	T	G	T
2R	13806969	PpY-55A	-35931	intergenic	26	0.163522	9	A	T	T	0.70855	39.545	3.20581e-10	2R	13704241	grh	grh-in	intronic	56	0.352201	14	C	A	A
2R	13806969	CG14491	23886	intergenic	26	0.163522	9	A	T	T	0.70855	39.545	3.20581e-10	2R	13704241	grh	grh-in	intronic	56	0.352201	14	C	A	A
2R	13806969	elk	elk-in	intronic	26	0.163522	9	A	T	T	0.70855	39.545	3.20581e-10	2R	13704241	grh	grh-in	intronic	56	0.352201	14	C	A	A
2R	17550619	CG42362	-1319	intergenic	31	0.185629	17	T	A	T	0.56618	39.5118	3.26085e-10	3R	25285344	Ptp99A	Ptp99A-in	intronic	77	0.475309	11	A	C	C
2R	17550619	pirk	870	intergenic	31	0.185629	17	T	A	T	0.56618	39.5118	3.26085e-10	3R	25285344	Ptp99A	Ptp99A-in	intronic	77	0.475309	11	A	C	C
3R	12664998	iab-4	-10728	intergenic	51	0.324841	13	C	G	G	-0.52547	39.5088	3.26591e-10	3R	15127491	Dl	-962	intergenic	65	0.401235	11	A	C	C
3R	12664998	abd-A	9229	intergenic	51	0.324841	13	C	G	G	-0.52547	39.5088	3.26591e-10	3R	15127491	Dl	-962	intergenic	65	0.401235	11	A	C	C
X	6207709	CG15894	-2422	intergenic	19	0.113772	10	A	C	A	0.72262	39.5058	3.27085e-10	X	4320377	bi	bi-in	intronic	18	0.136364	7	T	C	T
X	6207709	CG3823	6931	intergenic	19	0.113772	10	A	C	A	0.72262	39.5058	3.27085e-10	X	4320377	bi	bi-in	intronic	18	0.136364	7	T	C	T
3R	12561916	bxd	-5931	intergenic	60	0.384615	15	T	C	C	-0.49162	39.4932	3.29207e-10	3L	8876191	dally	dally-in	intronic	73	0.439759	13	T	A	T
3R	12561916	Ubx	1568	intergenic	60	0.384615	15	T	C	C	-0.49162	39.4932	3.29207e-10	3L	8876191	dally	dally-in	intronic	73	0.439759	13	T	A	T
2R	17550538	CG42362	-1400	intergenic	32	0.191617	16	A	C	A	0.56537	39.4903	3.29687e-10	3R	25285330	Ptp99A	Ptp99A-in	intronic	77	0.472393	12	T	C	C
2R	17550540	CG42362	-1398	intergenic	32	0.191617	17	T	G	T	0.56537	39.4903	3.29687e-10	3R	25285330	Ptp99A	Ptp99A-in	intronic	77	0.472393	12	T	C	C
2R	17550538	pirk	789	intergenic	32	0.191617	16	A	C	A	0.56537	39.4903	3.29687e-10	3R	25285330	Ptp99A	Ptp99A-in	intronic	77	0.472393	12	T	C	C
2R	17550540	pirk	791	intergenic	32	0.191617	17	T	G	T	0.56537	39.4903	3.29687e-10	3R	25285330	Ptp99A	Ptp99A-in	intronic	77	0.472393	12	T	C	C
3L	1533650	CG12091	-1279	intergenic	63	0.379518	15	T	G	T	0.47472	39.4844	3.30685e-10	2R	9807757	shot	shot-in	intronic	5	0.0396825	3	G	A	G
3L	1533650	Ir62a	2391	intergenic	63	0.379518	15	T	G	T	0.47472	39.4844	3.30685e-10	2R	9807757	shot	shot-in	intronic	5	0.0396825	3	G	A	G
3L	1533650	CG12090	CG12090:2	missense	63	0.379518	15	T	G	T	0.47472	39.4844	3.30685e-10	2R	9807757	shot	shot-in	intronic	5	0.0396825	3	G	A	G
3R	15836356	MED25	MED25-PA	synonymous	61	0.374233	21	C	A	A	0.55521	39.484	3.30764e-10	2R	13699638	grh	grh-in	intronic	39	0.233533	15	C	T	T
X	17927368	CG15373	-10736	intergenic	34	0.228188	5	A	C	A	0.85985	39.473	3.32622e-10	3R	7473277	Csk	Csk-in	intronic	27	0.171975	11	A	G	A
X	17927368	CG15373	-10736	intergenic	34	0.228188	5	A	C	A	0.85985	39.473	3.32622e-10	3R	7473277	Csk	Csk-in	intronic	27	0.171975	11	A	G	A
X	17927368	CG6867	5074	intergenic	34	0.228188	5	A	C	A	0.85985	39.473	3.32622e-10	3R	7473277	Csk	Csk-in	intronic	27	0.171975	11	A	G	A
X	17927368	CG6867	5074	intergenic	34	0.228188	5	A	C	A	0.85985	39.473	3.32622e-10	3R	7473277	Csk	Csk-in	intronic	27	0.171975	11	A	G	A
X	17927368	Sh	Sh-in	intronic	34	0.228188	5	A	C	A	0.85985	39.473	3.32622e-10	3R	7473277	Csk	Csk-in	intronic	27	0.171975	11	A	G	A
X	17927368	Sh	Sh-in	intronic	34	0.228188	5	A	C	A	0.85985	39.473	3.32622e-10	3R	7473277	Csk	Csk-in	intronic	27	0.171975	11	A	G	A
3L	11673667	TfIIEalpha	-1459	intergenic	56	0.341463	16	T	G	G	0.5041	39.442	3.3795e-10	3L	9631874	fry	fry-in	synonymous	77	0.466667	14	T	C	T
3L	11673667	mir-274	23550	intergenic	56	0.341463	16	T	G	G	0.5041	39.442	3.3795e-10	3L	9631874	fry	fry-in	synonymous	77	0.466667	14	T	C	T
3L	18119816	Cyp312a1	-3384	intergenic	43	0.281046	8	T	C	T	0.57163	39.426	3.40723e-10	3R	25245281	Ptp99A	Ptp99A-in	intronic	55	0.339506	16	T	A	T
3L	18119817	Cyp312a1	-3383	intergenic	46	0.294872	9	C	T	C	0.57163	39.426	3.40723e-10	3R	25245281	Ptp99A	Ptp99A-in	intronic	55	0.339506	16	T	A	T
3L	18119816	CG42853	4727	intergenic	43	0.281046	8	T	C	T	0.57163	39.426	3.40723e-10	3R	25245281	Ptp99A	Ptp99A-in	intronic	55	0.339506	16	T	A	T
3L	18119817	CG42853	4728	intergenic	46	0.294872	9	C	T	C	0.57163	39.426	3.40723e-10	3R	25245281	Ptp99A	Ptp99A-in	intronic	55	0.339506	16	T	A	T
3L	11050733	CG7888	CG7888-cds	synonymous	51	0.312883	9	G	A	G	-0.52827	39.4194	3.41878e-10	X	2403068	trol	trol-in	intronic	51	0.309091	10	C	T	C
3L	17275352	mir-219	-32754	intergenic	71	0.438272	11	A	G	G	0.71432	39.4141	3.42818e-10	2R	6406490	lola	lola-u3	UTR	17	0.101796	15	G	C	G
3L	17275352	mir-219	-32754	intergenic	71	0.438272	11	A	G	G	0.71432	39.4141	3.42818e-10	2R	6406490	lola	lola-u3	UTR	17	0.101796	15	G	C	G
3L	17275352	CG13723	17266	intergenic	71	0.438272	11	A	G	G	0.71432	39.4141	3.42818e-10	2R	6406490	lola	lola-u3	UTR	17	0.101796	15	G	C	G
3L	17275352	CG13723	17266	intergenic	71	0.438272	11	A	G	G	0.71432	39.4141	3.42818e-10	2R	6406490	lola	lola-u3	UTR	17	0.101796	15	G	C	G
3R	10795319	CG14861	-45173	intergenic	58	0.367089	9	C	T	C	0.5433	39.4092	3.43667e-10	2R	7365772	inv	inv-in	intronic	68	0.414634	17	C	T	C
3R	10795319	CG3837	47292	intergenic	58	0.367089	9	C	T	C	0.5433	39.4092	3.43667e-10	2R	7365772	inv	inv-in	intronic	68	0.414634	17	C	T	C
3L	16311669	Nplp3	Nplp3-u3	UTR	51	0.31677	18	T	C	T	-0.52439	39.4046	3.44489e-10	3R	21814116	Nf1	Nf1:10	synonymous	78	0.484472	19	G	A	A
3R	11024529	CG42542	CG42542-in	intronic	55	0.335366	22	A	C	C	0.58735	39.4	3.45294e-10	2R	2008321	EcR	EcR-in	intronic	35	0.213415	20	G	T	G
2R	7619457	CG13193	-36501	intergenic	76	0.463415	12	T	C	C	-0.51327	39.3762	3.49523e-10	3R	23011102	Ser	Ser-in	intronic	70	0.434783	20	G	A	G
2R	7619457	pyr	5607	intergenic	76	0.463415	12	T	C	C	-0.51327	39.3762	3.49523e-10	3R	23011102	Ser	Ser-in	intronic	70	0.434783	20	G	A	G
2L	17251383	CG15140	-34911	intergenic	29	0.188312	14	T	C	T	-0.62169	39.3708	3.50499e-10	X	7204570	brk	brk-PA	synonymous	72	0.433735	13	T	C	C
2L	17251383	CG15139	11833	intergenic	29	0.188312	14	T	C	T	-0.62169	39.3708	3.50499e-10	X	7204570	brk	brk-PA	synonymous	72	0.433735	13	T	C	C
2L	17251383	beat-IIIc	beat-IIIc-in	intronic	29	0.188312	14	T	C	T	-0.62169	39.3708	3.50499e-10	X	7204570	brk	brk-PA	synonymous	72	0.433735	13	T	C	C
X	13510505	Tango2	-520	intergenic	56	0.337349	11	C	A	A	0.60273	39.361	3.52259e-10	3L	4157909	nab	nab-in	intronic	45	0.27439	10	C	T	T
X	13510505	tth	118	intergenic	56	0.337349	11	C	A	A	0.60273	39.361	3.52259e-10	3L	4157909	nab	nab-in	intronic	45	0.27439	10	C	T	T
X	21392559	CG32822	CG32822-u3	intergenic	56	0.341463	9	T	A	A	-0.52869	39.3445	3.5526e-10	3R	6403430	hth	hth-in	intronic	73	0.464968	18	G	A	G
3L	10628050	E(z)		synonymous	42	0.253012	17	G	T	G	0.58487	39.3411	3.55869e-10	2R	18166134	dve	dve-in	intronic	71	0.446541	17	C	A	C
3L	4613233	Src64B	Src64B-in	intronic	26	0.164557	10	G	T	G	0.60398	39.3375	3.56521e-10	X	3030217	N	N-in	intronic	56	0.341463	14	C	A	A
3L	9132323	nwk	nwk:3	missense	25	0.149701	15	G	T	G	-0.63196	39.3336	3.57239e-10	3R	3979301	grn	grn-in	intronic	65	0.401235	15	G	T	G
3L	7816733	Pdp1	Pdp1-in	intronic	15	0.0920245	9	T	A	T	0.72644	39.3295	3.57986e-10	2L	379873	al	al-in	intronic	81	0.5	16	T	G	T
3R	10055053	CG9616	-15473	intergenic	43	0.265432	10	T	A	T	0.56027	39.3215	3.59468e-10	X	18446608	Bx	Bx-in	intronic	53	0.321212	12	G	T	G
3R	10055053	CG9624	171	intergenic	43	0.265432	10	T	A	T	0.56027	39.3215	3.59468e-10	X	18446608	Bx	Bx-in	intronic	53	0.321212	12	G	T	G
3R	4899801	pum	pum-in	intronic	52	0.333333	20	C	T	T	-0.56653	39.3083	3.61901e-10	2L	1674577	chinmo	chinmo-in	intronic	50	0.314465	11	T	A	A
2L	1144314	CG4726	CG4726-in	intronic	49	0.308176	9	C	T	C	0.72708	39.2785	3.67466e-10	3R	12890097	Dad	Dad-in	intronic	27	0.162651	13	T	A	T
3L	8547262	rhea	rhea-in	intergenic	79	0.475904	19	A	T	T	-0.68605	39.2701	3.69047e-10	3R	26137709	hdc	hdc-in	intronic	21	0.12963	14	G	A	A
2L	5425043	CG31647	-10539	intergenic	65	0.40625	14	T	C	T	-0.50573	39.2632	3.70362e-10	2R	9369374	arr	arr-cds	missense	62	0.3875	22	T	C	T
2L	5425043	H15	9115	intergenic	65	0.40625	14	T	C	T	-0.50573	39.2632	3.70362e-10	2R	9369374	arr	arr-cds	missense	62	0.3875	22	T	C	T
X	13869905	ben	-20482	intergenic	79	0.49375	8	C	G	C	-0.60276	39.2588	3.71189e-10	3L	18169407	W	W-in	intronic	27	0.166667	19	G	A	G
X	13869905	CG11068	19298	intergenic	79	0.49375	8	C	G	C	-0.60276	39.2588	3.71189e-10	3L	18169407	W	W-in	intronic	27	0.166667	19	G	A	G
3R	4545769	CG8116	CG8116-u3	UTR	67	0.416149	16	G	A	G	0.67327	39.2218	3.78294e-10	3L	10984845	klu	klu-in	intronic	31	0.186747	12	G	C	G
3R	4545769	CG11760	CG11760-u3	UTR	67	0.416149	16	G	A	G	0.67327	39.2218	3.78294e-10	3L	10984845	klu	klu-in	intronic	31	0.186747	12	G	C	G
3L	12456219	eyg	eyg-u3	UTR	31	0.189024	17	A	T	A	-0.59264	39.2205	3.78545e-10	3L	4157323	nab	nab-in	intronic	76	0.460606	13	T	A	T
2L	6130171	CG42730	CG42730:2	synonymous	71	0.452229	10	G	T	T	-0.50089	39.2131	3.79978e-10	3L	15971285	brm	brm-in	synonymous	54	0.333333	14	C	T	T
2L	6130171	tectonic	tectonic-u5	synonymous	71	0.452229	10	G	T	T	-0.50089	39.2131	3.79978e-10	3L	15971285	brm	brm-in	synonymous	54	0.333333	14	C	T	T
3L	4519979	Tie	Tie-in	intronic	27	0.161677	10	C	T	T	0.63979	39.2081	3.80963e-10	3L	13239899	caps	caps-in	intronic	62	0.3875	13	G	C	G
2L	397341	CG4213	CG4213-PA	missense	28	0.168675	16	C	T	C	-0.73346	39.1926	3.83994e-10	2R	6598550	stan	stan:5	synonymous	66	0.407407	26	G	A	G
3L	9842646	Gap1	Gap1-in	intronic	59	0.353293	16	T	G	T	0.47935	39.175	3.8748e-10	3L	10985542	klu	klu-in	intronic	80	0.496894	13	A	G	G
3L	18205256	CheA75a	-39932	intergenic	78	0.490566	13	A	T	T	-0.6091	39.1506	3.92348e-10	3L	13392318	sens	sens-in	intronic	31	0.187879	20	T	C	T
3L	18205256	CG7320	8590	intergenic	78	0.490566	13	A	T	T	-0.6091	39.1506	3.92348e-10	3L	13392318	sens	sens-in	intronic	31	0.187879	20	T	C	T
2R	11736568	tun	tun-u5	UTR	45	0.271084	17	A	T	A	0.73853	39.0884	4.05037e-10	3L	16468542	argos	argos-in	intronic	18	0.108434	19	A	T	A
2R	11736568	tun	tun-u5	UTR	45	0.271084	17	A	T	A	0.73853	39.0884	4.05037e-10	3L	16468542	argos	argos-in	intronic	18	0.108434	19	A	T	A
X	8390442	CG33181	CG33181-in	intronic	64	0.392638	9	G	A	A	-0.48597	39.0856	4.05627e-10	3L	1300635	Rac1	-244	intergenic	56	0.333333	19	A	G	A
3L	4613079	Src64B	Src64B-u5	intronic	15	0.0898204	11	C	T	C	0.78436	39.0487	4.13376e-10	3L	7997746	nmo	nmo-in	RNA	50	0.301205	8	C	T	T
3L	10654171	CG8003	-408	intergenic	31	0.208054	11	T	C	T	-0.61785	39.0261	4.18169e-10	3R	26187167	hdc	hdc-u3	missense	44	0.289474	8	A	T	A
3L	10654171	CG14153	16456	intergenic	31	0.208054	11	T	C	T	-0.61785	39.0261	4.18169e-10	3R	26187167	hdc	hdc-u3	missense	44	0.289474	8	A	T	A
2R	8552612	nemy	nemy-u5	UTR	56	0.35	15	G	A	A	0.54597	39.0143	4.20704e-10	3L	13255375	caps	caps-in	intronic	67	0.411043	16	C	T	T
3L	12061070	Sema-5c	Sema-5c-u3	UTR	80	0.496894	17	G	T	T	0.60964	38.996	4.2467e-10	3L	14070581	btl	btl-in	intronic	33	0.20625	11	C	G	C
3L	7816733	Pdp1	Pdp1-in	intronic	15	0.0920245	9	T	A	T	0.71287	38.9938	4.25153e-10	3L	12217459	app	app-in	intronic	66	0.428571	8	C	T	T
X	12259074	CG2577	-8170	intergenic	36	0.214286	10	T	G	T	-0.68639	38.992	4.25541e-10	2L	668124	ds	ds-in	intronic	43	0.27044	16	A	T	A
X	12259074	CG2577	-8170	intergenic	36	0.214286	10	T	G	T	-0.68639	38.992	4.25541e-10	2L	668124	ds	ds-in	intronic	43	0.27044	16	A	T	A
X	12259074	CG32655	129312	intergenic	36	0.214286	10	T	G	T	-0.68639	38.992	4.25541e-10	2L	668124	ds	ds-in	intronic	43	0.27044	16	A	T	A
X	12259074	CG32655	129312	intergenic	36	0.214286	10	T	G	T	-0.68639	38.992	4.25541e-10	2L	668124	ds	ds-in	intronic	43	0.27044	16	A	T	A
3R	9499398	CG9588	-1416	intergenic	64	0.42953	17	G	A	A	0.62803	38.9881	4.264e-10	3R	6196034	Rfx	Rfx-in	intronic	29	0.180124	19	G	C	G
3R	9499398	Task6	1575	intergenic	64	0.42953	17	G	A	A	0.62803	38.9881	4.264e-10	3R	6196034	Rfx	Rfx-in	intronic	29	0.180124	19	G	C	G
X	12259074	CG2577	-8170	intergenic	36	0.214286	10	T	G	T	-0.68122	38.979	4.28392e-10	2L	668154	ds	ds-in	intronic	44	0.275	16	C	T	C
X	12259074	CG2577	-8170	intergenic	36	0.214286	10	T	G	T	-0.68122	38.979	4.28392e-10	2L	668142	ds	ds-in	intronic	44	0.275	16	T	A	T
X	12259074	CG2577	-8170	intergenic	36	0.214286	10	T	G	T	-0.68122	38.979	4.28392e-10	2L	668154	ds	ds-in	intronic	44	0.275	16	C	T	C
X	12259074	CG2577	-8170	intergenic	36	0.214286	10	T	G	T	-0.68122	38.979	4.28392e-10	2L	668142	ds	ds-in	intronic	44	0.275	16	T	A	T
X	12259074	CG32655	129312	intergenic	36	0.214286	10	T	G	T	-0.68122	38.979	4.28392e-10	2L	668154	ds	ds-in	intronic	44	0.275	16	C	T	C
X	12259074	CG32655	129312	intergenic	36	0.214286	10	T	G	T	-0.68122	38.979	4.28392e-10	2L	668142	ds	ds-in	intronic	44	0.275	16	T	A	T
X	12259074	CG32655	129312	intergenic	36	0.214286	10	T	G	T	-0.68122	38.979	4.28392e-10	2L	668154	ds	ds-in	intronic	44	0.275	16	C	T	C
X	12259074	CG32655	129312	intergenic	36	0.214286	10	T	G	T	-0.68122	38.979	4.28392e-10	2L	668142	ds	ds-in	intronic	44	0.275	16	T	A	T
2R	4337816	LvpH	LvpH-in	intronic	76	0.490323	16	A	G	G	0.57621	38.974	4.29476e-10	3R	15148144	Dl	Dl-in	intronic	43	0.265432	11	C	T	T
2L	14603155	osp	osp:7	synonymous	67	0.429487	15	C	G	C	-0.65421	38.9609	4.32384e-10	3L	7996714	nmo	nmo-in	RNA	37	0.22561	16	C	T	C
2L	8133334	CG8668	CG8668-cds	synonymous	33	0.207547	18	T	C	T	0.69021	38.9592	4.32747e-10	3R	6451756	hth	hth-in	intronic	33	0.207547	12	G	A	A
3R	17323400	C15	-2577	intergenic	70	0.4375	14	C	A	A	0.53276	38.9569	4.33269e-10	X	3062337	N	N:6	synonymous	45	0.271084	11	G	A	G
3R	17323400	CG7922	10393	intergenic	70	0.4375	14	C	A	A	0.53276	38.9569	4.33269e-10	X	3062337	N	N:6	synonymous	45	0.271084	11	G	A	G
2R	15290981	hts	hts-in	synonymous	72	0.436364	20	A	G	A	0.51262	38.9395	4.37144e-10	3L	8012273	nmo	nmo-in	intronic	62	0.378049	10	G	A	A
2R	15290981	CG34197	CG34197-PA	synonymous	72	0.436364	20	A	G	A	0.51262	38.9395	4.37144e-10	3L	8012273	nmo	nmo-in	intronic	62	0.378049	10	G	A	A
2R	13806981	PpY-55A	-35919	intergenic	26	0.164557	8	T	A	A	0.70677	38.903	4.45398e-10	2R	13704366	grh	grh-in	intronic	43	0.267081	14	A	G	A
2R	13806981	CG14491	23898	intergenic	26	0.164557	8	T	A	A	0.70677	38.903	4.45398e-10	2R	13704366	grh	grh-in	intronic	43	0.267081	14	A	G	A
2R	13806981	elk	elk-in	intronic	26	0.164557	8	T	A	A	0.70677	38.903	4.45398e-10	2R	13704366	grh	grh-in	intronic	43	0.267081	14	A	G	A
2R	18284324	CG3624	CG3624-in	intronic	38	0.228916	11	C	T	C	-0.81276	38.8873	4.49e-10	2R	18030064	a	a-in	intronic	19	0.116564	20	T	G	G
3L	4216368	Cpr64Ad	Cpr64Ad-u3	UTR	78	0.478528	11	A	G	G	0.49563	38.8783	4.51077e-10	3R	2181610	Pak	Pak-in	intronic	51	0.320755	8	A	G	G
3L	7816733	Pdp1	Pdp1-in	intronic	15	0.0920245	9	T	A	T	-0.75616	38.8569	4.56029e-10	3R	14062506	repo	repo-cds	synonymous	48	0.305732	13	C	T	C
3L	15737823	CG6244	-63695	intergenic	29	0.18125	12	G	A	G	-0.83465	38.8375	4.60598e-10	3L	12611898	caup	caup-in	intronic	25	0.150602	12	G	C	G
3L	15737823	comm	16169	intergenic	29	0.18125	12	G	A	G	-0.83465	38.8375	4.60598e-10	3L	12611898	caup	caup-in	intronic	25	0.150602	12	G	C	G
X	16934242	CG43077	-27095	intergenic	43	0.259036	12	C	A	A	-0.50739	38.8363	4.60883e-10	3L	8004453	nmo	nmo-in	intronic	73	0.447853	13	T	A	T
X	16934242	CG34326	7674	intergenic	43	0.259036	12	C	A	A	-0.50739	38.8363	4.60883e-10	3L	8004453	nmo	nmo-in	intronic	73	0.447853	13	T	A	T
2L	1144314	CG4726	CG4726-in	intronic	49	0.308176	9	C	T	C	0.70184	38.826	4.63311e-10	3R	12889343	Dad	Dad-in	intronic	27	0.162651	12	A	T	A
3L	4755656	CG13711	-2373	intergenic	45	0.272727	19	C	T	C	0.76033	38.8022	4.68996e-10	3L	12730661	Ptp69D	Ptp69D:3	synonymous	23	0.137725	20	T	C	T
3L	4755656	CG12493	1938	intergenic	45	0.272727	19	C	T	C	0.76033	38.8022	4.68996e-10	3L	12730661	Ptp69D	Ptp69D:3	synonymous	23	0.137725	20	T	C	T
3L	4755656	Gef64C	Gef64C-in	intronic	45	0.272727	19	C	T	C	0.76033	38.8022	4.68996e-10	3L	12730661	Ptp69D	Ptp69D:3	synonymous	23	0.137725	20	T	C	T
3R	11024541	CG42542	CG42542-in	intronic	55	0.335366	20	C	A	A	0.58668	38.7988	4.69821e-10	2R	2008321	EcR	EcR-in	intronic	35	0.213415	20	G	T	G
2R	17550538	CG42362	-1400	intergenic	32	0.191617	16	A	C	A	0.55566	38.796	4.70486e-10	3R	25285344	Ptp99A	Ptp99A-in	intronic	77	0.475309	11	A	C	C
2R	17550540	CG42362	-1398	intergenic	32	0.191617	17	T	G	T	0.55566	38.796	4.70486e-10	3R	25285344	Ptp99A	Ptp99A-in	intronic	77	0.475309	11	A	C	C
2R	17550538	pirk	789	intergenic	32	0.191617	16	A	C	A	0.55566	38.796	4.70486e-10	3R	25285344	Ptp99A	Ptp99A-in	intronic	77	0.475309	11	A	C	C
2R	17550540	pirk	791	intergenic	32	0.191617	17	T	G	T	0.55566	38.796	4.70486e-10	3R	25285344	Ptp99A	Ptp99A-in	intronic	77	0.475309	11	A	C	C
3R	11550795	CG34274	-6673	intergenic	47	0.29375	11	A	T	A	-0.63408	38.7895	4.72049e-10	3L	8018022	nmo	nmo-in	intronic	44	0.280255	7	T	A	A
3R	11550795	CG31294	8488	intergenic	47	0.29375	11	A	T	A	-0.63408	38.7895	4.72049e-10	3L	8018022	nmo	nmo-in	intronic	44	0.280255	7	T	A	A
X	21391192	CG32822	-10	intergenic	51	0.305389	10	T	A	A	0.49268	38.7867	4.72747e-10	3R	6404811	hth	hth-in	intronic	59	0.364198	13	T	C	T
X	21391192	Cyp6t1	996	intergenic	51	0.305389	10	T	A	A	0.49268	38.7867	4.72747e-10	3R	6404811	hth	hth-in	intronic	59	0.364198	13	T	C	T
X	14294598	CG9411	-71838	intergenic	28	0.186667	13	T	C	T	-0.78694	38.7838	4.73432e-10	3R	25271821	Ptp99A	Ptp99A-in	intronic	1	0.00769231	6	C	A	C
X	14294598	betaNACtes4	19149	intergenic	28	0.186667	13	T	C	T	-0.78694	38.7838	4.73432e-10	3R	25271821	Ptp99A	Ptp99A-in	intronic	1	0.00769231	6	C	A	C
X	14294598	dpr8	dpr8-in	intronic	28	0.186667	13	T	C	T	-0.78694	38.7838	4.73432e-10	3R	25271821	Ptp99A	Ptp99A-in	intronic	1	0.00769231	6	C	A	C
X	16821224	CG4928	CG4928-in	intronic	53	0.321212	13	C	T	C	-0.61327	38.7796	4.74466e-10	2R	9787403	shot	shot-in	intronic	36	0.222222	12	G	C	G
3L	9139648	Rdl	-4047	intergenic	61	0.363095	10	T	G	T	-0.48489	38.7592	4.79455e-10	2R	18036861	a	a-in	intronic	74	0.459627	12	A	G	G
3L	9139648	CG4641	839	intergenic	61	0.363095	10	T	G	T	-0.48489	38.7592	4.79455e-10	2R	18036861	a	a-in	intronic	74	0.459627	12	A	G	G
X	16910190	CG12433	-6147	intergenic	32	0.205128	7	C	T	C	-0.59106	38.7565	4.80096e-10	2L	5244381	tkv	tkv-in	intronic	61	0.383648	20	C	T	C
X	16910190	CG9059	1087	intergenic	32	0.205128	7	C	T	C	-0.59106	38.7565	4.80096e-10	2L	5244381	tkv	tkv-in	intronic	61	0.383648	20	C	T	C
X	13190366	CG1764	CG1764-in	intronic	52	0.313253	10	C	A	C	-0.5378	38.7502	4.81667e-10	2R	18035591	a	a-in	intronic	54	0.335404	20	C	T	T
X	7759059	Ir7b	Ir7b-cds	synonymous	44	0.263473	10	G	A	G	0.58208	38.7453	4.82881e-10	2R	12467911	Cdk4	Cdk4-u5	UTR	47	0.286585	17	A	G	G
X	7759059	Ir7b	Ir7b-cds	synonymous	44	0.263473	10	G	A	G	0.58208	38.7453	4.82881e-10	2R	12467911	Cdk4	Cdk4-u5	UTR	47	0.286585	17	A	G	G
3R	14325096	fru	fru-in	intronic	32	0.193939	10	C	G	C	-0.61568	38.7349	4.8544e-10	3R	26137810	hdc	hdc-in	intronic	65	0.411392	14	G	C	G
3R	23954216	CG34354	-18330	intergenic	45	0.283019	15	C	T	C	-0.56593	38.7346	4.85517e-10	2R	18265113	Rtf1	Rtf1-in	intronic	77	0.475309	23	T	A	A
3R	23954216	CG34362	42732	intergenic	45	0.283019	15	C	T	C	-0.56593	38.7346	4.85517e-10	2R	18265113	Rtf1	Rtf1-in	intronic	77	0.475309	23	T	A	A
2L	20142967	CG40341	-105256	intergenic	22	0.1375	18	G	C	G	-0.81935	38.733	4.85923e-10	3R	20129649	crb	crb-in	intronic	48	0.3	14	C	A	C
2L	20142967	CG10651	8044	intergenic	22	0.1375	18	G	C	G	-0.81935	38.733	4.85923e-10	3R	20129649	crb	crb-in	intronic	48	0.3	14	C	A	C
2L	20586386	CG31677	-17203	intergenic	74	0.477419	17	A	T	T	-0.61571	38.7198	4.89225e-10	3R	6451756	hth	hth-in	intronic	33	0.207547	12	G	A	A
2L	20586386	CG34007	90938	intergenic	74	0.477419	17	A	T	T	-0.61571	38.7198	4.89225e-10	3R	6451756	hth	hth-in	intronic	33	0.207547	12	G	A	A
3R	14325097	fru	fru-in	intronic	32	0.193939	10	A	G	A	-0.61752	38.7053	4.92871e-10	3R	26137810	hdc	hdc-in	intronic	65	0.411392	14	G	C	G
X	5931551	CG5941	-358	intergenic	80	0.484848	13	G	A	A	-0.4761	38.6994	4.94372e-10	2L	4373516	Traf4	Traf4-in	intronic	77	0.49359	18	C	T	C
X	5931551	rux	330	intergenic	80	0.484848	13	G	A	A	-0.4761	38.6994	4.94372e-10	2L	4373516	Traf4	Traf4-in	intronic	77	0.49359	18	C	T	C
2L	2308051	CG16995	CG16995-in	intronic	46	0.294872	14	G	A	G	0.5237	38.6915	4.96367e-10	3L	16022093	Notum	Notum-in	intronic	65	0.396341	13	G	A	G
2R	18582868	robo	robo-in	intronic	31	0.19375	18	A	G	A	0.58744	38.6854	4.97912e-10	2L	12508730	bun	bun-in	intronic	68	0.433121	13	A	G	A
2R	18582868	robo	robo-in	intronic	31	0.19375	18	A	G	A	0.58744	38.6854	4.97912e-10	2L	12508730	bun	bun-in	intronic	68	0.433121	13	A	G	A
3R	26967138	Gycbeta100B	Gycbeta100B-in	intronic	20	0.121951	19	G	A	G	-0.71755	38.6837	4.98349e-10	2R	15557671	hrg	345	intergenic	73	0.447853	15	A	C	C
X	4302725	bi	-4164	intergenic	53	0.321212	14	C	A	A	0.67763	38.6636	5.03511e-10	2R	11714035	Poxn	-163	intergenic	15	0.0903614	12	A	T	A
X	4302725	CG32773	20441	intergenic	53	0.321212	14	C	A	A	0.67763	38.6636	5.03511e-10	2R	11714035	Poxn	-163	intergenic	15	0.0903614	12	A	T	A
2R	20996148	CG30430	-20807	intergenic	75	0.454545	21	C	T	T	-0.47888	38.6519	5.06528e-10	3R	20476833	ash2	ash2-in	intronic	71	0.440994	21	G	C	C
2R	20996148	CG16778	9460	intergenic	75	0.454545	21	C	T	T	-0.47888	38.6519	5.06528e-10	3R	20476833	ash2	ash2-in	intronic	71	0.440994	21	G	C	C
2L	20586386	CG31677	-17203	intergenic	74	0.477419	17	A	T	T	-0.60681	38.6388	5.09937e-10	3R	6451792	hth	hth-in	intronic	33	0.208861	13	T	G	G
2L	20586386	CG34007	90938	intergenic	74	0.477419	17	A	T	T	-0.60681	38.6388	5.09937e-10	3R	6451792	hth	hth-in	intronic	33	0.208861	13	T	G	G
3L	18863087	CG6852	CG6852-u3	UTR	47	0.291925	12	C	G	C	0.55473	38.6276	5.12886e-10	X	15716286	sd	sd-in	intronic	62	0.371257	14	C	T	C
3L	7631240	CG33275	CG33275-in	intronic	80	0.481928	19	C	T	C	-0.57519	38.6173	5.156e-10	3L	14070576	btl	btl-in	intronic	34	0.21118	12	G	A	G
3R	26054448	CG9737	-12537	intergenic	67	0.416149	9	C	A	C	-0.73174	38.6121	5.16984e-10	X	2436373	trol	trol-in	intronic	20	0.11976	12	G	C	G
3R	26054448	CecC	11789	intergenic	67	0.416149	9	C	A	C	-0.73174	38.6121	5.16984e-10	X	2436373	trol	trol-in	intronic	20	0.11976	12	G	C	G
3L	10917892	CG34050	-19664	intergenic	21	0.127273	11	G	C	G	-0.64765	38.6085	5.17925e-10	2L	4052701	ed	ed-in	intronic	69	0.436709	12	C	G	C
3L	10917892	CG34050	-19664	intergenic	21	0.127273	11	G	C	G	-0.64765	38.6085	5.17925e-10	2L	4052701	ed	ed-in	intronic	69	0.436709	12	C	G	C
3L	10917892	Aps	25668	intergenic	21	0.127273	11	G	C	G	-0.64765	38.6085	5.17925e-10	2L	4052701	ed	ed-in	intronic	69	0.436709	12	C	G	C
3L	10917892	Aps	25668	intergenic	21	0.127273	11	G	C	G	-0.64765	38.6085	5.17925e-10	2L	4052701	ed	ed-in	intronic	69	0.436709	12	C	G	C
2R	19983504	gek	gek:4	missense	73	0.447853	21	C	T	T	0.64143	38.6078	5.18107e-10	2R	7076441	shn	shn-in	intronic	25	0.153374	12	A	G	A
2L	12705040	spict	spict-cds	synonymous	52	0.325	13	T	C	C	-0.55569	38.5931	5.22042e-10	X	13308207	Set2	Set2-cds	synonymous	61	0.36747	11	C	T	C
X	13308207	Set2	Set2-cds	synonymous	61	0.36747	11	C	T	C	-0.55569	38.5931	5.22042e-10	2L	12705040	spict	spict-cds	synonymous	52	0.325	13	T	C	C
3R	26827910	CG33773	-33158	intergenic	36	0.225	11	C	A	C	0.74375	38.5855	5.2406e-10	3R	10544438	kibra	kibra-in	intronic	34	0.21118	14	T	A	T
3R	26827910	CG31007	9731	intergenic	36	0.225	11	C	A	C	0.74375	38.5855	5.2406e-10	3R	10544438	kibra	kibra-in	intronic	34	0.21118	14	T	A	T
3R	26827910	5-HT7	5-HT7-in	intronic	36	0.225	11	C	A	C	0.74375	38.5855	5.2406e-10	3R	10544438	kibra	kibra-in	intronic	34	0.21118	14	T	A	T
3R	23954216	CG34354	-18330	intergenic	45	0.283019	15	C	T	C	-0.5646	38.5833	5.24654e-10	2R	18265111	Rtf1	Rtf1-in	intronic	77	0.472393	23	A	G	G
3R	23954216	CG34362	42732	intergenic	45	0.283019	15	C	T	C	-0.5646	38.5833	5.24654e-10	2R	18265111	Rtf1	Rtf1-in	intronic	77	0.472393	23	A	G	G
3R	25029949	CR31044	-10335	intergenic	44	0.273292	15	G	A	G	0.5351	38.5794	5.25712e-10	2R	18159788	dve	dve-in	intronic	49	0.29878	20	C	A	C
3R	25029949	CG14508	94	intergenic	44	0.273292	15	G	A	G	0.5351	38.5794	5.25712e-10	2R	18159788	dve	dve-in	intronic	49	0.29878	20	C	A	C
3L	17275357	mir-219	-32749	intergenic	71	0.435583	11	T	G	G	0.68453	38.5764	5.26511e-10	2R	6406490	lola	lola-u3	UTR	17	0.101796	15	G	C	G
3L	17275357	mir-219	-32749	intergenic	71	0.435583	11	T	G	G	0.68453	38.5764	5.26511e-10	2R	6406490	lola	lola-u3	UTR	17	0.101796	15	G	C	G
3L	17275357	CG13723	17271	intergenic	71	0.435583	11	T	G	G	0.68453	38.5764	5.26511e-10	2R	6406490	lola	lola-u3	UTR	17	0.101796	15	G	C	G
3L	17275357	CG13723	17271	intergenic	71	0.435583	11	T	G	G	0.68453	38.5764	5.26511e-10	2R	6406490	lola	lola-u3	UTR	17	0.101796	15	G	C	G
3L	7631171	CG33275	CG33275:17	synonymous	78	0.472727	21	C	T	C	-0.58621	38.575	5.26904e-10	3L	14070581	btl	btl-in	intronic	33	0.20625	11	C	G	C
2R	14593460	CG15073	-27	intergenic	22	0.13253	15	C	A	C	-0.69135	38.5723	5.27625e-10	2R	10453588	ttv	ttv-in	intronic	69	0.425926	14	G	T	G
2R	14593460	CG15071	8701	intergenic	22	0.13253	15	C	A	C	-0.69135	38.5723	5.27625e-10	2R	10453588	ttv	ttv-in	intronic	69	0.425926	14	G	T	G
3L	5342522	lama	lama-in	intronic	27	0.171975	7	T	G	T	0.67416	38.5631	5.30128e-10	2R	6598457	stan	stan:5	synonymous	72	0.444444	26	A	C	A
3L	8383007	ImpE1	ImpE1:6	synonymous	20	0.141844	5	C	G	C	-0.89421	38.5528	5.32912e-10	3R	25305240	Ptp99A	Ptp99A-in	intronic	45	0.276074	19	A	G	A
X	8903751	CG32709	-16498	intergenic	81	0.490909	8	C	T	T	-0.56648	38.5525	5.32998e-10	2R	9353528	arr	arr-in	intronic	28	0.178344	5	A	T	A
X	8903751	mir-31b	16287	intergenic	81	0.490909	8	C	T	T	-0.56648	38.5525	5.32998e-10	2R	9353528	arr	arr-in	intronic	28	0.178344	5	A	T	A
X	8903751	CG10962	CG10962-in	intronic	81	0.490909	8	C	T	T	-0.56648	38.5525	5.32998e-10	2R	9353528	arr	arr-in	intronic	28	0.178344	5	A	T	A
X	8903751	rdgA	rdgA-in	intronic	81	0.490909	8	C	T	T	-0.56648	38.5525	5.32998e-10	2R	9353528	arr	arr-in	intronic	28	0.178344	5	A	T	A
3L	14650230	dlp	dlp-in	intronic	49	0.310127	13	A	C	A	0.60283	38.5482	5.34183e-10	3R	25271834	Ptp99A	Ptp99A-in	intronic	51	0.398438	5	C	G	C
2R	10368552	L	-156	intergenic	19	0.113772	15	A	G	A	0.72078	38.5444	5.35235e-10	3L	4234643	ImpL2	ImpL2-in	intronic	75	0.454545	16	A	G	G
2R	10368552	Oaz	15590	intergenic	19	0.113772	15	A	G	A	0.72078	38.5444	5.35235e-10	3L	4234643	ImpL2	ImpL2-in	intronic	75	0.454545	16	A	G	G
2R	10368878	L	L-u5	UTR	19	0.113772	20	A	G	A	0.72078	38.5444	5.35235e-10	3L	4234643	ImpL2	ImpL2-in	intronic	75	0.454545	16	A	G	G
3L	11822725	CG7264	CG7264-cds	synonymous	53	0.323171	17	A	C	A	0.66643	38.5413	5.36063e-10	3L	8444536	Gug	Gug-in	intronic	16	0.107383	9	G	A	G
3L	11822725	CycA	CycA-in	synonymous	53	0.323171	17	A	C	A	0.66643	38.5413	5.36063e-10	3L	8444536	Gug	Gug-in	intronic	16	0.107383	9	G	A	G
2R	12314739	CG4398	-4939	intergenic	20	0.122699	11	T	A	T	-0.74345	38.5392	5.36658e-10	X	18460170	Bx	Bx-in	intronic	46	0.283951	12	A	T	T
2R	12314739	Menl-1	7836	intergenic	20	0.122699	11	T	A	T	-0.74345	38.5392	5.36658e-10	X	18460170	Bx	Bx-in	intronic	46	0.283951	12	A	T	T
2R	12314739	CG33960	CG33960-in	intronic	20	0.122699	11	T	A	T	-0.74345	38.5392	5.36658e-10	X	18460170	Bx	Bx-in	intronic	46	0.283951	12	A	T	T
X	17152637	CG8664	-23173	intergenic	22	0.13253	11	A	T	A	-0.8872	38.5373	5.37186e-10	2L	3919944	fred	fred-in	intronic	38	0.242038	9	A	T	A
X	17152637	CG8675	9062	intergenic	22	0.13253	11	A	T	A	-0.8872	38.5373	5.37186e-10	2L	3919944	fred	fred-in	intronic	38	0.242038	9	A	T	A
X	17152637	f	f-in	intronic	22	0.13253	11	A	T	A	-0.8872	38.5373	5.37186e-10	2L	3919944	fred	fred-in	intronic	38	0.242038	9	A	T	A
3L	7816725	Pdp1	Pdp1-in	intronic	10	0.0641026	11	T	G	T	-0.74635	38.5345	5.37936e-10	2R	7075296	shn	shn-in	intronic	66	0.402439	14	C	G	G
2R	9474682	CG6191	CG6191-in	intronic	29	0.176829	14	A	G	A	0.67667	38.519	5.42243e-10	2L	15336708	esg	558	intergenic	33	0.20122	11	C	T	C
2L	4295391	tutl	tutl-cds	missense	37	0.224242	16	C	A	C	-0.59472	38.5065	5.45716e-10	X	5583969	cv	-60	intergenic	56	0.335329	14	C	A	C
3R	22944812	CG5882	CG5882:3	synonymous	39	0.239264	17	G	A	G	-0.55037	38.5065	5.45724e-10	X	18452730	Bx	Bx-in	intronic	72	0.431138	14	G	A	A
3L	16750435	Nrt	-8739	intergenic	25	0.152439	16	C	T	C	-0.73855	38.5006	5.47373e-10	3R	15148570	Dl	Dl-in	intronic	33	0.20122	13	C	G	C
3L	16750435	CG42852	1615	intergenic	25	0.152439	16	C	T	C	-0.73855	38.5006	5.47373e-10	3R	15148570	Dl	Dl-in	intronic	33	0.20122	13	C	G	C
2L	14790533	CG18420	-4835	intergenic	65	0.416667	15	T	C	T	-0.63613	38.484	5.52055e-10	3R	27436089	CycG	CycG-in	intronic	32	0.196319	15	C	G	C
2L	14790533	CG18420	-4835	intergenic	65	0.416667	15	T	C	T	-0.63613	38.484	5.52055e-10	3R	27436089	CycG	CycG-in	intronic	32	0.196319	15	C	G	C
2L	14790533	CG18636	5947	intergenic	65	0.416667	15	T	C	T	-0.63613	38.484	5.52055e-10	3R	27436089	CycG	CycG-in	intronic	32	0.196319	15	C	G	C
2L	14790533	CG18636	5947	intergenic	65	0.416667	15	T	C	T	-0.63613	38.484	5.52055e-10	3R	27436089	CycG	CycG-in	intronic	32	0.196319	15	C	G	C
3R	25054603	CG15817	-285	intergenic	43	0.265432	12	A	G	A	-0.62756	38.4809	5.52915e-10	X	18460247	Bx	Bx-in	intronic	48	0.294479	10	A	C	C
3R	25054606	CG15817	-282	intergenic	44	0.269939	11	A	G	A	-0.62756	38.4809	5.52915e-10	X	18460247	Bx	Bx-in	intronic	48	0.294479	10	A	C	C
3R	25054603	CG14507	1156	intergenic	43	0.265432	12	A	G	A	-0.62756	38.4809	5.52915e-10	X	18460247	Bx	Bx-in	intronic	48	0.294479	10	A	C	C
3R	25054606	CG14507	1159	intergenic	44	0.269939	11	A	G	A	-0.62756	38.4809	5.52915e-10	X	18460247	Bx	Bx-in	intronic	48	0.294479	10	A	C	C
3L	18338881	rpr	-51772	intergenic	67	0.421384	6	A	G	G	0.51769	38.4664	5.57046e-10	2L	7920746	Snoo	Snoo-in	intronic	67	0.432258	15	A	G	A
3L	18338881	grim	41367	intergenic	67	0.421384	6	A	G	G	0.51769	38.4664	5.57046e-10	2L	7920746	Snoo	Snoo-in	intronic	67	0.432258	15	A	G	A
2R	11455238	Flo	Flo-in	intronic	27	0.164634	16	G	A	G	0.65385	38.4601	5.58834e-10	3R	27437993	CycG	CycG-in	intronic	66	0.404908	20	C	T	C
2R	11455238	Flo	Flo-in	intronic	27	0.164634	16	G	A	G	0.65385	38.4601	5.58834e-10	3R	27437993	CycG	CycG-in	intronic	66	0.404908	20	C	T	C
2R	11455238	Flo	Flo-in	intronic	27	0.164634	16	G	A	G	0.65385	38.4601	5.58834e-10	3R	27437993	Med	Med-in	intronic	66	0.404908	20	C	T	C
2R	11455238	Flo	Flo-in	intronic	27	0.164634	16	G	A	G	0.65385	38.4601	5.58834e-10	3R	27437993	Med	Med-in	intronic	66	0.404908	20	C	T	C
3L	11896967	CG11588	-17699	intergenic	53	0.33125	8	C	T	C	0.63044	38.457	5.59734e-10	3R	26135018	hdc	hdc-in	intronic	36	0.223602	19	A	G	G
3L	11896967	CG5897	13195	intergenic	53	0.33125	8	C	T	C	0.63044	38.457	5.59734e-10	3R	26135018	hdc	hdc-in	intronic	36	0.223602	19	A	G	G
2L	5549352	Oscillin	Oscillin-in	intronic	39	0.261745	6	T	A	T	0.54599	38.4495	5.61891e-10	2R	17410655	Egfr	Egfr-cds	missense	79	0.490683	14	T	G	G
2L	5549352	Oscillin	Oscillin-in	intronic	39	0.261745	6	T	A	T	0.54599	38.4495	5.61891e-10	2R	17410655	Egfr	Egfr-cds	missense	79	0.490683	14	T	G	G
X	13869906	ben	-20481	intergenic	77	0.487342	8	T	C	T	-0.59709	38.4391	5.6489e-10	3L	18169407	W	W-in	intronic	27	0.166667	19	G	A	G
X	13869906	CG11068	19299	intergenic	77	0.487342	8	T	C	T	-0.59709	38.4391	5.6489e-10	3L	18169407	W	W-in	intronic	27	0.166667	19	G	A	G
3R	14429250	CG7695	-13226	intergenic	33	0.208861	8	T	A	T	-0.65035	38.4287	5.67898e-10	2R	2008283	EcR	EcR-in	intronic	40	0.246914	22	C	A	C
3R	14429250	CG14305	3431	intergenic	33	0.208861	8	T	A	T	-0.65035	38.4287	5.67898e-10	2R	2008283	EcR	EcR-in	intronic	40	0.246914	22	C	A	C
3R	14429250	CG14304	CG14304-in	intronic	33	0.208861	8	T	A	T	-0.65035	38.4287	5.67898e-10	2R	2008283	EcR	EcR-in	intronic	40	0.246914	22	C	A	C
3L	9987129	dpr6	dpr6-in	intronic	66	0.402439	12	T	G	T	-0.48664	38.4285	5.67958e-10	2R	12909330	Ark	Ark-in	intronic	72	0.436364	18	C	G	C
X	16552396	r	r:3	synonymous	69	0.415663	13	G	T	G	0.61538	38.4151	5.71873e-10	2R	18262141	Rtf1	-456	intergenic	36	0.218182	12	A	T	A
2R	10368425	L	-283	intergenic	17	0.104938	9	C	T	C	0.72233	38.4063	5.74462e-10	3L	4234643	ImpL2	ImpL2-in	intronic	75	0.454545	16	A	G	G
2R	10368425	Oaz	15463	intergenic	17	0.104938	9	C	T	C	0.72233	38.4063	5.74462e-10	3L	4234643	ImpL2	ImpL2-in	intronic	75	0.454545	16	A	G	G
3L	353400	CG1231	-3022	intergenic	33	0.202454	12	A	G	A	0.58921	38.3924	5.7857e-10	2L	387298	al	al-u3	UTR	61	0.393548	21	G	A	G
3L	353400	mth	6232	intergenic	33	0.202454	12	A	G	A	0.58921	38.3924	5.7857e-10	2L	387298	al	al-u3	UTR	61	0.393548	21	G	A	G
3L	353400	Ptpmeg	Ptpmeg:15	synonymous	33	0.202454	12	A	G	A	0.58921	38.3924	5.7857e-10	2L	387298	al	al-u3	UTR	61	0.393548	21	G	A	G
2L	387298	al	al-u3	UTR	61	0.393548	21	G	A	G	0.58921	38.3924	5.7857e-10	3L	353400	Ptpmeg	Ptpmeg:15	synonymous	33	0.202454	12	A	G	A
2R	14748907	Jheh3	Jheh3:2	nonsense	81	0.487952	15	A	G	A	-0.66223	38.3914	5.78872e-10	2R	13712142	grh	grh-in	intronic	39	0.237805	14	C	T	C
3R	11550799	CG34274	-6669	intergenic	46	0.291139	10	C	T	C	-0.6333	38.3909	5.79014e-10	3L	8018022	nmo	nmo-in	intronic	44	0.280255	7	T	A	A
3R	11550799	CG31294	8492	intergenic	46	0.291139	10	C	T	C	-0.6333	38.3909	5.79014e-10	3L	8018022	nmo	nmo-in	intronic	44	0.280255	7	T	A	A
3R	19049525	CG13826	CG13826-in	intronic	59	0.378205	7	T	G	T	-0.67476	38.3898	5.79331e-10	3L	13245911	caps	caps-in	intronic	28	0.169697	15	A	T	A
2R	7574717	wal	-1715	intergenic	18	0.107784	14	G	A	G	-0.72009	38.3748	5.83805e-10	2R	9754848	shot	shot-in	intronic	80	0.496894	18	A	T	T
2R	7574717	CG13196	780	intergenic	18	0.107784	14	G	A	G	-0.72009	38.3748	5.83805e-10	2R	9754848	shot	shot-in	intronic	80	0.496894	18	A	T	T
2R	7574717	Buffy	Buffy-in	intronic	18	0.107784	14	G	A	G	-0.72009	38.3748	5.83805e-10	2R	9754848	shot	shot-in	intronic	80	0.496894	18	A	T	T
2L	3628977	for	for-in	intronic	75	0.46875	22	G	A	A	0.7345	38.3737	5.84136e-10	X	2436373	trol	trol-in	intronic	20	0.11976	12	G	C	G
3L	17275396	mir-219	-32710	intergenic	70	0.454545	11	G	A	A	0.68111	38.3581	5.88842e-10	2R	6406490	lola	lola-u3	UTR	17	0.101796	15	G	C	G
3L	17275396	mir-219	-32710	intergenic	70	0.454545	11	G	A	A	0.68111	38.3581	5.88842e-10	2R	6406490	lola	lola-u3	UTR	17	0.101796	15	G	C	G
3L	17275396	CG13723	17310	intergenic	70	0.454545	11	G	A	A	0.68111	38.3581	5.88842e-10	2R	6406490	lola	lola-u3	UTR	17	0.101796	15	G	C	G
3L	17275396	CG13723	17310	intergenic	70	0.454545	11	G	A	A	0.68111	38.3581	5.88842e-10	2R	6406490	lola	lola-u3	UTR	17	0.101796	15	G	C	G
2R	15253775	CG10051	CG10051-in	intronic	65	0.396341	18	T	C	T	0.69905	38.3525	5.90528e-10	3L	8857564	dally	dally-in	intronic	23	0.141104	13	G	A	A
3L	10606940	CG42521	-9226	intergenic	39	0.240741	12	T	A	T	-0.53616	38.3479	5.91912e-10	X	4373906	bi	bi-in	intronic	79	0.473054	14	T	C	T
3L	10606940	CG6527	54758	intergenic	39	0.240741	12	T	A	T	-0.53616	38.3479	5.91912e-10	X	4373906	bi	bi-in	intronic	79	0.473054	14	T	C	T
X	20299949	CG11710	CG11710:6	synonymous	77	0.484277	9	T	A	T	-0.52892	38.3217	5.99905e-10	2R	9758429	shot	shot-in	intronic	43	0.265432	18	A	T	T
2L	15242871	ZnT35C	ZnT35C-in	intronic	66	0.417722	13	T	G	G	-0.58404	38.3178	6.01116e-10	2L	12610321	nub	nub-in	intronic	41	0.257862	13	G	C	G
3R	17370796	slou	-3579	intergenic	50	0.326797	13	T	C	C	-0.53177	38.3114	6.03101e-10	2L	5229881	tkv	tkv-in	intronic	59	0.373418	15	T	C	T
3R	17370796	CG15499	12907	intergenic	50	0.326797	13	T	C	C	-0.53177	38.3114	6.03101e-10	2L	5229881	tkv	tkv-in	intronic	59	0.373418	15	T	C	T
3L	7816733	Pdp1	Pdp1-in	intronic	15	0.0920245	9	T	A	T	0.6895	38.3075	6.04303e-10	X	18441927	Bx	Bx-in	intronic	81	0.48503	12	G	A	G
3R	10055712	CG9616	-14814	intergenic	43	0.263804	14	G	A	G	-0.66385	38.3064	6.04644e-10	2R	15020156	botv	botv-cds	synonymous	33	0.2	19	A	C	A
3R	10055712	CG9624	830	intergenic	43	0.263804	14	G	A	G	-0.66385	38.3064	6.04644e-10	2R	15020156	botv	botv-cds	synonymous	33	0.2	19	A	C	A
2L	5631398	CG31646	CG31646-in	intronic	38	0.230303	18	G	A	G	0.57252	38.3028	6.05753e-10	2R	9355785	arr	arr-in	intronic	61	0.371951	13	G	A	G
3L	7702721	Ank2	Ank2-cds	synonymous	44	0.26506	20	A	G	A	0.82789	38.2985	6.07076e-10	3L	12730661	Ptp69D	Ptp69D:3	synonymous	23	0.137725	20	T	C	T
3L	7702721	CG32373	CG32373-in	synonymous	44	0.26506	20	A	G	A	0.82789	38.2985	6.07076e-10	3L	12730661	Ptp69D	Ptp69D:3	synonymous	23	0.137725	20	T	C	T
X	14456946	CG14414	-17695	intergenic	77	0.461078	14	A	G	A	0.47209	38.2791	6.13155e-10	X	15722549	Chc	Chc-in	intronic	65	0.389222	17	A	G	A
X	14456946	CG12540	65671	intergenic	77	0.461078	14	A	G	A	0.47209	38.2791	6.13155e-10	X	15722549	Chc	Chc-in	intronic	65	0.389222	17	A	G	A
2L	8992451	CG9555	CG9555-in	intronic	70	0.443038	8	A	C	A	0.56264	38.2769	6.13837e-10	2L	5299650	vri	vri-u5	UTR	47	0.297468	13	T	C	T
3L	17275400	mir-219	-32706	intergenic	70	0.454545	11	G	A	A	0.68448	38.2683	6.16561e-10	2R	6406490	lola	lola-u3	UTR	17	0.101796	15	G	C	G
3L	17275400	mir-219	-32706	intergenic	70	0.454545	11	G	A	A	0.68448	38.2683	6.16561e-10	2R	6406490	lola	lola-u3	UTR	17	0.101796	15	G	C	G
3L	17275400	CG13723	17314	intergenic	70	0.454545	11	G	A	A	0.68448	38.2683	6.16561e-10	2R	6406490	lola	lola-u3	UTR	17	0.101796	15	G	C	G
3L	17275400	CG13723	17314	intergenic	70	0.454545	11	G	A	A	0.68448	38.2683	6.16561e-10	2R	6406490	lola	lola-u3	UTR	17	0.101796	15	G	C	G
2R	18224483	CG11206	CG11206-in	intronic	70	0.432099	19	T	C	T	-0.58305	38.2628	6.18314e-10	2R	17442627	Egfr	Egfr-in	intronic	44	0.268293	18	C	T	C
2R	18224483	CG11206	CG11206-in	intronic	70	0.432099	19	T	C	T	-0.58305	38.2628	6.18314e-10	2R	17442627	Egfr	Egfr-in	intronic	44	0.268293	18	C	T	C
3R	23359442	CG12885	CG12885-u3	UTR	76	0.490323	13	A	G	A	-0.49571	38.2614	6.18738e-10	3R	26125295	hdc	hdc-in	intronic	72	0.455696	15	T	C	C
2L	5388710	H15	-15632	intergenic	61	0.376543	12	G	A	A	0.59558	38.2519	6.21762e-10	X	8782717	Moe	Moe-in	intronic	37	0.221557	9	A	G	A
2L	5388710	CG42850	7656	intergenic	61	0.376543	12	G	A	A	0.59558	38.2519	6.21762e-10	X	8782717	Moe	Moe-in	intronic	37	0.221557	9	A	G	A
2R	16737413	CG17999	CG17999-u5	UTR	24	0.146341	21	T	C	T	-0.76777	38.2517	6.21838e-10	3L	9637513	fry	fry-in	UTR	47	0.284848	9	T	C	T
3L	5593801	CG10590	-395	intergenic	67	0.411043	11	A	C	A	-0.59212	38.2496	6.22506e-10	2R	2008321	EcR	EcR-in	intronic	35	0.213415	20	G	T	G
3L	5593801	CG10591	1012	intergenic	67	0.411043	11	A	C	A	-0.59212	38.2496	6.22506e-10	2R	2008321	EcR	EcR-in	intronic	35	0.213415	20	G	T	G
2R	3768664	CG30377	-8916	intergenic	53	0.32716	18	T	C	T	0.52588	38.238	6.26196e-10	3R	26127533	hdc	hdc-in	intronic	7	0.0642202	7	T	A	T
2R	3768664	Dgk	20089	intergenic	53	0.32716	18	T	C	T	0.52588	38.238	6.26196e-10	3R	26127533	hdc	hdc-in	intronic	7	0.0642202	7	T	A	T
2R	12373336	CG33458	-843	intergenic	67	0.408537	10	A	T	T	0.61456	38.2352	6.27108e-10	2R	18262141	Rtf1	-456	intergenic	36	0.218182	12	A	T	A
2R	12373336	CG15712	279	intergenic	67	0.408537	10	A	T	T	0.61456	38.2352	6.27108e-10	2R	18262141	Rtf1	-456	intergenic	36	0.218182	12	A	T	A
2L	16455155	dac	-11355	intergenic	53	0.33758	17	T	C	T	-0.52807	38.2314	6.28335e-10	2L	708124	ds	ds-in	intronic	61	0.386076	18	C	T	T
2L	16455155	dac	-11355	intergenic	53	0.33758	17	T	C	T	-0.52807	38.2314	6.28335e-10	2L	708124	ds	ds-in	intronic	61	0.386076	18	C	T	T
2L	16455155	Idgf3	1979	intergenic	53	0.33758	17	T	C	T	-0.52807	38.2314	6.28335e-10	2L	708124	ds	ds-in	intronic	61	0.386076	18	C	T	T
2L	16455155	Idgf3	1979	intergenic	53	0.33758	17	T	C	T	-0.52807	38.2314	6.28335e-10	2L	708124	ds	ds-in	intronic	61	0.386076	18	C	T	T
2R	12373326	CG33458	-853	intergenic	67	0.408537	11	A	T	T	0.61043	38.2295	6.28933e-10	2R	18262141	Rtf1	-456	intergenic	36	0.218182	12	A	T	A
2R	12373326	CG15712	269	intergenic	67	0.408537	11	A	T	T	0.61043	38.2295	6.28933e-10	2R	18262141	Rtf1	-456	intergenic	36	0.218182	12	A	T	A
3L	4613246	Src64B	Src64B-in	intronic	26	0.157576	11	C	A	C	0.62005	38.2283	6.29325e-10	X	3030217	N	N-in	intronic	56	0.341463	14	C	A	A
3L	5593787	CG10590	-409	intergenic	69	0.420732	12	A	G	A	-0.58809	38.2276	6.29551e-10	2R	2008321	EcR	EcR-in	intronic	35	0.213415	20	G	T	G
3L	5593787	CG10591	998	intergenic	69	0.420732	12	A	G	A	-0.58809	38.2276	6.29551e-10	2R	2008321	EcR	EcR-in	intronic	35	0.213415	20	G	T	G
3R	13691887	tinc	tinc:8	synonymous	63	0.391304	13	A	G	G	0.51438	38.2242	6.30658e-10	2L	684626	ds	ds-in	intronic	59	0.378205	16	A	C	A
3R	13691887	tinc	tinc:8	synonymous	63	0.391304	13	A	G	G	0.51438	38.2242	6.30658e-10	2L	684626	ds	ds-in	intronic	59	0.378205	16	A	C	A
2L	844270	drongo	drongo-in	intronic	56	0.35443	12	G	T	T	0.58344	38.222	6.31372e-10	2R	9761068	shot	shot:16	synonymous	46	0.283951	27	C	T	C
3R	19186681	CG4408	-930	intergenic	36	0.220859	21	A	G	A	0.60568	38.2114	6.34801e-10	2L	1050451	S	-426	intergenic	58	0.36478	25	T	C	C
3R	19186681	RpS3	984	intergenic	36	0.220859	21	A	G	A	0.60568	38.2114	6.34801e-10	2L	1050451	S	-426	intergenic	58	0.36478	25	T	C	C
3L	544030	hipk	hipk-in	intronic	62	0.371257	14	T	A	T	0.50528	38.2046	6.37015e-10	2L	5302686	vri	vri-in	intronic	75	0.483871	18	T	C	T
3R	26967138	Gycbeta100B	Gycbeta100B-in	intronic	20	0.121951	19	G	A	G	-0.7093	38.2029	6.37566e-10	2R	15557956	hrg	630	intergenic	72	0.45	7	A	G	G
X	13510541	Tango2	-484	intergenic	54	0.327273	11	A	T	T	0.56991	38.1712	6.48011e-10	3L	4157909	nab	nab-in	intronic	45	0.27439	10	C	T	T
X	13510541	tth	154	intergenic	54	0.327273	11	A	T	T	0.56991	38.1712	6.48011e-10	3L	4157909	nab	nab-in	intronic	45	0.27439	10	C	T	T
3R	14429250	CG7695	-13226	intergenic	33	0.208861	8	T	A	T	-0.67859	38.1677	6.49181e-10	2R	2008321	EcR	EcR-in	intronic	35	0.213415	20	G	T	G
3R	14429250	CG14305	3431	intergenic	33	0.208861	8	T	A	T	-0.67859	38.1677	6.49181e-10	2R	2008321	EcR	EcR-in	intronic	35	0.213415	20	G	T	G
3R	14429250	CG14304	CG14304-in	intronic	33	0.208861	8	T	A	T	-0.67859	38.1677	6.49181e-10	2R	2008321	EcR	EcR-in	intronic	35	0.213415	20	G	T	G
3R	6538462	CG4073	-2058	intergenic	62	0.4	13	C	T	T	0.55673	38.1555	6.53241e-10	X	4323472	bi	bi-cds	synonymous	51	0.309091	10	G	A	A
3R	6538462	CG14689	1492	intergenic	62	0.4	13	C	T	T	0.55673	38.1555	6.53241e-10	X	4323472	bi	bi-cds	synonymous	51	0.309091	10	G	A	A
3L	8472285	CG43163	CG43163:5	synonymous	36	0.218182	17	T	C	T	-0.57872	38.1535	6.53924e-10	3R	11851489	pnr	-330	intergenic	46	0.280488	19	A	G	A
X	21045585	CG14579	-18695	intergenic	25	0.159236	11	T	G	T	0.63106	38.1417	6.57886e-10	3L	2728412	Mrtf	Mrtf-in	intronic	76	0.460606	22	G	C	C
X	21045585	CG32511	17493	intergenic	25	0.159236	11	T	G	T	0.63106	38.1417	6.57886e-10	3L	2728412	Mrtf	Mrtf-in	intronic	76	0.460606	22	G	C	C
3L	4705120	CG13712	-4383	intergenic	39	0.23494	19	T	G	G	-0.61693	38.1249	6.63579e-10	3R	23019793	Ser	77	intergenic	54	0.335404	13	T	A	A
3L	4705120	CG13713	7142	intergenic	39	0.23494	19	T	G	G	-0.61693	38.1249	6.63579e-10	3R	23019793	Ser	77	intergenic	54	0.335404	13	T	A	A
3L	4705120	Gef64C	Gef64C-in	intronic	39	0.23494	19	T	G	G	-0.61693	38.1249	6.63579e-10	3R	23019793	Ser	77	intergenic	54	0.335404	13	T	A	A
3L	10653747	CG8003	-832	intergenic	37	0.222892	15	G	A	G	-0.65135	38.1245	6.6371e-10	3R	26187167	hdc	hdc-u3	missense	44	0.289474	8	A	T	A
3L	10653747	CG14153	16032	intergenic	37	0.222892	15	G	A	G	-0.65135	38.1245	6.6371e-10	3R	26187167	hdc	hdc-u3	missense	44	0.289474	8	A	T	A
3L	10653747	CG32066	CG32066-in	intronic	37	0.222892	15	G	A	G	-0.65135	38.1245	6.6371e-10	3R	26187167	hdc	hdc-u3	missense	44	0.289474	8	A	T	A
X	6207709	CG15894	-2422	intergenic	19	0.113772	10	A	C	A	0.69889	38.1068	6.69763e-10	X	4320344	bi	bi-in	intronic	45	0.269461	6	T	C	T
X	6207709	CG3823	6931	intergenic	19	0.113772	10	A	C	A	0.69889	38.1068	6.69763e-10	X	4320344	bi	bi-in	intronic	45	0.269461	6	T	C	T
2L	1675321	chinmo	chinmo-in	intronic	36	0.227848	15	T	C	C	-0.55539	38.1014	6.71608e-10	X	4313449	bi	bi-in	intronic	68	0.407186	13	C	T	T
X	4313449	bi	bi-in	intronic	68	0.407186	13	C	T	T	-0.55539	38.1014	6.71608e-10	2L	1675321	chinmo	chinmo-in	intronic	36	0.227848	15	T	C	C
3L	10132862	dpr10	-7691	intergenic	51	0.307229	16	C	T	T	-0.64224	38.1009	6.71788e-10	2L	5257547	tkv	tkv-in	intronic	36	0.220859	15	G	T	G
3L	10132862	CG42826	38881	intergenic	51	0.307229	16	C	T	T	-0.64224	38.1009	6.71788e-10	2L	5257547	tkv	tkv-in	intronic	36	0.220859	15	G	T	G
3R	21671428	CG14545	-4697	intergenic	48	0.296296	12	C	T	C	0.58559	38.0983	6.72689e-10	3L	4161004	nab	72	intergenic	51	0.314815	11	A	G	A
3R	21671428	alpha4GT2	3141	intergenic	48	0.296296	12	C	T	C	0.58559	38.0983	6.72689e-10	3L	4161004	nab	72	intergenic	51	0.314815	11	A	G	A
3L	1496033	CG12084	CG12084-in	intronic	46	0.277108	22	C	G	G	0.54504	38.0941	6.74125e-10	3L	3366181	kst	kst-in	intronic	51	0.303571	18	G	A	G
3L	17256332	CG13723	-1184	intergenic	36	0.227848	7	C	A	C	-0.60478	38.0805	6.78837e-10	2L	2926662	lilli	lilli-in	intronic	62	0.407895	10	G	A	A
3L	17256332	CG6497	9229	intergenic	36	0.227848	7	C	A	C	-0.60478	38.0805	6.78837e-10	2L	2926662	lilli	lilli-in	intronic	62	0.407895	10	G	A	A
3R	12489817	Ubx	Ubx-in	intronic	66	0.4125	14	G	C	C	0.55576	38.0785	6.79559e-10	2L	7954402	Snoo	Snoo-in	intronic	54	0.341772	12	T	A	T
2L	9724116	Nckx30C	Nckx30C-in	intronic	71	0.446541	16	A	G	A	0.48187	38.0752	6.80709e-10	3L	13226839	caps	caps-in	intronic	79	0.478788	17	G	C	G
3R	19444874	CG31145	CG31145-in	intronic	42	0.267516	17	G	A	G	0.73114	38.0722	6.81728e-10	3R	26158346	hdc	hdc-in	intronic	25	0.152439	17	T	C	T
3R	12711446	CG31270	-36945	intergenic	51	0.320755	10	C	T	C	-0.50059	38.0665	6.83723e-10	3L	6788298	vvl	661	intergenic	76	0.45509	17	C	T	C
3R	12711446	mir-iab-4	29382	intergenic	51	0.320755	10	C	T	C	-0.50059	38.0665	6.83723e-10	3L	6788298	vvl	661	intergenic	76	0.45509	17	C	T	C
X	10428087	spri	spri-in	intronic	46	0.285714	5	C	T	C	0.5355	38.0613	6.8558e-10	3L	7985976	nmo	nmo-in	intronic	75	0.460123	12	A	C	A
2R	5384372	Wnt2	Wnt2-in	intronic	70	0.44586	10	G	A	G	-0.51746	38.0537	6.88237e-10	2R	6598568	stan	stan:5	synonymous	64	0.392638	28	T	A	T
X	21393014	CG32822	CG32822-u3	intergenic	55	0.333333	12	T	C	C	-0.51846	38.0456	6.91113e-10	3R	6403430	hth	hth-in	intronic	73	0.464968	18	G	A	G
2R	10368463	L	-245	intergenic	16	0.0981595	9	C	A	C	0.71824	38.0388	6.93502e-10	3L	4234643	ImpL2	ImpL2-in	intronic	75	0.454545	16	A	G	G
2R	10368463	Oaz	15501	intergenic	16	0.0981595	9	C	A	C	0.71824	38.0388	6.93502e-10	3L	4234643	ImpL2	ImpL2-in	intronic	75	0.454545	16	A	G	G
3L	17872847	CG7408	CG7408-in	intronic	68	0.419753	11	A	G	A	0.66838	38.0304	6.96498e-10	2R	7061103	shn	-222	intergenic	34	0.207317	18	G	A	G
X	4302725	bi	-4164	intergenic	53	0.321212	14	C	A	A	0.64627	38.0164	7.0151e-10	2R	11714531	Poxn	Poxn-u3	UTR	18	0.109091	21	G	A	G
X	4302725	CG32773	20441	intergenic	53	0.321212	14	C	A	A	0.64627	38.0164	7.0151e-10	2R	11714531	Poxn	Poxn-u3	UTR	18	0.109091	21	G	A	G
2R	6024478	gem	gem-cds	synonymous	58	0.358025	17	A	G	G	-0.51683	38.0119	7.03156e-10	2R	11714462	Poxn	Poxn-u3	UTR	43	0.26875	18	A	G	G
X	5931551	CG5941	-358	intergenic	80	0.484848	13	G	A	A	0.47355	38.011	7.03486e-10	2L	4373549	Traf4	Traf4-in	intronic	68	0.462585	15	A	T	T
X	5931551	rux	330	intergenic	80	0.484848	13	G	A	A	0.47355	38.011	7.03486e-10	2L	4373549	Traf4	Traf4-in	intronic	68	0.462585	15	A	T	T
X	17927368	CG15373	-10736	intergenic	34	0.228188	5	A	C	A	0.83741	37.9903	7.10973e-10	3R	7473274	Csk	Csk-in	intronic	27	0.171975	10	A	T	A
X	17927368	CG15373	-10736	intergenic	34	0.228188	5	A	C	A	0.83741	37.9903	7.10973e-10	3R	7473274	Csk	Csk-in	intronic	27	0.171975	10	A	T	A
X	17927368	CG6867	5074	intergenic	34	0.228188	5	A	C	A	0.83741	37.9903	7.10973e-10	3R	7473274	Csk	Csk-in	intronic	27	0.171975	10	A	T	A
X	17927368	CG6867	5074	intergenic	34	0.228188	5	A	C	A	0.83741	37.9903	7.10973e-10	3R	7473274	Csk	Csk-in	intronic	27	0.171975	10	A	T	A
X	17927368	Sh	Sh-in	intronic	34	0.228188	5	A	C	A	0.83741	37.9903	7.10973e-10	3R	7473274	Csk	Csk-in	intronic	27	0.171975	10	A	T	A
X	17927368	Sh	Sh-in	intronic	34	0.228188	5	A	C	A	0.83741	37.9903	7.10973e-10	3R	7473274	Csk	Csk-in	intronic	27	0.171975	10	A	T	A
X	17248465	B-H1	-43069	intergenic	74	0.448485	10	T	C	C	0.55242	37.9898	7.11173e-10	2R	9787403	shot	shot-in	intronic	36	0.222222	12	G	C	G
X	17248465	B-H2	30270	intergenic	74	0.448485	10	T	C	C	0.55242	37.9898	7.11173e-10	2R	9787403	shot	shot-in	intronic	36	0.222222	12	G	C	G
X	2544094	sgg	sgg-in	intronic	37	0.220238	17	G	A	A	0.61557	37.9858	7.12595e-10	2R	9842856	AGO1	AGO1-in	synonymous	40	0.242424	18	G	A	G
2L	7909376	Snoo	Snoo-in	intronic	42	0.264151	13	G	A	G	-0.65687	37.9853	7.12779e-10	2R	16711885	insc	insc:3	missense	38	0.233129	16	C	T	T
2R	16711885	insc	insc:3	missense	38	0.233129	16	C	T	T	-0.65687	37.9853	7.12779e-10	2L	7909376	Snoo	Snoo-in	intronic	42	0.264151	13	G	A	G
2R	3574626	CG1399	CG1399-in	intronic	64	0.410256	25	T	C	T	-0.74036	37.9827	7.13741e-10	3L	12224953	app	app-in	intronic	21	0.127273	18	G	A	G
3L	13893810	Rgl	-6181	intergenic	38	0.234568	17	T	C	C	0.68087	37.9772	7.15764e-10	3R	26130386	hdc	hdc-in	intronic	13	0.0928571	15	A	C	A
3L	13893810	CG13737	17674	intergenic	38	0.234568	17	T	C	C	0.68087	37.9772	7.15764e-10	3R	26130386	hdc	hdc-in	intronic	13	0.0928571	15	A	C	A
3L	13893810	CG34400	CG34400-in	intronic	38	0.234568	17	T	C	C	0.68087	37.9772	7.15764e-10	3R	26130386	hdc	hdc-in	intronic	13	0.0928571	15	A	C	A
3L	18615455	bora	-339	intergenic	51	0.31875	11	C	A	C	0.52219	37.9676	7.19296e-10	X	21932402	S6kII	S6kII-cds	missense	69	0.43125	8	T	A	T
3L	18615455	not	224	intergenic	51	0.31875	11	C	A	C	0.52219	37.9676	7.19296e-10	X	21932402	S6kII	S6kII-cds	missense	69	0.43125	8	T	A	T
3R	15322832	snoRNA:Me18S-A1374	-89086	intergenic	36	0.222222	12	T	C	T	0.66856	37.966	7.19867e-10	2R	1130856	Nipped-A	Nipped-A-in	intronic	50	0.318471	21	A	G	A
3R	15322832	CG15025	5995	intergenic	36	0.222222	12	T	C	T	0.66856	37.966	7.19867e-10	2R	1130856	Nipped-A	Nipped-A-in	intronic	50	0.318471	21	A	G	A
3R	15322832	Dys	Dys-in	intronic	36	0.222222	12	T	C	T	0.66856	37.966	7.19867e-10	2R	1130856	Nipped-A	Nipped-A-in	intronic	50	0.318471	21	A	G	A
2R	20210826	slbo	-8219	intergenic	34	0.209877	12	G	A	G	-0.5902	37.9647	7.20356e-10	3L	12580419	ara	ara-in	intronic	56	0.356688	6	T	C	T
2R	20210826	betaTub60D	10200	intergenic	34	0.209877	12	G	A	G	-0.5902	37.9647	7.20356e-10	3L	12580419	ara	ara-in	intronic	56	0.356688	6	T	C	T
X	8837885	CG10962	-29055	intergenic	45	0.271084	11	T	C	T	-0.6728	37.9571	7.23176e-10	3R	21812611	Nf1	Nf1:9	synonymous	37	0.229814	22	C	T	C
X	8837885	CG12661	20234	intergenic	45	0.271084	11	T	C	T	-0.6728	37.9571	7.23176e-10	3R	21812611	Nf1	Nf1:9	synonymous	37	0.229814	22	C	T	C
X	8837885	rdgA	rdgA-in	intronic	45	0.271084	11	T	C	T	-0.6728	37.9571	7.23176e-10	3R	21812611	Nf1	Nf1:9	synonymous	37	0.229814	22	C	T	C
3L	11665275	TfIIEalpha	-9851	intergenic	57	0.35625	10	A	T	A	0.59909	37.9539	7.24374e-10	3L	18169407	W	W-in	intronic	27	0.166667	19	G	A	G
3L	11665275	mir-274	15158	intergenic	57	0.35625	10	A	T	A	0.59909	37.9539	7.24374e-10	3L	18169407	W	W-in	intronic	27	0.166667	19	G	A	G
3L	11665275	CG32085	CG32085-in	intronic	57	0.35625	10	A	T	A	0.59909	37.9539	7.24374e-10	3L	18169407	W	W-in	intronic	27	0.166667	19	G	A	G
3R	26084915	hdc	-18741	intergenic	26	0.163522	18	T	G	T	0.64641	37.9507	7.25551e-10	X	4320416	bi	bi-in	intronic	40	0.258065	6	A	T	A
3R	26084915	CG18404	5096	intergenic	26	0.163522	18	T	G	T	0.64641	37.9507	7.25551e-10	X	4320416	bi	bi-in	intronic	40	0.258065	6	A	T	A
3L	590475	MED14	-2771	intergenic	50	0.304878	15	T	C	T	-0.4965	37.9469	7.26957e-10	X	4335829	bi	bi-in	intronic	74	0.443114	13	A	G	G
3L	590475	CG17181	1203	intergenic	50	0.304878	15	T	C	T	-0.4965	37.9469	7.26957e-10	X	4335829	bi	bi-in	intronic	74	0.443114	13	A	G	G
X	21991779	Cda4	Cda4-in	intronic	72	0.436364	8	G	A	G	-0.73496	37.941	7.29177e-10	3L	19916118	Su(z)12		UTR	16	0.101266	9	G	T	G
2R	13791546	PpY-55A	-51354	intergenic	21	0.127273	12	T	A	T	-0.76459	37.9222	7.36209e-10	2L	6422696	Tig	Tig-in	intronic	61	0.38125	18	C	T	C
2R	13791546	CG14491	8463	intergenic	21	0.127273	12	T	A	T	-0.76459	37.9222	7.36209e-10	2L	6422696	Tig	Tig-in	intronic	61	0.38125	18	C	T	C
2R	13791546	elk	elk-in	intronic	21	0.127273	12	T	A	T	-0.76459	37.9222	7.36209e-10	2L	6422696	Tig	Tig-in	intronic	61	0.38125	18	C	T	C
3L	19243107	mRpL21	-4227	intergenic	22	0.133333	17	T	C	T	0.74463	37.9189	7.37459e-10	3R	25300164	Ptp99A	Ptp99A-in	intronic	36	0.220859	8	C	A	C
3L	19243107	CG33647	12950	intergenic	22	0.133333	17	T	C	T	0.74463	37.9189	7.37459e-10	3R	25300164	Ptp99A	Ptp99A-in	intronic	36	0.220859	8	C	A	C
X	13976319	tRNA:S4:12Ee	-21077	intergenic	23	0.136905	12	A	G	A	0.79244	37.9151	7.38901e-10	3R	12127947	gish	gish-u3	UTR	75	0.483871	7	C	A	C
X	13976319	tRNA:S474:12Eh	11564	intergenic	23	0.136905	12	A	G	A	0.79244	37.9151	7.38901e-10	3R	12127947	gish	gish-u3	UTR	75	0.483871	7	C	A	C
3L	13583469	bru-3	bru-3-in	intronic	50	0.30303	12	A	C	A	0.56038	37.9135	7.39518e-10	3R	26171220	hdc	hdc-in	intronic	59	0.36875	15	A	G	G
3R	25104156	CG14506	-17306	intergenic	49	0.310127	15	C	G	C	0.51554	37.9099	7.40897e-10	3L	8448695	Gug	Gug-in	intronic	59	0.353293	11	A	T	A
3R	25104156	stg	22654	intergenic	49	0.310127	15	C	G	C	0.51554	37.9099	7.40897e-10	3L	8448695	Gug	Gug-in	intronic	59	0.353293	11	A	T	A
2R	12695755	CG5550	-8341	intergenic	58	0.374194	9	G	T	T	-0.50957	37.9096	7.41013e-10	3L	8832026	dally	dally-in	intronic	64	0.387879	15	A	G	G
2R	12695755	CG15615	11843	intergenic	58	0.374194	9	G	T	T	-0.50957	37.9096	7.41013e-10	3L	8832026	dally	dally-in	intronic	64	0.387879	15	A	G	G
2R	7415248	en	en-u5	UTR	37	0.226994	22	G	A	G	0.74845	37.9092	7.41135e-10	3L	3862535	Awh	838	intergenic	19	0.113772	13	G	A	G
3L	3862535	Fie	-30039	intergenic	19	0.113772	13	G	A	G	0.74845	37.9092	7.41135e-10	2R	7415248	en	en-u5	UTR	37	0.226994	22	G	A	G
3L	3862535	Awh	838	intergenic	19	0.113772	13	G	A	G	0.74845	37.9092	7.41135e-10	2R	7415248	en	en-u5	UTR	37	0.226994	22	G	A	G
3L	2180990	CG13810	-5007	intergenic	42	0.256098	10	G	C	G	0.69521	37.9064	7.42213e-10	2L	700189	ds	ds-in	intronic	24	0.147239	17	G	A	A
3L	2180990	CG13810	-5007	intergenic	42	0.256098	10	G	C	G	0.69521	37.9064	7.42213e-10	2L	700189	ds	ds-in	intronic	24	0.147239	17	G	A	A
3L	2180990	CG15820	6658	intergenic	42	0.256098	10	G	C	G	0.69521	37.9064	7.42213e-10	2L	700189	ds	ds-in	intronic	24	0.147239	17	G	A	A
3L	2180990	CG15820	6658	intergenic	42	0.256098	10	G	C	G	0.69521	37.9064	7.42213e-10	2L	700189	ds	ds-in	intronic	24	0.147239	17	G	A	A
X	13510582	Tango2	-443	intergenic	56	0.337349	11	C	A	A	0.56725	37.8883	7.49138e-10	3L	4157884	nab	nab-in	intronic	44	0.268293	9	T	G	G
X	13510582	tth	195	intergenic	56	0.337349	11	C	A	A	0.56725	37.8883	7.49138e-10	3L	4157884	nab	nab-in	intronic	44	0.268293	9	T	G	G
X	14517338	NetA	NetA-in	intronic	75	0.451807	14	A	G	G	0.63349	37.8871	7.49575e-10	2R	18262141	Rtf1	-456	intergenic	36	0.218182	12	A	T	A
2R	8187417	CG8850	CG8850-in	intronic	41	0.25	24	C	T	C	-0.56761	37.8869	7.49685e-10	X	13308960	Set2	Set2-in	synonymous	80	0.479042	16	A	C	C
3R	26967138	Gycbeta100B	Gycbeta100B-in	intronic	20	0.121951	19	G	A	G	-0.71459	37.8831	7.51146e-10	2R	15557760	hrg	434	intergenic	73	0.447853	12	A	T	T
X	17621030	CG42684	CG42684-in	intronic	74	0.445783	11	A	T	A	-0.59751	37.8815	7.51731e-10	3L	18169407	W	W-in	intronic	27	0.166667	19	G	A	G
3R	4545738	CG11760	CG11760-u3	UTR	67	0.416149	13	C	T	C	0.66676	37.8708	7.55876e-10	3L	10984845	klu	klu-in	intronic	31	0.186747	12	G	C	G
3R	4545738	CG8116	CG8116-u3	UTR	67	0.416149	13	C	T	C	0.66676	37.8708	7.55876e-10	3L	10984845	klu	klu-in	intronic	31	0.186747	12	G	C	G
2L	20142988	CG40341	-105235	intergenic	21	0.132911	17	G	A	G	-0.81955	37.87	7.56192e-10	3R	20129649	crb	crb-in	intronic	48	0.3	14	C	A	C
2L	20142988	CG10651	8065	intergenic	21	0.132911	17	G	A	G	-0.81955	37.87	7.56192e-10	3R	20129649	crb	crb-in	intronic	48	0.3	14	C	A	C
X	14456946	CG14414	-17695	intergenic	77	0.461078	14	A	G	A	0.46935	37.8666	7.5752e-10	X	15722546	Chc	Chc-in	intronic	65	0.389222	18	T	A	T
X	14456946	CG12540	65671	intergenic	77	0.461078	14	A	G	A	0.46935	37.8666	7.5752e-10	X	15722546	Chc	Chc-in	intronic	65	0.389222	18	T	A	T
3L	8534589	rhea	-3468	intergenic	25	0.150602	9	G	T	G	0.67242	37.8644	7.58363e-10	2R	7095814	shn	shn-cds	synonymous	75	0.465839	15	C	T	C
3L	8534589	ergic53	3471	intergenic	25	0.150602	9	G	T	G	0.67242	37.8644	7.58363e-10	2R	7095814	shn	shn-cds	synonymous	75	0.465839	15	C	T	C
3R	19697558	Pli	Pli-in	intronic	42	0.272727	9	G	T	T	-0.55092	37.8616	7.59449e-10	3L	12603298	caup	caup-u5	UTR	56	0.341463	17	T	G	T
3L	10953298	CG14147	-12456	intergenic	70	0.419162	13	A	G	G	-0.4868	37.8532	7.62722e-10	3L	9644155	fry	fry-in	synonymous	59	0.359756	13	T	C	C
3L	10953298	CG34050	15098	intergenic	70	0.419162	13	A	G	G	-0.4868	37.8532	7.62722e-10	3L	9644155	fry	fry-in	synonymous	59	0.359756	13	T	C	C
3L	948188	Glut1	Glut1-in	intronic	20	0.130719	12	A	G	A	0.57654	37.8463	7.65417e-10	X	4317149	bi	bi-in	intronic	45	0.271084	11	T	C	T
3L	18916454	CG32204	CG32204-u3	UTR	54	0.3375	11	G	A	G	-0.6868	37.8421	7.67076e-10	2L	298943	Pi3K21B	Pi3K21B-in	intronic	24	0.15	6	G	A	G
2R	6024529	gem	gem-u3	UTR	59	0.361963	21	T	G	G	-0.51305	37.8313	7.71355e-10	2R	11714462	Poxn	Poxn-u3	UTR	43	0.26875	18	A	G	G
2L	6247407	Ddr	-5716	intergenic	53	0.33758	14	C	T	C	-0.78726	37.8297	7.7197e-10	2R	18044252	a	a-in	intronic	18	0.109756	19	C	G	C
2L	6247407	Ugt37b1	20565	intergenic	53	0.33758	14	C	T	C	-0.78726	37.8297	7.7197e-10	2R	18044252	a	a-in	intronic	18	0.109756	19	C	G	C
3R	13582372	CG7431	CG7431-in	intronic	27	0.164634	13	G	T	G	0.65001	37.8286	7.72402e-10	2R	18059171	a	a:9	synonymous	69	0.425926	16	G	A	A
2R	11455238	Flo	Flo-in	intronic	27	0.164634	16	G	A	G	0.67237	37.8273	7.72928e-10	3R	27430189	CycG	CycG-in	intronic	65	0.411392	23	C	G	C
2R	11455238	Flo	Flo-in	intronic	27	0.164634	16	G	A	G	0.67237	37.8273	7.72928e-10	3R	27430189	CycG	CycG-in	intronic	65	0.411392	23	C	G	C
3L	7631191	CG33275	CG33275-in	intronic	77	0.463855	21	T	G	G	0.57021	37.8243	7.7412e-10	3L	14070581	btl	btl-in	intronic	33	0.20625	11	C	G	C
2L	892769	Lsp1beta	-5878	intergenic	27	0.162651	21	C	T	C	0.78869	37.8205	7.75641e-10	2R	6406490	lola	lola-u3	UTR	17	0.101796	15	G	C	G
2L	892769	Lsp1beta	-5878	intergenic	27	0.162651	21	C	T	C	0.78869	37.8205	7.75641e-10	2R	6406490	lola	lola-u3	UTR	17	0.101796	15	G	C	G
2L	892769	CG15824	7717	intergenic	27	0.162651	21	C	T	C	0.78869	37.8205	7.75641e-10	2R	6406490	lola	lola-u3	UTR	17	0.101796	15	G	C	G
2L	892769	CG15824	7717	intergenic	27	0.162651	21	C	T	C	0.78869	37.8205	7.75641e-10	2R	6406490	lola	lola-u3	UTR	17	0.101796	15	G	C	G
X	17573251	CG32556	CG32556-in	intronic	44	0.263473	10	C	A	C	-0.80226	37.8083	7.80504e-10	2R	18044252	a	a-in	intronic	18	0.109756	19	C	G	C
2L	8311892	CG7806	CG7806-cds	synonymous	23	0.138554	15	G	A	G	0.78596	37.7897	7.8795e-10	3L	8843581	dally	dally-in	intronic	68	0.43038	8	C	T	C
X	8088015	sdt	sdt-in	intronic	31	0.189024	9	T	C	T	0.59913	37.7884	7.88484e-10	3L	12222149	app	app-in	intronic	2	0.0185185	9	A	T	A
2R	15039797	ena	ena-in	intronic	72	0.441718	11	G	T	T	0.51208	37.7843	7.90171e-10	2L	2740160	Hrs	Hrs-u5	UTR	52	0.319018	14	G	A	G
X	21393197	CG14476	-78430	intergenic	62	0.380368	11	G	T	T	0.47169	37.7818	7.91176e-10	3R	6404811	hth	hth-in	intronic	59	0.364198	13	T	C	T
X	21393197	CG32822	140	intergenic	62	0.380368	11	G	T	T	0.47169	37.7818	7.91176e-10	3R	6404811	hth	hth-in	intronic	59	0.364198	13	T	C	T
3L	948188	Glut1	Glut1-in	intronic	20	0.130719	12	A	G	A	0.57128	37.7814	7.91347e-10	X	4317186	bi	bi-in	intronic	46	0.27381	13	A	T	A
3R	4854246	neur	neur-in	intronic	37	0.234177	15	G	A	A	-0.60398	37.7764	7.93366e-10	X	2586596	per	per-u3	UTR	43	0.259036	17	G	A	A
2L	8992438	CG9555	CG9555-in	intronic	69	0.436709	7	T	C	T	0.53988	37.7744	7.94186e-10	2L	5299650	vri	vri-u5	UTR	47	0.297468	13	T	C	T
2R	18328817	CG10384	-25177	intergenic	29	0.179012	17	C	G	C	-0.63887	37.7743	7.94203e-10	3R	26153367	hdc	hdc-in	intronic	51	0.31875	14	T	G	T
2R	18328817	ppk12	11728	intergenic	29	0.179012	17	C	G	C	-0.63887	37.7743	7.94203e-10	3R	26153367	hdc	hdc-in	intronic	51	0.31875	14	T	G	T
X	19368149	CG32533	-29	intergenic	40	0.238095	9	T	C	C	-0.56854	37.7631	7.98776e-10	3L	8858727	dally	dally-in	intronic	71	0.435583	18	A	T	A
X	19368149	kek5	4075	intergenic	40	0.238095	9	T	C	C	-0.56854	37.7631	7.98776e-10	3L	8858727	dally	dally-in	intronic	71	0.435583	18	A	T	A
2L	6247407	Ddr	-5716	intergenic	53	0.33758	14	C	T	C	-0.78395	37.758	8.00883e-10	2R	18044386	a	a-in	intronic	17	0.10303	17	A	T	A
2L	6247407	Ugt37b1	20565	intergenic	53	0.33758	14	C	T	C	-0.78395	37.758	8.00883e-10	2R	18044386	a	a-in	intronic	17	0.10303	17	A	T	A
X	11175151	CG34144	-16185	intergenic	47	0.291925	10	A	G	A	0.64214	37.7313	8.11918e-10	3L	10986094	klu	klu-in	intronic	34	0.204819	13	G	T	G
X	11175151	CG15198	32233	intergenic	47	0.291925	10	A	G	A	0.64214	37.7313	8.11918e-10	3L	10986094	klu	klu-in	intronic	34	0.204819	13	G	T	G
3R	26336065	PH4alphaNE2	PH4alphaNE2-in	intronic	73	0.447853	14	A	G	A	-0.49468	37.7153	8.1859e-10	2L	5265505	tkv	tkv-in	synonymous	66	0.4125	24	A	C	A
3R	12861078	CG4009	CG4009-cds	synonymous	20	0.122699	19	C	A	C	0.75718	37.7114	8.20261e-10	2R	9786470	shot	shot-in	intronic	72	0.444444	9	T	G	G
X	18732449	Pvf1	Pvf1-in	intronic	19	0.114458	7	G	T	G	-0.7148	37.7021	8.24162e-10	3R	17404796	InR	InR:9	synonymous	74	0.468354	19	T	C	T
X	18732449	Pvf1	Pvf1-in	intronic	19	0.114458	7	G	T	G	-0.7148	37.7021	8.24162e-10	3R	17404796	InR	InR:9	synonymous	74	0.468354	19	T	C	T
2R	13791546	PpY-55A	-51354	intergenic	21	0.127273	12	T	A	T	-0.6882	37.6854	8.31233e-10	3L	13269616	caps	caps-PB	synonymous	78	0.481481	15	C	T	C
2R	13791546	CG14491	8463	intergenic	21	0.127273	12	T	A	T	-0.6882	37.6854	8.31233e-10	3L	13269616	caps	caps-PB	synonymous	78	0.481481	15	C	T	C
2R	13791546	elk	elk-in	intronic	21	0.127273	12	T	A	T	-0.6882	37.6854	8.31233e-10	3L	13269616	caps	caps-PB	synonymous	78	0.481481	15	C	T	C
3L	21856572	CG7442	-71237	intergenic	38	0.233129	17	G	C	G	0.60388	37.6809	8.33178e-10	2L	8671152	Glt	-891	intergenic	52	0.329114	13	C	A	C
3L	21856572	tRNA:CR32449	9307	intergenic	38	0.233129	17	G	C	G	0.60388	37.6809	8.33178e-10	2L	8671152	Glt	-891	intergenic	52	0.329114	13	C	A	C
3L	21856572	mub	mub-in	intergenic	38	0.233129	17	G	C	G	0.60388	37.6809	8.33178e-10	2L	8671152	Glt	-891	intergenic	52	0.329114	13	C	A	C
3R	15161741	CG42793	-18032	intergenic	66	0.415094	10	C	A	C	-0.46771	37.6786	8.34161e-10	2R	9347253	arr	arr-in	intronic	75	0.46875	19	A	G	G
3R	15161741	mir-997	8851	intergenic	66	0.415094	10	C	A	C	-0.46771	37.6786	8.34161e-10	2R	9347253	arr	arr-in	intronic	75	0.46875	19	A	G	G
2L	10970933	YL-1	YL-1-in	intronic	55	0.357143	15	A	T	A	0.51043	37.664	8.40403e-10	3R	7464285	Csk	Csk-in	intronic	68	0.43038	15	T	C	C
2L	10970933	YL-1	YL-1-in	intronic	55	0.357143	15	A	T	A	0.51043	37.664	8.40403e-10	3R	7464285	Csk	Csk-in	intronic	68	0.43038	15	T	C	C
3R	26343029	jdp	jdp-u3	UTR	31	0.190184	14	T	C	T	-0.66626	37.6594	8.42409e-10	2R	3046413	pk	pk-in	intronic	41	0.251534	16	C	T	C
X	17970878	Dhc16F	Dhc16F:25	synonymous	34	0.202381	16	T	G	T	0.84087	37.6591	8.42504e-10	3R	7473277	Csk	Csk-in	intronic	27	0.171975	11	A	G	A
X	17970878	Dhc16F	Dhc16F:25	synonymous	34	0.202381	16	T	G	T	0.84087	37.6591	8.42504e-10	3R	7473277	Csk	Csk-in	intronic	27	0.171975	11	A	G	A
3L	19123491	fz2	-12507	intergenic	74	0.45679	17	C	T	C	-0.55366	37.6583	8.4289e-10	3R	23014876	Ser	Ser-in	intronic	48	0.301887	14	G	T	G
3L	19123491	Spn75F	726	intergenic	74	0.45679	17	C	T	C	-0.55366	37.6583	8.4289e-10	3R	23014876	Ser	Ser-in	intronic	48	0.301887	14	G	T	G
2R	12358365	CG15712	-13981	intergenic	77	0.472393	12	G	A	A	0.47142	37.6562	8.43775e-10	2R	7069922	shn	shn-in	intronic	74	0.48366	14	A	C	A
2R	12358365	CheB53b	1926	intergenic	77	0.472393	12	G	A	A	0.47142	37.6562	8.43775e-10	2R	7069922	shn	shn-in	intronic	74	0.48366	14	A	C	A
2R	18978032	CG9876	CG9876-PA	synonymous	61	0.38125	9	C	T	C	-0.70914	37.6529	8.45222e-10	2R	10420411	ttv	ttv-in	intronic	25	0.150602	11	A	G	A
3L	8534589	rhea	-3468	intergenic	25	0.150602	9	G	T	G	-0.67626	37.6524	8.45416e-10	2R	7095813	shn	shn-cds	missense	75	0.46875	15	C	T	C
3L	8534589	ergic53	3471	intergenic	25	0.150602	9	G	T	G	-0.67626	37.6524	8.45416e-10	2R	7095813	shn	shn-cds	missense	75	0.46875	15	C	T	C
3R	10055712	CG9616	-14814	intergenic	43	0.263804	14	G	A	G	-0.65232	37.6465	8.47974e-10	2R	15020143	botv	botv-cds	synonymous	35	0.212121	18	G	A	G
3R	10055712	CG9624	830	intergenic	43	0.263804	14	G	A	G	-0.65232	37.6465	8.47974e-10	2R	15020143	botv	botv-cds	synonymous	35	0.212121	18	G	A	G
X	21392764	CG32822	CG32822-u3	intergenic	56	0.335329	11	A	G	G	-0.54799	37.6431	8.49449e-10	3R	6390475	hth	hth-in	intronic	46	0.289308	17	T	A	A
2R	12373335	CG33458	-844	intergenic	67	0.411043	10	G	T	T	0.60317	37.6406	8.5057e-10	2R	18262141	Rtf1	-456	intergenic	36	0.218182	12	A	T	A
2R	12373335	CG15712	278	intergenic	67	0.411043	10	G	T	T	0.60317	37.6406	8.5057e-10	2R	18262141	Rtf1	-456	intergenic	36	0.218182	12	A	T	A
3R	11026954	CG42542	CG42542-in	missense	65	0.40625	15	C	A	A	0.56539	37.6289	8.55667e-10	2R	2008321	EcR	EcR-in	intronic	35	0.213415	20	G	T	G
3R	13712886	Rim	Rim-in	intronic	54	0.343949	13	G	T	T	-0.51356	37.6271	8.56452e-10	2R	16722315	insc	insc-in	intronic	76	0.463415	19	A	C	A
3R	26456507	CG31013	-12982	intergenic	27	0.161677	21	C	T	C	0.65471	37.6239	8.57887e-10	X	16524260	rok	rok:5	synonymous	81	0.48503	12	T	C	C
3R	26456507	CG2267	1757	intergenic	27	0.161677	21	C	T	C	0.65471	37.6239	8.57887e-10	X	16524260	rok	rok:5	synonymous	81	0.48503	12	T	C	C
X	12775592	CG32650	-15944	intergenic	49	0.302469	8	A	T	A	0.55387	37.6235	8.58041e-10	X	2415571	trol	trol:50	synonymous	53	0.341935	16	G	C	G
X	12775592	CG4661	23837	intergenic	49	0.302469	8	A	T	A	0.55387	37.6235	8.58041e-10	X	2415571	trol	trol:50	synonymous	53	0.341935	16	G	C	G
X	12775592	Pde9	Pde9-in	intergenic	49	0.302469	8	A	T	A	0.55387	37.6235	8.58041e-10	X	2415571	trol	trol:50	synonymous	53	0.341935	16	G	C	G
2R	18096486	CG3264	CG3264-u3	UTR	26	0.161491	17	A	C	A	0.68098	37.6147	8.61906e-10	2R	9756386	shot	shot-in	intronic	77	0.48125	11	G	A	A
2R	18158652	dve	dve-in	intronic	34	0.206061	21	C	T	T	0.60469	37.612	8.63142e-10	3R	2795101	Antp	Antp-in	intronic	42	0.270968	16	A	G	A
3R	2795101	Antp	Antp-in	intronic	42	0.270968	16	A	G	A	0.60469	37.612	8.63142e-10	2R	18158652	dve	dve-in	intronic	34	0.206061	21	C	T	T
2L	3226930	CG3347	-42507	intergenic	30	0.186335	11	A	G	A	0.74926	37.6108	8.63627e-10	2R	20231435	bs	bs-u5	UTR	44	0.266667	9	C	A	C
2L	3226930	CG34393	27310	intergenic	30	0.186335	11	A	G	A	0.74926	37.6108	8.63627e-10	2R	20231435	bs	bs-u5	UTR	44	0.266667	9	C	A	C
X	14517365	NetA	NetA-in	intronic	74	0.445783	13	T	G	G	0.64568	37.6093	8.64321e-10	2R	18262141	Rtf1	-456	intergenic	36	0.218182	12	A	T	A
2R	15557328	isopeptidase-T-3	-796	intergenic	75	0.454545	20	G	A	G	-0.53994	37.6087	8.6457e-10	3R	20123897	crb	crb-in	intronic	46	0.285714	19	C	G	C
2R	15557328	hrg	2	intergenic	75	0.454545	20	G	A	G	-0.53994	37.6087	8.6457e-10	3R	20123897	crb	crb-in	intronic	46	0.285714	19	C	G	C
3R	20123897	crb	crb-in	intronic	46	0.285714	19	C	G	C	-0.53994	37.6087	8.6457e-10	2R	15557328	hrg	2	intergenic	75	0.454545	20	G	A	G
3L	4613190	Src64B	Src64B-in	intronic	15	0.0925926	13	A	T	A	0.80687	37.6059	8.65829e-10	2R	13704783	grh	grh-in	intronic	49	0.30625	18	G	A	G
X	17806072	CG6847	CG6847-in	intronic	81	0.493902	7	A	T	A	-0.5672	37.6053	8.66101e-10	3R	20476743	ash2	ash2-in	intronic	33	0.20122	24	C	T	T
2R	6197343	CG12909	-286	intergenic	78	0.4875	12	G	A	A	-0.51732	37.5997	8.68598e-10	3R	26104488	hdc	hdc-u5	UTR	59	0.36646	12	A	C	C
2R	6197343	JhI-1	67	intergenic	78	0.4875	12	G	A	A	-0.51732	37.5997	8.68598e-10	3R	26104488	hdc	hdc-u5	UTR	59	0.36646	12	A	C	C
2L	1144314	CG4726	CG4726-in	intronic	49	0.308176	9	C	T	C	0.72115	37.5978	8.6944e-10	3R	12889308	Dad	Dad-in	intronic	24	0.147239	8	T	A	T
2R	19655444	CG9850	CG9850-in	intronic	24	0.143713	19	C	G	G	0.71968	37.5924	8.7184e-10	X	7962874	mys	mys-in	intronic	51	0.309091	16	A	C	A
3L	11101924	CG34012	CG34012-u3	intergenic	57	0.345455	16	G	A	G	0.48282	37.5903	8.72782e-10	3L	3361114	kst	kst:14	synonymous	60	0.359281	18	C	A	A
3R	15759139	mira	mira-cds	synonymous	55	0.352564	10	C	T	T	-0.54933	37.5898	8.7298e-10	2R	20249643	bs	bs-in	intronic	40	0.240964	21	G	T	G
3R	15759139	Hs6st	Hs6st-in	synonymous	55	0.352564	10	C	T	T	-0.54933	37.5898	8.7298e-10	2R	20249643	bs	bs-in	intronic	40	0.240964	21	G	T	G
2R	7515281	CG9005	CG9005-in	intronic	30	0.181818	12	C	T	T	-0.55896	37.5873	8.74121e-10	X	17215915	B-H2	B-H2-in	intronic	77	0.466667	10	A	T	T
2R	7515281	CG9005	CG9005-in	intronic	30	0.181818	12	C	T	T	-0.55896	37.5873	8.74121e-10	X	17215910	B-H2	B-H2-in	intronic	76	0.463415	10	A	C	C
X	21392768	CG32822	CG32822-u3	intergenic	56	0.335329	11	C	T	T	-0.54518	37.5861	8.74638e-10	3R	6390475	hth	hth-in	intronic	46	0.289308	17	T	A	A
X	22058518	CG12446	-152605	intergenic	20	0.11976	10	G	T	T	-0.8627	37.5832	8.7594e-10	2R	18027372	a	a-in	intronic	22	0.133333	15	T	C	C
X	22058518	Cda4	23973	intergenic	20	0.11976	10	G	T	T	-0.8627	37.5832	8.7594e-10	2R	18027372	a	a-in	intronic	22	0.133333	15	T	C	C
3L	6751401	CG32392	CG32392-in	intronic	35	0.284553	11	A	T	T	0.57775	37.5812	8.76849e-10	2L	4374910	Traf4	Traf4-in	intronic	80	0.5	11	T	C	T
2L	2818683	Duox	Duox:3	missense	41	0.254658	12	T	C	C	-0.53325	37.5683	8.82663e-10	2R	9839779	AGO1	AGO1-in	intronic	47	0.286585	10	A	T	A
3L	19243104	mRpL21	-4230	intergenic	22	0.134146	17	A	G	A	0.74339	37.5577	8.87495e-10	3R	25300164	Ptp99A	Ptp99A-in	intronic	36	0.220859	8	C	A	C
3L	19243104	CG33647	12947	intergenic	22	0.134146	17	A	G	A	0.74339	37.5577	8.87495e-10	3R	25300164	Ptp99A	Ptp99A-in	intronic	36	0.220859	8	C	A	C
3L	1423679	SA-2	-9404	intergenic	66	0.39759	14	A	G	A	-0.52528	37.5526	8.89824e-10	X	18200491	os	os-PB	synonymous	51	0.337748	5	G	C	G
3L	1423679	CG9173	208	intergenic	66	0.39759	14	A	G	A	-0.52528	37.5526	8.89824e-10	X	18200491	os	os-PB	synonymous	51	0.337748	5	G	C	G
3L	1423679	Ptp61F	Ptp61F-in	intronic	66	0.39759	14	A	G	A	-0.52528	37.5526	8.89824e-10	X	18200491	os	os-PB	synonymous	51	0.337748	5	G	C	G
3R	11352085	CG31296	-4117	intergenic	73	0.450617	12	T	G	G	0.51846	37.5416	8.9485e-10	2R	6397616	lola	lola:14	missense	51	0.310976	20	C	T	C
3R	11352085	CG31296	-4117	intergenic	73	0.450617	12	T	G	G	0.51846	37.5416	8.9485e-10	2R	6397616	lola	lola:14	missense	51	0.310976	20	C	T	C
3R	11352085	CG14872	16723	intergenic	73	0.450617	12	T	G	G	0.51846	37.5416	8.9485e-10	2R	6397616	lola	lola:14	missense	51	0.310976	20	C	T	C
3R	11352085	CG14872	16723	intergenic	73	0.450617	12	T	G	G	0.51846	37.5416	8.9485e-10	2R	6397616	lola	lola:14	missense	51	0.310976	20	C	T	C
3L	14091592	Sox21a	-4989	intergenic	44	0.269939	15	C	T	C	-0.53008	37.5378	8.96597e-10	2L	2927255	lilli	lilli-in	intronic	61	0.386076	16	T	A	A
3L	14091592	Fbp1	436	intergenic	44	0.269939	15	C	T	C	-0.53008	37.5378	8.96597e-10	2L	2927255	lilli	lilli-in	intronic	61	0.386076	16	T	A	A
3R	14876522	cdi	cdi-in	intronic	32	0.299065	18	T	A	T	-0.59874	37.5363	8.97257e-10	X	15510362	sog	sog-in	intronic	39	0.233533	12	A	C	A
2L	958355	ia2	-53066	intergenic	27	0.162651	17	A	G	A	0.70247	37.5358	8.97523e-10	3L	10982056	klu	klu-in	intronic	35	0.212121	13	C	G	C
2L	958355	CG4341	257	intergenic	27	0.162651	17	A	G	A	0.70247	37.5358	8.97523e-10	3L	10982056	klu	klu-in	intronic	35	0.212121	13	C	G	C
3L	10190775	ect	ect-in	intronic	77	0.469512	16	A	T	T	-0.51686	37.5325	8.9901e-10	2R	13661404	fab1	-65	intergenic	48	0.289157	16	T	C	T
X	13470513	Tango13	Tango13-in	intronic	57	0.354037	9	A	T	A	-0.53504	37.5322	8.99145e-10	3L	13267982	caps	caps-in	intronic	44	0.275	13	A	G	A
2L	19594998	Lar	-11571	intergenic	43	0.273885	13	T	A	A	-0.64303	37.5312	8.99622e-10	X	2586596	per	per-u3	UTR	43	0.259036	17	G	A	A
2L	19594998	CG10366	8558	intergenic	43	0.273885	13	T	A	A	-0.64303	37.5312	8.99622e-10	X	2586596	per	per-u3	UTR	43	0.259036	17	G	A	A
3R	12658327	iab-4	-17399	intergenic	80	0.5	9	A	T	A	-0.48819	37.5301	9.00121e-10	3R	15127491	Dl	-962	intergenic	65	0.401235	11	A	C	C
3R	12658327	abd-A	2558	intergenic	80	0.5	9	A	T	A	-0.48819	37.5301	9.00121e-10	3R	15127491	Dl	-962	intergenic	65	0.401235	11	A	C	C
X	21100138	tRNA:CR32518:Psi	-2214	intergenic	62	0.371257	11	A	G	A	0.55811	37.5254	9.02309e-10	3L	14350320	fz	fz-in	intronic	41	0.248485	21	G	A	A
X	21100138	CG32523	10276	intergenic	62	0.371257	11	A	G	A	0.55811	37.5254	9.02309e-10	3L	14350320	fz	fz-in	intronic	41	0.248485	21	G	A	A
X	21100138	CG32521	CG32521-in	intronic	62	0.371257	11	A	G	A	0.55811	37.5254	9.02309e-10	3L	14350320	fz	fz-in	intronic	41	0.248485	21	G	A	A
X	15684642	Rhp	Rhp-in	intronic	44	0.273292	5	G	A	G	0.59903	37.524	9.0295e-10	2L	4041032	ed	ed-in	intronic	50	0.314465	19	C	T	T
X	15684642	Rhp	Rhp-in	intronic	44	0.273292	5	G	A	G	0.59903	37.524	9.0295e-10	2L	4041032	ed	ed-in	intronic	50	0.314465	19	C	T	T
2R	20996148	CG30430	-20807	intergenic	75	0.454545	21	C	T	T	-0.47499	37.5202	9.04701e-10	3R	20476577	ash2	ash2:5	synonymous	69	0.428571	21	A	C	C
2R	20996148	CG16778	9460	intergenic	75	0.454545	21	C	T	T	-0.47499	37.5202	9.04701e-10	3R	20476577	ash2	ash2:5	synonymous	69	0.428571	21	A	C	C
2R	14748910	Jheh3	Jheh3:2	synonymous	73	0.445122	18	C	T	T	-0.62387	37.52	9.04781e-10	2R	13712142	grh	grh-in	intronic	39	0.237805	14	C	T	C
X	21101170	tRNA:CR32518:Psi	-1182	intergenic	51	0.31875	6	C	T	C	0.5449	37.5196	9.04992e-10	3L	14350320	fz	fz-in	intronic	41	0.248485	21	G	A	A
X	21101170	CG32523	11308	intergenic	51	0.31875	6	C	T	C	0.5449	37.5196	9.04992e-10	3L	14350320	fz	fz-in	intronic	41	0.248485	21	G	A	A
X	21101170	CG32521	CG32521-in	intronic	51	0.31875	6	C	T	C	0.5449	37.5196	9.04992e-10	3L	14350320	fz	fz-in	intronic	41	0.248485	21	G	A	A
X	22416429	CG13865	CG13865-cds	synonymous	76	0.460606	7	A	G	A	0.58938	37.5186	9.05461e-10	3L	5833358	vn	vn-in	intronic	34	0.203593	19	T	C	C
3L	10733106	CG12523	-61186	intergenic	49	0.310127	10	T	G	T	-0.49248	37.5168	9.06281e-10	X	13309089	Set2	Set2:3	synonymous	78	0.467066	17	T	C	T
3L	10733106	NijA	43132	intergenic	49	0.310127	10	T	G	T	-0.49248	37.5168	9.06281e-10	X	13309089	Set2	Set2:3	synonymous	78	0.467066	17	T	C	T
3L	2180990	CG13810	-5007	intergenic	42	0.256098	10	G	C	G	0.70408	37.5043	9.12114e-10	2L	700171	ds	ds-in	intronic	24	0.146341	20	C	A	A
3L	2180990	CG13810	-5007	intergenic	42	0.256098	10	G	C	G	0.70408	37.5043	9.12114e-10	2L	700171	ds	ds-in	intronic	24	0.146341	20	C	A	A
3L	2180990	CG15820	6658	intergenic	42	0.256098	10	G	C	G	0.70408	37.5043	9.12114e-10	2L	700171	ds	ds-in	intronic	24	0.146341	20	C	A	A
3L	2180990	CG15820	6658	intergenic	42	0.256098	10	G	C	G	0.70408	37.5043	9.12114e-10	2L	700171	ds	ds-in	intronic	24	0.146341	20	C	A	A
2R	20996148	CG30430	-20807	intergenic	75	0.454545	21	C	T	T	-0.4816	37.4979	9.15108e-10	3R	20476920	ash2	ash2-in	intronic	72	0.45	15	T	C	C
2R	20996148	CG16778	9460	intergenic	75	0.454545	21	C	T	T	-0.4816	37.4979	9.15108e-10	3R	20476920	ash2	ash2-in	intronic	72	0.45	15	T	C	C
3R	11024528	CG42542	CG42542-in	intronic	55	0.337423	22	C	T	T	0.57581	37.4964	9.15837e-10	2R	2008321	EcR	EcR-in	intronic	35	0.213415	20	G	T	G
3R	26216840	CG2217	-27649	intergenic	74	0.45122	15	A	T	A	0.52516	37.4877	9.19914e-10	3L	4158522	nab	nab-in	intronic	42	0.253012	16	T	G	T
3R	26216840	Fer2LCH	534	intergenic	74	0.45122	15	A	T	A	0.52516	37.4877	9.19914e-10	3L	4158522	nab	nab-in	intronic	42	0.253012	16	T	G	T
2R	18402061	px	px-in	intronic	76	0.463415	19	G	A	A	0.4745	37.4829	9.22175e-10	3L	8880023	dally	dally:4	synonymous	78	0.467066	17	T	C	T
3R	26728585	Ptx1	-10025	intergenic	46	0.282209	18	T	A	T	0.54818	37.4809	9.23124e-10	2L	7946809	Snoo	Snoo-in	intronic	68	0.433121	9	A	T	A
3R	26728585	CG33483	702	intergenic	46	0.282209	18	T	A	T	0.54818	37.4809	9.23124e-10	2L	7946809	Snoo	Snoo-in	intronic	68	0.433121	9	A	T	A
2R	10368512	L	-196	intergenic	16	0.0981595	14	T	C	T	0.72999	37.4681	9.29199e-10	3L	4234643	ImpL2	ImpL2-in	intronic	75	0.454545	16	A	G	G
2R	10368512	Oaz	15550	intergenic	16	0.0981595	14	T	C	T	0.72999	37.4681	9.29199e-10	3L	4234643	ImpL2	ImpL2-in	intronic	75	0.454545	16	A	G	G
2L	20384841	CG10947	-452	intergenic	38	0.234568	15	C	A	C	0.61056	37.4469	9.39372e-10	2L	3942231	fred	fred-in	intronic	45	0.288462	15	G	C	C
2L	20384841	CG16798	2486	intergenic	38	0.234568	15	C	A	C	0.61056	37.4469	9.39372e-10	2L	3942231	fred	fred-in	intronic	45	0.288462	15	G	C	C
3R	16141965	CG42668	CG42668-in	intergenic	43	0.267081	10	C	A	A	0.66922	37.446	9.39789e-10	2R	18053737	a	a-in	intronic	31	0.191358	14	G	A	G
3R	15758742	mira	mira-cds	missense	49	0.304348	14	G	A	A	-0.55703	37.4345	9.45364e-10	2R	20232460	bs	bs-in	intronic	44	0.263473	20	G	T	G
3R	15758742	Hs6st	Hs6st-in	missense	49	0.304348	14	G	A	A	-0.55703	37.4345	9.45364e-10	2R	20232460	bs	bs-in	intronic	44	0.263473	20	G	T	G
3R	26284009	CG2224	CG2224:2	missense	48	0.294479	9	T	C	C	0.64916	37.4211	9.51871e-10	3L	8857984	dally	dally-in	intronic	26	0.158537	9	G	C	C
2L	4861781	pog	pog-in	intronic	66	0.4125	15	A	C	A	-0.52516	37.4053	9.59636e-10	2R	9353509	arr	arr-in	intronic	45	0.276074	6	A	G	A
X	5548763	CG42265	CG42265:3	synonymous	49	0.293413	12	C	G	G	-0.67344	37.4011	9.6166e-10	2L	298943	Pi3K21B	Pi3K21B-in	intronic	24	0.15	6	G	A	G
3L	730092	CG13897	-7585	intergenic	19	0.115152	12	A	G	A	0.71432	37.4006	9.61933e-10	3L	16022517	Notum	Notum:1	synonymous	78	0.484472	15	G	T	G
3L	730092	CG13896	18242	intergenic	19	0.115152	12	A	G	A	0.71432	37.4006	9.61933e-10	3L	16022517	Notum	Notum:1	synonymous	78	0.484472	15	G	T	G
3R	23679944	CG12426	-17279	intergenic	80	0.5	11	T	C	C	-0.51864	37.3931	9.6562e-10	2R	10898927	hbs	hbs-u5	UTR	67	0.421384	15	T	C	C
3R	23679944	Or98a	6962	intergenic	80	0.5	11	T	C	C	-0.51864	37.3931	9.6562e-10	2R	10898927	hbs	hbs-u5	UTR	67	0.421384	15	T	C	C
3R	23679944	CG34353	CG34353-in	intergenic	80	0.5	11	T	C	C	-0.51864	37.3931	9.6562e-10	2R	10898927	hbs	hbs-u5	UTR	67	0.421384	15	T	C	C
3L	16812249	TSG101	-23150	intergenic	28	0.169697	20	G	A	G	0.63849	37.3892	9.67546e-10	2L	1060582	S	S-in	intronic	41	0.254658	12	A	G	A
3L	16812249	CG13024	8282	intergenic	28	0.169697	20	G	A	G	0.63849	37.3892	9.67546e-10	2L	1060582	S	S-in	intronic	41	0.254658	12	A	G	A
3L	16812249	nudC	nudC:4	synonymous	28	0.169697	20	G	A	G	0.63849	37.3892	9.67546e-10	2L	1060582	S	S-in	intronic	41	0.254658	12	A	G	A
3L	3269019	CG14960	-2019	intergenic	67	0.465278	5	A	C	A	0.54226	37.3855	9.6941e-10	2L	2907179	lilli	lilli-in	intronic	40	0.242424	16	A	G	A
3L	3269019	CG34265	25	intergenic	67	0.465278	5	A	C	A	0.54226	37.3855	9.6941e-10	2L	2907179	lilli	lilli-in	intronic	40	0.242424	16	A	G	A
3R	14319578	fru	fru-in	intronic	17	0.10241	14	G	A	G	0.75186	37.3816	9.7136e-10	2L	5229924	tkv	tkv-in	intronic	59	0.373418	15	C	T	C
X	17573251	CG32556	CG32556-in	intronic	44	0.263473	10	C	A	C	-0.79505	37.381	9.71643e-10	2R	18044386	a	a-in	intronic	17	0.10303	17	A	T	A
X	4302725	bi	-4164	intergenic	53	0.321212	14	C	A	A	0.65289	37.3732	9.75554e-10	2R	11714715	Poxn	Poxn-PA	synonymous	19	0.115854	14	C	G	G
X	4302725	CG32773	20441	intergenic	53	0.321212	14	C	A	A	0.65289	37.3732	9.75554e-10	2R	11714715	Poxn	Poxn-PA	synonymous	19	0.115854	14	C	G	G
2R	12373315	CG33458	-864	intergenic	69	0.423313	10	G	A	A	0.59926	37.3709	9.76684e-10	2R	18262141	Rtf1	-456	intergenic	36	0.218182	12	A	T	A
2R	12373315	CG15712	258	intergenic	69	0.423313	10	G	A	A	0.59926	37.3709	9.76684e-10	2R	18262141	Rtf1	-456	intergenic	36	0.218182	12	A	T	A
2L	4426567	CG34177	-7341	intergenic	53	0.33125	12	C	T	C	0.77753	37.3709	9.7669e-10	3L	12730661	Ptp69D	Ptp69D:3	synonymous	23	0.137725	20	T	C	T
2L	4426567	tRNA:CR31963	7519	intergenic	53	0.33125	12	C	T	C	0.77753	37.3709	9.7669e-10	3L	12730661	Ptp69D	Ptp69D:3	synonymous	23	0.137725	20	T	C	T
2L	4426567	CG15431	CG15431-in	intergenic	53	0.33125	12	C	T	C	0.77753	37.3709	9.7669e-10	3L	12730661	Ptp69D	Ptp69D:3	synonymous	23	0.137725	20	T	C	T
3L	1044930	bab1	bab1-in	intronic	65	0.389222	7	A	G	G	0.62994	37.37	9.77118e-10	X	12972784	hep	-456	intergenic	25	0.154321	6	C	T	C
2R	18280027	CG13506	CG13506-in	intronic	55	0.341615	19	A	G	G	-0.65079	37.3524	9.86003e-10	3R	13534435	osa	osa-in	intronic	32	0.195122	19	G	A	G
2R	12919884	RhoGEF2	RhoGEF2-in	intronic	41	0.248485	14	A	G	A	0.64816	37.3444	9.90068e-10	3R	27696397	heph	heph-in	intronic	38	0.2375	15	C	T	T
3R	11210732	CG6125	-17794	intergenic	77	0.475309	15	G	A	A	-0.47843	37.3398	9.92404e-10	3L	15972152	brm	brm-in	intronic	53	0.32716	17	C	G	G
3R	11210732	h-cup	2059	intergenic	77	0.475309	15	G	A	A	-0.47843	37.3398	9.92404e-10	3L	15972152	brm	brm-in	intronic	53	0.32716	17	C	G	G
3R	11210732	CG43073	CG43073-in	intronic	77	0.475309	15	G	A	A	-0.47843	37.3398	9.92404e-10	3L	15972152	brm	brm-in	intronic	53	0.32716	17	C	G	G
2R	18977933	CG9876	CG9876-PA	synonymous	37	0.226994	7	G	A	G	-0.58197	37.3344	9.95149e-10	3L	5806394	vn	-44	intergenic	59	0.355422	19	C	A	C
2L	20143058	CG40341	-105165	intergenic	22	0.138365	23	A	G	A	-0.8277	37.3335	9.95602e-10	3R	20129649	crb	crb-in	intronic	48	0.3	14	C	A	C
2L	20143058	CG10651	8135	intergenic	22	0.138365	23	A	G	A	-0.8277	37.3335	9.95602e-10	3R	20129649	crb	crb-in	intronic	48	0.3	14	C	A	C
2R	5721548	hebe	hebe-in	intronic	18	0.110429	21	C	T	C	0.78032	37.3268	9.9901e-10	2L	12459659	bun	bun-in	intronic	67	0.421384	11	A	T	T
2R	5721548	hebe	hebe-in	intronic	18	0.110429	21	C	T	C	0.78032	37.3268	9.9901e-10	2L	12459659	bun	bun-in	intronic	67	0.421384	11	A	T	T
3R	14876511	cdi	cdi-in	intronic	57	0.363057	16	A	T	A	0.56032	37.3259	9.99509e-10	X	15510362	sog	sog-in	intronic	39	0.233533	12	A	C	A

## Sheet: IODFIC
Chromosome X	Position X	Gene Symbol X	SNP Location X	Site Class X	Lines with minor allele X	MAF X	Mean Coverage X	Major Allele X	Minor Allele X	Reference SNP X	Beta	Chisquare	Pvalue	Chromosome Y	Position Y	Gene Symbol Y	SNP Location Y	Site Class Y	Lines with minor allele Y	MAF Y	Mean Coverage Y	Major Allele Y	Minor Allele Y	Reference SNP Y
X	21897553	l(1)G0196		synonymous	71	0.42515	20	C	T	T	0.55228	54.6217	1.46116e-13	3R	20131598	crb	crb-in	intronic	53	0.329193	15	C	A	A
3L	1358558	ru	-12062	intergenic	32	0.198758	19	C	T	C	0.79549	47.5724	5.30098e-12	3R	25298904	Ptp99A	Ptp99A:13	synonymous	32	0.195122	18	G	A	G
3L	1358558	312	5705	intergenic	32	0.198758	19	C	T	C	0.79549	47.5724	5.30098e-12	3R	25298904	Ptp99A	Ptp99A:13	synonymous	32	0.195122	18	G	A	G
3L	1358558	Ptp61F	Ptp61F-in	intronic	32	0.198758	19	C	T	C	0.79549	47.5724	5.30098e-12	3R	25298904	Ptp99A	Ptp99A:13	synonymous	32	0.195122	18	G	A	G
X	9174814	c11.1	c11.1:3	nonsense	33	0.196429	11	A	G	A	0.76629	47.4751	5.57068e-12	3R	21871353	gro	gro:12	synonymous	29	0.18239	10	C	T	C
X	9174987	c11.1	c11.1:3	missense	33	0.197605	14	A	C	A	0.75619	47.3978	5.79472e-12	3R	21871353	gro	gro:12	synonymous	29	0.18239	10	C	T	C
3L	18884833	CG11637	-650	intergenic	75	0.46875	12	A	G	A	-0.54476	47.2442	6.26718e-12	2L	10836029	Nos	Nos-in	intronic	56	0.352201	16	T	C	T
3L	18884833	CG3961	1251	intergenic	75	0.46875	12	A	G	A	-0.54476	47.2442	6.26718e-12	2L	10836029	Nos	Nos-in	intronic	56	0.352201	16	T	C	T
2L	2674354	CG31690	-471	intergenic	68	0.427673	19	G	T	G	-0.5389	46.5548	8.90918e-12	3R	27425755	CycG	CycG-in	intronic	53	0.348684	15	T	A	T
2L	2674354	CG31690	-471	intergenic	68	0.427673	19	G	T	G	-0.5389	46.5548	8.90918e-12	3R	27425755	CycG	CycG-in	intronic	53	0.348684	15	T	A	T
2L	2674354	Gr23a	2195	intergenic	68	0.427673	19	G	T	G	-0.5389	46.5548	8.90918e-12	3R	27425755	CycG	CycG-in	intronic	53	0.348684	15	T	A	T
2L	2674354	Gr23a	2195	intergenic	68	0.427673	19	G	T	G	-0.5389	46.5548	8.90918e-12	3R	27425755	CycG	CycG-in	intronic	53	0.348684	15	T	A	T
2R	14317054	CG12263	CG12263-in	intronic	75	0.465839	19	C	T	C	-0.59308	46.5437	8.95959e-12	2R	9366952	arr	arr-in	intronic	42	0.2625	11	T	G	T
3L	4695666	CG13713	-2013	intergenic	40	0.242424	12	T	A	A	0.72101	46.0289	1.16523e-11	3R	21871353	gro	gro:12	synonymous	29	0.18239	10	C	T	C
3L	4695666	CG15876	843	intergenic	40	0.242424	12	T	A	A	0.72101	46.0289	1.16523e-11	3R	21871353	gro	gro:12	synonymous	29	0.18239	10	C	T	C
3L	4695666	Gef64C	Gef64C-in	intronic	40	0.242424	12	T	A	A	0.72101	46.0289	1.16523e-11	3R	21871353	gro	gro:12	synonymous	29	0.18239	10	C	T	C
2R	16478336	bl	bl-in	intronic	61	0.378882	16	C	T	T	0.51893	46.025	1.16755e-11	3R	6374651	hth	hth-in	intronic	67	0.416149	8	C	A	A
3L	3581257	Eip63E	Eip63E-in	intronic	59	0.357576	12	G	C	G	0.56147	45.8509	1.27606e-11	3L	8837425	dally	dally-in	intronic	65	0.396341	16	T	C	T
2R	14628291	Hs3st-A	Hs3st-A-in	UTR	65	0.403727	15	T	C	C	0.57855	45.7517	1.34231e-11	3L	7528957	lqf	lqf-in	intronic	37	0.221557	17	C	T	C
2R	14628291	CG30121	CG30121-u5	UTR	65	0.403727	15	T	C	C	0.57855	45.7517	1.34231e-11	3L	7528957	lqf	lqf-in	intronic	37	0.221557	17	C	T	C
3R	2676945	ftz	-13101	intergenic	13	0.08125	7	A	C	A	0.84123	45.4499	1.56594e-11	3R	17874077	how	how-in	intronic	75	0.465839	18	T	C	T
3R	2676945	Scr	1242	intergenic	13	0.08125	7	A	C	A	0.84123	45.4499	1.56594e-11	3R	17874077	how	how-in	intronic	75	0.465839	18	T	C	T
3R	1747875	CG34113	CG34113-in	intronic	47	0.303226	13	G	T	G	-0.63465	45.411	1.59738e-11	3R	27428856	CycG	CycG-in	intronic	32	0.197531	19	T	C	T
3R	1747875	CG34113	CG34113-in	intronic	47	0.303226	13	G	T	G	-0.63465	45.411	1.59738e-11	3R	27428856	CycG	CycG-in	intronic	32	0.197531	19	T	C	T
3R	6950319	Ugt86Dd	-1997	intergenic	37	0.228395	9	G	C	C	0.77455	45.3989	1.60729e-11	3R	21871353	gro	gro:12	synonymous	29	0.18239	10	C	T	C
3R	6950319	CG6629	8891	intergenic	37	0.228395	9	G	C	C	0.77455	45.3989	1.60729e-11	3R	21871353	gro	gro:12	synonymous	29	0.18239	10	C	T	C
2R	4167090	mir-280	-18521	intergenic	44	0.273292	16	G	A	G	0.59273	45.0011	1.96923e-11	3L	4155383	nab	nab:5	synonymous	46	0.296774	7	G	T	G
2R	4167090	CG30371	10251	intergenic	44	0.273292	16	G	A	G	0.59273	45.0011	1.96923e-11	3L	4155383	nab	nab:5	synonymous	46	0.296774	7	G	T	G
2R	14806753	prod	-50157	intergenic	53	0.315476	12	A	G	A	-0.56804	44.6606	2.34329e-11	3L	7987660	nmo	nmo-in	intronic	49	0.308176	7	C	T	C
2R	14806753	Vha100-3	7534	intergenic	53	0.315476	12	A	G	A	-0.56804	44.6606	2.34329e-11	3L	7987660	nmo	nmo-in	intronic	49	0.308176	7	C	T	C
2R	14806753	sano	sano-in	intronic	53	0.315476	12	A	G	A	-0.56804	44.6606	2.34329e-11	3L	7987660	nmo	nmo-in	intronic	49	0.308176	7	C	T	C
3R	26722526	Cyp4c3	Cyp4c3-in	intronic	78	0.481481	17	A	T	A	-0.61549	44.6583	2.34606e-11	3L	10982553	klu	klu-in	intronic	32	0.191617	11	A	T	A
3R	12932887	cher	cher:15	synonymous	78	0.484472	17	A	T	A	0.5643	44.6394	2.3688e-11	2L	2902269	lilli	lilli-in	intronic	49	0.304348	16	C	A	C
2R	4167091	mir-280	-18520	intergenic	44	0.275	15	G	T	G	0.59387	44.5219	2.51525e-11	3L	4155383	nab	nab:5	synonymous	46	0.296774	7	G	T	G
2R	4167091	CG30371	10252	intergenic	44	0.275	15	G	T	G	0.59387	44.5219	2.51525e-11	3L	4155383	nab	nab:5	synonymous	46	0.296774	7	G	T	G
3L	18884833	CG11637	-650	intergenic	75	0.46875	12	A	G	A	-0.54072	44.5134	2.52618e-11	2L	10836030	Nos	Nos-in	intronic	56	0.35443	16	C	G	C
3L	18884833	CG3961	1251	intergenic	75	0.46875	12	A	G	A	-0.54072	44.5134	2.52618e-11	2L	10836030	Nos	Nos-in	intronic	56	0.35443	16	C	G	C
3L	7309172	CG8607	-3998	intergenic	54	0.3375	19	T	G	G	-0.57096	44.4877	2.55966e-11	2L	1694127	chinmo	chinmo-in	intronic	52	0.327044	13	A	G	G
3L	7309172	unc-13-4A	31035	intergenic	54	0.3375	19	T	G	G	-0.57096	44.4877	2.55966e-11	2L	1694127	chinmo	chinmo-in	intronic	52	0.327044	13	A	G	G
3R	17689050	lsn	-1872	intergenic	29	0.177914	17	C	A	C	-0.67876	44.4376	2.6259e-11	X	4360984	bi	bi-in	intronic	51	0.31875	6	A	G	A
3R	17689050	glec	7066	intergenic	29	0.177914	17	C	A	C	-0.67876	44.4376	2.6259e-11	X	4360984	bi	bi-in	intronic	51	0.31875	6	A	G	A
3L	7855439	Pdp1	Pdp1-in	intronic	38	0.230303	13	G	A	A	-0.67297	44.431	2.63484e-11	2R	17426933	Egfr	Egfr-in	intronic	44	0.271605	11	T	C	T
3L	7855439	Pdp1	Pdp1-in	intronic	38	0.230303	13	G	A	A	-0.67297	44.431	2.63484e-11	2R	17426933	Egfr	Egfr-in	intronic	44	0.271605	11	T	C	T
3L	2207961	CG15878	-2912	intergenic	9	0.0542169	14	T	A	A	0.71053	44.0231	3.24523e-11	3R	26616135	wts	wts-u3	UTR	57	0.349693	15	A	C	A
3L	2207961	CG15878	-2912	intergenic	9	0.0542169	14	T	A	A	0.71053	44.0231	3.24523e-11	3R	26616135	wts	wts-u3	UTR	57	0.349693	15	A	C	A
3L	2207961	CG8960	9854	intergenic	9	0.0542169	14	T	A	A	0.71053	44.0231	3.24523e-11	3R	26616135	wts	wts-u3	UTR	57	0.349693	15	A	C	A
3L	2207961	CG8960	9854	intergenic	9	0.0542169	14	T	A	A	0.71053	44.0231	3.24523e-11	3R	26616135	wts	wts-u3	UTR	57	0.349693	15	A	C	A
3L	3743861	CG32264	CG32264-in	intronic	43	0.265432	13	C	G	C	0.6382	43.7321	3.76542e-11	3R	10535264	kibra	kibra-in	intronic	37	0.229814	12	A	C	A
2R	19396282	CG3906	-2527	intergenic	57	0.354037	14	G	A	G	0.52974	43.6589	3.90897e-11	3L	14328681	fz	fz-in	intronic	72	0.441718	19	G	A	G
2R	19396282	CG13559	5085	intergenic	57	0.354037	14	G	A	G	0.52974	43.6589	3.90897e-11	3L	14328681	fz	fz-in	intronic	72	0.441718	19	G	A	G
2L	11020984	CG18666	-13865	intergenic	32	0.196319	15	A	G	G	0.72287	43.6241	3.97902e-11	2L	3938330	fred	fred-in	intronic	26	0.171053	7	T	A	T
2L	11020984	CG14913	2245	intergenic	32	0.196319	15	A	G	G	0.72287	43.6241	3.97902e-11	2L	3938330	fred	fred-in	intronic	26	0.171053	7	T	A	T
2L	11020984	Samuel	Samuel-in	intronic	32	0.196319	15	A	G	G	0.72287	43.6241	3.97902e-11	2L	3938330	fred	fred-in	intronic	26	0.171053	7	T	A	T
3L	20031691	sNPF-R	-21405	intergenic	55	0.34375	11	A	G	A	-0.6039	43.6103	4.00722e-11	3R	1357311	Itp-r83A	Itp-r83A-in	intronic	35	0.216049	17	A	C	A
3L	20031691	CG14184	9553	intergenic	55	0.34375	11	A	G	A	-0.6039	43.6103	4.00722e-11	3R	1357311	Itp-r83A	Itp-r83A-in	intronic	35	0.216049	17	A	C	A
X	6696929	C3G	C3G-in	intronic	66	0.4	12	T	G	T	-0.71307	43.6071	4.01388e-11	2L	14401260	elB	elB-in	intronic	23	0.144654	11	G	A	G
2R	18615457	jbug	jbug-in	intronic	45	0.290323	12	G	A	A	-0.5917	43.5899	4.04918e-11	X	3044515	N	N-in	intronic	64	0.383234	13	C	T	C
X	18627197	CG6873	-6052	intergenic	50	0.30303	16	T	C	C	-0.58474	43.5784	4.07316e-11	3R	25289851	Ptp99A	Ptp99A-in	intronic	80	0.496894	12	G	A	A
X	18627197	CG42302	7567	intergenic	50	0.30303	16	T	C	C	-0.58474	43.5784	4.07316e-11	3R	25289851	Ptp99A	Ptp99A-in	intronic	80	0.496894	12	G	A	A
3R	25403878	CG7567	-9081	intergenic	53	0.333333	20	T	A	A	0.55298	43.5568	4.11834e-11	2R	18156237	dve	dve-in	intronic	74	0.4625	16	A	T	T
3R	25403878	Dr	12871	intergenic	53	0.333333	20	T	A	A	0.55298	43.5568	4.11834e-11	2R	18156237	dve	dve-in	intronic	74	0.4625	16	A	T	T
2R	19497909	CG4019	CG4019-in	intronic	29	0.175758	19	T	C	T	-0.60644	43.4696	4.30606e-11	X	4313449	bi	bi-in	intronic	68	0.407186	13	C	T	T
3L	17763579	CG42815	-20677	intergenic	63	0.391304	11	A	C	C	0.57194	43.4675	4.31054e-11	2L	1060248	S	S-in	intronic	48	0.309677	22	A	G	A
3L	17763579	CG32181	7575	intergenic	63	0.391304	11	A	C	C	0.57194	43.4675	4.31054e-11	2L	1060248	S	S-in	intronic	48	0.309677	22	A	G	A
3L	14787358	CG9425	CG9425:3	missense	62	0.389937	20	T	A	T	-0.56282	43.3421	4.59596e-11	2L	15052309	ck	ck-in	intronic	44	0.280255	9	C	A	A
3L	9356456	Klp67A	Klp67A-in	intronic	21	0.126506	21	A	G	A	0.78856	43.2666	4.77676e-11	3R	21871353	gro	gro:12	synonymous	29	0.18239	10	C	T	C
X	5889283	CG4766	-2254	intergenic	72	0.433735	12	T	A	T	0.51713	43.1042	5.19009e-11	3R	9898199	foxo	foxo-in	intronic	61	0.396104	8	C	A	C
X	5889283	CG5966	2606	intergenic	72	0.433735	12	T	A	T	0.51713	43.1042	5.19009e-11	3R	9898199	foxo	foxo-in	intronic	61	0.396104	8	C	A	C
2L	6229575	Ddr	-23548	intergenic	21	0.128049	19	C	G	C	-0.8515	43.0624	5.30204e-11	3L	3342118	kst	kst-in	intronic	32	0.195122	17	G	A	G
2L	6229575	Ugt37b1	2733	intergenic	21	0.128049	19	C	G	C	-0.8515	43.0624	5.30204e-11	3L	3342118	kst	kst-in	intronic	32	0.195122	17	G	A	G
3R	1184510	Cerk	-75	intergenic	56	0.35443	12	T	G	T	0.66529	43.0269	5.39938e-11	2R	18164777	dve	dve-in	intronic	29	0.176829	15	T	G	G
3R	1184510	Prosbeta7	424	intergenic	56	0.35443	12	T	G	T	0.66529	43.0269	5.39938e-11	2R	18164777	dve	dve-in	intronic	29	0.176829	15	T	G	G
2R	5607065	CG42347	CG42347:4	synonymous	32	0.201258	16	T	A	T	0.78608	42.9796	5.53132e-11	2R	14166457	sbb	-113	intergenic	47	0.288344	13	T	C	C
X	14458343	CG14414	-16298	intergenic	44	0.271605	12	G	A	G	-0.52518	42.9648	5.57329e-11	X	7203682	brk	brk-PA	missense	82	0.488095	16	A	C	C
X	14458343	CG12540	67068	intergenic	44	0.271605	12	G	A	G	-0.52518	42.9648	5.57329e-11	X	7203682	brk	brk-PA	missense	82	0.488095	16	A	C	C
3L	6345433	CG42747	-48259	intergenic	67	0.41358	15	G	A	G	-0.52982	42.9209	5.69975e-11	2L	12470756	bun	bun-in	intronic	58	0.376623	19	G	T	G
3L	6345433	CG42747	-48259	intergenic	67	0.41358	15	G	A	G	-0.52982	42.9209	5.69975e-11	2L	12470756	bun	bun-in	intronic	58	0.376623	19	G	T	G
3L	6345433	Sfp65A	1504	intergenic	67	0.41358	15	G	A	G	-0.52982	42.9209	5.69975e-11	2L	12470756	bun	bun-in	intronic	58	0.376623	19	G	T	G
3L	6345433	Sfp65A	1504	intergenic	67	0.41358	15	G	A	G	-0.52982	42.9209	5.69975e-11	2L	12470756	bun	bun-in	intronic	58	0.376623	19	G	T	G
3L	6345433	CG13300	CG13300-u5	intergenic	67	0.41358	15	G	A	G	-0.52982	42.9209	5.69975e-11	2L	12470756	bun	bun-in	intronic	58	0.376623	19	G	T	G
3L	6345433	CG13300	CG13300-u5	intergenic	67	0.41358	15	G	A	G	-0.52982	42.9209	5.69975e-11	2L	12470756	bun	bun-in	intronic	58	0.376623	19	G	T	G
2L	6229575	Ddr	-23548	intergenic	21	0.128049	19	C	G	C	-0.84932	42.8634	5.86989e-11	3L	3342122	kst	kst-in	intronic	34	0.204819	16	G	A	G
2L	6229575	Ugt37b1	2733	intergenic	21	0.128049	19	C	G	C	-0.84932	42.8634	5.86989e-11	3L	3342122	kst	kst-in	intronic	34	0.204819	16	G	A	G
2R	18615457	jbug	jbug-in	intronic	45	0.290323	12	G	A	A	-0.59272	42.8474	5.91808e-11	X	3044517	N	N-in	intronic	63	0.379518	13	A	T	A
X	9175015	c11.1	c11.1:3	missense	33	0.196429	13	C	T	C	0.741	42.8369	5.94991e-11	3R	21871353	gro	gro:12	synonymous	29	0.18239	10	C	T	C
X	6696929	C3G	C3G-in	intronic	66	0.4	12	T	G	T	-0.75416	42.8092	6.0347e-11	2L	14401341	elB	elB-in	intronic	17	0.103659	8	T	G	T
3L	8894167	TrpA1	TrpA1-in	intronic	67	0.41358	9	T	C	T	0.71311	42.777	6.13486e-11	2L	14401260	elB	elB-in	intronic	23	0.144654	11	G	A	G
3R	19704147	Pli	Pli-in	intronic	32	0.193939	13	G	C	C	0.65927	42.7118	6.34282e-11	3L	8672463	h	124	intergenic	74	0.45122	12	A	C	C
X	9174775	c11.1	c11.1:3	synonymous	33	0.197605	15	G	C	G	0.74134	42.6823	6.43912e-11	3R	21871353	gro	gro:12	synonymous	29	0.18239	10	C	T	C
2L	2674361	CG31690	-464	intergenic	75	0.483871	18	T	G	T	0.51284	42.6744	6.46525e-11	3R	27425755	CycG	CycG-in	intronic	53	0.348684	15	T	A	T
2L	2674361	CG31690	-464	intergenic	75	0.483871	18	T	G	T	0.51284	42.6744	6.46525e-11	3R	27425755	CycG	CycG-in	intronic	53	0.348684	15	T	A	T
2L	2674361	Gr23a	2202	intergenic	75	0.483871	18	T	G	T	0.51284	42.6744	6.46525e-11	3R	27425755	CycG	CycG-in	intronic	53	0.348684	15	T	A	T
2L	2674361	Gr23a	2202	intergenic	75	0.483871	18	T	G	T	0.51284	42.6744	6.46525e-11	3R	27425755	CycG	CycG-in	intronic	53	0.348684	15	T	A	T
X	9174598	c11.1	c11.1:3	synonymous	31	0.184524	16	T	A	T	0.7398	42.5188	7.00055e-11	3R	21871353	gro	gro:12	synonymous	29	0.18239	10	C	T	C
3R	17204962	tin	tin-u5	UTR	40	0.246914	24	A	T	A	0.60526	42.5145	7.01585e-11	3L	8030309	nmo	nmo-in	intronic	68	0.427673	11	C	A	A
3L	7309172	CG8607	-3998	intergenic	54	0.3375	19	T	G	G	-0.57312	42.5076	7.04093e-11	2L	1694094	chinmo	chinmo-in	intronic	54	0.341772	13	G	A	A
3L	7309172	unc-13-4A	31035	intergenic	54	0.3375	19	T	G	G	-0.57312	42.5076	7.04093e-11	2L	1694094	chinmo	chinmo-in	intronic	54	0.341772	13	G	A	A
2L	10512773	Fatp	Fatp:2	synonymous	23	0.14375	21	G	A	G	-0.82372	42.5065	7.04494e-11	3L	5822054	vn	vn-in	intronic	64	0.385542	13	A	T	T
3R	22473801	beat-VII	-552	intergenic	59	0.36875	13	A	G	A	-0.67468	42.4997	7.06926e-11	2L	4100149	ed	ed-in	intronic	32	0.196319	17	T	C	T
3R	22473801	beat-VII	-552	intergenic	59	0.36875	13	A	G	A	-0.67468	42.4997	7.06926e-11	2L	4100149	ed	ed-in	intronic	32	0.196319	17	T	C	T
3R	22473801	TwdlD	7022	intergenic	59	0.36875	13	A	G	A	-0.67468	42.4997	7.06926e-11	2L	4100149	ed	ed-in	intronic	32	0.196319	17	T	C	T
3R	22473801	TwdlD	7022	intergenic	59	0.36875	13	A	G	A	-0.67468	42.4997	7.06926e-11	2L	4100149	ed	ed-in	intronic	32	0.196319	17	T	C	T
3L	16502776	CG12436	-19831	intergenic	50	0.310559	11	C	T	C	0.63171	42.4904	7.10314e-11	2L	10820526	Nos	Nos-in	intronic	49	0.304348	13	A	C	C
3L	16502776	st	9213	intergenic	50	0.310559	11	C	T	C	0.63171	42.4904	7.10314e-11	2L	10820526	Nos	Nos-in	intronic	49	0.304348	13	A	C	C
3L	16502776	CG42513	CG42513-in	intronic	50	0.310559	11	C	T	C	0.63171	42.4904	7.10314e-11	2L	10820526	Nos	Nos-in	intronic	49	0.304348	13	A	C	C
3L	12526394	Tsf2	Tsf2:2	missense	71	0.427711	22	G	A	A	0.50889	42.4875	7.11338e-11	X	2390123	trol	trol-in	intronic	53	0.317365	17	A	G	A
3L	7855439	Pdp1	Pdp1-in	intronic	38	0.230303	13	G	A	A	-0.66118	42.4468	7.26306e-11	2R	17426927	Egfr	Egfr-in	intronic	42	0.264151	11	C	T	C
3L	7855439	Pdp1	Pdp1-in	intronic	38	0.230303	13	G	A	A	-0.66118	42.4468	7.26306e-11	2R	17426927	Egfr	Egfr-in	intronic	42	0.264151	11	C	T	C
3L	20031655	sNPF-R	-21441	intergenic	54	0.339623	12	T	C	T	-0.59944	42.4115	7.39529e-11	3R	1357311	Itp-r83A	Itp-r83A-in	intronic	35	0.216049	17	A	C	A
3L	20031655	CG14184	9517	intergenic	54	0.339623	12	T	C	T	-0.59944	42.4115	7.39529e-11	3R	1357311	Itp-r83A	Itp-r83A-in	intronic	35	0.216049	17	A	C	A
3R	26722383	Cyp4c3	Cyp4c3-in	intronic	65	0.40625	19	T	C	T	-0.61716	42.4099	7.4015e-11	3L	10982553	klu	klu-in	intronic	32	0.191617	11	A	T	A
3L	16502766	CG12436	-19841	intergenic	50	0.308642	10	C	A	C	0.62377	42.2848	7.89037e-11	2L	10820526	Nos	Nos-in	intronic	49	0.304348	13	A	C	C
3L	16502766	st	9203	intergenic	50	0.308642	10	C	A	C	0.62377	42.2848	7.89037e-11	2L	10820526	Nos	Nos-in	intronic	49	0.304348	13	A	C	C
3L	16502766	CG42513	CG42513-in	intronic	50	0.308642	10	C	A	C	0.62377	42.2848	7.89037e-11	2L	10820526	Nos	Nos-in	intronic	49	0.304348	13	A	C	C
3R	19640003	CG33111	CG33111-in	synonymous	24	0.144578	17	C	T	C	0.81206	42.2376	8.08314e-11	2R	18141289	dve	dve-in	intronic	17	0.103659	18	C	T	C
3R	19640003	eIF4G2	eIF4G2-cds	synonymous	24	0.144578	17	C	T	C	0.81206	42.2376	8.08314e-11	2R	18141289	dve	dve-in	intronic	17	0.103659	18	C	T	C
X	5473781	Vsx1	-14525	intergenic	64	0.383234	10	G	A	A	0.50719	42.2191	8.15975e-11	2L	4367939	Traf4	Traf4-in	intronic	74	0.465409	15	C	T	C
X	5473781	Vsx2	19565	intergenic	64	0.383234	10	G	A	A	0.50719	42.2191	8.15975e-11	2L	4367939	Traf4	Traf4-in	intronic	74	0.465409	15	C	T	C
2L	12270294	CG31862	-68576	intergenic	38	0.242038	14	G	T	G	0.57937	42.2024	8.23004e-11	2L	2366059	Axud1	Axud1-in	intronic	58	0.417266	5	T	G	G
2L	12270294	CG31759	60184	intergenic	38	0.242038	14	G	T	G	0.57937	42.2024	8.23004e-11	2L	2366059	Axud1	Axud1-in	intronic	58	0.417266	5	T	G	G
2L	12270294	aret	aret-in	intronic	38	0.242038	14	G	T	G	0.57937	42.2024	8.23004e-11	2L	2366059	Axud1	Axud1-in	intronic	58	0.417266	5	T	G	G
2R	13552926	eIF3-S8	-257	intergenic	73	0.447853	14	G	T	G	-0.57106	42.1831	8.31151e-11	2L	686238	ds	ds-in	intronic	43	0.267081	19	T	C	T
2R	13552926	eIF3-S8	-257	intergenic	73	0.447853	14	G	T	G	-0.57106	42.1831	8.31151e-11	2L	686238	ds	ds-in	intronic	43	0.267081	19	T	C	T
2R	13552926	CG30106	11125	intergenic	73	0.447853	14	G	T	G	-0.57106	42.1831	8.31151e-11	2L	686238	ds	ds-in	intronic	43	0.267081	19	T	C	T
2R	13552926	CG30106	11125	intergenic	73	0.447853	14	G	T	G	-0.57106	42.1831	8.31151e-11	2L	686238	ds	ds-in	intronic	43	0.267081	19	T	C	T
3R	26707324	CG15547	-190	intergenic	45	0.28125	16	G	A	G	-0.61232	42.1712	8.36228e-11	3R	22996965	Ser	-853	intergenic	43	0.262195	10	A	G	G
3R	26707324	CG12071	727	intergenic	45	0.28125	16	G	A	G	-0.61232	42.1712	8.36228e-11	3R	22996965	Ser	-853	intergenic	43	0.262195	10	A	G	G
3R	22473800	beat-VII	-553	intergenic	55	0.352564	13	G	T	G	-0.67233	42.015	9.05779e-11	2L	4100149	ed	ed-in	intronic	32	0.196319	17	T	C	T
3R	22473800	beat-VII	-553	intergenic	55	0.352564	13	G	T	G	-0.67233	42.015	9.05779e-11	2L	4100149	ed	ed-in	intronic	32	0.196319	17	T	C	T
3R	22473800	TwdlD	7021	intergenic	55	0.352564	13	G	T	G	-0.67233	42.015	9.05779e-11	2L	4100149	ed	ed-in	intronic	32	0.196319	17	T	C	T
3R	22473800	TwdlD	7021	intergenic	55	0.352564	13	G	T	G	-0.67233	42.015	9.05779e-11	2L	4100149	ed	ed-in	intronic	32	0.196319	17	T	C	T
3R	2676945	ftz	-13101	intergenic	13	0.08125	7	A	C	A	0.77944	41.9942	9.15464e-11	3R	17874209	how	how-in	intronic	65	0.403727	15	G	A	G
3R	2676945	Scr	1242	intergenic	13	0.08125	7	A	C	A	0.77944	41.9942	9.15464e-11	3R	17874209	how	how-in	intronic	65	0.403727	15	G	A	G
2L	19918746	CG10664	-39961	intergenic	33	0.20625	19	C	T	C	-0.75799	41.99	9.17406e-11	2L	5310704	vri	vri-u3	UTR	23	0.144654	11	C	T	T
2L	19918746	Victoria	5230	intergenic	33	0.20625	19	C	T	C	-0.75799	41.99	9.17406e-11	2L	5310704	vri	vri-u3	UTR	23	0.144654	11	C	T	T
2L	19918746	sick	sick-in	intronic	33	0.20625	19	C	T	C	-0.75799	41.99	9.17406e-11	2L	5310704	vri	vri-u3	UTR	23	0.144654	11	C	T	T
X	9174765	c11.1	c11.1:3	missense	33	0.197605	17	A	G	A	0.74183	41.9285	9.46724e-11	3R	21871353	gro	gro:12	synonymous	29	0.18239	10	C	T	C
2L	1575791	haf	haf-in	intronic	66	0.415094	15	G	C	G	-0.52913	41.9116	9.54956e-11	X	4362444	bi	bi-in	intronic	54	0.321429	12	G	C	C
3L	12526379	Tsf2	Tsf2:2	synonymous	70	0.421687	20	C	T	T	0.51244	41.8513	9.84834e-11	X	2390123	trol	trol-in	intronic	53	0.317365	17	A	G	A
2L	9032261	CG31708	-19370	intergenic	74	0.468354	15	G	T	T	-0.58308	41.8364	9.92379e-11	2R	13697556	grh	grh-in	intronic	44	0.266667	17	C	T	C
2L	9032261	CG9582	6857	intergenic	74	0.468354	15	G	T	T	-0.58308	41.8364	9.92379e-11	2R	13697556	grh	grh-in	intronic	44	0.266667	17	C	T	C
3R	9114207	CG15887	CG15887-in	intronic	47	0.291925	15	A	G	A	0.65954	41.8342	9.93518e-11	3R	20478904	ash2	ash2-cds	synonymous	32	0.198758	20	T	C	T
3R	21905894	dys	dys-in	intronic	61	0.391026	9	G	C	C	0.68193	41.8291	9.96109e-11	3L	4155632	nab	nab:5	synonymous	28	0.178344	8	C	T	C
3L	8894171	TrpA1	TrpA1-in	intronic	67	0.411043	9	A	G	A	0.68354	41.7761	1.02347e-10	2L	14401260	elB	elB-in	intronic	23	0.144654	11	G	A	G
2R	6884290	luna	luna-in	intronic	24	0.148148	16	A	G	A	0.73366	41.6721	1.07939e-10	3L	12219223	app	app-in	intronic	54	0.329268	11	T	A	A
3L	4603165	Src64B	Src64B-in	intronic	44	0.266667	9	G	A	G	0.5608	41.6345	1.10032e-10	2R	12912145	Ark	Ark:9	synonymous	58	0.358025	23	C	A	A
2R	13382758	CG30103	CG30103-cds	synonymous	65	0.403727	15	G	C	C	-0.52096	41.6311	1.10223e-10	2L	2740775	Hrs	Hrs:5	synonymous	59	0.373418	18	G	A	G
2R	14628287	CG30121	CG30121-u5	UTR	66	0.407407	13	T	C	C	0.56244	41.5959	1.12228e-10	3L	7528957	lqf	lqf-in	intronic	37	0.221557	17	C	T	C
2R	14628287	Hs3st-A	Hs3st-A-in	UTR	66	0.407407	13	T	C	C	0.56244	41.5959	1.12228e-10	3L	7528957	lqf	lqf-in	intronic	37	0.221557	17	C	T	C
3L	19861015	Rab8	Rab8-u3	UTR	26	0.158537	14	G	C	G	-0.73185	41.5918	1.12466e-10	2R	17439044	Egfr	Egfr-in	intronic	71	0.452229	16	A	T	T
3L	19861015	Rab8	Rab8-u3	UTR	26	0.158537	14	G	C	G	-0.73185	41.5918	1.12466e-10	2R	17439044	Egfr	Egfr-in	intronic	71	0.452229	16	A	T	T
2L	8327634	CG14275	CG14275-in	intronic	48	0.307692	7	A	G	A	0.64258	41.5693	1.13768e-10	3L	7989817	nmo	nmo-in	intronic	42	0.251497	13	C	G	C
3R	23286669	CG13978	-3242	intergenic	67	0.41875	19	C	T	T	-0.55258	41.5645	1.14043e-10	2R	20887461	zip	zip-in	intronic	46	0.278788	16	A	G	G
3R	23286669	side	42422	intergenic	67	0.41875	19	C	T	T	-0.55258	41.5645	1.14043e-10	2R	20887461	zip	zip-in	intronic	46	0.278788	16	A	G	G
3R	26024409	CG9743	CG9743-cds	missense	29	0.172619	16	G	A	G	0.7252	41.5569	1.14491e-10	2L	2167526	aop	aop-in	intronic	72	0.45	23	T	A	T
2L	11021001	CG18666	-13848	intergenic	33	0.20625	14	T	C	C	0.71015	41.552	1.14775e-10	2L	3938330	fred	fred-in	intronic	26	0.171053	7	T	A	T
2L	11021001	CG14913	2262	intergenic	33	0.20625	14	T	C	C	0.71015	41.552	1.14775e-10	2L	3938330	fred	fred-in	intronic	26	0.171053	7	T	A	T
2L	11021001	Samuel	Samuel-in	intronic	33	0.20625	14	T	C	C	0.71015	41.552	1.14775e-10	2L	3938330	fred	fred-in	intronic	26	0.171053	7	T	A	T
2R	18615473	jbug	jbug-in	intronic	48	0.305732	8	T	G	G	-0.56593	41.5297	1.16091e-10	X	3044515	N	N-in	intronic	64	0.383234	13	C	T	C
2L	12270294	CG31862	-68576	intergenic	38	0.242038	14	G	T	G	0.57352	41.5221	1.16544e-10	2L	2365925	Axud1	Axud1-in	intronic	58	0.369427	16	T	G	G
2L	12270294	CG31759	60184	intergenic	38	0.242038	14	G	T	G	0.57352	41.5221	1.16544e-10	2L	2365925	Axud1	Axud1-in	intronic	58	0.369427	16	T	G	G
2L	12270294	aret	aret-in	intronic	38	0.242038	14	G	T	G	0.57352	41.5221	1.16544e-10	2L	2365925	Axud1	Axud1-in	intronic	58	0.369427	16	T	G	G
2R	12120780	CG15701	CG15701-cds	synonymous	47	0.291925	19	C	T	C	0.61681	41.4978	1.18004e-10	3L	12205769	app	app:3	nonsense	36	0.218182	13	A	G	G
3R	13691933	tinc	tinc-in	intronic	32	0.193939	15	G	A	G	0.69277	41.4863	1.18697e-10	3L	12212594	app	app-in	intronic	70	0.419162	22	A	G	G
3R	13691939	tinc	tinc-in	intronic	31	0.189024	13	G	A	G	0.69277	41.4863	1.18697e-10	3L	12212594	app	app-in	intronic	70	0.419162	22	A	G	G
3R	13691945	tinc	tinc-in	intronic	31	0.189024	13	C	T	C	0.69277	41.4863	1.18697e-10	3L	12212594	app	app-in	intronic	70	0.419162	22	A	G	G
X	12621726	CG4004	-16773	intergenic	68	0.412121	9	T	G	T	-0.48177	41.4597	1.20324e-10	2R	9811915	shot	shot-in	intronic	72	0.439024	8	A	G	A
X	12621726	CG15725	19123	intergenic	68	0.412121	9	T	G	T	-0.48177	41.4597	1.20324e-10	2R	9811915	shot	shot-in	intronic	72	0.439024	8	A	G	A
X	12621726	Smr	Smr-in	intronic	68	0.412121	9	T	G	T	-0.48177	41.4597	1.20324e-10	2R	9811915	shot	shot-in	intronic	72	0.439024	8	A	G	A
2R	10629245	CG12858	CG12858:4	synonymous	28	0.175	17	T	C	T	-0.63945	41.4152	1.23094e-10	3L	17353640	tap	tap-PA	missense	69	0.420732	19	T	A	T
X	8829851	CG10962	-37089	intergenic	59	0.359756	10	C	T	C	0.77541	41.3922	1.24555e-10	2L	14401341	elB	elB-in	intronic	17	0.103659	8	T	G	T
X	8829851	CG12661	12200	intergenic	59	0.359756	10	C	T	C	0.77541	41.3922	1.24555e-10	2L	14401341	elB	elB-in	intronic	17	0.103659	8	T	G	T
X	8829851	rdgA	rdgA-in	intronic	59	0.359756	10	C	T	C	0.77541	41.3922	1.24555e-10	2L	14401341	elB	elB-in	intronic	17	0.103659	8	T	G	T
2R	6884290	luna	luna-in	intronic	24	0.148148	16	A	G	A	0.72158	41.3912	1.24615e-10	3L	12219267	app	app-in	intronic	56	0.337349	11	C	T	T
3L	14787358	CG9425	CG9425:3	missense	62	0.389937	20	T	A	T	-0.5549	41.3814	1.25242e-10	2L	15052303	ck	ck-in	intronic	45	0.28481	9	G	A	A
2L	8327637	CG14275	CG14275-in	intronic	48	0.307692	7	T	A	T	0.64506	41.3199	1.29245e-10	3L	7989817	nmo	nmo-in	intronic	42	0.251497	13	C	G	C
2R	4167094	mir-280	-18517	intergenic	44	0.273292	15	G	C	G	0.5843	41.3095	1.29937e-10	3L	4155383	nab	nab:5	synonymous	46	0.296774	7	G	T	G
2R	4167094	CG30371	10255	intergenic	44	0.273292	15	G	C	G	0.5843	41.3095	1.29937e-10	3L	4155383	nab	nab:5	synonymous	46	0.296774	7	G	T	G
3R	15105781	Dl	-22672	intergenic	53	0.32716	14	G	A	G	-0.54469	41.285	1.31574e-10	2L	14396573	elB	elB-in	intronic	57	0.372549	17	A	T	T
3R	15105781	CG14280	20177	intergenic	53	0.32716	14	G	A	G	-0.54469	41.285	1.31574e-10	2L	14396573	elB	elB-in	intronic	57	0.372549	17	A	T	T
2R	8573989	CG13148	-125	intergenic	52	0.33121	14	A	T	A	-0.60961	41.2764	1.32157e-10	3R	27810965	heph	heph-u5	UTR	38	0.234568	17	G	T	G
2R	8573989	CG8771	319	intergenic	52	0.33121	14	A	T	A	-0.60961	41.2764	1.32157e-10	3R	27810965	heph	heph-u5	UTR	38	0.234568	17	G	T	G
2R	3553938	CG2064	CG2064-in	intronic	39	0.24375	20	T	C	T	0.57417	41.2364	1.34889e-10	2L	11241476	ab	ab-in	intronic	48	0.301887	16	A	G	G
2R	15069183	hppy	hppy-in	intronic	71	0.438272	14	C	A	A	0.53337	41.1897	1.3815e-10	2R	4845111	babo	babo-in	intronic	50	0.306748	13	G	T	T
2R	15069183	hppy	hppy-in	intronic	71	0.438272	14	C	A	A	0.53337	41.1897	1.3815e-10	2R	4845111	babo	babo-in	intronic	50	0.306748	13	G	T	T
2R	16478284	bl	bl-in	intronic	48	0.3	15	A	T	T	0.53657	41.1696	1.39573e-10	3R	6374651	hth	hth-in	intronic	67	0.416149	8	C	A	A
3R	12969893	m-cup	-1281	intergenic	50	0.314465	12	G	T	T	0.75284	41.1293	1.42485e-10	3R	10526627	kibra	kibra-in	intronic	29	0.177914	19	G	A	G
3R	12969893	TwdlW	1773	intergenic	50	0.314465	12	G	T	T	0.75284	41.1293	1.42485e-10	3R	10526627	kibra	kibra-in	intronic	29	0.177914	19	G	A	G
3R	19085605	CG13827	CG13827:2	synonymous	45	0.279503	18	G	T	G	0.57561	41.1274	1.42623e-10	3R	17404949	InR	InR:9	synonymous	62	0.394904	20	T	G	T
3R	19085605	CG13827	CG13827:2	synonymous	45	0.279503	18	G	T	G	0.57561	41.1274	1.42623e-10	3R	17404949	InR	InR:9	synonymous	62	0.394904	20	T	G	T
3L	4352267	Cip4	Cip4-in	intronic	26	0.157576	12	T	A	T	0.82017	41.1036	1.44369e-10	3R	21871353	gro	gro:12	synonymous	29	0.18239	10	C	T	C
3R	20319527	nAcRbeta-96A	-15410	intergenic	41	0.262821	15	C	T	C	-0.61483	41.0946	1.45036e-10	3L	3341116	kst	kst-in	intronic	63	0.384146	16	G	C	C
3R	20319527	mir-1017	5025	intergenic	41	0.262821	15	C	T	C	-0.61483	41.0946	1.45036e-10	3L	3341116	kst	kst-in	intronic	63	0.384146	16	G	C	C
2L	10455511	CG5322	CG5322-cds	nonsense	73	0.45625	16	A	G	A	-0.49168	41.0637	1.47348e-10	X	4333134	bi	bi-in	intronic	66	0.402439	11	A	G	G
2L	8312293	CG7806	CG7806-in	intronic	76	0.469136	14	A	G	G	-0.47397	41.0475	1.48575e-10	2R	9792632	shot	shot:32	synonymous	77	0.475309	18	G	A	A
3R	23286686	CG13978	-3225	intergenic	66	0.4125	19	A	C	C	-0.54523	41.0315	1.49798e-10	2R	20887461	zip	zip-in	intronic	46	0.278788	16	A	G	G
3R	23286686	side	42439	intergenic	66	0.4125	19	A	C	C	-0.54523	41.0315	1.49798e-10	2R	20887461	zip	zip-in	intronic	46	0.278788	16	A	G	G
3R	26722415	Cyp4c3	Cyp4c3-in	intronic	64	0.405063	20	A	G	A	-0.60539	41.0285	1.50024e-10	3L	10982553	klu	klu-in	intronic	32	0.191617	11	A	T	A
3R	684384	opa	opa-in	intronic	48	0.301887	17	A	G	A	0.78352	41.0146	1.51099e-10	2L	14401341	elB	elB-in	intronic	17	0.103659	8	T	G	T
3L	6562715	CG32397	CG32397-in	intronic	30	0.182927	8	C	A	C	0.63738	41.0143	1.51118e-10	3L	8841034	dally	dally-in	intronic	56	0.339394	17	C	T	C
3L	6562715	CG18769	CG18769-in	intronic	30	0.182927	8	C	A	C	0.63738	41.0143	1.51118e-10	3L	8841034	dally	dally-in	intronic	56	0.339394	17	C	T	C
3R	12932887	cher	cher:15	synonymous	78	0.484472	17	A	T	A	0.57621	40.9624	1.55186e-10	2L	2901844	lilli	lilli-in	intronic	43	0.263804	14	T	G	T
3R	10910510	CG6966	CG6966-in	intronic	57	0.347561	13	A	C	C	-0.53991	40.9018	1.60075e-10	2L	706198	ds	ds-cds	synonymous	57	0.349693	13	T	A	T
3R	10910510	CG6966	CG6966-in	intronic	57	0.347561	13	A	C	C	-0.53991	40.9018	1.60075e-10	2L	706198	ds	ds-cds	synonymous	57	0.349693	13	T	A	T
3R	2676945	ftz	-13101	intergenic	13	0.08125	7	A	C	A	0.8153	40.8909	1.6097e-10	3R	17874237	how	how-in	intronic	77	0.490446	18	T	A	T
3R	2676945	Scr	1242	intergenic	13	0.08125	7	A	C	A	0.8153	40.8909	1.6097e-10	3R	17874237	how	how-in	intronic	77	0.490446	18	T	A	T
3R	2676945	ftz	-13101	intergenic	13	0.08125	7	A	C	A	0.8158	40.8787	1.6198e-10	3R	17874254	how	how-in	intronic	76	0.490323	21	A	G	A
3R	2676945	Scr	1242	intergenic	13	0.08125	7	A	C	A	0.8158	40.8787	1.6198e-10	3R	17874254	how	how-in	intronic	76	0.490323	21	A	G	A
2R	18615473	jbug	jbug-in	intronic	48	0.305732	8	T	G	G	-0.56716	40.8583	1.63679e-10	X	3044517	N	N-in	intronic	63	0.379518	13	A	T	A
2L	21066038	CG9265	CG9265-in	intronic	47	0.288344	21	C	A	C	-0.52839	40.852	1.64201e-10	3R	18963307	hh	hh-in	intronic	76	0.47205	18	C	G	C
2L	9256435	CG42844	-48002	intergenic	66	0.4125	19	C	T	C	-0.52813	40.8474	1.64589e-10	2L	7942769	Snoo	Snoo-in	intronic	52	0.327044	14	C	T	C
2L	9256435	lectin-30A	1581	intergenic	66	0.4125	19	C	T	C	-0.52813	40.8474	1.64589e-10	2L	7942769	Snoo	Snoo-in	intronic	52	0.327044	14	C	T	C
2L	9256435	Ggamma30A	Ggamma30A-in	intergenic	66	0.4125	19	C	T	C	-0.52813	40.8474	1.64589e-10	2L	7942769	Snoo	Snoo-in	intronic	52	0.327044	14	C	T	C
3L	18081987	CG13698	-222	intergenic	37	0.232704	11	A	T	A	-0.75069	40.834	1.65729e-10	2R	16712238	insc	insc:3	missense	38	0.240506	9	C	T	T
3L	18081987	CG34253	1571	intergenic	37	0.232704	11	A	T	A	-0.75069	40.834	1.65729e-10	2R	16712238	insc	insc:3	missense	38	0.240506	9	C	T	T
3L	19130472	fz2	-5526	intergenic	42	0.26087	12	C	T	T	0.56173	40.8283	1.66206e-10	3L	12610328	caup	caup:2	synonymous	70	0.432099	12	T	C	T
3L	19130472	Spn75F	7707	intergenic	42	0.26087	12	C	T	T	0.56173	40.8283	1.66206e-10	3L	12610328	caup	caup:2	synonymous	70	0.432099	12	T	C	T
2R	9882520	mam	mam-in	intronic	43	0.259036	12	C	T	C	-0.65117	40.7341	1.74418e-10	2R	13726057	grh	grh-in	intronic	32	0.197531	11	G	A	G
2R	13726057	grh	grh-in	intronic	32	0.197531	11	G	A	G	-0.65117	40.7341	1.74418e-10	2R	9882520	mam	mam-in	intronic	43	0.259036	12	C	T	C
2L	6307609	CG13984	-1210	intergenic	43	0.26875	14	T	C	T	-0.76181	40.7146	1.7617e-10	3R	26134311	hdc	hdc-in	intronic	24	0.146341	8	A	T	A
2L	6307609	CG42735	36098	intergenic	43	0.26875	14	T	C	T	-0.76181	40.7146	1.7617e-10	3R	26134311	hdc	hdc-in	intronic	24	0.146341	8	A	T	A
2L	6307609	Ddr	Ddr-in	intronic	43	0.26875	14	T	C	T	-0.76181	40.7146	1.7617e-10	3R	26134311	hdc	hdc-in	intronic	24	0.146341	8	A	T	A
3L	2143432	zormin	zormin-in	intronic	71	0.486301	13	C	T	C	0.50943	40.708	1.76759e-10	3R	12103312	gish	gish-in	intronic	61	0.396104	23	T	G	G
3R	18642300	CG4704	-27614	intergenic	63	0.406452	11	C	G	G	0.57563	40.6952	1.77921e-10	3L	8846490	dally	dally-in	intronic	42	0.251497	15	T	C	T
3R	18642300	CG13840	349	intergenic	63	0.406452	11	C	G	G	0.57563	40.6952	1.77921e-10	3L	8846490	dally	dally-in	intronic	42	0.251497	15	T	C	T
X	2069819	Cyp4d2	-1105	intergenic	42	0.25	10	T	A	A	0.55866	40.69	1.78401e-10	3L	16001572	mib1	mib1:3	synonymous	58	0.3625	20	G	T	G
X	2069819	Cyp4d14	473	intergenic	42	0.25	10	T	A	A	0.55866	40.69	1.78401e-10	3L	16001572	mib1	mib1:3	synonymous	58	0.3625	20	G	T	G
3L	9428857	Bet3	-3162	intergenic	81	0.5	14	T	C	C	-0.50626	40.6578	1.8136e-10	2L	4363753	Traf4	Traf4-in	intronic	60	0.377358	13	T	C	C
3L	9428857	CG42526	358	intergenic	81	0.5	14	T	C	C	-0.50626	40.6578	1.8136e-10	2L	4363753	Traf4	Traf4-in	intronic	60	0.377358	13	T	C	C
3L	9428857	MTF-1	MTF-1-in	intronic	81	0.5	14	T	C	C	-0.50626	40.6578	1.8136e-10	2L	4363753	Traf4	Traf4-in	intronic	60	0.377358	13	T	C	C
2L	2395634	VGlut	-4672	intergenic	24	0.143713	17	C	T	C	-0.68852	40.6512	1.81979e-10	X	1996350	csw	csw-in	intronic	78	0.464286	10	T	C	C
2L	2395634	CG3557	9842	intergenic	24	0.143713	17	C	T	C	-0.68852	40.6512	1.81979e-10	X	1996350	csw	csw-in	intronic	78	0.464286	10	T	C	C
X	10317219	CG12640	-9279	intergenic	75	0.446429	14	T	A	A	-0.57803	40.6028	1.86535e-10	3R	9899900	foxo	foxo-in	intronic	45	0.28125	16	G	T	T
X	10317219	RabX2	4967	intergenic	75	0.446429	14	T	A	A	-0.57803	40.6028	1.86535e-10	3R	9899900	foxo	foxo-in	intronic	45	0.28125	16	G	T	T
X	10317219	CG32683	CG32683-in	intronic	75	0.446429	14	T	A	A	-0.57803	40.6028	1.86535e-10	3R	9899900	foxo	foxo-in	intronic	45	0.28125	16	G	T	T
3R	25403945	CG7567	-9014	intergenic	50	0.3125	22	A	T	T	0.55833	40.5669	1.90001e-10	2R	18156237	dve	dve-in	intronic	74	0.4625	16	A	T	T
3R	25403945	Dr	12938	intergenic	50	0.3125	22	A	T	T	0.55833	40.5669	1.90001e-10	2R	18156237	dve	dve-in	intronic	74	0.4625	16	A	T	T
2L	10190093	Sur	Sur-in	missense	61	0.376543	20	T	C	C	0.50605	40.5538	1.91277e-10	2L	12469422	bun	bun-in	intronic	70	0.4375	14	T	C	T
2L	10190093	CG31874	CG31874-PA	missense	61	0.376543	20	T	C	C	0.50605	40.5538	1.91277e-10	2L	12469422	bun	bun-in	intronic	70	0.4375	14	T	C	T
2L	10190093	CG31874	CG31874-PA	missense	61	0.376543	20	T	C	C	0.50605	40.5538	1.91277e-10	2L	12469422	bun	bun-in	intronic	70	0.4375	14	T	C	T
2L	10190093	Sur	Sur-in	missense	61	0.376543	20	T	C	C	0.50605	40.5538	1.91277e-10	2L	12469422	bun	bun-in	intronic	70	0.4375	14	T	C	T
3L	9583285	CG42673	CG42673-in	intronic	22	0.134146	7	A	G	A	0.76625	40.5247	1.94149e-10	2R	13719876	grh	grh-in	intronic	74	0.45122	12	T	C	T
2R	2705145	koi	koi-u3	intergenic	23	0.141104	11	C	A	C	0.71122	40.5194	1.94676e-10	3R	26161233	hdc	hdc-in	intronic	52	0.333333	15	C	T	C
3L	6455943	CG42747	CG42747-in	intergenic	81	0.496933	12	A	G	G	0.63328	40.479	1.98739e-10	3R	21871353	gro	gro:12	synonymous	29	0.18239	10	C	T	C
X	10609266	CG32676	CG32676:3	synonymous	22	0.134969	12	A	G	A	-0.79345	40.4743	1.9922e-10	X	18457815	Bx	Bx-in	intronic	30	0.182927	10	C	T	C
3R	13691972	tinc	tinc-in	intronic	34	0.21519	13	A	G	A	0.7041	40.4596	2.00722e-10	3L	12212594	app	app-in	intronic	70	0.419162	22	A	G	G
X	19997803	CG15323	-6338	intergenic	55	0.337423	7	G	A	A	-0.59202	40.4461	2.02112e-10	3R	27426085	CycG	CycG-in	intronic	38	0.2375	17	C	T	C
X	19997803	CG15323	-6338	intergenic	55	0.337423	7	G	A	A	-0.59202	40.4461	2.02112e-10	3R	27426085	CycG	CycG-in	intronic	38	0.2375	17	C	T	C
X	19997803	CG42581	7296	intergenic	55	0.337423	7	G	A	A	-0.59202	40.4461	2.02112e-10	3R	27426085	CycG	CycG-in	intronic	38	0.2375	17	C	T	C
X	19997803	CG42581	7296	intergenic	55	0.337423	7	G	A	A	-0.59202	40.4461	2.02112e-10	3R	27426085	CycG	CycG-in	intronic	38	0.2375	17	C	T	C
2R	8261639	CG13160	CG13160:10	synonymous	80	0.493827	21	C	T	C	-0.77992	40.4398	2.02765e-10	2L	14401341	elB	elB-in	intronic	17	0.103659	8	T	G	T
X	3331223	CG16782	-21826	intergenic	66	0.39521	13	G	A	A	-0.51576	40.4233	2.04492e-10	3R	23012372	Ser	Ser-in	intronic	79	0.490683	14	C	A	A
X	3331223	CG14269	1383	intergenic	66	0.39521	13	G	A	A	-0.51576	40.4233	2.04492e-10	3R	23012372	Ser	Ser-in	intronic	79	0.490683	14	C	A	A
X	3331223	CG12535	CG12535-in	intergenic	66	0.39521	13	G	A	A	-0.51576	40.4233	2.04492e-10	3R	23012372	Ser	Ser-in	intronic	79	0.490683	14	C	A	A
3R	26722541	Cyp4c3	Cyp4c3-in	intronic	67	0.41875	16	A	C	A	-0.59397	40.3933	2.07653e-10	3L	10982553	klu	klu-in	intronic	32	0.191617	11	A	T	A
2R	14748545	Jheh3	Jheh3-PA	synonymous	28	0.168675	14	T	C	T	-0.71901	40.3868	2.08346e-10	3L	2735922	Mrtf	Mrtf-in	intronic	47	0.284848	16	A	G	A
3R	4548939	CG8145	CG8145-u5	intergenic	65	0.411392	17	C	A	C	-0.60437	40.3815	2.08912e-10	X	2586220	per	per-in	intronic	42	0.25	21	G	T	T
3R	12544459	Ubx	Ubx-in	intronic	46	0.2875	17	T	A	T	-0.57427	40.36	2.11218e-10	3L	15965569	brm	brm:4	synonymous	81	0.5	21	A	G	A
3L	10694960	CG12523	-99332	intergenic	43	0.275641	7	C	A	C	-0.6364	40.3353	2.13915e-10	2R	18136674	dve	dve-in	intronic	39	0.24375	18	A	G	A
3L	10694960	NijA	4986	intergenic	43	0.275641	7	C	A	C	-0.6364	40.3353	2.13915e-10	2R	18136674	dve	dve-in	intronic	39	0.24375	18	A	G	A
2L	10455511	CG5322	CG5322-cds	nonsense	73	0.45625	16	A	G	A	-0.49134	40.3322	2.14245e-10	X	4333125	bi	bi-in	intronic	66	0.402439	11	C	A	A
2L	2395634	VGlut	-4672	intergenic	24	0.143713	17	C	T	C	-0.68344	40.3145	2.16203e-10	X	1996355	csw	csw-in	intronic	78	0.467066	11	T	A	A
2L	2395634	CG3557	9842	intergenic	24	0.143713	17	C	T	C	-0.68344	40.3145	2.16203e-10	X	1996355	csw	csw-in	intronic	78	0.467066	11	T	A	A
3R	25779086	Takr99D	Takr99D:5	synonymous	63	0.388889	16	G	A	A	0.70721	40.273	2.2084e-10	2L	4036836	ed	ed-in	intronic	27	0.164634	14	C	G	C
3R	25779086	Takr99D	Takr99D:5	synonymous	63	0.388889	16	G	A	A	0.70721	40.273	2.2084e-10	2L	4036836	ed	ed-in	intronic	27	0.164634	14	C	G	C
2R	13511917	rhi	-4077	intergenic	65	0.40625	13	C	A	A	0.56039	40.2513	2.23311e-10	2R	14167723	sbb	sbb-in	intronic	45	0.279503	13	G	A	G
2R	13511917	snoRNA:Or-aca4	7495	intergenic	65	0.40625	13	C	A	A	0.56039	40.2513	2.23311e-10	2R	14167723	sbb	sbb-in	intronic	45	0.279503	13	G	A	G
2R	13511917	CG10936	CG10936-in	intronic	65	0.40625	13	C	A	A	0.56039	40.2513	2.23311e-10	2R	14167723	sbb	sbb-in	intronic	45	0.279503	13	G	A	G
3R	25779086	Takr99D	Takr99D:5	synonymous	63	0.388889	16	G	A	A	0.70521	40.2479	2.23697e-10	2L	4036835	ed	ed-in	intronic	27	0.163636	14	A	C	A
3R	25779086	Takr99D	Takr99D:5	synonymous	63	0.388889	16	G	A	A	0.70521	40.2479	2.23697e-10	2L	4036835	ed	ed-in	intronic	27	0.163636	14	A	C	A
3R	19085605	CG13827	CG13827:2	synonymous	45	0.279503	18	G	T	G	0.56939	40.2399	2.24615e-10	3R	17405006	InR	InR:9	missense	63	0.401274	19	A	G	A
3R	19085605	CG13827	CG13827:2	synonymous	45	0.279503	18	G	T	G	0.56939	40.2399	2.24615e-10	3R	17405006	InR	InR:9	missense	63	0.401274	19	A	G	A
3R	23632225	CG34353	CG34353-in	intronic	30	0.181818	18	A	G	A	0.73487	40.2316	2.25573e-10	3R	26179528	hdc	hdc-in	intronic	29	0.176829	13	G	A	A
X	5473781	Vsx1	-14525	intergenic	64	0.383234	10	G	A	A	0.5043	40.2297	2.2579e-10	2L	4367902	Traf4	Traf4-in	intronic	78	0.4875	12	C	G	G
X	5473781	Vsx2	19565	intergenic	64	0.383234	10	G	A	A	0.5043	40.2297	2.2579e-10	2L	4367902	Traf4	Traf4-in	intronic	78	0.4875	12	C	G	G
3R	9114207	CG15887	CG15887-in	intronic	47	0.291925	15	A	G	A	0.6471	40.2062	2.28528e-10	3R	20478976	ash2	ash2-u3	UTR	30	0.181818	18	G	T	G
2R	17109801	ASPP	ASPP-in	intronic	56	0.339394	12	C	A	C	0.66079	40.2045	2.28721e-10	3R	21871353	gro	gro:12	synonymous	29	0.18239	10	C	T	C
3L	5363442	Ir64a	-8444	intergenic	23	0.142857	4	T	C	T	-0.76014	40.1929	2.30078e-10	3L	14073197	btl	btl-cds	synonymous	50	0.306748	20	G	A	G
3L	5363442	CG10635	2334	intergenic	23	0.142857	4	T	C	T	-0.76014	40.1929	2.30078e-10	3L	14073197	btl	btl-cds	synonymous	50	0.306748	20	G	A	G
3L	7607016	CG33275	CG33275-in	intronic	77	0.458333	13	G	C	C	0.51728	40.1832	2.31224e-10	2R	13691438	grh	grh-in	intronic	49	0.302469	11	C	T	T
X	9174772	c11.1	c11.1:3	nonsense	32	0.192771	15	G	A	G	0.71098	40.1718	2.32586e-10	3R	21871353	gro	gro:12	synonymous	29	0.18239	10	C	T	C
3R	12932887	cher	cher:15	synonymous	78	0.484472	17	A	T	A	0.52957	40.153	2.34833e-10	2L	2902302	lilli	lilli-in	intronic	49	0.29878	18	C	A	C
X	2761074	CG14416	-4949	intergenic	40	0.240964	13	C	G	C	-0.64588	40.1521	2.34938e-10	3L	1466850	rho	rho:3	synonymous	49	0.293413	16	T	C	C
X	2761074	CG14416	-4949	intergenic	40	0.240964	13	C	G	C	-0.64588	40.1521	2.34938e-10	3L	1466846	rho	rho:3	synonymous	49	0.293413	16	C	T	T
X	2761074	CG12498	56195	intergenic	40	0.240964	13	C	G	C	-0.64588	40.1521	2.34938e-10	3L	1466850	rho	rho:3	synonymous	49	0.293413	16	T	C	C
X	2761074	CG12498	56195	intergenic	40	0.240964	13	C	G	C	-0.64588	40.1521	2.34938e-10	3L	1466846	rho	rho:3	synonymous	49	0.293413	16	C	T	T
3L	814903	CG13900	-11807	intergenic	70	0.416667	13	C	A	A	0.52104	40.1509	2.35086e-10	3L	8566249	rhea	rhea:19	missense	54	0.329268	14	C	A	C
3L	814903	CG13898	10852	intergenic	70	0.416667	13	C	A	A	0.52104	40.1509	2.35086e-10	3L	8566249	rhea	rhea:19	missense	54	0.329268	14	C	A	C
2L	5292264	vri	-7383	intergenic	70	0.443038	18	C	T	T	0.52186	40.1495	2.35256e-10	3L	4155383	nab	nab:5	synonymous	46	0.296774	7	G	T	G
2L	5292264	Bub1	9262	intergenic	70	0.443038	18	C	T	T	0.52186	40.1495	2.35256e-10	3L	4155383	nab	nab:5	synonymous	46	0.296774	7	G	T	G
2R	9921308	Prosap	-26653	intergenic	66	0.415094	12	T	G	T	-0.6005	40.134	2.37122e-10	3R	2724922	Antp	Antp-in	intronic	41	0.251534	12	T	G	G
2R	9921308	CG18371	4697	intergenic	66	0.415094	12	T	G	T	-0.6005	40.134	2.37122e-10	3R	2724922	Antp	Antp-in	intronic	41	0.251534	12	T	G	G
2R	9921308	mam	mam-in	intronic	66	0.415094	12	T	G	T	-0.6005	40.134	2.37122e-10	3R	2724922	Antp	Antp-in	intronic	41	0.251534	12	T	G	G
3R	2724922	Antp	Antp-in	intronic	41	0.251534	12	T	G	G	-0.6005	40.134	2.37122e-10	2R	9921308	mam	mam-in	intronic	66	0.415094	12	T	G	T
3R	10910510	CG6966	CG6966-in	intronic	57	0.347561	13	A	C	C	-0.52965	40.1317	2.37409e-10	2L	706188	ds	ds-cds	missense	56	0.345679	15	G	A	G
3R	10910510	CG6966	CG6966-in	intronic	57	0.347561	13	A	C	C	-0.52965	40.1317	2.37409e-10	2L	706188	ds	ds-cds	missense	56	0.345679	15	G	A	G
3R	18642301	CG4704	-27613	intergenic	63	0.401274	11	C	G	G	0.56899	40.0963	2.41751e-10	3L	8846490	dally	dally-in	intronic	42	0.251497	15	T	C	T
3R	18642301	CG13840	350	intergenic	63	0.401274	11	C	G	G	0.56899	40.0963	2.41751e-10	3L	8846490	dally	dally-in	intronic	42	0.251497	15	T	C	T
2L	14065497	CG16879	-39157	intergenic	72	0.461538	10	C	G	G	0.57065	40.0167	2.51801e-10	3R	25289123	Ptp99A	Ptp99A-in	intronic	57	0.354037	10	T	G	T
2L	14065499	CG16879	-39155	intergenic	71	0.458065	12	C	T	T	0.57065	40.0167	2.51801e-10	3R	25289123	Ptp99A	Ptp99A-in	intronic	57	0.354037	10	T	G	T
2L	14065497	nimC4	16634	intergenic	72	0.461538	10	C	G	G	0.57065	40.0167	2.51801e-10	3R	25289123	Ptp99A	Ptp99A-in	intronic	57	0.354037	10	T	G	T
2L	14065499	nimC4	16636	intergenic	71	0.458065	12	C	T	T	0.57065	40.0167	2.51801e-10	3R	25289123	Ptp99A	Ptp99A-in	intronic	57	0.354037	10	T	G	T
2L	14065497	nAcRalpha-34E	nAcRalpha-34E-in	intronic	72	0.461538	10	C	G	G	0.57065	40.0167	2.51801e-10	3R	25289123	Ptp99A	Ptp99A-in	intronic	57	0.354037	10	T	G	T
2L	14065499	nAcRalpha-34E	nAcRalpha-34E-in	intronic	71	0.458065	12	C	T	T	0.57065	40.0167	2.51801e-10	3R	25289123	Ptp99A	Ptp99A-in	intronic	57	0.354037	10	T	G	T
2R	4908202	CG8170	CG8170-in	intronic	68	0.427673	18	G	A	A	-0.53518	40.0074	2.53003e-10	2L	4051975	ed	ed-in	intronic	42	0.265823	12	T	C	T
2R	4908202	CG8170	CG8170-in	intronic	68	0.427673	18	G	A	A	-0.53518	40.0074	2.53003e-10	2L	4051975	ed	ed-in	intronic	42	0.265823	12	T	C	T
2L	8425523	Akap200	Akap200-in	intronic	51	0.331169	15	C	G	G	-0.50682	39.999	2.54093e-10	2L	7906479	Snoo	Snoo-in	intronic	77	0.484277	13	A	T	A
3R	2677556	ftz	-12490	intergenic	17	0.10828	9	T	A	T	0.80322	39.9983	2.54186e-10	2L	3478879	Thor	Thor-in	intronic	64	0.392638	19	C	G	C
3R	2677556	Scr	1853	intergenic	17	0.10828	9	T	A	T	0.80322	39.9983	2.54186e-10	2L	3478879	Thor	Thor-in	intronic	64	0.392638	19	C	G	C
X	8550834	CG12772	-20262	intergenic	27	0.161677	13	A	T	A	0.70333	39.9876	2.55582e-10	2L	5303101	vri	vri-in	intronic	62	0.385093	11	T	C	T
X	8550834	oc	6124	intergenic	27	0.161677	13	A	T	A	0.70333	39.9876	2.55582e-10	2L	5303101	vri	vri-in	intronic	62	0.385093	11	T	C	T
2R	15597926	Obp56e	-1924	intergenic	56	0.343558	11	G	T	G	0.55106	39.9602	2.59191e-10	3R	26169618	hdc	hdc-in	intronic	57	0.375	15	C	T	T
2R	15597926	Obp56d	6626	intergenic	56	0.343558	11	G	T	G	0.55106	39.9602	2.59191e-10	3R	26169618	hdc	hdc-in	intronic	57	0.375	15	C	T	T
3L	11924362	byn	-119	intergenic	48	0.289157	16	T	G	T	-0.50423	39.9411	2.61737e-10	3R	10534351	kibra	kibra-in	intronic	60	0.368098	11	C	T	C
3L	11924362	CG5718	6505	intergenic	48	0.289157	16	T	G	T	-0.50423	39.9411	2.61737e-10	3R	10534351	kibra	kibra-in	intronic	60	0.368098	11	C	T	C
3R	15712743	ninaE	ninaE-in	intronic	41	0.246988	17	T	A	T	0.64308	39.9155	2.65187e-10	3L	7989817	nmo	nmo-in	intronic	42	0.251497	13	C	G	C
3L	11103453	CG7638	CG7638:2	synonymous	58	0.353659	16	A	G	A	-0.51902	39.9155	2.65196e-10	2R	17424212	Egfr	Egfr-in	missense	61	0.38125	20	A	G	A
3L	11103453	CG7638	CG7638:2	synonymous	58	0.353659	16	A	G	A	-0.51902	39.9155	2.65196e-10	2R	17424212	Egfr	Egfr-in	missense	61	0.38125	20	A	G	A
2R	8729334	Cyp9h1	Cyp9h1-cds	synonymous	60	0.363636	21	G	T	T	0.62362	39.9119	2.6568e-10	2R	9764363	shot	shot:19	missense	34	0.204819	24	G	A	A
3L	1920630	Dbx	-677	intergenic	38	0.230303	13	G	T	G	-0.56975	39.9101	2.65926e-10	3R	6369638	hth	hth-in	intronic	77	0.490446	10	T	C	C
3L	1920630	CG1887	10433	intergenic	38	0.230303	13	G	T	G	-0.56975	39.9101	2.65926e-10	3R	6369638	hth	hth-in	intronic	77	0.490446	10	T	C	C
2L	19858671	sick	sick-in	intronic	26	0.1625	12	A	C	A	0.6374	39.9001	2.67296e-10	3L	3336529	kst	-314	intergenic	45	0.27439	14	T	A	A
3R	13028042	CG31262	-14796	intergenic	34	0.209877	9	T	A	T	0.63603	39.8988	2.67472e-10	2R	18026013	a	a-in	intronic	43	0.26875	13	T	A	A
3R	13028042	Mur89F	42372	intergenic	34	0.209877	9	T	A	T	0.63603	39.8988	2.67472e-10	2R	18026013	a	a-in	intronic	43	0.26875	13	T	A	A
2R	18615457	jbug	jbug-in	intronic	45	0.290323	12	G	A	A	-0.58556	39.8974	2.67655e-10	X	3044522	N	N-in	intronic	63	0.381818	12	C	G	C
3R	17384232	CG15498	-9009	intergenic	23	0.149351	10	C	T	C	0.68998	39.8918	2.68426e-10	3L	12234912	app	app-in	intronic	41	0.248485	21	C	A	C
3R	17384232	slou	1228	intergenic	23	0.149351	10	C	T	C	0.68998	39.8918	2.68426e-10	3L	12234912	app	app-in	intronic	41	0.248485	21	C	A	C
X	9174970	c11.1	c11.1:3	synonymous	33	0.197605	15	C	A	C	0.71693	39.8759	2.70624e-10	3R	21871353	gro	gro:12	synonymous	29	0.18239	10	C	T	C
X	1484335	Mur2B	Mur2B-in	intergenic	59	0.355422	8	C	A	C	0.66167	39.8729	2.71044e-10	2L	378200	al	al-u5	UTR	35	0.212121	19	C	T	C
X	1484335	br	br-in	intergenic	59	0.355422	8	C	A	C	0.66167	39.8729	2.71044e-10	2L	378200	al	al-u5	UTR	35	0.212121	19	C	T	C
3L	6961206	Mis12	Mis12-u3	UTR	68	0.427673	8	G	A	G	0.77435	39.8636	2.72327e-10	2L	14400991	elB	elB-in	intronic	21	0.12963	14	C	A	C
X	19506885	Shawn	Shawn-u5	missense	68	0.43038	10	C	G	C	0.49377	39.8183	2.78721e-10	2L	4106466	ed	ed-in	intronic	71	0.440994	11	A	G	A
X	19506885	Tyler	Tyler:11	missense	68	0.43038	10	C	G	C	0.49377	39.8183	2.78721e-10	2L	4106466	ed	ed-in	intronic	71	0.440994	11	A	G	A
X	19506885	Shawn	Shawn-u5	missense	68	0.43038	10	C	G	C	0.49377	39.8183	2.78721e-10	2L	4106466	ed	ed-in	intronic	71	0.440994	11	A	G	A
X	19506885	Tyler	Tyler:11	missense	68	0.43038	10	C	G	C	0.49377	39.8183	2.78721e-10	2L	4106466	ed	ed-in	intronic	71	0.440994	11	A	G	A
2L	3940776	CG34176	-63304	intergenic	64	0.4	11	G	A	G	-0.72246	39.8125	2.79544e-10	2L	14401341	elB	elB-in	intronic	17	0.103659	8	T	G	T
2L	3940776	CG31773	26488	intergenic	64	0.4	11	G	A	G	-0.72246	39.8125	2.79544e-10	2L	14401341	elB	elB-in	intronic	17	0.103659	8	T	G	T
2L	3940776	fred	fred-in	intronic	64	0.4	11	G	A	G	-0.72246	39.8125	2.79544e-10	2L	14401341	elB	elB-in	intronic	17	0.103659	8	T	G	T
2L	14401341	elB	elB-in	intronic	17	0.103659	8	T	G	T	-0.72246	39.8125	2.79544e-10	2L	3940776	fred	fred-in	intronic	64	0.4	11	G	A	G
2L	4024761	ed	-6618	intergenic	65	0.411392	12	C	T	T	0.51758	39.8005	2.81279e-10	X	4334402	bi	bi-in	intronic	51	0.303571	16	C	T	C
2L	4024761	CG10039	15762	intergenic	65	0.411392	12	C	T	T	0.51758	39.8005	2.81279e-10	X	4334402	bi	bi-in	intronic	51	0.303571	16	C	T	C
3R	10131385	su(Hw)		synonymous	53	0.32716	11	C	T	C	0.52104	39.7757	2.84869e-10	X	17215688	B-H2	85165-85166-AE003505.4-dummy-promoter	intronic	81	0.490909	10	C	T	T
3R	11141305	CG14866	-890	intergenic	58	0.351515	18	C	T	T	0.58764	39.7731	2.8525e-10	2L	4043894	ed	ed-in	intronic	34	0.216561	13	G	A	G
3R	11141305	CG14866	-890	intergenic	58	0.351515	18	C	T	T	0.58764	39.7731	2.8525e-10	2L	4043894	ed	ed-in	intronic	34	0.216561	13	G	A	G
3R	11141305	Tm2	385	intergenic	58	0.351515	18	C	T	T	0.58764	39.7731	2.8525e-10	2L	4043894	ed	ed-in	intronic	34	0.216561	13	G	A	G
3R	11141305	Tm2	385	intergenic	58	0.351515	18	C	T	T	0.58764	39.7731	2.8525e-10	2L	4043894	ed	ed-in	intronic	34	0.216561	13	G	A	G
3R	3403025	CG34127	CG34127-in	intronic	28	0.171779	14	C	G	C	-0.7313	39.7674	2.86073e-10	X	15508666	sog	sog-in	intronic	33	0.197605	14	G	A	G
2L	6047488	slmo	slmo-PD	synonymous	35	0.220126	13	G	A	G	-0.71223	39.766	2.86291e-10	X	17207965	B-H2	-649	intergenic	31	0.197452	5	G	T	G
2L	6047488	CG34179	CG34179-u3	synonymous	35	0.220126	13	G	A	G	-0.71223	39.766	2.86291e-10	X	17207965	B-H2	-649	intergenic	31	0.197452	5	G	T	G
2L	1575791	haf	haf-in	intronic	66	0.415094	15	G	C	G	-0.51228	39.7636	2.86644e-10	X	4362420	bi	bi-in	intronic	59	0.353293	14	G	A	A
2L	2395634	VGlut	-4672	intergenic	24	0.143713	17	C	T	C	-0.67988	39.7312	2.91438e-10	X	1995831	csw	csw-in	intronic	77	0.466667	14	G	C	C
2L	2395634	CG3557	9842	intergenic	24	0.143713	17	C	T	C	-0.67988	39.7312	2.91438e-10	X	1995831	csw	csw-in	intronic	77	0.466667	14	G	C	C
3R	10996320	Mf	-27	intergenic	42	0.2625	10	G	A	G	0.68879	39.731	2.91457e-10	3L	332500	Ptpmeg	Ptpmeg-in	intronic	28	0.167665	14	G	A	G
3R	10996320	CG6904	22991	intergenic	42	0.2625	10	G	A	G	0.68879	39.731	2.91457e-10	3L	332500	Ptpmeg	Ptpmeg-in	intronic	28	0.167665	14	G	A	G
2L	6229575	Ddr	-23548	intergenic	21	0.128049	19	C	G	C	-0.83183	39.7241	2.92497e-10	3L	3341960	kst	kst-in	intronic	31	0.191358	12	C	G	C
2L	6229575	Ugt37b1	2733	intergenic	21	0.128049	19	C	G	C	-0.83183	39.7241	2.92497e-10	3L	3341960	kst	kst-in	intronic	31	0.191358	12	C	G	C
2R	6195436	JhI-1	JhI-1-PB	missense	65	0.414013	20	A	G	A	0.68778	39.639	3.05515e-10	3R	6202133	Rfx	Rfx-in	intronic	26	0.165605	7	T	C	T
3L	1437339	SA-2	SA-2:7	synonymous	67	0.401198	20	G	T	G	0.54684	39.6225	3.08116e-10	2L	4080036	ed	ed-in	intronic	46	0.296774	20	A	G	A
3L	1437339	SA-2	SA-2:7	synonymous	67	0.401198	20	G	T	G	0.54684	39.6225	3.08116e-10	2L	4080036	ed	ed-in	intronic	46	0.296774	20	A	G	A
X	3102507	dnc	dnc-in	intronic	25	0.151515	7	C	T	C	0.63515	39.5924	3.12898e-10	3L	12226104	app	app-in	intronic	83	0.497006	13	A	T	T
3R	25587378	kay	-5119	intergenic	42	0.264151	11	G	A	G	0.57646	39.5906	3.13196e-10	3R	17424201	InR	InR-in	intronic	47	0.288344	13	G	A	G
3R	25587378	kay	-5119	intergenic	42	0.264151	11	G	A	G	0.57646	39.5906	3.13196e-10	3R	17424201	InR	InR-in	intronic	47	0.288344	13	G	A	G
3R	25587378	yata	8049	intergenic	42	0.264151	11	G	A	G	0.57646	39.5906	3.13196e-10	3R	17424201	InR	InR-in	intronic	47	0.288344	13	G	A	G
3R	25587378	yata	8049	intergenic	42	0.264151	11	G	A	G	0.57646	39.5906	3.13196e-10	3R	17424201	InR	InR-in	intronic	47	0.288344	13	G	A	G
2R	19466294	apt	apt-in	intronic	57	0.347561	15	A	G	A	0.5174	39.5888	3.13476e-10	3L	13257181	caps	caps-in	intronic	60	0.37037	15	A	G	A
3R	25987585	CG31030	-2829	intergenic	71	0.430303	10	T	C	T	0.52152	39.5851	3.14065e-10	2R	13661404	fab1	-65	intergenic	48	0.289157	16	T	C	T
3R	25987585	CG11498	1390	intergenic	71	0.430303	10	T	C	T	0.52152	39.5851	3.14065e-10	2R	13661404	fab1	-65	intergenic	48	0.289157	16	T	C	T
3L	16502802	CG12436	-19805	intergenic	47	0.281437	12	G	A	G	0.54093	39.5808	3.14764e-10	2R	9755498	shot	shot-in	intronic	62	0.389937	10	A	G	G
3L	16502802	st	9239	intergenic	47	0.281437	12	G	A	G	0.54093	39.5808	3.14764e-10	2R	9755498	shot	shot-in	intronic	62	0.389937	10	A	G	G
3L	16502802	CG42513	CG42513-in	intronic	47	0.281437	12	G	A	G	0.54093	39.5808	3.14764e-10	2R	9755498	shot	shot-in	intronic	62	0.389937	10	A	G	G
2L	6047458	slmo	slmo-PD	synonymous	36	0.227848	13	C	T	C	-0.7205	39.5783	3.15163e-10	X	17207965	B-H2	-649	intergenic	31	0.197452	5	G	T	G
2L	6047458	CG34179	CG34179-u3	synonymous	36	0.227848	13	C	T	C	-0.7205	39.5783	3.15163e-10	X	17207965	B-H2	-649	intergenic	31	0.197452	5	G	T	G
3R	6105262	CG6293	-28722	intergenic	65	0.411392	12	A	C	C	0.72251	39.5686	3.16731e-10	3R	21819259	Nf1	Nf1-in	intronic	23	0.14375	17	C	T	C
3R	6105262	tRNA:S2b:86A	1405	intergenic	65	0.411392	12	A	C	C	0.72251	39.5686	3.16731e-10	3R	21819259	Nf1	Nf1-in	intronic	23	0.14375	17	C	T	C
3R	6105262	CG43143	CG43143-in	intronic	65	0.411392	12	A	C	C	0.72251	39.5686	3.16731e-10	3R	21819259	Nf1	Nf1-in	intronic	23	0.14375	17	C	T	C
3R	25987585	CG31030	-2829	intergenic	71	0.430303	10	T	C	T	0.51676	39.5577	3.18515e-10	2R	13661398	fab1	-71	intergenic	47	0.286585	15	C	A	C
3R	25987585	CG11498	1390	intergenic	71	0.430303	10	T	C	T	0.51676	39.5577	3.18515e-10	2R	13661398	fab1	-71	intergenic	47	0.286585	15	C	A	C
3L	22356974	CG11449	-90499	intergenic	40	0.254777	19	C	G	G	0.78322	39.5549	3.18958e-10	2L	14401341	elB	elB-in	intronic	17	0.103659	8	T	G	T
3L	22356974	CG32450	33197	intergenic	40	0.254777	19	C	G	G	0.78322	39.5549	3.18958e-10	2L	14401341	elB	elB-in	intronic	17	0.103659	8	T	G	T
3L	22356974	Ten-m	Ten-m-in	intronic	40	0.254777	19	C	G	G	0.78322	39.5549	3.18958e-10	2L	14401341	elB	elB-in	intronic	17	0.103659	8	T	G	T
3R	6237967	Irp-1B	Irp-1B-in	intronic	37	0.229814	18	G	A	G	-0.60276	39.5515	3.19514e-10	3R	9905828	foxo	foxo-in	intronic	79	0.49375	9	G	A	G
2L	4377153	Traf4	Traf4-in	intronic	33	0.203704	14	G	T	T	-0.69795	39.5315	3.2281e-10	2L	1694127	chinmo	chinmo-in	intronic	52	0.327044	13	A	G	G
2L	1694127	chinmo	chinmo-in	intronic	52	0.327044	13	A	G	G	-0.69795	39.5315	3.2281e-10	2L	4377153	Traf4	Traf4-in	intronic	33	0.203704	14	G	T	T
3R	12190084	CG14880	CG14880-in	intronic	62	0.3875	17	T	G	T	0.80177	39.5265	3.23632e-10	3L	8866127	dally	dally-in	intronic	15	0.0925926	12	A	G	A
3L	8894167	TrpA1	TrpA1-in	intronic	67	0.41358	9	T	C	T	0.71927	39.5165	3.25292e-10	2L	14401341	elB	elB-in	intronic	17	0.103659	8	T	G	T
2R	18615468	jbug	jbug-in	intronic	48	0.324324	7	G	C	C	-0.55716	39.4839	3.30779e-10	X	3044515	N	N-in	intronic	64	0.383234	13	C	T	C
3R	26076132	CG34299	CG34299:4	synonymous	40	0.25	12	C	T	T	0.61048	39.44	3.38287e-10	3L	8029383	nmo	nmo-in	intronic	45	0.277778	15	A	T	A
3R	24669062	Apc	Apc-in	intronic	28	0.178344	7	A	T	A	0.62705	39.4146	3.42721e-10	3R	15129761	Dl	Dl-u3	UTR	48	0.301887	15	A	T	A
2L	1575791	haf	haf-in	intronic	66	0.415094	15	G	C	G	-0.53564	39.3824	3.4842e-10	X	4362481	bi	bi-in	intronic	53	0.319277	10	C	A	A
3R	2677556	ftz	-12490	intergenic	17	0.10828	9	T	A	T	-0.85497	39.3628	3.51942e-10	3R	10550278	kibra	300	intergenic	48	0.3	16	A	C	A
3R	2677556	Scr	1853	intergenic	17	0.10828	9	T	A	T	-0.85497	39.3628	3.51942e-10	3R	10550278	kibra	300	intergenic	48	0.3	16	A	C	A
2R	6884570	luna	luna-in	intronic	23	0.141104	14	G	A	G	-0.88632	39.36	3.52445e-10	3L	8564785	rhea	rhea-in	intronic	20	0.121212	16	T	A	T
3L	11932944	Rpt4R	-2179	intergenic	32	0.193939	15	G	A	A	0.66438	39.3385	3.5634e-10	2R	14167732	sbb	sbb-in	intronic	35	0.221519	13	A	T	A
3L	11932944	CG14126	1504	intergenic	32	0.193939	15	G	A	A	0.66438	39.3385	3.5634e-10	2R	14167732	sbb	sbb-in	intronic	35	0.221519	13	A	T	A
3R	25284025	Ptp99A	Ptp99A-in	intronic	57	0.351852	13	C	A	C	-0.50581	39.3325	3.57436e-10	3L	8828921	dally	dally-in	intronic	70	0.419162	13	G	C	C
3L	8828921	dally	dally-in	intronic	70	0.419162	13	G	C	C	-0.50581	39.3325	3.57436e-10	3R	25284025	Ptp99A	Ptp99A-in	intronic	57	0.351852	13	C	A	C
3R	24669062	Apc	Apc-in	intronic	28	0.178344	7	A	T	A	0.63263	39.3151	3.60639e-10	3R	15129759	Dl	Dl-u3	UTR	48	0.301887	13	A	C	A
3L	12810900	CG42588	CG42588:2	synonymous	69	0.418182	20	C	T	T	-0.50591	39.3097	3.61644e-10	2L	5254966	tkv	tkv-in	intronic	58	0.3625	15	C	T	T
3R	17688050	lsn	-2872	intergenic	15	0.0898204	14	G	A	G	-0.78308	39.3051	3.62488e-10	2R	9768705	shot	shot:19	synonymous	59	0.355422	20	A	G	A
3R	17688071	lsn	-2851	intergenic	15	0.0903614	15	A	T	A	-0.78308	39.3051	3.62488e-10	2R	9768705	shot	shot:19	synonymous	59	0.355422	20	A	G	A
3R	17688050	glec	6066	intergenic	15	0.0898204	14	G	A	G	-0.78308	39.3051	3.62488e-10	2R	9768705	shot	shot:19	synonymous	59	0.355422	20	A	G	A
3R	17688071	glec	6087	intergenic	15	0.0903614	15	A	T	A	-0.78308	39.3051	3.62488e-10	2R	9768705	shot	shot:19	synonymous	59	0.355422	20	A	G	A
3L	16502776	CG12436	-19831	intergenic	50	0.310559	11	C	T	C	0.52623	39.3035	3.62794e-10	2R	9755498	shot	shot-in	intronic	62	0.389937	10	A	G	G
3L	16502776	st	9213	intergenic	50	0.310559	11	C	T	C	0.52623	39.3035	3.62794e-10	2R	9755498	shot	shot-in	intronic	62	0.389937	10	A	G	G
3L	16502776	CG42513	CG42513-in	intronic	50	0.310559	11	C	T	C	0.52623	39.3035	3.62794e-10	2R	9755498	shot	shot-in	intronic	62	0.389937	10	A	G	G
3R	12932887	cher	cher:15	synonymous	78	0.484472	17	A	T	A	0.55416	39.2983	3.63764e-10	2L	2901738	lilli	lilli-in	intronic	45	0.27439	19	C	T	C
3R	6950321	Ugt86Dd	-1995	intergenic	45	0.279503	9	T	G	G	0.72296	39.2908	3.65149e-10	3R	21871353	gro	gro:12	synonymous	29	0.18239	10	C	T	C
3R	6950321	CG6629	8893	intergenic	45	0.279503	9	T	G	G	0.72296	39.2908	3.65149e-10	3R	21871353	gro	gro:12	synonymous	29	0.18239	10	C	T	C
3L	22402131	CG11449	-45342	intergenic	46	0.292994	14	C	T	C	0.73715	39.2804	3.67107e-10	3R	10526627	kibra	kibra-in	intronic	29	0.177914	19	G	A	G
3L	22402131	CG32450	78354	intergenic	46	0.292994	14	C	T	C	0.73715	39.2804	3.67107e-10	3R	10526627	kibra	kibra-in	intronic	29	0.177914	19	G	A	G
3L	18316830	rpr	-73823	intergenic	27	0.164634	14	C	A	C	0.6662	39.2691	3.69247e-10	3L	20122275	gig	-7	intergenic	54	0.343949	16	T	C	T
3L	18316830	rpr	-73823	intergenic	27	0.164634	14	C	A	C	0.6662	39.2691	3.69247e-10	3L	20122275	gig	-7	intergenic	54	0.343949	16	T	C	T
3L	18316830	grim	19316	intergenic	27	0.164634	14	C	A	C	0.6662	39.2691	3.69247e-10	3L	20122275	gig	-7	intergenic	54	0.343949	16	T	C	T
3L	18316830	grim	19316	intergenic	27	0.164634	14	C	A	C	0.6662	39.2691	3.69247e-10	3L	20122275	gig	-7	intergenic	54	0.343949	16	T	C	T
3L	2422553	CG42669	CG42669-in	intronic	53	0.323171	10	G	A	G	0.52189	39.2606	3.70841e-10	X	7529303	ct	ct-in	intronic	67	0.411043	9	A	T	A
3R	19640003	CG33111	CG33111-in	synonymous	24	0.144578	17	C	T	C	0.78091	39.2564	3.71644e-10	2R	18138685	dve	dve-in	intronic	21	0.128834	18	C	G	C
3R	19640003	eIF4G2	eIF4G2-cds	synonymous	24	0.144578	17	C	T	C	0.78091	39.2564	3.71644e-10	2R	18138685	dve	dve-in	intronic	21	0.128834	18	C	G	C
2L	964007	ia2	-47414	intergenic	59	0.373418	12	C	T	T	0.50093	39.2408	3.74627e-10	2R	10447869	ttv	ttv-in	intronic	61	0.391026	7	A	G	A
2L	964007	CG4341	5909	intergenic	59	0.373418	12	C	T	T	0.50093	39.2408	3.74627e-10	2R	10447869	ttv	ttv-in	intronic	61	0.391026	7	A	G	A
X	17811284	CG6847	CG6847-in	intronic	46	0.278788	12	T	A	A	-0.54103	39.236	3.7556e-10	3R	26131349	hdc	hdc-in	intronic	61	0.371951	14	T	C	T
3L	10592051	CG42521	-24115	intergenic	61	0.378882	10	T	A	T	0.56999	39.2301	3.76691e-10	3R	17424201	InR	InR-in	intronic	47	0.288344	13	G	A	G
3L	10592051	CG42521	-24115	intergenic	61	0.378882	10	T	A	T	0.56999	39.2301	3.76691e-10	3R	17424201	InR	InR-in	intronic	47	0.288344	13	G	A	G
3L	10592051	CG6527	39869	intergenic	61	0.378882	10	T	A	T	0.56999	39.2301	3.76691e-10	3R	17424201	InR	InR-in	intronic	47	0.288344	13	G	A	G
3L	10592051	CG6527	39869	intergenic	61	0.378882	10	T	A	T	0.56999	39.2301	3.76691e-10	3R	17424201	InR	InR-in	intronic	47	0.288344	13	G	A	G
2R	6892699	luna	luna-in	intronic	35	0.214724	10	C	A	C	0.62176	39.2036	3.81841e-10	3L	5799110	S6k	S6k:8	synonymous	57	0.351852	14	G	A	G
2R	6892699	luna	luna-in	intronic	35	0.214724	10	C	A	C	0.62176	39.2036	3.81841e-10	3L	5799110	S6k	S6k:8	synonymous	57	0.351852	14	G	A	G
2L	15635340	CG4587	-12495	intergenic	46	0.296774	12	G	T	T	-0.73543	39.1946	3.83599e-10	2R	9897182	mam	mam-in	intronic	20	0.124224	8	G	A	G
2L	15635340	CG18480	2722	intergenic	46	0.296774	12	G	T	T	-0.73543	39.1946	3.83599e-10	2R	9897182	mam	mam-in	intronic	20	0.124224	8	G	A	G
2L	9315372	CG17005	-12372	intergenic	45	0.286624	15	C	A	C	-0.67536	39.1899	3.84524e-10	2L	14401260	elB	elB-in	intronic	23	0.144654	11	G	A	G
2L	9315372	CG42844	10365	intergenic	45	0.286624	15	C	A	C	-0.67536	39.1899	3.84524e-10	2L	14401260	elB	elB-in	intronic	23	0.144654	11	G	A	G
2R	14264391	CG42736	-601	intergenic	43	0.259036	16	A	T	T	-0.56157	39.1797	3.86542e-10	3R	17012811	SNF4Agamma	SNF4Agamma-in	intronic	76	0.481013	12	T	A	T
2R	14264391	Tango8	64888	intergenic	43	0.259036	16	A	T	T	-0.56157	39.1797	3.86542e-10	3R	17012811	SNF4Agamma	SNF4Agamma-in	intronic	76	0.481013	12	T	A	T
2L	9678992	Pka-C1	-3323	intergenic	28	0.175	13	G	A	G	0.73186	39.1769	3.87083e-10	2L	14401341	elB	elB-in	intronic	17	0.103659	8	T	G	T
2L	9678992	CG33299	21645	intergenic	28	0.175	13	G	A	G	0.73186	39.1769	3.87083e-10	2L	14401341	elB	elB-in	intronic	17	0.103659	8	T	G	T
2R	10608264	CG12865	-17960	intergenic	50	0.308642	7	A	C	C	-0.57311	39.1735	3.87776e-10	3R	16447236	H	-429	intergenic	43	0.284768	7	G	A	G
2R	10608264	CG12865	-17960	intergenic	50	0.308642	7	A	C	C	-0.57311	39.1735	3.87776e-10	3R	16447236	H	-429	intergenic	43	0.284768	7	G	A	G
2R	10608264	CG30480	42626	intergenic	50	0.308642	7	A	C	C	-0.57311	39.1735	3.87776e-10	3R	16447236	H	-429	intergenic	43	0.284768	7	G	A	G
2R	10608264	CG30480	42626	intergenic	50	0.308642	7	A	C	C	-0.57311	39.1735	3.87776e-10	3R	16447236	H	-429	intergenic	43	0.284768	7	G	A	G
2R	10802755	CG10249	CG10249-in	intronic	38	0.245161	6	A	G	A	0.77566	39.1659	3.89281e-10	3R	12890097	Dad	Dad-in	intronic	27	0.162651	13	T	A	T
2L	268283	CG3345	-805	intergenic	59	0.36646	16	A	T	T	-0.5141	39.1452	3.93422e-10	3L	8860204	dally	dally-in	intronic	39	0.278571	10	A	G	A
2L	268283	CG17075	1595	intergenic	59	0.36646	16	A	T	T	-0.5141	39.1452	3.93422e-10	3L	8860204	dally	dally-in	intronic	39	0.278571	10	A	G	A
2L	268283	CG3645	CG3645-in	intronic	59	0.36646	16	A	T	T	-0.5141	39.1452	3.93422e-10	3L	8860204	dally	dally-in	intronic	39	0.278571	10	A	G	A
3R	23632006	CG34353	CG34353-in	intronic	39	0.240741	16	G	A	G	0.68214	39.1245	3.97626e-10	3R	26179528	hdc	hdc-in	intronic	29	0.176829	13	G	A	A
3L	10444698	Gem3	-8023	intergenic	57	0.354037	8	T	A	A	-0.69534	39.1097	4.00652e-10	3R	9892096	foxo	foxo-in	intronic	28	0.173913	8	C	T	C
3L	10444698	Ir67c	17493	intergenic	57	0.354037	8	T	A	A	-0.69534	39.1097	4.00652e-10	3R	9892096	foxo	foxo-in	intronic	28	0.173913	8	C	T	C
3R	2676945	ftz	-13101	intergenic	13	0.08125	7	A	C	A	0.81568	39.1055	4.01506e-10	3R	17874146	how	how-in	intronic	77	0.49359	20	T	G	T
3R	2676945	Scr	1242	intergenic	13	0.08125	7	A	C	A	0.81568	39.1055	4.01506e-10	3R	17874146	how	how-in	intronic	77	0.49359	20	T	G	T
X	6011515	Ca-alpha1T	Ca-alpha1T-in	intronic	58	0.379085	8	T	A	T	0.49651	39.1054	4.01521e-10	3L	8831345	dally	dally-in	synonymous	77	0.461078	17	G	A	A
2L	907260	GluRIIC	-6830	intergenic	42	0.264151	17	A	T	A	0.56719	39.0978	4.03092e-10	X	2579371	per	-242	intergenic	69	0.420732	12	A	G	G
2L	907260	snRNA:U1:21D	5598	intergenic	42	0.264151	17	A	T	A	0.56719	39.0978	4.03092e-10	X	2579371	per	-242	intergenic	69	0.420732	12	A	G	G
3R	12645228	abd-A	abd-A-in	intronic	61	0.388535	15	G	T	T	0.52676	39.0974	4.03173e-10	2R	13661404	fab1	-65	intergenic	48	0.289157	16	T	C	T
3L	18081987	CG13698	-222	intergenic	37	0.232704	11	A	T	A	-0.69403	39.096	4.03461e-10	2R	16712646	insc	insc-in	intronic	39	0.239264	17	A	C	C
3L	18081987	CG34253	1571	intergenic	37	0.232704	11	A	T	A	-0.69403	39.096	4.03461e-10	2R	16712646	insc	insc-in	intronic	39	0.239264	17	A	C	C
3R	18642324	CG4704	-27590	intergenic	61	0.383648	14	A	G	G	0.56978	39.0794	4.06911e-10	3L	8846490	dally	dally-in	intronic	42	0.251497	15	T	C	T
3R	18642324	CG13840	373	intergenic	61	0.383648	14	A	G	G	0.56978	39.0794	4.06911e-10	3L	8846490	dally	dally-in	intronic	42	0.251497	15	T	C	T
3R	12190084	CG14880	CG14880-in	intronic	62	0.3875	17	T	G	T	0.77701	39.0775	4.07311e-10	3L	8866133	dally	dally-in	intronic	18	0.109091	12	G	A	G
2L	4024761	ed	-6618	intergenic	65	0.411392	12	C	T	T	0.5129	39.0765	4.07529e-10	X	4334522	bi	bi-in	intronic	49	0.29697	13	G	A	G
2L	4024761	CG10039	15762	intergenic	65	0.411392	12	C	T	T	0.5129	39.0765	4.07529e-10	X	4334522	bi	bi-in	intronic	49	0.29697	13	G	A	G
3R	25970045	CG15529	-7739	intergenic	29	0.18239	14	G	C	C	0.69156	39.0531	4.12438e-10	3R	26184796	hdc	hdc-in	intronic	40	0.248447	10	T	C	T
3R	25970045	AdoR	5798	intergenic	29	0.18239	14	G	C	C	0.69156	39.0531	4.12438e-10	3R	26184796	hdc	hdc-in	intronic	40	0.248447	10	T	C	T
2L	6704989	Tsp	Tsp-in	intronic	67	0.421384	12	G	A	A	0.48594	39.0498	4.13129e-10	3R	25253789	Ptp99A	Ptp99A-in	intronic	57	0.360759	15	T	G	T
3L	2229194	osm-1	-452	intergenic	62	0.373494	12	G	A	G	0.48026	39.0236	4.18718e-10	3L	7993412	nmo	nmo-in	RNA	75	0.457317	15	G	C	G
3L	2229194	CG15878	16691	intergenic	62	0.373494	12	G	A	G	0.48026	39.0236	4.18718e-10	3L	7993412	nmo	nmo-in	RNA	75	0.457317	15	G	C	G
3L	11103453	CG7638	CG7638:2	synonymous	58	0.353659	16	A	G	A	-0.51501	39.0099	4.21674e-10	2R	17424221	Egfr	Egfr-in	missense	63	0.388889	20	T	C	T
3L	11103453	CG7638	CG7638:2	synonymous	58	0.353659	16	A	G	A	-0.51501	39.0099	4.21674e-10	2R	17424221	Egfr	Egfr-in	missense	63	0.388889	20	T	C	T
2L	2290461	robl22E	robl22E-PA	synonymous	37	0.237179	15	C	A	A	0.60008	38.99	4.25984e-10	2L	12511384	bun	bun-in	intronic	75	0.477707	18	A	G	G
2L	2290461	robl22E	robl22E-PA	synonymous	37	0.237179	15	C	A	A	0.60008	38.99	4.25984e-10	2L	12511384	bun	bun-in	intronic	75	0.477707	18	A	G	G
3R	17688055	lsn	-2867	intergenic	14	0.0853659	15	A	T	A	-0.78365	38.9829	4.27531e-10	2R	9768705	shot	shot:19	synonymous	59	0.355422	20	A	G	A
3R	17688055	glec	6071	intergenic	14	0.0853659	15	A	T	A	-0.78365	38.9829	4.27531e-10	2R	9768705	shot	shot:19	synonymous	59	0.355422	20	A	G	A
3L	8540502	rhea	rhea-in	intergenic	39	0.237805	10	A	G	A	-0.6538	38.9715	4.30036e-10	3R	12127274	gish	gish-in	intronic	42	0.269231	14	A	G	A
2L	12320591	CG31862	-18279	intergenic	43	0.294521	20	T	C	T	-0.63101	38.9697	4.30443e-10	2L	10819299	Nos	Nos-in	synonymous	33	0.203704	20	A	C	A
2L	12320591	CG31759	110481	intergenic	43	0.294521	20	T	C	T	-0.63101	38.9697	4.30443e-10	2L	10819299	Nos	Nos-in	synonymous	33	0.203704	20	A	C	A
3R	12932887	cher	cher:15	synonymous	78	0.484472	17	A	T	A	0.55668	38.9635	4.31801e-10	2L	2902343	lilli	lilli-in	intronic	47	0.29375	15	A	C	A
3R	17415969	InR	InR-in	intronic	78	0.496815	19	G	A	A	-0.49124	38.9517	4.3443e-10	3R	26117489	hdc	hdc-in	intronic	74	0.465409	12	G	C	C
3R	26117489	hdc	hdc-in	intronic	74	0.465409	12	G	C	C	-0.49124	38.9517	4.3443e-10	3R	17415969	InR	InR-in	intronic	78	0.496815	19	G	A	A
3R	26117489	hdc	hdc-in	intronic	74	0.465409	12	G	C	C	-0.49124	38.9517	4.3443e-10	3R	17415969	InR	InR-in	intronic	78	0.496815	19	G	A	A
3R	26970792	Gycbeta100B	Gycbeta100B-in	intronic	32	0.203822	6	A	G	A	0.7405	38.9122	4.43292e-10	3R	21871353	gro	gro:12	synonymous	29	0.18239	10	C	T	C
X	20825604	Ser6	-8026	intergenic	71	0.427711	12	C	A	C	-0.53317	38.899	4.46302e-10	2L	2893156	lilli	lilli-in	intronic	46	0.292994	11	G	A	G
X	20825604	Npc1b	15196	intergenic	71	0.427711	12	C	A	C	-0.53317	38.899	4.46302e-10	2L	2893156	lilli	lilli-in	intronic	46	0.292994	11	G	A	G
2R	18615457	jbug	jbug-in	intronic	45	0.290323	12	G	A	A	-0.58319	38.8983	4.46477e-10	X	3044524	N	N-in	intronic	63	0.379518	12	A	C	A
2L	3296957	CG9663	CG9663:5	missense	58	0.3625	17	A	G	A	-0.56259	38.896	4.47001e-10	2L	14397824	elB	elB-in	intronic	28	0.189189	8	G	T	G
3L	9762709	CG8177	CG8177-in	intronic	64	0.392638	13	G	T	T	-0.52341	38.888	4.48828e-10	3L	8843203	dally	dally-in	intronic	41	0.248485	19	A	G	G
3L	11393890	CG7560	-24360	intergenic	54	0.335404	13	A	T	A	0.69368	38.881	4.50443e-10	3L	8858798	dally	dally-in	intronic	26	0.154762	15	G	A	G
3L	11393890	CG11726	5117	intergenic	54	0.335404	13	A	T	A	0.69368	38.881	4.50443e-10	3L	8858798	dally	dally-in	intronic	26	0.154762	15	G	A	G
X	4279781	CG32773	-2084	intergenic	67	0.435065	4	G	A	A	0.81015	38.8755	4.51706e-10	2L	14401341	elB	elB-in	intronic	17	0.103659	8	T	G	T
X	4279781	CG12688	2579	intergenic	67	0.435065	4	G	A	A	0.81015	38.8755	4.51706e-10	2L	14401341	elB	elB-in	intronic	17	0.103659	8	T	G	T
3R	5212272	Fps85D	Fps85D-in	intronic	28	0.171779	11	G	A	G	-0.70468	38.8748	4.51868e-10	3L	12584878	ara	ara-in	intronic	37	0.224242	12	T	G	G
2R	7106776	Syx6	-270	intergenic	54	0.339623	15	C	T	C	-0.67473	38.8748	4.51881e-10	3R	26630908	wts	wts-in	intronic	30	0.182927	13	C	G	C
2R	7106776	Syx6	-270	intergenic	54	0.339623	15	C	T	C	-0.67473	38.8748	4.51881e-10	3R	26630908	wts	wts-in	intronic	30	0.182927	13	C	G	C
2R	7106776	CG9084	58	intergenic	54	0.339623	15	C	T	C	-0.67473	38.8748	4.51881e-10	3R	26630908	wts	wts-in	intronic	30	0.182927	13	C	G	C
2R	7106776	CG9084	58	intergenic	54	0.339623	15	C	T	C	-0.67473	38.8748	4.51881e-10	3R	26630908	wts	wts-in	intronic	30	0.182927	13	C	G	C
X	6504921	pigs	pigs-in	intronic	69	0.418182	10	A	G	G	0.76058	38.8703	4.52921e-10	2L	14401341	elB	elB-in	intronic	17	0.103659	8	T	G	T
3R	18642306	CG4704	-27608	intergenic	59	0.373418	11	A	G	G	0.56074	38.8699	4.5301e-10	3L	8846490	dally	dally-in	intronic	42	0.251497	15	T	C	T
3R	18642306	CG13840	355	intergenic	59	0.373418	11	A	G	G	0.56074	38.8699	4.5301e-10	3L	8846490	dally	dally-in	intronic	42	0.251497	15	T	C	T
3L	3121906	prominin-like	prominin-like-in	intronic	80	0.479042	16	G	C	C	0.5069	38.8603	4.55242e-10	3R	1011298	cno	cno-in	intronic	63	0.406452	17	G	C	G
3L	3121906	prominin-like	prominin-like-in	intronic	80	0.479042	16	G	C	C	0.5069	38.8603	4.55242e-10	3R	1011301	cno	cno-in	intronic	63	0.406452	18	G	T	G
2L	14401341	elB	elB-in	intronic	17	0.103659	8	T	G	T	-0.74095	38.8486	4.57977e-10	2L	651725	ds	ds-in	intronic	71	0.440994	13	C	T	C
2L	14401341	elB	elB-in	intronic	17	0.103659	8	T	G	T	-0.74095	38.8486	4.57977e-10	2L	651725	ds	ds-in	intronic	71	0.440994	13	C	T	C
2L	651725	ds	ds-in	intronic	71	0.440994	13	C	T	C	-0.74095	38.8486	4.57977e-10	2L	14401341	elB	elB-in	intronic	17	0.103659	8	T	G	T
3R	25364912	Dr	-17197	intergenic	70	0.4375	16	C	T	T	0.64257	38.8437	4.59137e-10	2R	10914924	hbs	hbs-in	intronic	34	0.208589	13	C	G	C
3R	25364912	CG2014	22663	intergenic	70	0.4375	16	C	T	T	0.64257	38.8437	4.59137e-10	2R	10914924	hbs	hbs-in	intronic	34	0.208589	13	C	G	C
2L	18234020	CG31788	-23474	intergenic	49	0.314103	19	G	T	T	0.61552	38.8321	4.61861e-10	2R	16712646	insc	insc-in	intronic	39	0.239264	17	A	C	C
2L	18234020	CG31802	24783	intergenic	49	0.314103	19	G	T	T	0.61552	38.8321	4.61861e-10	2R	16712646	insc	insc-in	intronic	39	0.239264	17	A	C	C
2L	18234020	CG42750	CG42750-in	intergenic	49	0.314103	19	G	T	T	0.61552	38.8321	4.61861e-10	2R	16712646	insc	insc-in	intronic	39	0.239264	17	A	C	C
3R	14083054	moi	moi-u3	synonymous	68	0.425	15	G	C	G	0.65693	38.8306	4.62221e-10	2L	4060119	ed	ed-in	intronic	28	0.171779	14	C	T	C
3R	14083054	tatl	tatl-PB	synonymous	68	0.425	15	G	C	G	0.65693	38.8306	4.62221e-10	2L	4060119	ed	ed-in	intronic	28	0.171779	14	C	T	C
3R	14083054	moi	moi-u3	synonymous	68	0.425	15	G	C	G	0.65693	38.8306	4.62221e-10	2L	4060119	ed	ed-in	intronic	28	0.171779	14	C	T	C
3R	14083054	tatl	tatl-PB	synonymous	68	0.425	15	G	C	G	0.65693	38.8306	4.62221e-10	2L	4060119	ed	ed-in	intronic	28	0.171779	14	C	T	C
2L	9329332	CG17005	CG17005:5	synonymous	67	0.421384	17	C	T	C	-0.70769	38.83	4.62368e-10	2L	14401341	elB	elB-in	intronic	17	0.103659	8	T	G	T
2R	18615468	jbug	jbug-in	intronic	48	0.324324	7	G	C	C	-0.55816	38.7886	4.72271e-10	X	3044517	N	N-in	intronic	63	0.379518	13	A	T	A
X	13968887	tRNA:S4:12Ee	-28509	intergenic	67	0.408537	7	G	A	G	-0.69896	38.7784	4.74746e-10	2L	14401341	elB	elB-in	intronic	17	0.103659	8	T	G	T
X	13968887	tRNA:S474:12Eh	4132	intergenic	67	0.408537	7	G	A	G	-0.69896	38.7784	4.74746e-10	2L	14401341	elB	elB-in	intronic	17	0.103659	8	T	G	T
2R	15226174	CG9975	-3140	intergenic	49	0.316129	8	T	C	T	0.60266	38.7669	4.7756e-10	2L	5267116	tkv	tkv-in	synonymous	25	0.153374	11	A	G	G
2R	15226174	CG34045	3481	intergenic	49	0.316129	8	T	C	T	0.60266	38.7669	4.7756e-10	2L	5267116	tkv	tkv-in	synonymous	25	0.153374	11	A	G	G
X	17811293	CG6847	CG6847-in	intronic	47	0.281437	11	C	T	T	-0.52875	38.752	4.8122e-10	3R	26131349	hdc	hdc-in	intronic	61	0.371951	14	T	C	T
3L	8618862	Zasp66	Zasp66-in	intronic	46	0.280488	22	A	G	A	0.62771	38.7491	4.81938e-10	3R	21871353	gro	gro:12	synonymous	29	0.18239	10	C	T	C
3L	18075392	CG34253	-4099	intergenic	64	0.390244	14	T	G	T	-0.62756	38.7408	4.83997e-10	2L	4060207	ed	ed-in	intronic	31	0.189024	13	A	T	A
3L	18075392	CG34253	-4099	intergenic	64	0.390244	14	T	G	T	-0.62756	38.7408	4.83997e-10	2L	4060207	ed	ed-in	intronic	31	0.189024	13	A	T	A
3L	18075392	CG34252	8910	intergenic	64	0.390244	14	T	G	T	-0.62756	38.7408	4.83997e-10	2L	4060207	ed	ed-in	intronic	31	0.189024	13	A	T	A
3L	18075392	CG34252	8910	intergenic	64	0.390244	14	T	G	T	-0.62756	38.7408	4.83997e-10	2L	4060207	ed	ed-in	intronic	31	0.189024	13	A	T	A
2R	16298496	CG12484	-13344	intergenic	61	0.38125	11	A	C	A	-0.52987	38.734	4.85667e-10	3L	8843203	dally	dally-in	intronic	41	0.248485	19	A	G	G
2R	16298496	CG11192	55938	intergenic	61	0.38125	11	A	C	A	-0.52987	38.734	4.85667e-10	3L	8843203	dally	dally-in	intronic	41	0.248485	19	A	G	G
X	8086407	sdt	sdt-in	intronic	79	0.478788	10	T	G	G	0.64313	38.7263	4.87589e-10	3R	26630908	wts	wts-in	intronic	30	0.182927	13	C	G	C
X	8086407	sdt	sdt-in	intronic	79	0.478788	10	T	G	G	0.64313	38.7263	4.87589e-10	3R	26630908	wts	wts-in	intronic	30	0.182927	13	C	G	C
X	2694458	CG12498	-9456	intergenic	78	0.478528	5	A	C	C	0.51633	38.7083	4.92113e-10	3R	16370699	Stat92E	Stat92E-in	intronic	45	0.28125	16	T	G	G
X	2694458	w	3959	intergenic	78	0.478528	5	A	C	C	0.51633	38.7083	4.92113e-10	3R	16370699	Stat92E	Stat92E-in	intronic	45	0.28125	16	T	G	G
3R	10951276	CG42788	CG42788-in	intronic	54	0.335404	10	G	A	A	-0.5841	38.7045	4.9307e-10	3R	17001907	SNF4Agamma	SNF4Agamma-in	intronic	40	0.254777	13	A	G	A
3L	19130269	fz2	-5729	intergenic	43	0.263804	10	T	A	A	0.55099	38.6964	4.95119e-10	3L	12610328	caup	caup:2	synonymous	70	0.432099	12	T	C	T
3L	19130269	Spn75F	7504	intergenic	43	0.263804	10	T	A	A	0.55099	38.6964	4.95119e-10	3L	12610328	caup	caup:2	synonymous	70	0.432099	12	T	C	T
3L	7855453	Pdp1	Pdp1-in	intronic	38	0.228916	13	G	A	A	-0.61351	38.6941	4.95715e-10	2R	17426933	Egfr	Egfr-in	intronic	44	0.271605	11	T	C	T
3L	7855453	Pdp1	Pdp1-in	intronic	38	0.228916	13	G	A	A	-0.61351	38.6941	4.95715e-10	2R	17426933	Egfr	Egfr-in	intronic	44	0.271605	11	T	C	T
2R	12262247	CG33960	-11806	intergenic	70	0.432099	12	T	C	C	0.52122	38.6859	4.9779e-10	3L	13266279	caps	caps-in	intronic	50	0.310559	12	C	A	C
2R	12262247	CG15711	10435	intergenic	70	0.432099	12	T	C	C	0.52122	38.6859	4.9779e-10	3L	13266279	caps	caps-in	intronic	50	0.310559	12	C	A	C
3L	1170960	bab2	bab2-in	intronic	24	0.143713	14	G	A	G	-0.72979	38.6687	5.02196e-10	3L	8557221	rhea	rhea-in	intronic	47	0.281437	18	A	G	G
3R	27275416	Gprk2	Gprk2-in	intronic	40	0.25	11	A	G	G	0.51078	38.6511	5.0675e-10	3L	5825939	vn	vn-in	intronic	82	0.493976	18	A	T	A
3R	22979292	Mdh	Mdh-in	intronic	23	0.140244	10	T	C	T	0.6654	38.6459	5.08096e-10	3L	8465348	Gug	Gug-u3	UTR	78	0.472727	10	C	T	T
3L	2600667	CG16986	CG16986-in	intergenic	57	0.377483	8	G	A	G	0.76464	38.6406	5.0947e-10	2L	14401341	elB	elB-in	intronic	17	0.103659	8	T	G	T
3R	9114210	CG15887	CG15887-in	intronic	47	0.299363	15	T	C	T	0.64396	38.6209	5.14655e-10	3R	20478904	ash2	ash2-cds	synonymous	32	0.198758	20	T	C	T
3R	12331253	CG42342	CG42342-in	intronic	29	0.184713	7	C	G	C	-0.66635	38.6099	5.17569e-10	3L	13251533	caps	caps-in	intronic	63	0.398734	7	A	C	A
2R	11068278	igl	igl-in	intronic	37	0.228395	11	G	A	G	0.62183	38.6003	5.20111e-10	3L	8008089	nmo	nmo-in	intronic	56	0.339394	6	G	T	T
2L	1609740	CG31935	CG31935-in	intronic	67	0.41358	22	C	G	C	-0.63089	38.5869	5.23692e-10	2L	14401260	elB	elB-in	intronic	23	0.144654	11	G	A	G
2R	6884809	luna	luna-in	intronic	23	0.139394	21	C	T	C	-0.77409	38.5726	5.27548e-10	X	18460246	Bx	Bx-in	intronic	47	0.290123	9	A	G	G
3R	4479017	CG11753	CG11753-in	intronic	45	0.283019	25	A	G	A	-0.58479	38.5629	5.30172e-10	X	2586220	per	per-in	intronic	42	0.25	21	G	T	T
3L	15605038	CG13449	CG13449:4	synonymous	57	0.347561	15	T	G	G	-0.66888	38.55	5.33683e-10	3L	8869598	dally	dally-in	intronic	28	0.168675	11	A	G	A
2R	19175252	Prosbeta5R	-20925	intergenic	30	0.180723	14	T	C	T	0.62642	38.5401	5.36409e-10	3R	1020349	cno	cno-in	intronic	68	0.43871	19	G	C	C
2R	19175252	CG13541	2453	intergenic	30	0.180723	14	T	C	T	0.62642	38.5401	5.36409e-10	3R	1020349	cno	cno-in	intronic	68	0.43871	19	G	C	C
3R	19435020	CG31145	CG31145-in	intronic	31	0.191358	10	C	G	C	0.66911	38.5329	5.38377e-10	2R	13701342	grh	grh-in	intronic	55	0.333333	11	G	A	A
3R	17204962	tin	tin-u5	UTR	40	0.246914	24	A	T	A	0.59427	38.5316	5.38742e-10	3L	8030300	nmo	nmo-in	intronic	69	0.428571	11	T	C	C
2L	882880	CG15824	CG15824:7	synonymous	60	0.37037	17	A	C	A	0.51751	38.5276	5.39848e-10	2L	4097462	ed	ed-in	intronic	70	0.4375	10	C	T	T
2L	882880	CG15824	CG15824:7	synonymous	60	0.37037	17	A	C	A	0.51751	38.5276	5.39848e-10	2L	4097462	ed	ed-in	intronic	70	0.4375	10	C	T	T
3R	8354259	Octbeta3R	Octbeta3R-in	intronic	65	0.403727	12	A	T	A	-0.50304	38.4975	5.48238e-10	2R	9771837	shot	shot:21	missense	79	0.496855	16	A	G	A
3R	8354259	hug	hug-in	intronic	65	0.403727	12	A	T	A	-0.50304	38.4975	5.48238e-10	2R	9771837	shot	shot:21	missense	79	0.496855	16	A	G	A
X	1627075	Scgdelta	-12834	intergenic	38	0.227545	14	T	A	T	-0.61288	38.4822	5.52548e-10	2R	18039441	a	a-in	intronic	52	0.33121	17	T	C	T
X	1627075	CG3795	22879	intergenic	38	0.227545	14	T	A	T	-0.61288	38.4822	5.52548e-10	2R	18039441	a	a-in	intronic	52	0.33121	17	T	C	T
3L	8894171	TrpA1	TrpA1-in	intronic	67	0.411043	9	A	G	A	0.68961	38.4709	5.55774e-10	2L	14401341	elB	elB-in	intronic	17	0.103659	8	T	G	T
2R	7106772	Syx6	-274	intergenic	55	0.341615	13	C	G	C	-0.67729	38.4512	5.61389e-10	3R	26630908	wts	wts-in	intronic	30	0.182927	13	C	G	C
2R	7106772	Syx6	-274	intergenic	55	0.341615	13	C	G	C	-0.67729	38.4512	5.61389e-10	3R	26630908	wts	wts-in	intronic	30	0.182927	13	C	G	C
2R	7106772	CG9084	54	intergenic	55	0.341615	13	C	G	C	-0.67729	38.4512	5.61389e-10	3R	26630908	wts	wts-in	intronic	30	0.182927	13	C	G	C
2R	7106772	CG9084	54	intergenic	55	0.341615	13	C	G	C	-0.67729	38.4512	5.61389e-10	3R	26630908	wts	wts-in	intronic	30	0.182927	13	C	G	C
2L	10567011	Trim9	Trim9-in	intronic	52	0.322981	18	T	G	T	-0.53017	38.4456	5.63008e-10	2L	2449447	dpp	dpp-u5	UTR	61	0.38125	22	C	T	T
2L	3780685	bowl	bowl-in	intronic	70	0.443038	19	G	A	G	-0.70237	38.439	5.6493e-10	2L	14401341	elB	elB-in	intronic	17	0.103659	8	T	G	T
2R	16168437	CG9090	CG9090-in	intronic	50	0.3125	17	A	G	G	0.50658	38.4385	5.6506e-10	3L	14331242	fz	fz-in	intronic	68	0.42236	17	C	G	C
2R	19631966	egl	egl-cds	synonymous	64	0.392638	12	C	T	T	-0.51853	38.4367	5.65597e-10	2R	1609728	ap	ap-in	intronic	70	0.44586	8	T	A	A
3R	22851294	CG6271	CG6271-PA	synonymous	34	0.216561	13	G	A	A	-0.76342	38.4314	5.67138e-10	2R	7088567	shn	shn-in	intronic	23	0.140244	8	G	A	G
3L	5430393	CG34391	CG34391-in	intronic	54	0.325301	13	G	T	T	-0.63556	38.4311	5.67217e-10	X	18457904	Bx	Bx-in	intronic	30	0.179641	16	G	A	G
X	1485824	br	br-in	intergenic	57	0.339286	16	T	C	T	0.61315	38.4228	5.69644e-10	2L	378200	al	al-u5	UTR	35	0.212121	19	C	T	C
X	1485824	Mur2B	Mur2B-in	intergenic	57	0.339286	16	T	C	T	0.61315	38.4228	5.69644e-10	2L	378200	al	al-u5	UTR	35	0.212121	19	C	T	C
2R	17343969	Sdc	Sdc-in	intronic	25	0.151515	15	T	A	T	-0.76731	38.422	5.69853e-10	3L	14286103	fz	fz-in	intronic	52	0.315152	10	G	T	G
2L	5134617	Msp-300	Msp-300-cds	synonymous	35	0.22293	25	A	T	A	-0.62804	38.4075	5.74115e-10	2R	17253208	cv-2	cv-2-in	intronic	67	0.435065	6	G	A	A
3L	13591132	bru-3	bru-3-in		2	0.0266667	1	T	C	T	0.52909	38.4042	5.7507e-10	3R	11859159	pnr	pnr-in	intronic	49	0.312102	10	A	G	A
3R	23304365	Cyp6a18	-34	intergenic	76	0.477987	13	A	T	A	0.66458	38.4017	5.75817e-10	2L	12505897	bun	bun-in	intronic	24	0.152866	17	G	A	G
3R	23304365	Cyp6a18	-34	intergenic	76	0.477987	13	A	T	A	0.66458	38.4017	5.75817e-10	2L	12505897	bun	bun-in	intronic	24	0.152866	17	G	A	G
3R	23304365	CG13978	11640	intergenic	76	0.477987	13	A	T	A	0.66458	38.4017	5.75817e-10	2L	12505897	bun	bun-in	intronic	24	0.152866	17	G	A	G
3R	23304365	CG13978	11640	intergenic	76	0.477987	13	A	T	A	0.66458	38.4017	5.75817e-10	2L	12505897	bun	bun-in	intronic	24	0.152866	17	G	A	G
3L	2091884	zormin	-25582	intergenic	49	0.29697	19	C	T	C	-0.52123	38.386	5.80471e-10	X	2373051	trol	trol-in	intronic	73	0.439759	9	C	T	C
3L	2091884	CR42860	2258	intergenic	49	0.29697	19	C	T	C	-0.52123	38.386	5.80471e-10	X	2373051	trol	trol-in	intronic	73	0.439759	9	C	T	C
3L	2091884	sls	sls:26	missense	49	0.29697	19	C	T	C	-0.52123	38.386	5.80471e-10	X	2373051	trol	trol-in	intronic	73	0.439759	9	C	T	C
2L	13912224	Acyp	Acyp-PA	synonymous	35	0.213415	14	C	T	C	-0.71794	38.3653	5.86675e-10	X	18457812	Bx	Bx-in	intronic	29	0.176829	12	A	G	A
2L	13912224	Acyp	Acyp-PA	synonymous	35	0.213415	14	C	T	C	-0.71794	38.3653	5.86675e-10	X	18457816	Bx	Bx-in	intronic	30	0.181818	11	C	T	C
3R	22554636	CG14246	CG14246-in	missense	15	0.0920245	13	T	A	T	-0.74283	38.3653	5.86678e-10	2L	7940369	Snoo	Snoo-in	intronic	65	0.419355	9	T	C	C
3R	22554636	CG14245	CG14245-PA	missense	15	0.0920245	13	T	A	T	-0.74283	38.3653	5.86678e-10	2L	7940369	Snoo	Snoo-in	intronic	65	0.419355	9	T	C	C
3L	6343911	CG13300	CG13300-in	UTR	78	0.4875	7	A	G	A	-0.7006	38.3391	5.94596e-10	2L	14401341	elB	elB-in	intronic	17	0.103659	8	T	G	T
3L	6343911	Sfp65A	Sfp65A-u3	UTR	78	0.4875	7	A	G	A	-0.7006	38.3391	5.94596e-10	2L	14401341	elB	elB-in	intronic	17	0.103659	8	T	G	T
2R	10692854	kn	kn-in	intronic	32	0.195122	21	G	A	G	-0.80168	38.321	6.00123e-10	2L	698452	ds	ds-in	intronic	40	0.251572	12	T	C	C
2R	10692854	kn	kn-in	intronic	32	0.195122	21	G	A	G	-0.80168	38.321	6.00123e-10	2L	698452	ds	ds-in	intronic	40	0.251572	12	T	C	C
3L	12686244	mirr	-604	intergenic	66	0.4	12	G	A	G	0.47123	38.3109	6.03259e-10	3L	1466894	rho	rho:3	synonymous	70	0.421687	19	A	C	C
3L	12686244	CG32111	44864	intergenic	66	0.4	12	G	A	G	0.47123	38.3109	6.03259e-10	3L	1466894	rho	rho:3	synonymous	70	0.421687	19	A	C	C
3L	13889866	Rgl	-10125	intergenic	47	0.29375	11	A	G	G	-0.53705	38.3094	6.03707e-10	2L	437032	ex	ex-in	intronic	75	0.46875	16	G	A	G
3L	13889866	CG13737	13730	intergenic	47	0.29375	11	A	G	G	-0.53705	38.3094	6.03707e-10	2L	437032	ex	ex-in	intronic	75	0.46875	16	G	A	G
3L	13889866	CG34400	CG34400-in	intronic	47	0.29375	11	A	G	G	-0.53705	38.3094	6.03707e-10	2L	437032	ex	ex-in	intronic	75	0.46875	16	G	A	G
3L	18075392	CG34253	-4099	intergenic	64	0.390244	14	T	G	T	-0.62451	38.309	6.03849e-10	2L	4060120	ed	ed-in	intronic	29	0.175758	15	G	A	G
3L	18075392	CG34253	-4099	intergenic	64	0.390244	14	T	G	T	-0.62451	38.309	6.03849e-10	2L	4060120	ed	ed-in	intronic	29	0.175758	15	G	A	G
3L	18075392	CG34252	8910	intergenic	64	0.390244	14	T	G	T	-0.62451	38.309	6.03849e-10	2L	4060120	ed	ed-in	intronic	29	0.175758	15	G	A	G
3L	18075392	CG34252	8910	intergenic	64	0.390244	14	T	G	T	-0.62451	38.309	6.03849e-10	2L	4060120	ed	ed-in	intronic	29	0.175758	15	G	A	G
2L	11901848	Or33a	-32657	intergenic	49	0.310127	13	T	A	A	0.74739	38.3066	6.04562e-10	2L	14401341	elB	elB-in	intronic	17	0.103659	8	T	G	T
2L	11901848	CG42751	47923	intergenic	49	0.310127	13	T	A	A	0.74739	38.3066	6.04562e-10	2L	14401341	elB	elB-in	intronic	17	0.103659	8	T	G	T
2L	11901848	Pde1c	Pde1c-in	intronic	49	0.310127	13	T	A	A	0.74739	38.3066	6.04562e-10	2L	14401341	elB	elB-in	intronic	17	0.103659	8	T	G	T
3L	2254707	CG1275	CG1275-in	intronic	37	0.222892	19	T	C	T	0.55709	38.2769	6.13838e-10	3L	10979973	klu	klu-in	intronic	60	0.458015	7	C	A	A
2L	1609740	CG31935	CG31935-in	intronic	67	0.41358	22	C	G	C	-0.68059	38.2757	6.14234e-10	2L	14401341	elB	elB-in	intronic	17	0.103659	8	T	G	T
2R	3481315	scra	scra-in	intronic	39	0.242236	25	T	A	A	0.55829	38.2702	6.15968e-10	3L	5800934	S6k	S6k-in	intronic	71	0.427711	21	A	G	G
2R	3481315	scra	scra-in	intronic	39	0.242236	25	T	A	A	0.55829	38.2702	6.15968e-10	3L	5800934	S6k	S6k-in	intronic	71	0.427711	21	A	G	G
3R	23634071	CG34353	CG34353-in	intronic	28	0.170732	17	G	C	G	0.72238	38.27	6.16015e-10	3R	26179528	hdc	hdc-in	intronic	29	0.176829	13	G	A	A
2L	6066948	CG9147	CG9147:4	synonymous	38	0.238994	17	C	T	C	-0.58519	38.2578	6.19894e-10	3L	13248163	caps	caps-in	intronic	59	0.359756	15	A	T	T
3R	23842223	CG34362	-10111	intergenic	72	0.447205	11	A	G	A	0.57164	38.2542	6.21038e-10	2L	4030916	ed	-463	intergenic	32	0.201258	9	C	T	C
3R	23842223	CG34362	-10111	intergenic	72	0.447205	11	A	G	A	0.57164	38.2542	6.21038e-10	2L	4030916	ed	-463	intergenic	32	0.201258	9	C	T	C
3R	23842223	CG4815	25750	intergenic	72	0.447205	11	A	G	A	0.57164	38.2542	6.21038e-10	2L	4030916	ed	-463	intergenic	32	0.201258	9	C	T	C
3R	23842223	CG4815	25750	intergenic	72	0.447205	11	A	G	A	0.57164	38.2542	6.21038e-10	2L	4030916	ed	-463	intergenic	32	0.201258	9	C	T	C
X	20823958	Ser6	-9672	intergenic	76	0.45509	11	C	T	C	-0.48084	38.2399	6.25608e-10	3R	6377362	hth	hth-in	intronic	70	0.44586	15	A	T	A
X	20823958	Npc1b	13550	intergenic	76	0.45509	11	C	T	C	-0.48084	38.2399	6.25608e-10	3R	6377362	hth	hth-in	intronic	70	0.44586	15	A	T	A
3L	2140255	zormin	zormin:18	synonymous	67	0.406061	21	G	C	G	0.69364	38.2349	6.27215e-10	2R	17259944	cv-2	cv-2-in	intronic	28	0.170732	7	A	C	C
3R	9176366	mthl12	-3029	intergenic	41	0.25625	14	G	A	G	0.62155	38.2209	6.31727e-10	2L	4058798	ed	ed-in	intronic	34	0.207317	11	T	C	T
3R	9176366	mthl12	-3029	intergenic	41	0.25625	14	G	A	G	0.62155	38.2209	6.31727e-10	2L	4058798	ed	ed-in	intronic	34	0.207317	11	T	C	T
3R	9176366	CG8784	5858	intergenic	41	0.25625	14	G	A	G	0.62155	38.2209	6.31727e-10	2L	4058798	ed	ed-in	intronic	34	0.207317	11	T	C	T
3R	9176366	CG8784	5858	intergenic	41	0.25625	14	G	A	G	0.62155	38.2209	6.31727e-10	2L	4058798	ed	ed-in	intronic	34	0.207317	11	T	C	T
3R	17688067	lsn	-2855	intergenic	15	0.0903614	14	C	A	C	-0.76962	38.2194	6.3221e-10	2L	5032430	Cg25C	Cg25C-in	intronic	56	0.356688	20	G	A	G
3R	17688067	glec	6083	intergenic	15	0.0903614	14	C	A	C	-0.76962	38.2194	6.3221e-10	2L	5032430	Cg25C	Cg25C-in	intronic	56	0.356688	20	G	A	G
3L	18788183	ftz-f1	ftz-f1-in	intronic	61	0.378882	17	G	A	A	-0.52657	38.2139	6.33985e-10	3R	7466623	Csk	Csk-in	intronic	44	0.280255	22	T	A	T
3L	18788183	ftz-f1	ftz-f1-in	intronic	61	0.378882	17	G	A	A	-0.52657	38.2139	6.33985e-10	3R	7466623	Csk	Csk-in	intronic	44	0.280255	22	T	A	T
2L	1921507	CG7337	CG7337-in	intronic	25	0.152439	14	C	T	C	-0.66581	38.2082	6.35836e-10	2R	7081672	shn	shn-in	intronic	50	0.304878	11	C	T	C
3L	19287053	fal	-816	intergenic	64	0.407643	8	T	C	T	-0.50184	38.2003	6.38422e-10	3L	9656672	fry	fry-in	intronic	58	0.349398	21	T	C	T
3L	19287053	CG9619	5384	intergenic	64	0.407643	8	T	C	T	-0.50184	38.2003	6.38422e-10	3L	9656672	fry	fry-in	intronic	58	0.349398	21	T	C	T
2R	6884809	luna	luna-in	intronic	23	0.139394	21	C	T	C	-0.77234	38.1884	6.42336e-10	X	18460257	Bx	Bx-in	intronic	48	0.296296	10	T	A	A
3L	18326292	rpr	-64361	intergenic	38	0.258503	4	C	T	T	-0.56565	38.1834	6.43966e-10	3L	2737262	Mrtf	Mrtf-in	intronic	57	0.363057	7	C	G	C
3L	18326292	grim	28778	intergenic	38	0.258503	4	C	T	T	-0.56565	38.1834	6.43966e-10	3L	2737262	Mrtf	Mrtf-in	intronic	57	0.363057	7	C	G	C
2R	10856467	CG12424	CG12424-in	intronic	55	0.341615	15	C	T	T	-0.51763	38.1801	6.45078e-10	2R	16713076	insc	insc-in	intronic	56	0.343558	19	G	A	A
2R	10856468	CG12424	CG12424-in	intronic	55	0.34375	16	T	C	C	-0.51763	38.1801	6.45078e-10	2R	16713076	insc	insc-in	intronic	56	0.343558	19	G	A	A
3L	18545968	star1	-7390	intergenic	46	0.283951	15	G	C	G	0.54623	38.1634	6.50626e-10	3L	8554391	rhea	rhea-u5	UTR	69	0.420732	9	C	A	A
3L	18545968	CG32198	25468	intergenic	46	0.283951	15	G	C	G	0.54623	38.1634	6.50626e-10	3L	8554391	rhea	rhea-u5	UTR	69	0.420732	9	C	A	A
2R	8891503	Su(z)2		synonymous	15	0.109489	9	A	G	A	0.61085	38.157	6.52757e-10	3L	3854437	Awh	Awh-in	intronic	80	0.479042	12	G	T	T
2R	11838813	Strn-Mlck	Strn-Mlck-cds	synonymous	47	0.290123	12	G	T	G	0.63559	38.1549	6.53466e-10	3R	21871353	gro	gro:12	synonymous	29	0.18239	10	C	T	C
3R	26875867	Aph-4	Aph-4-in	intronic	54	0.339623	9	A	C	A	-0.50507	38.1541	6.53715e-10	3R	21715808	Lnk	Lnk-cds	synonymous	80	0.490798	17	T	C	C
2L	19858671	sick	sick-in	intronic	26	0.1625	12	A	C	A	0.71803	38.1467	6.56215e-10	3L	9647846	fry	fry-in	intronic	47	0.297468	19	T	A	T
X	5046555	CG15465	-12809	intergenic	46	0.282209	8	C	A	C	0.56007	38.1423	6.57702e-10	X	1546771	br	br-in	intronic	74	0.448485	12	T	C	C
X	5046555	CG6789	19533	intergenic	46	0.282209	8	C	A	C	0.56007	38.1423	6.57702e-10	X	1546771	br	br-in	intronic	74	0.448485	12	T	C	C
X	5046555	rg	rg-in	intronic	46	0.282209	8	C	A	C	0.56007	38.1423	6.57702e-10	X	1546771	br	br-in	intronic	74	0.448485	12	T	C	C
3L	3537610	Eip63E	Eip63E-in	intronic	29	0.174699	13	A	T	A	0.65966	38.1336	6.60625e-10	3L	19701030	serp	serp-u5	UTR	45	0.279503	13	G	T	G
2R	19307524	CG9815	-1507	intergenic	72	0.439024	19	T	G	T	0.49644	38.1326	6.60971e-10	3R	17427648	InR	InR-in	intronic	58	0.3625	14	G	A	G
2R	19307524	CG9815	-1507	intergenic	72	0.439024	19	T	G	T	0.49644	38.1326	6.60971e-10	3R	17427648	InR	InR-in	intronic	58	0.3625	14	G	A	G
2R	19307524	CG30411	2763	intergenic	72	0.439024	19	T	G	T	0.49644	38.1326	6.60971e-10	3R	17427648	InR	InR-in	intronic	58	0.3625	14	G	A	G
2R	19307524	CG30411	2763	intergenic	72	0.439024	19	T	G	T	0.49644	38.1326	6.60971e-10	3R	17427648	InR	InR-in	intronic	58	0.3625	14	G	A	G
2L	9119129	CG32982	-6622	intergenic	42	0.265823	17	G	A	A	0.566	38.1243	6.63768e-10	3R	8515717	Su(fu)		UTR	68	0.43038	18	T	A	T
2L	9119129	Or30a	5844	intergenic	42	0.265823	17	G	A	A	0.566	38.1243	6.63768e-10	3R	8515717	Su(fu)		UTR	68	0.43038	18	T	A	T
3L	4695470	CG13713	-2209	intergenic	26	0.164557	8	G	A	A	0.78445	38.1221	6.6452e-10	3R	21871353	gro	gro:12	synonymous	29	0.18239	10	C	T	C
3L	4695470	CG15876	647	intergenic	26	0.164557	8	G	A	A	0.78445	38.1221	6.6452e-10	3R	21871353	gro	gro:12	synonymous	29	0.18239	10	C	T	C
3L	4695470	Gef64C	Gef64C-in	intronic	26	0.164557	8	G	A	A	0.78445	38.1221	6.6452e-10	3R	21871353	gro	gro:12	synonymous	29	0.18239	10	C	T	C
2L	14382440	elB	-8185	intergenic	45	0.283019	13	A	T	T	-0.51897	38.1189	6.65611e-10	X	2410162	trol	trol-in	intronic	9	0.0576923	11	A	T	A
2L	14382440	ppk	1270	intergenic	45	0.283019	13	A	T	T	-0.51897	38.1189	6.65611e-10	X	2410162	trol	trol-in	intronic	9	0.0576923	11	A	T	A
2L	14432065	CG15283	-18217	intergenic	37	0.23125	10	G	A	G	-0.7426	38.1151	6.66917e-10	2L	4094731	ed	ed-in	intronic	20	0.125	13	T	A	T
2L	14432065	CG15283	-18217	intergenic	37	0.23125	10	G	A	G	-0.7426	38.1151	6.66917e-10	2L	4094731	ed	ed-in	intronic	20	0.125	13	T	A	T
2L	14432065	Cpr35B	6934	intergenic	37	0.23125	10	G	A	G	-0.7426	38.1151	6.66917e-10	2L	4094731	ed	ed-in	intronic	20	0.125	13	T	A	T
2L	14432065	Cpr35B	6934	intergenic	37	0.23125	10	G	A	G	-0.7426	38.1151	6.66917e-10	2L	4094731	ed	ed-in	intronic	20	0.125	13	T	A	T
2L	4377153	Traf4	Traf4-in	intronic	33	0.203704	14	G	T	T	-0.69124	38.1135	6.67474e-10	2L	1694094	chinmo	chinmo-in	intronic	54	0.341772	13	G	A	A
2L	1694094	chinmo	chinmo-in	intronic	54	0.341772	13	G	A	A	-0.69124	38.1135	6.67474e-10	2L	4377153	Traf4	Traf4-in	intronic	33	0.203704	14	G	T	T
2R	17731086	tRNA:CR30406	-4826	intergenic	29	0.174699	16	A	T	A	0.82572	38.1123	6.67864e-10	3L	11000944	klu	klu-in	intronic	26	0.154762	21	A	G	A
2R	17731086	tRNA:CR30407	413	intergenic	29	0.174699	16	A	T	A	0.82572	38.1123	6.67864e-10	3L	11000944	klu	klu-in	intronic	26	0.154762	21	A	G	A
3R	17415657	InR	InR-in	intronic	78	0.490566	16	G	A	G	-0.48115	38.1097	6.68787e-10	3R	26117489	hdc	hdc-in	intronic	74	0.465409	12	G	C	C
3R	26117489	hdc	hdc-in	intronic	74	0.465409	12	G	C	C	-0.48115	38.1097	6.68787e-10	3R	17415657	InR	InR-in	intronic	78	0.490566	16	G	A	G
3R	26117489	hdc	hdc-in	intronic	74	0.465409	12	G	C	C	-0.48115	38.1097	6.68787e-10	3R	17415657	InR	InR-in	intronic	78	0.490566	16	G	A	G
3L	5430393	CG34391	CG34391-in	intronic	54	0.325301	13	G	T	T	-0.64455	38.1008	6.7184e-10	X	18457812	Bx	Bx-in	intronic	29	0.176829	12	A	G	A
3L	5430393	CG34391	CG34391-in	intronic	54	0.325301	13	G	T	T	-0.64455	38.1008	6.7184e-10	X	18457816	Bx	Bx-in	intronic	30	0.181818	11	C	T	C
2L	8377045	CG17294	-6	intergenic	20	0.120482	20	T	C	T	0.80216	38.0953	6.73737e-10	2L	642258	ds	ds-PA	missense	44	0.275	10	C	T	T
2L	8377045	CG17294	-6	intergenic	20	0.120482	20	T	C	T	0.80216	38.0953	6.73737e-10	2L	642258	ds	ds-PA	missense	44	0.275	10	C	T	T
2L	8377045	CG13390	268	intergenic	20	0.120482	20	T	C	T	0.80216	38.0953	6.73737e-10	2L	642258	ds	ds-PA	missense	44	0.275	10	C	T	T
2L	8377045	CG13390	268	intergenic	20	0.120482	20	T	C	T	0.80216	38.0953	6.73737e-10	2L	642258	ds	ds-PA	missense	44	0.275	10	C	T	T
3R	18642309	CG4704	-27605	intergenic	63	0.401274	12	T	A	A	0.56255	38.0924	6.74732e-10	3L	8846490	dally	dally-in	intronic	42	0.251497	15	T	C	T
3R	18642309	CG13840	358	intergenic	63	0.401274	12	T	A	A	0.56255	38.0924	6.74732e-10	3L	8846490	dally	dally-in	intronic	42	0.251497	15	T	C	T
3R	25023161	CG14515	-144	intergenic	51	0.322785	8	T	C	T	-0.50509	38.0876	6.76393e-10	3R	23009084	Ser	Ser-in	intronic	69	0.433962	14	G	T	G
3R	25023161	CG14509	2445	intergenic	51	0.322785	8	T	C	T	-0.50509	38.0876	6.76393e-10	3R	23009084	Ser	Ser-in	intronic	69	0.433962	14	G	T	G
3R	22552060	CG14244	CG14244:2	synonymous	16	0.0958084	15	G	A	G	0.76231	38.0868	6.76669e-10	2R	17242604	cv-2	cv-2-u3	UTR	68	0.427673	12	G	A	G
2R	7106740	Syx6	-306	intergenic	53	0.333333	13	C	T	C	-0.67976	38.0752	6.80693e-10	3R	26630908	wts	wts-in	intronic	30	0.182927	13	C	G	C
2R	7106740	Syx6	-306	intergenic	53	0.333333	13	C	T	C	-0.67976	38.0752	6.80693e-10	3R	26630908	wts	wts-in	intronic	30	0.182927	13	C	G	C
2R	7106740	CG9084	22	intergenic	53	0.333333	13	C	T	C	-0.67976	38.0752	6.80693e-10	3R	26630908	wts	wts-in	intronic	30	0.182927	13	C	G	C
2R	7106740	CG9084	22	intergenic	53	0.333333	13	C	T	C	-0.67976	38.0752	6.80693e-10	3R	26630908	wts	wts-in	intronic	30	0.182927	13	C	G	C
2R	13382773	CG30103	CG30103-cds	synonymous	66	0.409938	15	C	G	G	-0.50726	38.0644	6.84476e-10	2L	2740775	Hrs	Hrs:5	synonymous	59	0.373418	18	G	A	G
3L	12709702	SmD1	-16757	intergenic	54	0.331288	9	C	T	T	-0.52993	38.061	6.85668e-10	2L	2163678	aop	aop-in	intronic	75	0.480769	16	A	G	G
3L	12709702	mirr	6459	intergenic	54	0.331288	9	C	T	T	-0.52993	38.061	6.85668e-10	2L	2163678	aop	aop-in	intronic	75	0.480769	16	A	G	G
X	17903899	CG6867	-14005	intergenic	28	0.166667	12	T	G	T	0.65728	38.0575	6.86911e-10	2L	2886364	lilli	lilli-in	UTR	42	0.256098	19	G	A	G
X	17903899	CG12672	2374	intergenic	28	0.166667	12	T	G	T	0.65728	38.0575	6.86911e-10	2L	2886364	lilli	lilli-in	UTR	42	0.256098	19	G	A	G
X	17903899	Sh	Sh-in	intronic	28	0.166667	12	T	G	T	0.65728	38.0575	6.86911e-10	2L	2886364	lilli	lilli-in	UTR	42	0.256098	19	G	A	G
3L	4721462	CG12493	-30931	intergenic	23	0.142857	5	T	C	T	-0.72371	38.0541	6.8811e-10	3L	4155048	nab	nab-in	intronic	68	0.407186	19	A	T	T
3L	4721462	CG13712	11606	intergenic	23	0.142857	5	T	C	T	-0.72371	38.0541	6.8811e-10	3L	4155048	nab	nab-in	intronic	68	0.407186	19	A	T	T
3L	4721462	Gef64C	Gef64C-in	intronic	23	0.142857	5	T	C	T	-0.72371	38.0541	6.8811e-10	3L	4155048	nab	nab-in	intronic	68	0.407186	19	A	T	T
2R	15226171	CG9975	-3143	intergenic	58	0.371795	7	G	A	G	0.60658	38.0502	6.89465e-10	2L	5267116	tkv	tkv-in	synonymous	25	0.153374	11	A	G	G
2R	15226171	CG34045	3478	intergenic	58	0.371795	7	G	A	G	0.60658	38.0502	6.89465e-10	2L	5267116	tkv	tkv-in	synonymous	25	0.153374	11	A	G	G
2L	4152241	Or24a	-12448	intergenic	30	0.191083	13	A	G	A	0.63011	38.0481	6.90212e-10	3R	12894172	Dad	Dad-in	intronic	73	0.462025	18	T	C	T
2L	4152241	CG2955	1038	intergenic	30	0.191083	13	A	G	A	0.63011	38.0481	6.90212e-10	3R	12894172	Dad	Dad-in	intronic	73	0.462025	18	T	C	T
3L	9219280	CG4483	-8970	intergenic	40	0.242424	11	C	T	C	0.58036	38.0456	6.91102e-10	2L	4051119	ed	ed-in	intronic	48	0.301887	16	T	C	T
3L	9219280	CG4483	-8970	intergenic	40	0.242424	11	C	T	C	0.58036	38.0456	6.91102e-10	2L	4051119	ed	ed-in	intronic	48	0.301887	16	T	C	T
3L	9219280	CG4476	10911	intergenic	40	0.242424	11	C	T	C	0.58036	38.0456	6.91102e-10	2L	4051119	ed	ed-in	intronic	48	0.301887	16	T	C	T
3L	9219280	CG4476	10911	intergenic	40	0.242424	11	C	T	C	0.58036	38.0456	6.91102e-10	2L	4051119	ed	ed-in	intronic	48	0.301887	16	T	C	T
2L	9315372	CG17005	-12372	intergenic	45	0.286624	15	C	A	C	-0.71613	38.0306	6.96426e-10	2L	14401341	elB	elB-in	intronic	17	0.103659	8	T	G	T
2L	9315372	CG42844	10365	intergenic	45	0.286624	15	C	A	C	-0.71613	38.0306	6.96426e-10	2L	14401341	elB	elB-in	intronic	17	0.103659	8	T	G	T
3R	11077337	CG42404	CG42404-in	intergenic	55	0.361842	8	A	G	A	-0.6714	38.0245	6.98629e-10	2L	14401260	elB	elB-in	intronic	23	0.144654	11	G	A	G
2R	19690410	CG30177	CG30177-u3	intergenic	70	0.429448	18	T	C	T	0.52955	38.0187	7.00717e-10	2L	532537	ush	ush-in	intronic	52	0.335484	25	A	T	T
2R	6545110	stan	-15951	intergenic	35	0.214724	10	A	C	C	0.56701	38.0138	7.0246e-10	3R	25293974	Ptp99A	Ptp99A-in	intronic	71	0.440994	19	A	G	G
2R	6545110	CG12934	7860	intergenic	35	0.214724	10	A	C	C	0.56701	38.0138	7.0246e-10	3R	25293974	Ptp99A	Ptp99A-in	intronic	71	0.440994	19	A	G	G
3R	26875867	Aph-4	Aph-4-in	intronic	54	0.339623	9	A	C	A	-0.49978	38.012	7.03112e-10	3R	21715799	Lnk	Lnk-cds	synonymous	80	0.493827	16	A	G	G
3L	766508	tRNA:CR32480	-2995	intergenic	9	0.0661765	11	C	A	C	-0.49257	38.008	7.04535e-10	3L	350702	Ptpmeg	Ptpmeg-in	intronic	49	0.29697	17	C	T	C
3L	766508	emc	13003	intergenic	9	0.0661765	11	C	A	C	-0.49257	38.008	7.04535e-10	3L	350702	Ptpmeg	Ptpmeg-in	intronic	49	0.29697	17	C	T	C
2R	7317312	CG7777	-6439	intergenic	76	0.481013	14	C	A	A	-0.60116	38.0074	7.04751e-10	2R	16708194	insc	-577	intergenic	34	0.21118	22	A	G	A
2R	7317312	CG7763	14470	intergenic	76	0.481013	14	C	A	A	-0.60116	38.0074	7.04751e-10	2R	16708194	insc	-577	intergenic	34	0.21118	22	A	G	A
2L	2462854	CG15393	-26900	intergenic	19	0.11875	11	G	C	G	0.67176	38.004	7.05986e-10	3R	15151635	Dl	Dl-u5	UTR	59	0.36875	15	T	C	T
2L	2462854	tRNA:Y1:22Fa	168	intergenic	19	0.11875	11	G	C	G	0.67176	38.004	7.05986e-10	3R	15151635	Dl	Dl-u5	UTR	59	0.36875	15	T	C	T
3R	9114172	CG15887	CG15887-in	intronic	46	0.285714	14	A	C	A	0.63726	37.9984	7.08015e-10	3R	20478904	ash2	ash2-cds	synonymous	32	0.198758	20	T	C	T
3L	9583285	CG42673	CG42673-in	intronic	22	0.134146	7	A	G	A	0.82626	37.9922	7.10282e-10	3L	8841787	dally	dally-in	intronic	35	0.210843	17	C	T	T
2L	268283	CG3345	-805	intergenic	59	0.36646	16	A	T	T	-0.5095	37.9624	7.21204e-10	3L	8860199	dally	dally-in	intronic	5	0.0462963	5	G	T	G
2L	268283	CG17075	1595	intergenic	59	0.36646	16	A	T	T	-0.5095	37.9624	7.21204e-10	3L	8860199	dally	dally-in	intronic	5	0.0462963	5	G	T	G
2L	268283	CG3645	CG3645-in	intronic	59	0.36646	16	A	T	T	-0.5095	37.9624	7.21204e-10	3L	8860199	dally	dally-in	intronic	5	0.0462963	5	G	T	G
2R	18615473	jbug	jbug-in	intronic	48	0.305732	8	T	G	G	-0.55755	37.9543	7.24211e-10	X	3044522	N	N-in	intronic	63	0.381818	12	C	G	C
2R	10629245	CG12858	CG12858:4	synonymous	28	0.175	17	T	C	T	-0.60643	37.9518	7.25141e-10	3L	17354372	tap	tap-u3	UTR	66	0.409938	10	T	C	T
X	12133919	CG2577	-133325	intergenic	58	0.347305	13	T	A	T	-0.56268	37.9479	7.26579e-10	3L	13222558	caps	caps-in	intronic	43	0.273885	6	T	A	A
X	12133919	CG32655	4157	intergenic	58	0.347305	13	T	A	T	-0.56268	37.9479	7.26579e-10	3L	13222558	caps	caps-in	intronic	43	0.273885	6	T	A	A
X	12133919	Ten-a	Ten-a-in	intronic	58	0.347305	13	T	A	T	-0.56268	37.9479	7.26579e-10	3L	13222558	caps	caps-in	intronic	43	0.273885	6	T	A	A
3L	4172925	Ero1L	Ero1L-in	intronic	42	0.251497	18	A	C	A	-0.53514	37.9403	7.29433e-10	2L	645209	ds	ds:11	synonymous	71	0.44375	18	C	G	C
3L	4172925	Ero1L	Ero1L-in	intronic	42	0.251497	18	A	C	A	-0.53514	37.9403	7.29433e-10	2L	645209	ds	ds:11	synonymous	71	0.44375	18	C	G	C
3L	976484	Glut1	Glut1-in	intronic	46	0.285714	12	C	T	T	0.62277	37.9321	7.32494e-10	3L	16627770	Abl	Abl-in	intronic	43	0.259036	12	A	G	G
3L	11432590	CG7557	-5671	intergenic	36	0.215569	15	C	G	G	0.65278	37.9311	7.32879e-10	3L	8008089	nmo	nmo-in	intronic	56	0.339394	6	G	T	T
3L	11432590	CG6149	4029	intergenic	36	0.215569	15	C	G	G	0.65278	37.9311	7.32879e-10	3L	8008089	nmo	nmo-in	intronic	56	0.339394	6	G	T	T
3R	10749579	CG14861	-90913	intergenic	32	0.201258	20	G	C	G	0.68189	37.917	7.38208e-10	3R	2781031	Antp	Antp-in	intronic	29	0.179012	12	C	T	C
3R	10749579	CG3837	1552	intergenic	32	0.201258	20	G	C	G	0.68189	37.917	7.38208e-10	3R	2781031	Antp	Antp-in	intronic	29	0.179012	12	C	T	C
3L	3101665	CG14955	-8463	intergenic	57	0.413043	5	C	A	C	0.48708	37.9145	7.39157e-10	3L	9637792	fry	fry-in	UTR	75	0.462963	14	T	G	T
3L	3101665	tRNA:CR32286	4075	intergenic	57	0.413043	5	C	A	C	0.48708	37.9145	7.39157e-10	3L	9637792	fry	fry-in	UTR	75	0.462963	14	T	G	T
3L	3101665	Cht7	Cht7-in	intronic	57	0.413043	5	C	A	C	0.48708	37.9145	7.39157e-10	3L	9637792	fry	fry-in	UTR	75	0.462963	14	T	G	T
X	2236610	phl	phl:5	synonymous	54	0.321429	12	G	A	G	0.52411	37.9106	7.4063e-10	3L	3351417	kst	kst-in	intronic	77	0.469512	15	A	G	G
3L	3351417	kst	kst-in	intronic	77	0.469512	15	A	G	G	0.52411	37.9106	7.4063e-10	X	2236610	phl	phl:5	synonymous	54	0.321429	12	G	A	G
3R	22851294	CG6271	CG6271-PA	synonymous	34	0.216561	13	G	A	A	-0.68671	37.8972	7.45704e-10	2R	7079912	shn	shn-in	intronic	28	0.169697	10	C	A	C
2L	20296593	spir	-14626	intergenic	38	0.238994	8	A	G	G	-0.61112	37.8946	7.46696e-10	3R	9891268	foxo	foxo-in	intronic	41	0.259494	8	A	G	G
2L	20296593	CG12617	1273	intergenic	38	0.238994	8	A	G	G	-0.61112	37.8946	7.46696e-10	3R	9891268	foxo	foxo-in	intronic	41	0.259494	8	A	G	G
3L	961744	Glut1	Glut1-in	intronic	31	0.187879	13	A	T	A	-0.65981	37.8914	7.47929e-10	2L	2920248	lilli	lilli-in	intronic	33	0.208861	15	G	C	G
3L	17901101	CG14353	-142	intergenic	34	0.207317	9	A	G	A	0.63413	37.8873	7.49506e-10	3L	9637930	fry	fry-in	UTR	47	0.281437	20	T	G	T
3L	17901101	Prestin	6248	intergenic	34	0.207317	9	A	G	A	0.63413	37.8873	7.49506e-10	3L	9637930	fry	fry-in	UTR	47	0.281437	20	T	G	T
2L	19890821	sick	sick-in	intronic	19	0.120253	16	A	T	T	-0.77462	37.8843	7.50679e-10	3R	9909111	foxo	foxo-in	intronic	36	0.225	16	G	A	G
2L	19890821	CG10481	CG10481-in	intronic	19	0.120253	16	A	T	T	-0.77462	37.8843	7.50679e-10	3R	9909111	foxo	foxo-in	intronic	36	0.225	16	G	A	G
2R	12702642	CG5550	-1454	intergenic	61	0.376543	16	C	T	C	0.52429	37.8813	7.51843e-10	3L	7525295	lqf	lqf-in	intronic	54	0.339623	11	T	G	G
2R	12702642	CG5550	-1454	intergenic	61	0.376543	16	C	T	C	0.52429	37.8813	7.51843e-10	3L	7525296	lqf	lqf-in	intronic	54	0.346154	9	G	A	A
2R	12702642	CG15615	18730	intergenic	61	0.376543	16	C	T	C	0.52429	37.8813	7.51843e-10	3L	7525295	lqf	lqf-in	intronic	54	0.339623	11	T	G	G
2R	12702642	CG15615	18730	intergenic	61	0.376543	16	C	T	C	0.52429	37.8813	7.51843e-10	3L	7525296	lqf	lqf-in	intronic	54	0.346154	9	G	A	A
3R	10996164	Mf	-183	intergenic	50	0.316456	18	G	T	G	0.57085	37.8734	7.5486e-10	3R	26141792	hdc	hdc-in	intronic	42	0.256098	13	C	T	C
3R	10996164	CG6904	22835	intergenic	50	0.316456	18	G	T	G	0.57085	37.8734	7.5486e-10	3R	26141792	hdc	hdc-in	intronic	42	0.256098	13	C	T	C
3L	10907952	CG34050	-29604	intergenic	53	0.317365	15	A	G	A	0.76027	37.8723	7.55319e-10	2L	14401341	elB	elB-in	intronic	17	0.103659	8	T	G	T
3L	10907952	Aps	15728	intergenic	53	0.317365	15	A	G	A	0.76027	37.8723	7.55319e-10	2L	14401341	elB	elB-in	intronic	17	0.103659	8	T	G	T
3R	19885109	SMC1	SMC1:4	synonymous	55	0.34375	16	A	T	T	-0.51811	37.8671	7.57318e-10	2R	10423254	ttv	ttv-in	intronic	60	0.384615	10	T	C	T
3R	26707178	CG15547	-336	intergenic	59	0.375796	13	A	G	A	0.4934	37.8636	7.58692e-10	2R	9743446	tum	-209	intergenic	63	0.384146	17	A	C	A
3R	26707178	CG12071	581	intergenic	59	0.375796	13	A	G	A	0.4934	37.8636	7.58692e-10	2R	9743446	tum	-209	intergenic	63	0.384146	17	A	C	A
3R	19085605	CG13827	CG13827:2	synonymous	45	0.279503	18	G	T	G	0.54875	37.8545	7.62234e-10	3R	17404796	InR	InR:9	synonymous	74	0.468354	19	T	C	T
3R	19085605	CG13827	CG13827:2	synonymous	45	0.279503	18	G	T	G	0.54875	37.8545	7.62234e-10	3R	17404796	InR	InR:9	synonymous	74	0.468354	19	T	C	T
X	10609226	CG32676	CG32676-in	intronic	24	0.142857	16	T	A	T	-0.77808	37.8493	7.6425e-10	X	18457815	Bx	Bx-in	intronic	30	0.182927	10	C	T	C
3L	13591134	bru-3	bru-3-in		1	0.015873	0	A	G	A	0.5365	37.8365	7.69287e-10	3R	11859159	pnr	pnr-in	intronic	49	0.312102	10	A	G	A
2R	15226176	CG9975	-3138	intergenic	52	0.329114	7	A	T	A	0.59732	37.8182	7.76538e-10	2L	5267116	tkv	tkv-in	synonymous	25	0.153374	11	A	G	G
2R	15226176	CG34045	3483	intergenic	52	0.329114	7	A	T	A	0.59732	37.8182	7.76538e-10	2L	5267116	tkv	tkv-in	synonymous	25	0.153374	11	A	G	G
2L	5954038	CG9044	CG9044:8	synonymous	58	0.369427	22	T	C	C	-0.48866	37.8034	7.82467e-10	3L	14358076	fz	fz-in	intronic	80	0.490798	11	A	G	G
2R	20748589	Atf-2	-9001	intergenic	24	0.148148	18	A	T	A	-0.77932	37.7979	7.84652e-10	3L	5817008	vn	vn-in	intronic	25	0.149701	20	T	G	G
2R	20748589	CG3650	11305	intergenic	24	0.148148	18	A	T	A	-0.77932	37.7979	7.84652e-10	3L	5817008	vn	vn-in	intronic	25	0.149701	20	T	G	G
2L	8713475	raw	raw-in	intronic	39	0.240741	13	T	C	T	-0.77532	37.787	7.89044e-10	3R	26165277	hdc	hdc-in	intronic	28	0.17284	13	A	G	A
2R	3809339	Or43b	Or43b-cds	synonymous	69	0.425926	17	G	C	C	-0.49197	37.7865	7.89258e-10	3R	25076854	stg	-686	intergenic	61	0.383648	15	C	T	T
2L	13912224	Acyp	Acyp-PA	synonymous	35	0.213415	14	C	T	C	-0.74011	37.7776	7.92853e-10	X	18457869	Bx	Bx-in	intronic	29	0.173653	14	G	A	G
3L	16093921	CG5414	CG5414-in	intronic	66	0.417722	22	G	A	A	0.61966	37.7572	8.01221e-10	2L	5268217	tkv	tkv-in	synonymous	26	0.159509	15	A	G	A
3R	13952418	CG14316	-25424	intergenic	61	0.378882	19	G	A	G	0.50359	37.752	8.03329e-10	3L	16004801	mib1	mib1-u5	UTR	59	0.364198	21	T	C	C
3R	13952418	tRNA:CR31518	17632	intergenic	61	0.378882	19	G	A	G	0.50359	37.752	8.03329e-10	3L	16004801	mib1	mib1-u5	UTR	59	0.364198	21	T	C	C
3R	13952418	sr	sr-in	intronic	61	0.378882	19	G	A	G	0.50359	37.752	8.03329e-10	3L	16004801	mib1	mib1-u5	UTR	59	0.364198	21	T	C	C
2L	2395634	VGlut	-4672	intergenic	24	0.143713	17	C	T	C	-0.66407	37.7472	8.05313e-10	X	1995870	csw	csw-in	intronic	78	0.46988	13	G	A	A
2L	2395634	CG3557	9842	intergenic	24	0.143713	17	C	T	C	-0.66407	37.7472	8.05313e-10	X	1995870	csw	csw-in	intronic	78	0.46988	13	G	A	A
2L	964004	ia2	-47417	intergenic	57	0.358491	11	T	G	G	0.49319	37.7456	8.05984e-10	2R	10447869	ttv	ttv-in	intronic	61	0.391026	7	A	G	A
2L	964004	CG4341	5906	intergenic	57	0.358491	11	T	G	G	0.49319	37.7456	8.05984e-10	2R	10447869	ttv	ttv-in	intronic	61	0.391026	7	A	G	A
3L	21453919	croc	-13216	intergenic	65	0.419355	14	A	C	A	-0.52674	37.7419	8.07502e-10	3L	8852809	dally	dally-in	intronic	53	0.315476	18	C	T	C
3L	21453919	Syx7	12684	intergenic	65	0.419355	14	A	C	A	-0.52674	37.7419	8.07502e-10	3L	8852809	dally	dally-in	intronic	53	0.315476	18	C	T	C
3L	10694938	CG12523	-99354	intergenic	40	0.25974	7	T	G	T	-0.61534	37.7353	8.10244e-10	2R	18136674	dve	dve-in	intronic	39	0.24375	18	A	G	A
3L	10694938	NijA	4964	intergenic	40	0.25974	7	T	G	T	-0.61534	37.7353	8.10244e-10	2R	18136674	dve	dve-in	intronic	39	0.24375	18	A	G	A
3L	17951750	Eip75B	Eip75B-in	intronic	74	0.459627	15	T	C	C	-0.47738	37.7343	8.10674e-10	2R	14169105	sbb	sbb-in	intronic	79	0.475904	14	A	C	C
X	7774061	Ir7e	Ir7e-PA	synonymous	79	0.473054	22	A	G	G	0.63203	37.7342	8.10699e-10	3R	26137838	hdc	hdc-in	intronic	29	0.176829	15	A	G	A
3R	25154758	Ptp99A	-48229	intergenic	63	0.388889	14	C	G	C	0.55557	37.7247	8.14653e-10	X	1548906	br	br-u3	UTR	43	0.257485	16	C	T	C
3R	25154758	Cnx99A	9392	intergenic	63	0.388889	14	C	G	C	0.55557	37.7247	8.14653e-10	X	1548906	br	br-u3	UTR	43	0.257485	16	C	T	C
3L	18475732	AlCR2	-3870	intergenic	48	0.296296	11	T	G	T	-0.53686	37.7205	8.16409e-10	3R	26169618	hdc	hdc-in	intronic	57	0.375	15	C	T	T
3L	18475732	Met75Ca	10248	intergenic	48	0.296296	11	T	G	T	-0.53686	37.7205	8.16409e-10	3R	26169618	hdc	hdc-in	intronic	57	0.375	15	C	T	T
3R	23632009	CG34353	CG34353-in	intronic	39	0.239264	15	G	T	G	0.67048	37.7194	8.16871e-10	3R	26179528	hdc	hdc-in	intronic	29	0.176829	13	G	A	A
2L	7251077	CG13786	CG13786-PA	missense	29	0.175758	14	C	T	C	0.64575	37.7079	8.21701e-10	3R	15142016	Dl	Dl-in	intronic	49	0.302469	8	A	G	A
2L	3285265	CG9664	-5980	intergenic	72	0.464516	13	G	A	G	0.63358	37.7065	8.22283e-10	3L	8873699	dally	dally-in	intronic	29	0.179012	13	G	A	A
2L	3285265	CG3332	4732	intergenic	72	0.464516	13	G	A	G	0.63358	37.7065	8.22283e-10	3L	8873699	dally	dally-in	intronic	29	0.179012	13	G	A	A
3L	575955	hipk	hipk-u3	UTR	74	0.453988	8	G	A	A	0.5043	37.7002	8.24971e-10	3R	6429780	hth	hth-in	intronic	62	0.397436	13	C	T	T
3R	15903511	Rh3	-3261	intergenic	18	0.109091	19	T	C	T	-0.70723	37.7	8.25065e-10	2R	9775011	shot	shot:21	missense	56	0.35	19	G	A	G
3R	15903511	CG4973	18498	intergenic	18	0.109091	19	T	C	T	-0.70723	37.7	8.25065e-10	2R	9775011	shot	shot:21	missense	56	0.35	19	G	A	G
3L	9762626	CG8177	CG8177-in	intronic	62	0.385093	10	T	G	G	-0.53249	37.6995	8.2525e-10	3L	8843203	dally	dally-in	intronic	41	0.248485	19	A	G	G
2R	6545135	stan	-15926	intergenic	33	0.20625	9	G	A	A	0.56806	37.699	8.25454e-10	3R	25293974	Ptp99A	Ptp99A-in	intronic	71	0.440994	19	A	G	G
2R	6545135	CG12934	7885	intergenic	33	0.20625	9	G	A	A	0.56806	37.699	8.25454e-10	3R	25293974	Ptp99A	Ptp99A-in	intronic	71	0.440994	19	A	G	G
3L	10927215	CG34050	-10341	intergenic	58	0.347305	18	C	A	C	0.49368	37.6987	8.25607e-10	X	1544817	br	br-in	intronic	62	0.373494	15	C	T	C
3L	10927215	Aps	34991	intergenic	58	0.347305	18	C	A	C	0.49368	37.6987	8.25607e-10	X	1544817	br	br-in	intronic	62	0.373494	15	C	T	C
3R	6950338	Ugt86Dd	-1978	intergenic	46	0.283951	9	G	A	A	0.70839	37.6912	8.28779e-10	3R	21871353	gro	gro:12	synonymous	29	0.18239	10	C	T	C
3R	6950338	CG6629	8910	intergenic	46	0.283951	9	G	A	A	0.70839	37.6912	8.28779e-10	3R	21871353	gro	gro:12	synonymous	29	0.18239	10	C	T	C
3R	25491226	ppk21	ppk21:2	synonymous	26	0.157576	16	T	C	C	-0.64456	37.6899	8.29321e-10	2R	14124537	fj	721	intergenic	53	0.325153	14	C	T	T
X	10500200	CG9817	CG9817-in	intronic	60	0.357143	9	T	C	T	0.51949	37.6662	8.39458e-10	3L	3352478	kst	kst-in	intronic	57	0.343373	18	C	A	C
3R	4361465	Or85d	-16865	intergenic	17	0.10625	19	C	A	C	0.78812	37.6602	8.42053e-10	X	2366662	trol	trol-in	intronic	24	0.142857	15	G	A	G
3R	4361465	CG11741	6866	intergenic	17	0.10625	19	C	A	C	0.78812	37.6602	8.42053e-10	X	2366662	trol	trol-in	intronic	24	0.142857	15	G	A	G
2L	13915935	Ance-3	Ance-3-in	intronic	29	0.179012	18	T	C	T	-0.71282	37.6559	8.43903e-10	X	18457904	Bx	Bx-in	intronic	30	0.179641	16	G	A	G
X	21449814	CG14476	-21813	intergenic	63	0.377246	12	G	A	G	0.71611	37.6541	8.4468e-10	2L	14401341	elB	elB-in	intronic	17	0.103659	8	T	G	T
X	21449814	CG32822	56757	intergenic	63	0.377246	12	G	A	G	0.71611	37.6541	8.4468e-10	2L	14401341	elB	elB-in	intronic	17	0.103659	8	T	G	T
3R	22814484	CG31076	-273	intergenic	49	0.30625	8	A	T	T	0.57486	37.6534	8.44976e-10	X	4315136	bi	bi-in	intronic	26	0.185714	5	T	A	T
3R	22814484	CG31075	247	intergenic	49	0.30625	8	A	T	T	0.57486	37.6534	8.44976e-10	X	4315136	bi	bi-in	intronic	26	0.185714	5	T	A	T
3R	26711895	Sap-r	Sap-r:4	missense	31	0.189024	21	T	C	T	0.6691	37.6392	8.51164e-10	3L	10982553	klu	klu-in	intronic	32	0.191617	11	A	T	A
X	1538072	br	br-u3	UTR	57	0.341317	17	G	A	G	0.62555	37.6386	8.51452e-10	2L	378200	al	al-u5	UTR	35	0.212121	19	C	T	C
2L	378200	al	al-u5	UTR	35	0.212121	19	C	T	C	0.62555	37.6386	8.51452e-10	X	1538072	br	br-u3	UTR	57	0.341317	17	G	A	G
2R	3257902	Dscam	Dscam-in	intronic	37	0.22561	13	C	T	C	0.66917	37.6276	8.56232e-10	X	2404664	trol	trol-in	intronic	35	0.212121	15	A	G	A
3L	1358455	ru	-12165	intergenic	46	0.292994	16	T	C	T	0.58406	37.6271	8.56454e-10	2L	4089845	ed	ed-in	intronic	46	0.2875	10	C	T	T
3L	1358455	ru	-12165	intergenic	46	0.292994	16	T	C	T	0.58406	37.6271	8.56454e-10	2L	4089845	ed	ed-in	intronic	46	0.2875	10	C	T	T
3L	1358455	312	5602	intergenic	46	0.292994	16	T	C	T	0.58406	37.6271	8.56454e-10	2L	4089845	ed	ed-in	intronic	46	0.2875	10	C	T	T
3L	1358455	312	5602	intergenic	46	0.292994	16	T	C	T	0.58406	37.6271	8.56454e-10	2L	4089845	ed	ed-in	intronic	46	0.2875	10	C	T	T
3L	1358455	Ptp61F	Ptp61F-in	intronic	46	0.292994	16	T	C	T	0.58406	37.6271	8.56454e-10	2L	4089845	ed	ed-in	intronic	46	0.2875	10	C	T	T
3L	1358455	Ptp61F	Ptp61F-in	intronic	46	0.292994	16	T	C	T	0.58406	37.6271	8.56454e-10	2L	4089845	ed	ed-in	intronic	46	0.2875	10	C	T	T
3R	8929396	2mit	-22437	intergenic	73	0.462025	14	T	C	C	0.50263	37.627	8.56492e-10	2L	3156949	Mad	Mad-in	intronic	69	0.436709	15	A	G	G
3R	8929396	CG34308	13591	intergenic	73	0.462025	14	T	C	C	0.50263	37.627	8.56492e-10	2L	3156949	Mad	Mad-in	intronic	69	0.436709	15	A	G	G
3R	8929396	timeout	timeout-in	intronic	73	0.462025	14	T	C	C	0.50263	37.627	8.56492e-10	2L	3156949	Mad	Mad-in	intronic	69	0.436709	15	A	G	G
X	15125222	PPYR1	-12663	intergenic	76	0.457831	8	A	T	T	-0.4828	37.6247	8.57508e-10	2L	7918930	Snoo	Snoo-in	intronic	56	0.356688	15	A	T	A
X	15125222	CG9101	1314	intergenic	76	0.457831	8	A	T	T	-0.4828	37.6247	8.57508e-10	2L	7918930	Snoo	Snoo-in	intronic	56	0.356688	15	A	T	A
2L	11376410	salm	-57901	intergenic	33	0.210191	14	C	T	T	0.62799	37.6207	8.59294e-10	3R	15150618	Dl	Dl-in	intronic	49	0.304348	15	G	A	G
2L	11376410	salr	3013	intergenic	33	0.210191	14	C	T	T	0.62799	37.6207	8.59294e-10	3R	15150618	Dl	Dl-in	intronic	49	0.304348	15	G	A	G
2R	6884809	luna	luna-in	intronic	23	0.139394	21	C	T	C	-0.76223	37.6204	8.59422e-10	X	18460220	Bx	Bx-in	intronic	47	0.288344	10	A	T	T
3R	15903799	Rh3	-2973	intergenic	19	0.114458	18	G	A	G	-0.70669	37.6147	8.61928e-10	2R	9775011	shot	shot:21	missense	56	0.35	19	G	A	G
3R	15903799	CG4973	18786	intergenic	19	0.114458	18	G	A	G	-0.70669	37.6147	8.61928e-10	2R	9775011	shot	shot:21	missense	56	0.35	19	G	A	G
X	6450280	CG34417	CG34417:8	missense	60	0.361446	16	A	G	G	-0.51821	37.6138	8.62346e-10	2L	2942160	lilli	lilli-in	intronic	74	0.465409	15	G	A	A
2L	8713414	raw	raw-in	intronic	38	0.234568	14	A	T	A	-0.77804	37.612	8.6312e-10	3R	26165277	hdc	hdc-in	intronic	28	0.17284	13	A	G	A
3L	3121911	prominin-like	prominin-like-in	intronic	80	0.479042	16	G	T	T	0.49629	37.6086	8.64605e-10	3R	1011298	cno	cno-in	intronic	63	0.406452	17	G	C	G
3L	3121911	prominin-like	prominin-like-in	intronic	80	0.479042	16	G	T	T	0.49629	37.6086	8.64605e-10	3R	1011301	cno	cno-in	intronic	63	0.406452	18	G	T	G
3L	12054193	Sema-5c	-6418	intergenic	74	0.45122	14	C	G	C	0.52469	37.6029	8.67149e-10	2R	18155472	dve	dve-in	intronic	50	0.3125	19	C	A	C
3L	12054193	CG6793	16928	intergenic	74	0.45122	14	C	G	C	0.52469	37.6029	8.67149e-10	2R	18155472	dve	dve-in	intronic	50	0.3125	19	C	A	C
3L	12054193	rols	rols-cds	synonymous	74	0.45122	14	C	G	C	0.52469	37.6029	8.67149e-10	2R	18155472	dve	dve-in	intronic	50	0.3125	19	C	A	C
[truncated: 142 more rows]

## Sheet: IODMIC
Chromosome X	Position X	Gene Symbol X	SNP Location X	Site Class X	Lines with minor allele X	MAF X	Mean Coverage X	Major Allele X	Minor Allele X	Reference SNP X	Beta	Chisquare	Pvalue	Chromosome Y	Position Y	Gene Symbol Y	SNP Location Y	Site Class Y	Lines with minor allele Y	MAF Y	Mean Coverage Y	Major Allele Y	Minor Allele Y	Reference SNP Y
[truncated: 990 more rows]

[truncated: 2 more sheets: rCSF, rCSM]
