# Supplementary material for: Genome-Wide Analysis Reveals Novel Regulators of Growth in Drosophila melanogaster
Source: PLoS Genet. 2016 Jan 11;12(1):e1005616. doi: 10.1371/journal.pgen.1005616 (PMC4709145; doi:10.1371/journal.pgen.1005616)
Supplement: S11 Table — Candidates found as suppressors or enhancers of major growth pathways by Schertel et al. [77]. Candidates associated with nutritional indices in the study of Unckless et al. [78]. (XLS) [file pgen.1005616.s022.xls]

## Sheet: Schertel et al. 
Gene Symbol	Insulin	JAK/STAT	Wg	Myc	Hh
aPKC	Suppression	Suppression
CAP					Suppression
CG10737	Suppression	Suppression	Enhancement	Suppression
CG32676		Suppression	Enhancement
CG9194	Suppression		Enhancement	Suppression
dpr10			Enhancement
Ect4		Suppression
Fps85D			Enhancement		Suppression
Gap1	Suppression		Enhancement	Suppression
kay			Enhancement	Suppression
RpS16	Suppression
RpS3					Suppression
scra		Suppression		Suppression
Smg5				Suppression
sgg	Suppression		Suppression
hrg			Enhancement	Suppression
CG10590			Enhancement
cycA			Enhancement
Wnt2					Suppression
CG9133	Suppression
lola	Suppression		Enhancement		Suppression
betaTub97EF		Suppression
fz2			Enhancement
sm			Enhancement	Suppression	Suppression

## Sheet: Unckless et al.
Gene Symbol	Candidate in	Function
Dhc64C	GWAS	motor protein
CG34354	Epistasis	RNA binding
pigs	GWAS	cytoskeletal adaptor
ths	Epistasis	FGF receptor binding
CG8706	Epistasis	Ca-binding, LDL receptor activity
CG3347	Epistasis	Zinc ion binding
Grip	Epistasis	Glutamate receptor binding
CG7337	Epistasis
Hs6st	Epistasis	Sulfotransferase, tracheal development
RunxB	Epistasis	ATP/DNA binding
CG10737	Epistasis	Intracellular signaling
Vsx2	Epistasis	DNA-binding, transcription fcator activity
CG32113	Epistasis	Vesicle mediated transport
luna	Epistasis	transcription factor
Smr	Epistasis	transcription
